# Supplementary material for: Accurate predictions of SARS-CoV-2 infectivity from comprehensive analysis
Source: eLife. 2024 Dec 24;13:RP99833. doi: 10.7554/eLife.99833 (PMC11668528; doi:10.7554/eLife.99833)
Supplement: Supplementary file 1. — (a) The number of polarity changes in the receptor binding motif (RBM). (b) The number of polarity changes in the spike protein. (c) Configuration of polarity changes caused by variants of concern (VOCs) in the RBM. (d) The number of amino acids in VOCs. (e) The number of transitions and transversions in the spike protein from viral sequences. (f) Epidemiological information (cases and deaths per million population) from Our World in Data (OWID). (g) Amino acid substitution of sublineages. (h) Symptomatic information (symptomatic and asymptomatic) from Global Initiative on Sharing All Influenza Data (GISAID). (i) Severity information (severe and mild) from GISAID. (j) Gene expression data between the Delta variant and Omicron (BA.4/5) variant from Gene Expression Omnibus (GEO) dataset. (k) Binding affinity between proteins in protein 3D structure using pDockQ. (i) Evaluation of hydrogen bonds (H-bond) through protein 3D structure prediction of SARS-CoV-2. (m) Binding affinity between proteins in protein 3D structure using HADDOCK. (n) The number of mutations per codon in the RBM. (o) The number of mutations per codon in the receptor binding domain (RBD). (p) The number of mutations per codon in the spike protein. (q) Amino acid property eigen selection score (APESS) score for each mutation with VOCs as the backbone. (r) Prediction of mutation probability using lightGBM. (s) Prediction of mutation probability using XGBoost. (t) Prediction of mutation probability using Random Forest. (u) Prediction of mutation probability using ensemble. (v) Prediction of mutation probability using deep learning. (w) The number of samples by clade in global SARS-CoV-2 analysis data. (x) Amino acid property values utilizing principal component analysis (PCA) clustering. [file elife-99833-supp1.xlsx]

## Sheet: Index
	Description
Supplementary File 1 a	The number of polarity changes in the Receptor Binding Motif (RBM)
Supplementary File 1 b	The number of polarity changes in the spike protein
Supplementary File 1 c	Configuration of polarity changes caused by Variants of Concern (VOCs) in the RBM
Supplementary File 1 d	The number of amino acids in VOCs
Supplementary File 1 e	The number of transitions and transversions in the spike protein from viral sequences
Supplementary File 1 f	Epidemiological information (cases and deaths per million population) from Our World in Data (OWID)
Supplementary File 1 g	Amino acid substitution of sublineages
Supplementary File 1 h	Symptomatic information (symptomatic and asymptomatic) from GISAID
Supplementary File 1 i	Severity information (severe and mild) from GISAID
Supplementary File 1 j	gene expression data between Delta variant and Omicron(BA.4/5) variant from GEO dataset
Supplementary File 1 k	Binding affinity between proteins in protein 3D structure using pDockQ
Supplementary File 1 l	Evaluation of hydrogen bonds (H-bond) through protein 3D structure prediction of SARS-CoV-2
Supplementary File 1 m	Binding affinity between proteins in protein 3D structure using HADDOCK
Supplementary File 1 n	The number of mutations per codon in the RBM
Supplementary File 1 o	The number of mutations per codon in the Receptor Binding Domain (RBD)
Supplementary File 1 p	The number of mutations per codon in the spike protein
Supplementary File 1 q	APESS score for each mutation with VOCs as the backbone
Supplementary File 1 r	Prediction of mutation probability using lightGBM
Supplementary File 1 s	Prediction of mutation probability using XGBoost
Supplementary File 1 t	Prediction of mutation probability using random Forest
Supplementary File 1 u	Prediction of mutation probability using ensemble
Supplementary File 1 v	Prediction of mutation probability using deep learning
Supplementary File 1 w	The number of samples by clade in global SARS-CoV-2 analysis data
Supplementary File 1 x	Amino acid property values utilizing PCA clustering

## Sheet: Supplementary File 1 a
Supplementary File 1 a | The number of polarity changes in the Receptor Binding Motif (RBM)
N: hydrophobic (nonpolar), P: hydrophilic (polar), A: acidic, and B: alkaline, Red:maximum, Blue: minimum
	NN*	NP*	NA*	NB*	PN*	PP*	PA*	PB*	AN*	AP*	AA*	AB*	BN*	BP*	BA*	BB*
Wuhan-Hu-1	12	11	3	2	11	17	1	2	3	1	0	1	3	1	1	1
Alpha	12	11	3	2	11	17	1	2	3	1	0	1	3	1	1	1
Beta	12	11	2	3	11	17	1	2	2	1	0	1	4	1	1	1
Delta	12	10	3	2	9	16	1	4	3	1	0	1	4	2	1	1
BA.1	13	8	2	5	9	15	1	3	2	1	0	1	5	3	1	1
BA.2	14	8	2	5	8	13	1	4	2	1	0	1	6	3	1	1
BA.2.75	12	10	2	4	8	13	1	5	2	1	0	1	7	2	1	1
BA.4	14	8	2	4	7	14	1	5	2	1	0	1	6	3	1	1
BQ.1	14	8	2	4	7	14	1	5	2	1	0	1	6	3	1	1
XBB	10	10	2	4	8	15	1	5	2	1	0	1	7	2	1	1

## Sheet: Supplementary File 1 b
Supplementary File 1 b | The number of polarity changes in the spike protein
N: hydrophobic (nonpolar), P: hydrophilic (polar), A: acidic, and B: alkaline, Red:maximum, Blue: minimum
RBD	NN*	NP*	NA*	NB*	PN*	PP*	PA*	PB*	AN*	AP*	AA*	AB*	BN*	BP*	BA*	BB*
Wuhan-Hu-1	40	40	10	10	39	31	3	8	8	5	2	1	13	6	1	4
Alpha	40	40	10	10	39	31	3	8	8	5	2	1	13	6	1	4
Beta	40	41	9	10	40	31	3	8	7	5	2	1	13	6	1	4
Delta	40	39	10	10	37	30	3	10	8	5	2	1	14	7	1	4
BA.1	44	36	9	13	36	27	3	9	7	5	3	1	15	8	1	4
BA.2	47	38	8	11	35	26	4	10	7	5	2	1	15	7	1	4
BA.2.75	45	40	7	11	35	26	4	11	7	5	1	1	16	6	2	4
BA.4	47	38	8	10	34	27	4	11	7	5	2	1	15	7	1	4
BQ.1	47	38	8	10	34	27	4	11	7	5	2	1	15	7	1	4
XBB	43	40	7	11	36	29	4	10	7	5	1	1	15	6	2	4
SARS-CoV-1	46	36	12	10	35	30	3	7	10	4	2	2	13	6	1	3
MERS-CoV	42	41	6	5	41	34	7	6	7	5	2	1	4	7	0	2

## Sheet: Supplementary File 1 c
Supplementary File 1 c | Configuration of polarity changes caused by Variants of Concern (VOCs) in the RBM
	Wuhan-Hu-1	Alpha	Beta	Delta	BA.1	BA.2	BA.2.75	BA.4	BA.5	BQ.1	XBB
Hydrophilic (P)	32	32	32	31	29	27	28	28	28	28	30
Hydrophobic (N)	29	29	29	28	29	30	29	29	29	29	27
Alkaline (B)	6	6	7	8	10	11	11	11	11	11	11
Acidic (A)	5	5	4	5	4	4	4	4	4	4	4

## Sheet: Supplementary File 1 d
Supplementary File 1 d | The number of amino acids in VOCs
	Amino acid	Wuhan-Hu-1	Alpha	Beta	Delta	BA.1	BA.2	BA.2.75	BA.4	BA.5	BQ.1	XBB
Hydrophilic	Y	8	9	9	8	8	8	8	8	8	8	8
	T	3	3	3	2	2	2	2	2	2	3	2
	S	6	6	6	6	6	5	6	5	5	5	8
	Q	4	4	4	4	2	2	3	3	3	3	3
	N	9	8	8	9	9	8	7	8	8	7	7
	C	2	2	2	2	2	2	2	2	2	2	2
Hydrophobic	V	3	3	3	3	3	3	3	4	4	4	2
	P	5	5	5	5	5	5	5	5	5	5	6
	L	5	5	5	4	5	5	5	4	4	4	5
	I	2	2	2	2	2	2	2	2	2	2	2
	G	8	8	8	8	7	8	7	8	8	8	7
	F	5	5	5	5	5	5	5	4	4	4	3
	A	1	1	1	1	2	2	2	2	2	2	2
Alkaline	R	3	3	3	4	5	5	4	5	5	5	4
	K	3	3	4	4	4	5	6	5	5	5	6
	H	0	0	0	0	1	1	1	1	1	1	1
Acidic	E	3	3	2	3	2	2	2	2	2	2	2
	D	2	2	2	2	2	2	2	2	2	2	2

## Sheet: Supplementary File 1 e
Supplementary File 1 e | The number of transitions and transversions in the spike protein from viral sequences
		The number of changes
Transitions	A->G	15632562
	G->A	18612939
	C->U	25258353
	U->C	8689628
Transversions	A->T	7501762
	T->A	3846256
	G->C	1127634
	C->G	5396648
	A->C	5565641
	C->A	16822479
	G->T	7505293
	T->G	13404095

## Sheet: Supplementary File 1 f
Supplementary File 1 f | Epidemiological information (cases and deaths per million population) from Our World in Data (OWID)
iso_code	location	date	new_cases_per_million	new_deaths_per_million	reproduction_rate	total_vaccinations_per_hundred
OWID_WRL	World	2020-01-03	0	0
OWID_WRL	World	2020-01-04	0	0
OWID_WRL	World	2020-01-05	0	0
OWID_WRL	World	2020-01-06	0	0
OWID_WRL	World	2020-01-07	0	0
OWID_WRL	World	2020-01-08	0	0
OWID_WRL	World	2020-01-09	0	0
OWID_WRL	World	2020-01-10	0	0
OWID_WRL	World	2020-01-11	0	0
OWID_WRL	World	2020-01-12	0.005	0
OWID_WRL	World	2020-01-13	0	0
OWID_WRL	World	2020-01-14	0.001	0
OWID_WRL	World	2020-01-15	0	0
OWID_WRL	World	2020-01-16	0	0
OWID_WRL	World	2020-01-17	0.001	0
OWID_WRL	World	2020-01-18	0.001	0
OWID_WRL	World	2020-01-19	0.01	0
OWID_WRL	World	2020-01-20	0.01	0
OWID_WRL	World	2020-01-21	0.012	0
OWID_WRL	World	2020-01-22	0.019	0.001
OWID_WRL	World	2020-01-23	0.017	0	3.15
OWID_WRL	World	2020-01-24	0.034	0.001	3.32
OWID_WRL	World	2020-01-25	0.059	0.002	3.48
OWID_WRL	World	2020-01-26	0.088	0.002	3.55
OWID_WRL	World	2020-01-27	0.099	0.003	3.59
OWID_WRL	World	2020-01-28	0.223	0.006	3.58
OWID_WRL	World	2020-01-29	0.185	0	3.26
OWID_WRL	World	2020-01-30	0.22	0.005	3.04
OWID_WRL	World	2020-01-31	0.253	0.005	2.82
OWID_WRL	World	2020-02-01	0.265	0.006	2.68
OWID_WRL	World	2020-02-02	0.329	0.013	2.57
OWID_WRL	World	2020-02-03	0.356	0.008	2.35
OWID_WRL	World	2020-02-04	0.408	0.008	2.11
OWID_WRL	World	2020-02-05	0.494	0.009	1.98
OWID_WRL	World	2020-02-06	0.466	0.009	1.76
OWID_WRL	World	2020-02-07	0.396	0.011	1.64
OWID_WRL	World	2020-02-08	0.426	0.011	1.53
OWID_WRL	World	2020-02-09	0.338	0.013	1.45
OWID_WRL	World	2020-02-10	0.375	0.013	1.43
OWID_WRL	World	2020-02-11	0.311	0.013	1.44
OWID_WRL	World	2020-02-12	0.255	0.001	1.56
OWID_WRL	World	2020-02-13	1.902	0.032	1.72
OWID_WRL	World	2020-02-14	0.51	0.019	1.49
OWID_WRL	World	2020-02-15	0.334	0.018	1.22
OWID_WRL	World	2020-02-16	0.256	0.013	1.01
OWID_WRL	World	2020-02-17	0.259	0.012	0.85
OWID_WRL	World	2020-02-18	0.239	0.017	0.72
OWID_WRL	World	2020-02-19	0.226	0.014	0.64
OWID_WRL	World	2020-02-20	0.053	0.015	0.55
OWID_WRL	World	2020-02-21	0.125	0	0.55
OWID_WRL	World	2020-02-22	0.134	0.026	0.57
OWID_WRL	World	2020-02-23	0.124	0.001	0.57
OWID_WRL	World	2020-02-24	0.065	0.02	0.61
OWID_WRL	World	2020-02-25	0.099	0.01	0.67
OWID_WRL	World	2020-02-26	0.107	0.008	0.77
OWID_WRL	World	2020-02-27	0.137	0.005	0.85
OWID_WRL	World	2020-02-28	0.151	0.007	0.96
OWID_WRL	World	2020-02-29	0.228	0.008	1.1
OWID_WRL	World	2020-03-01	0.251	0.007	1.21
OWID_WRL	World	2020-03-02	0.244	0.008	1.28
OWID_WRL	World	2020-03-03	0.225	0.009	1.36
OWID_WRL	World	2020-03-04	0.278	0.011	1.42
OWID_WRL	World	2020-03-05	0.271	0.011	1.49
OWID_WRL	World	2020-03-06	0.312	0.013	1.58
OWID_WRL	World	2020-03-07	0.408	0.013	1.64
OWID_WRL	World	2020-03-08	0.785	0.017	1.7
OWID_WRL	World	2020-03-09	0.4	0.028	1.76
OWID_WRL	World	2020-03-10	0.474	0.022	1.85
OWID_WRL	World	2020-03-11	0.485	0.034	1.94
OWID_WRL	World	2020-03-12	0.75	0.038	1.99
OWID_WRL	World	2020-03-13	0.843	0.04	2.07
OWID_WRL	World	2020-03-14	0.912	0.05	2.07
OWID_WRL	World	2020-03-15	3.665	0.12	2.06
OWID_WRL	World	2020-03-16	1.066	0.071	2.07
OWID_WRL	World	2020-03-17	1.295	0.073	2.07
OWID_WRL	World	2020-03-18	1.444	0.079	2.09
OWID_WRL	World	2020-03-19	1.768	0.098	2.11
OWID_WRL	World	2020-03-20	2.132	0.102	2.09
OWID_WRL	World	2020-03-21	2.564	0.133	2.08
OWID_WRL	World	2020-03-22	11.17	0.655	2.05
OWID_WRL	World	2020-03-23	2.802	0.149	2.01
OWID_WRL	World	2020-03-24	3.329	0.154	1.96
OWID_WRL	World	2020-03-25	3.759	0.187	1.91
OWID_WRL	World	2020-03-26	3.911	0.199	1.85
OWID_WRL	World	2020-03-27	4.754	0.228	1.78
OWID_WRL	World	2020-03-28	5.598	0.283	1.72
OWID_WRL	World	2020-03-29	19.864	1.588	1.65
OWID_WRL	World	2020-03-30	5.419	0.304	1.6
OWID_WRL	World	2020-03-31	6.147	0.365	1.55
OWID_WRL	World	2020-04-01	5.513	0.379	1.49
OWID_WRL	World	2020-04-02	6.527	0.428	1.41
OWID_WRL	World	2020-04-03	7.386	0.475	1.35
OWID_WRL	World	2020-04-04	7.628	0.517	1.29
OWID_WRL	World	2020-04-05	19.879	2.15	1.26
OWID_WRL	World	2020-04-06	7.492	0.551	1.24
OWID_WRL	World	2020-04-07	6.865	0.612	1.21
OWID_WRL	World	2020-04-08	7.594	0.593	1.2
OWID_WRL	World	2020-04-09	7.983	0.663	1.19
OWID_WRL	World	2020-04-10	8.738	0.716	1.18
OWID_WRL	World	2020-04-11	9.123	0.704	1.17
OWID_WRL	World	2020-04-12	17.983	2.142	1.17
OWID_WRL	World	2020-04-13	8.063	0.69	1.14
OWID_WRL	World	2020-04-14	7.232	0.654	1.1
OWID_WRL	World	2020-04-15	7.174	0.675	1.08
OWID_WRL	World	2020-04-16	7.845	0.737	1.06
OWID_WRL	World	2020-04-17	8.409	0.781	1.04
OWID_WRL	World	2020-04-18	9.281	0.919	1.03
OWID_WRL	World	2020-04-19	15.588	1.815	1.02
OWID_WRL	World	2020-04-20	8.327	0.638	1.01
OWID_WRL	World	2020-04-21	8.107	0.65	1
OWID_WRL	World	2020-04-22	8.198	0.687	1
OWID_WRL	World	2020-04-23	8.389	0.74	0.99
OWID_WRL	World	2020-04-24	9.093	0.7	0.99
OWID_WRL	World	2020-04-25	11.185	0.688	0.99
OWID_WRL	World	2020-04-26	14.457	1.466	0.99
OWID_WRL	World	2020-04-27	9.533	0.622	0.99
OWID_WRL	World	2020-04-28	8.185	0.582	0.99
OWID_WRL	World	2020-04-29	8.177	0.619	0.99
OWID_WRL	World	2020-04-30	8.869	0.684	1
OWID_WRL	World	2020-05-01	9.534	0.717	1.01
OWID_WRL	World	2020-05-02	10.507	0.702	1.01
OWID_WRL	World	2020-05-03	13.639	1.233	1.02
OWID_WRL	World	2020-05-04	9.732	0.602	1.03
OWID_WRL	World	2020-05-05	9.585	0.558	1.03
OWID_WRL	World	2020-05-06	9.119	0.556	1.04
OWID_WRL	World	2020-05-07	9.736	0.758	1.03
OWID_WRL	World	2020-05-08	10.65	0.727	1.03
OWID_WRL	World	2020-05-09	11.168	0.697	1.03
OWID_WRL	World	2020-05-10	13.473	0.987	1.03
OWID_WRL	World	2020-05-11	10.753	0.648	1.04
OWID_WRL	World	2020-05-12	8.824	0.526	1.04
OWID_WRL	World	2020-05-13	9.546	0.518	1.05
OWID_WRL	World	2020-05-14	10.404	0.64	1.05
OWID_WRL	World	2020-05-15	10.526	0.618	1.06
OWID_WRL	World	2020-05-16	12.401	0.69	1.07
OWID_WRL	World	2020-05-17	14.145	0.896	1.08
OWID_WRL	World	2020-05-18	11.755	0.588	1.09
OWID_WRL	World	2020-05-19	9.614	0.493	1.09
OWID_WRL	World	2020-05-20	11.507	0.54	1.1
OWID_WRL	World	2020-05-21	12.581	0.639	1.09
OWID_WRL	World	2020-05-22	13.225	0.628	1.09
OWID_WRL	World	2020-05-23	13.03	0.618	1.08
OWID_WRL	World	2020-05-24	15.662	0.852	1.08
OWID_WRL	World	2020-05-25	11.974	0.53	1.08
OWID_WRL	World	2020-05-26	11.428	0.509	1.08
OWID_WRL	World	2020-05-27	10.935	0.52	1.09
OWID_WRL	World	2020-05-28	12.106	0.577	1.11
OWID_WRL	World	2020-05-29	13.239	0.637	1.12
OWID_WRL	World	2020-05-30	14.793	0.664	1.12
OWID_WRL	World	2020-05-31	16.95	0.748	1.12
OWID_WRL	World	2020-06-01	15.688	0.581	1.11
OWID_WRL	World	2020-06-02	13.447	0.521	1.11
OWID_WRL	World	2020-06-03	12.146	0.531	1.1
OWID_WRL	World	2020-06-04	15.255	0.657	1.1
OWID_WRL	World	2020-06-05	15.57	0.681	1.1
OWID_WRL	World	2020-06-06	15.639	0.686	1.09
OWID_WRL	World	2020-06-07	18.173	0.717	1.09
OWID_WRL	World	2020-06-08	15.479	0.627	1.08
OWID_WRL	World	2020-06-09	13.528	0.506	1.08
OWID_WRL	World	2020-06-10	13.369	0.567	1.08
OWID_WRL	World	2020-06-11	16.196	0.668	1.08
OWID_WRL	World	2020-06-12	17.344	0.687	1.08
OWID_WRL	World	2020-06-13	17.472	0.683	1.09
OWID_WRL	World	2020-06-14	19.796	0.686	1.11
OWID_WRL	World	2020-06-15	16.355	0.591	1.11
OWID_WRL	World	2020-06-16	14.655	0.551	1.11
OWID_WRL	World	2020-06-17	15.169	0.755	1.11
OWID_WRL	World	2020-06-18	22.545	0.691	1.12
OWID_WRL	World	2020-06-19	18.16	0.701	1.13
OWID_WRL	World	2020-06-20	17.612	0.692	1.13
OWID_WRL	World	2020-06-21	24.832	0.715	1.11
OWID_WRL	World	2020-06-22	19.125	0.633	1.12
OWID_WRL	World	2020-06-23	16.08	0.512	1.13
OWID_WRL	World	2020-06-24	17.363	0.536	1.13
OWID_WRL	World	2020-06-25	21.359	0.693	1.14
OWID_WRL	World	2020-06-26	22.159	0.669	1.14
OWID_WRL	World	2020-06-27	22.9	0.88	1.14
OWID_WRL	World	2020-06-28	26.233	0.684	1.14
OWID_WRL	World	2020-06-29	22.027	0.623	1.13
OWID_WRL	World	2020-06-30	19.547	0.548	1.13
OWID_WRL	World	2020-07-01	20.941	0.609	1.13
OWID_WRL	World	2020-07-02	22.726	0.66	1.12
OWID_WRL	World	2020-07-03	26.12	0.668	1.11
OWID_WRL	World	2020-07-04	26.45	0.693	1.11
OWID_WRL	World	2020-07-05	28.79	0.76	1.11
OWID_WRL	World	2020-07-06	23.632	0.654	1.11
OWID_WRL	World	2020-07-07	20.618	0.588	1.11
OWID_WRL	World	2020-07-08	21.717	0.631	1.1
OWID_WRL	World	2020-07-09	26.458	0.734	1.1
OWID_WRL	World	2020-07-10	27.84	0.741	1.1
OWID_WRL	World	2020-07-11	27.475	0.747	1.1
OWID_WRL	World	2020-07-12	31.447	0.77	1.09
OWID_WRL	World	2020-07-13	27.043	0.729	1.09
OWID_WRL	World	2020-07-14	23.916	0.645	1.09
OWID_WRL	World	2020-07-15	23.685	0.665	1.09
OWID_WRL	World	2020-07-16	28.524	0.773	1.09
OWID_WRL	World	2020-07-17	30.084	0.814	1.09
OWID_WRL	World	2020-07-18	30.337	0.903	1.09
OWID_WRL	World	2020-07-19	33.79	0.807	1.1
OWID_WRL	World	2020-07-20	28.371	0.75	1.1
OWID_WRL	World	2020-07-21	25.215	0.692	1.1
OWID_WRL	World	2020-07-22	25.708	0.698	1.1
OWID_WRL	World	2020-07-23	30.54	0.951	1.1
OWID_WRL	World	2020-07-24	35.796	0.814	1.09
OWID_WRL	World	2020-07-25	34.772	0.842	1.08
OWID_WRL	World	2020-07-26	38.125	0.869	1.07
OWID_WRL	World	2020-07-27	31.071	0.786	1.07
OWID_WRL	World	2020-07-28	26.49	0.694	1.06
OWID_WRL	World	2020-07-29	27.974	0.749	1.05
OWID_WRL	World	2020-07-30	31.923	0.792	1.05
OWID_WRL	World	2020-07-31	36.866	0.9	1.04
OWID_WRL	World	2020-08-01	35.56	0.828	1.03
OWID_WRL	World	2020-08-02	40.728	0.872	1.03
OWID_WRL	World	2020-08-03	31.232	0.824	1.03
OWID_WRL	World	2020-08-04	27.354	0.723	1.03
OWID_WRL	World	2020-08-05	26.629	0.734	1.03
OWID_WRL	World	2020-08-06	33.023	0.856	1.03
OWID_WRL	World	2020-08-07	35.372	0.887	1.03
OWID_WRL	World	2020-08-08	34.195	0.831	1.03
OWID_WRL	World	2020-08-09	42.737	0.874	1.03
OWID_WRL	World	2020-08-10	31.798	0.811	1.02
OWID_WRL	World	2020-08-11	26.634	0.7	1.02
OWID_WRL	World	2020-08-12	27.705	0.694	1.01
OWID_WRL	World	2020-08-13	35.152	0.849	1.01
OWID_WRL	World	2020-08-14	35.001	0.857	1.01
OWID_WRL	World	2020-08-15	35.651	0.827	1
OWID_WRL	World	2020-08-16	44.458	0.867	0.99
OWID_WRL	World	2020-08-17	30.279	0.731	0.99
OWID_WRL	World	2020-08-18	26.443	0.68	0.99
OWID_WRL	World	2020-08-19	27.634	0.701	0.99
OWID_WRL	World	2020-08-20	33.171	0.81	0.98
OWID_WRL	World	2020-08-21	34.085	0.844	0.98
OWID_WRL	World	2020-08-22	32.962	0.769	0.99
OWID_WRL	World	2020-08-23	44.079	0.821	0.99
OWID_WRL	World	2020-08-24	30.759	0.737	1
OWID_WRL	World	2020-08-25	26.428	0.649	1.01
OWID_WRL	World	2020-08-26	27.304	0.669	1.01
OWID_WRL	World	2020-08-27	33.513	0.8	1.02
OWID_WRL	World	2020-08-28	34.095	0.793	1.02
OWID_WRL	World	2020-08-29	33.576	0.722	1.02
OWID_WRL	World	2020-08-30	49.44	0.83	1.03
OWID_WRL	World	2020-08-31	32.196	0.718	1.03
OWID_WRL	World	2020-09-01	26.292	0.596	1.03
OWID_WRL	World	2020-09-02	31.925	0.634	1.02
OWID_WRL	World	2020-09-03	33.373	0.771	1.02
OWID_WRL	World	2020-09-04	34.847	0.772	1.02
OWID_WRL	World	2020-09-05	34.772	0.708	1.02
OWID_WRL	World	2020-09-06	55.478	0.817	1.01
OWID_WRL	World	2020-09-07	32.062	1.142	1.01
OWID_WRL	World	2020-09-08	26.891	0.821	1.02
OWID_WRL	World	2020-09-09	27.749	0.578	1.03
OWID_WRL	World	2020-09-10	30.905	0.619	1.04
OWID_WRL	World	2020-09-11	34.649	0.731	1.04
OWID_WRL	World	2020-09-12	35.477	0.705	1.05
OWID_WRL	World	2020-09-13	58.573	0.825	1.05
OWID_WRL	World	2020-09-14	33.13	0.654	1.05
OWID_WRL	World	2020-09-15	28.716	0.622	1.05
OWID_WRL	World	2020-09-16	30.718	0.593	1.04
OWID_WRL	World	2020-09-17	34.867	0.717	1.04
OWID_WRL	World	2020-09-18	36.588	0.745	1.04
OWID_WRL	World	2020-09-19	35.908	0.671	1.04
OWID_WRL	World	2020-09-20	62.835	0.893	1.03
OWID_WRL	World	2020-09-21	33.209	0.626	1.03
OWID_WRL	World	2020-09-22	28.301	0.559	1.03
OWID_WRL	World	2020-09-23	31.589	0.59	1.02
OWID_WRL	World	2020-09-24	36.515	0.67	1.02
OWID_WRL	World	2020-09-25	35.92	0.696	1.02
OWID_WRL	World	2020-09-26	35.967	0.69	1.02
OWID_WRL	World	2020-09-27	62.203	0.898	1.02
OWID_WRL	World	2020-09-28	33.016	0.636	1.02
OWID_WRL	World	2020-09-29	28.075	0.547	1.02
OWID_WRL	World	2020-09-30	31.837	0.577	1.03
OWID_WRL	World	2020-10-01	36.429	0.701	1.03
OWID_WRL	World	2020-10-02	37.372	0.704	1.04
OWID_WRL	World	2020-10-03	36.892	0.631	1.04
OWID_WRL	World	2020-10-04	63.806	0.914	1.06
OWID_WRL	World	2020-10-05	34.228	0.607	1.07
OWID_WRL	World	2020-10-06	28.824	0.566	1.07
OWID_WRL	World	2020-10-07	34.153	0.577	1.07
OWID_WRL	World	2020-10-08	40.293	0.683	1.07
OWID_WRL	World	2020-10-09	39.409	0.73	1.07
OWID_WRL	World	2020-10-10	40.17	0.655	1.08
OWID_WRL	World	2020-10-11	79.55	0.963	1.08
OWID_WRL	World	2020-10-12	35.707	0.581	1.07
OWID_WRL	World	2020-10-13	31.774	0.56	1.08
OWID_WRL	World	2020-10-14	36.683	0.554	1.09
OWID_WRL	World	2020-10-15	39.407	0.594	1.1
OWID_WRL	World	2020-10-16	42.536	0.677	1.11
OWID_WRL	World	2020-10-17	42.759	0.676	1.12
OWID_WRL	World	2020-10-18	96.92	1.134	1.12
OWID_WRL	World	2020-10-19	38.054	0.605	1.13
OWID_WRL	World	2020-10-20	34.314	0.596	1.14
OWID_WRL	World	2020-10-21	42.989	0.635	1.14
OWID_WRL	World	2020-10-22	46.5	0.708	1.15
OWID_WRL	World	2020-10-23	48.416	0.761	1.15
OWID_WRL	World	2020-10-24	49.084	0.709	1.15
OWID_WRL	World	2020-10-25	128.186	1.381	1.15
OWID_WRL	World	2020-10-26	44.134	0.678	1.16
OWID_WRL	World	2020-10-27	38.104	0.624	1.15
OWID_WRL	World	2020-10-28	48.379	0.688	1.15
OWID_WRL	World	2020-10-29	52.354	0.761	1.14
OWID_WRL	World	2020-10-30	53.742	0.793	1.14
OWID_WRL	World	2020-10-31	54.824	0.787	1.13
OWID_WRL	World	2020-11-01	150.657	1.874	1.13
OWID_WRL	World	2020-11-02	47.599	0.746	1.13
OWID_WRL	World	2020-11-03	51.016	0.703	1.12
OWID_WRL	World	2020-11-04	51.905	0.775	1.11
OWID_WRL	World	2020-11-05	56.154	0.885	1.11
OWID_WRL	World	2020-11-06	60.422	0.948	1.11
OWID_WRL	World	2020-11-07	61.43	0.969	1.11
OWID_WRL	World	2020-11-08	155.076	2.377	1.1
OWID_WRL	World	2020-11-09	55.278	0.804	1.09
OWID_WRL	World	2020-11-10	49.651	0.804	1.08
OWID_WRL	World	2020-11-11	58.337	0.896	1.08
OWID_WRL	World	2020-11-12	64.249	1.007	1.07
OWID_WRL	World	2020-11-13	68.237	0.991	1.06
OWID_WRL	World	2020-11-14	67.376	1.026	1.06
OWID_WRL	World	2020-11-15	144.421	2.674	1.05
OWID_WRL	World	2020-11-16	59.937	1.008	1.05
OWID_WRL	World	2020-11-17	52.679	0.85	1.04
OWID_WRL	World	2020-11-18	59.333	0.914	1.04
OWID_WRL	World	2020-11-19	67.426	1.118	1.03
OWID_WRL	World	2020-11-20	68.26	1.147	1.03
OWID_WRL	World	2020-11-21	69.299	1.173	1.03
OWID_WRL	World	2020-11-22	138.44	3.009	1.03
OWID_WRL	World	2020-11-23	60.626	1.021	1.02
OWID_WRL	World	2020-11-24	53.559	1.017	1.01
OWID_WRL	World	2020-11-25	60.514	1.088	1.01
OWID_WRL	World	2020-11-26	66.114	1.158	1
OWID_WRL	World	2020-11-27	73.274	1.241	1.02
OWID_WRL	World	2020-11-28	64.915	1.135	1.02
OWID_WRL	World	2020-11-29	125.357	2.893	1.03
OWID_WRL	World	2020-11-30	59.355	0.994	1.03
OWID_WRL	World	2020-12-01	54.329	1.004	1.04
OWID_WRL	World	2020-12-02	60.573	1.095	1.04	0
OWID_WRL	World	2020-12-03	71.531	1.238	1.04	0
OWID_WRL	World	2020-12-04	74.618	1.318	1.06	0
OWID_WRL	World	2020-12-05	74.938	1.3	1.07	0
OWID_WRL	World	2020-12-06	131.475	3.013	1.08	0
OWID_WRL	World	2020-12-07	64.841	1.09	1.1	0
OWID_WRL	World	2020-12-08	58.238	0.976	1.11	0
OWID_WRL	World	2020-12-09	64.536	1.155	1.14	0
OWID_WRL	World	2020-12-10	75.504	1.222	1.17	0
OWID_WRL	World	2020-12-11	75.244	1.4	1.11	0
OWID_WRL	World	2020-12-12	73.388	1.266	1.07	0
OWID_WRL	World	2020-12-13	139.394	3.234	1.03	0
OWID_WRL	World	2020-12-14	65.892	1.129	1.01	0
OWID_WRL	World	2020-12-15	58.407	1.067	0.99	0.02
OWID_WRL	World	2020-12-16	68.37	1.187	0.98	0.02
OWID_WRL	World	2020-12-17	72.006	1.309	0.96	0.03
OWID_WRL	World	2020-12-18	80.508	1.381	0.97	0.03
OWID_WRL	World	2020-12-19	80.666	1.427	0.97	0.03
OWID_WRL	World	2020-12-20	143.806	3.246	0.97	0.04
OWID_WRL	World	2020-12-21	65.157	1.198	0.96	0.04
OWID_WRL	World	2020-12-22	59.849	1.087	0.95	0.05
OWID_WRL	World	2020-12-23	66.023	1.208	0.93	0.06
OWID_WRL	World	2020-12-24	74.27	1.362	0.92	0.06
OWID_WRL	World	2020-12-25	73.569	1.357	0.92	0.06
OWID_WRL	World	2020-12-26	68.238	1.261	0.93	0.06
OWID_WRL	World	2020-12-27	109.237	2.783	0.95	0.07
OWID_WRL	World	2020-12-28	51.017	1.025	0.98	0.08
OWID_WRL	World	2020-12-29	55.876	1.122	1.01	0.09
OWID_WRL	World	2020-12-30	64.422	1.271	1.02	0.1
OWID_WRL	World	2020-12-31	81.831	1.498	1.03	0.15
OWID_WRL	World	2021-01-01	82.877	1.549	1.03	0.15
OWID_WRL	World	2021-01-02	74.06	1.413	1.04	0.17
OWID_WRL	World	2021-01-03	122.408	2.941	1.05	0.17
OWID_WRL	World	2021-01-04	64.927	1.148	1.07	0.19
OWID_WRL	World	2021-01-05	65.514	1.112	1.08	0.21
OWID_WRL	World	2021-01-06	71.559	1.296	1.09	0.23
OWID_WRL	World	2021-01-07	85.884	1.543	1.09	0.26
OWID_WRL	World	2021-01-08	87.082	1.563	1.09	0.28
OWID_WRL	World	2021-01-09	90.11	1.664	1.07	0.35
OWID_WRL	World	2021-01-10	162.804	3.254	1.05	0.39
OWID_WRL	World	2021-01-11	76.334	1.43	1.03	0.41
OWID_WRL	World	2021-01-12	67.893	1.339	1.02	0.44
OWID_WRL	World	2021-01-13	70.831	1.483	1	0.49
OWID_WRL	World	2021-01-14	78.726	1.673	0.99	0.52
OWID_WRL	World	2021-01-15	78.094	1.723	0.98	0.56
OWID_WRL	World	2021-01-16	77.284	1.664	0.97	0.58
OWID_WRL	World	2021-01-17	159.296	3.352	0.95	0.6
OWID_WRL	World	2021-01-18	66.632	1.512	0.94	0.63
OWID_WRL	World	2021-01-19	58.835	1.408	0.93	0.67
OWID_WRL	World	2021-01-20	59.265	1.473	0.92	0.77
OWID_WRL	World	2021-01-21	64.781	1.626	0.92	0.82
OWID_WRL	World	2021-01-22	69.471	1.778	0.92	0.87
OWID_WRL	World	2021-01-23	66.173	1.707	0.92	0.9
OWID_WRL	World	2021-01-24	144.851	3.504	0.91	0.92
OWID_WRL	World	2021-01-25	56.779	1.472	0.91	0.96
OWID_WRL	World	2021-01-26	47.701	1.387	0.91	1.1
OWID_WRL	World	2021-01-27	52.972	1.443	0.9	1.15
OWID_WRL	World	2021-01-28	59.721	1.721	0.9	1.21
OWID_WRL	World	2021-01-29	61.938	1.699	0.89	1.27
OWID_WRL	World	2021-01-30	59.527	1.653	0.89	1.31
OWID_WRL	World	2021-01-31	129.831	3.247	0.89	1.35
OWID_WRL	World	2021-02-01	49.83	1.37	0.88	1.39
OWID_WRL	World	2021-02-02	41.51	1.236	0.87	1.44
OWID_WRL	World	2021-02-03	46.927	1.333	0.87	1.59
OWID_WRL	World	2021-02-04	51.98	1.482	0.86	1.65
OWID_WRL	World	2021-02-05	50.388	1.478	0.87	1.73
OWID_WRL	World	2021-02-06	51.581	1.381	0.86	1.77
OWID_WRL	World	2021-02-07	104.622	2.915	0.86	1.79
OWID_WRL	World	2021-02-08	42.647	1.224	0.86	1.83
OWID_WRL	World	2021-02-09	36.873	1.06	0.86	2.01
OWID_WRL	World	2021-02-10	38.762	1.169	0.86	2.08
OWID_WRL	World	2021-02-11	44.395	1.326	0.86	2.15
OWID_WRL	World	2021-02-12	46.756	1.338	0.86	2.23
OWID_WRL	World	2021-02-13	45.973	1.362	0.87	2.28
OWID_WRL	World	2021-02-14	85.604	2.738	0.88	2.31
OWID_WRL	World	2021-02-15	36.477	1.181	0.88	2.37
OWID_WRL	World	2021-02-16	32.275	0.974	0.89	2.43
OWID_WRL	World	2021-02-17	36.289	0.965	0.9	2.5
OWID_WRL	World	2021-02-18	39.995	1.028	0.91	2.58
OWID_WRL	World	2021-02-19	41.704	1.146	0.93	2.66
OWID_WRL	World	2021-02-20	41.604	1.166	0.95	2.71
OWID_WRL	World	2021-02-21	81.768	2.123	0.96	2.74
OWID_WRL	World	2021-02-22	37.791	0.973	0.98	2.79
OWID_WRL	World	2021-02-23	33.403	0.896	0.99	2.86
OWID_WRL	World	2021-02-24	37.338	0.95	1	2.94
OWID_WRL	World	2021-02-25	45.396	1.042	1	3.03
OWID_WRL	World	2021-02-26	46.415	1.094	1	3.13
OWID_WRL	World	2021-02-27	46.038	1.183	1	3.19
OWID_WRL	World	2021-02-28	87.239	1.887	0.99	3.38
OWID_WRL	World	2021-03-01	39.292	0.942	0.99	3.45
OWID_WRL	World	2021-03-02	33.83	0.825	1	3.59
OWID_WRL	World	2021-03-03	39.141	0.901	1.01	3.69
OWID_WRL	World	2021-03-04	44.872	0.976	1.03	3.81
OWID_WRL	World	2021-03-05	47.394	1.102	1.04	3.93
OWID_WRL	World	2021-03-06	47.077	0.992	1.04	4.02
OWID_WRL	World	2021-03-07	91.605	1.846	1.05	4.06
OWID_WRL	World	2021-03-08	40.107	0.883	1.05	4.16
OWID_WRL	World	2021-03-09	40.416	0.839	1.06	4.27
OWID_WRL	World	2021-03-10	39.181	0.851	1.06	4.39
OWID_WRL	World	2021-03-11	48.398	1.005	1.07	4.51
OWID_WRL	World	2021-03-12	50.841	1.129	1.07	4.65
OWID_WRL	World	2021-03-13	50.813	1.059	1.08	4.74
OWID_WRL	World	2021-03-14	101.863	1.843	1.08	4.94
OWID_WRL	World	2021-03-15	43.858	0.916	1.09	5.07
OWID_WRL	World	2021-03-16	39.099	0.83	1.1	5.19
OWID_WRL	World	2021-03-17	43.989	0.875	1.11	5.33
OWID_WRL	World	2021-03-18	55.514	1.111	1.11	5.46
OWID_WRL	World	2021-03-19	57.707	1.127	1.11	5.63
OWID_WRL	World	2021-03-20	57.864	1.11	1.11	5.86
OWID_WRL	World	2021-03-21	119.449	1.955	1.11	5.92
OWID_WRL	World	2021-03-22	51.32	1.234	1.12	6.12
OWID_WRL	World	2021-03-23	45.341	0.867	1.12	6.28
OWID_WRL	World	2021-03-24	51.816	0.99	1.13	6.47
OWID_WRL	World	2021-03-25	62.154	1.194	1.13	6.69
OWID_WRL	World	2021-03-26	65.512	1.085	1.12	6.94
OWID_WRL	World	2021-03-27	65.116	1.146	1.12	7.12
OWID_WRL	World	2021-03-28	139.492	2.147	1.11	7.23
OWID_WRL	World	2021-03-29	58.445	1.124	1.1	7.43
OWID_WRL	World	2021-03-30	50.85	1.015	1.1	7.63
OWID_WRL	World	2021-03-31	55.582	1.049	1.1	7.88
OWID_WRL	World	2021-04-01	67.551	1.33	1.09	8.16
OWID_WRL	World	2021-04-02	70.176	1.337	1.08	8.42
OWID_WRL	World	2021-04-03	71.155	1.35	1.08	8.57
OWID_WRL	World	2021-04-04	142.229	2.254	1.09	8.7
OWID_WRL	World	2021-04-05	58.739	1.024	1.09	8.88
OWID_WRL	World	2021-04-06	53.526	0.863	1.1	9.1
OWID_WRL	World	2021-04-07	60.91	1.075	1.11	9.35
OWID_WRL	World	2021-04-08	78.12	1.561	1.13	9.65
OWID_WRL	World	2021-04-09	82.533	1.481	1.13	9.94
OWID_WRL	World	2021-04-10	81.669	1.573	1.13	10.13
OWID_WRL	World	2021-04-11	156.301	2.502	1.14	10.28
OWID_WRL	World	2021-04-12	76.213	1.254	1.13	10.51
OWID_WRL	World	2021-04-13	68.74	1.174	1.13	10.73
OWID_WRL	World	2021-04-14	76.394	1.219	1.12	10.97
OWID_WRL	World	2021-04-15	88.779	1.552	1.11	11.21
OWID_WRL	World	2021-04-16	88.871	1.52	1.11	11.45
OWID_WRL	World	2021-04-17	89.964	1.537	1.11	11.61
OWID_WRL	World	2021-04-18	167.257	2.517	1.1	11.74
OWID_WRL	World	2021-04-19	88.725	1.429	1.1	11.93
OWID_WRL	World	2021-04-20	80.154	1.28	1.09	12.12
OWID_WRL	World	2021-04-21	85.171	1.359	1.09	12.36
OWID_WRL	World	2021-04-22	98.299	1.641	1.08	12.64
OWID_WRL	World	2021-04-23	100.395	1.658	1.07	12.89
OWID_WRL	World	2021-04-24	95.649	1.489	1.06	13.03
OWID_WRL	World	2021-04-25	165.85	2.608	1.05	13.25
OWID_WRL	World	2021-04-26	92.114	1.572	1.04	13.46
OWID_WRL	World	2021-04-27	81.328	1.365	1.04	13.73
OWID_WRL	World	2021-04-28	86.977	1.447	1.03	14.05
OWID_WRL	World	2021-04-29	99.688	1.786	1.02	14.36
OWID_WRL	World	2021-04-30	100.963	1.721	1.01	14.7
OWID_WRL	World	2021-05-01	98.96	1.664	1	14.86
OWID_WRL	World	2021-05-02	153.957	2.493	0.99	15
OWID_WRL	World	2021-05-03	89.062	1.528	0.99	15.19
OWID_WRL	World	2021-05-04	80.033	1.323	0.98	15.43
OWID_WRL	World	2021-05-05	85.307	1.412	0.97	15.69
OWID_WRL	World	2021-05-06	97.42	1.708	0.97	15.99
OWID_WRL	World	2021-05-07	98.426	1.663	0.96	16.35
OWID_WRL	World	2021-05-08	95.036	1.618	0.96	16.59
OWID_WRL	World	2021-05-09	139.918	2.312	0.94	16.76
OWID_WRL	World	2021-05-10	84.432	1.509	0.93	17.04
OWID_WRL	World	2021-05-11	76.083	1.369	0.92	17.35
OWID_WRL	World	2021-05-12	76.491	1.387	0.91	17.69
OWID_WRL	World	2021-05-13	87.344	1.589	0.9	18.02
OWID_WRL	World	2021-05-14	84.721	1.582	0.89	18.37
OWID_WRL	World	2021-05-15	80.508	1.489	0.88	18.66
OWID_WRL	World	2021-05-16	113.856	2.06	0.87	18.93
OWID_WRL	World	2021-05-17	73.714	1.471	0.86	19.27
OWID_WRL	World	2021-05-18	65.69	1.401	0.85	19.63
OWID_WRL	World	2021-05-19	66.588	1.436	0.84	19.98
OWID_WRL	World	2021-05-20	75.82	1.565	0.82	20.41
OWID_WRL	World	2021-05-21	75.061	1.569	0.84	20.82
OWID_WRL	World	2021-05-22	73.433	1.535	0.86	21.15
OWID_WRL	World	2021-05-23	98.505	1.832	0.87	21.43
OWID_WRL	World	2021-05-24	63.561	1.393	0.87	21.8
OWID_WRL	World	2021-05-25	54.217	1.137	0.87	22.22
OWID_WRL	World	2021-05-26	58.43	1.332	0.87	22.67
OWID_WRL	World	2021-05-27	67.016	1.436	0.87	23.08
OWID_WRL	World	2021-05-28	65.036	1.45	0.87	23.54
OWID_WRL	World	2021-05-29	59.637	1.381	0.87	23.92
OWID_WRL	World	2021-05-30	76.966	1.728	0.87	24.27
OWID_WRL	World	2021-05-31	55.938	1.268	0.87	24.73
OWID_WRL	World	2021-06-01	46.713	1.045	0.87	25.22
OWID_WRL	World	2021-06-02	46.978	1.116	0.86	25.73
OWID_WRL	World	2021-06-03	54.726	1.271	0.86	26.17
OWID_WRL	World	2021-06-04	56.94	1.293	0.86	26.69
OWID_WRL	World	2021-06-05	52.706	1.24	0.86	27.08
OWID_WRL	World	2021-06-06	62.956	1.351	0.86	27.41
OWID_WRL	World	2021-06-07	46.039	1.087	0.86	27.8
OWID_WRL	World	2021-06-08	39.315	0.983	0.87	28.24
OWID_WRL	World	2021-06-09	41.495	1.015	0.88	28.71
OWID_WRL	World	2021-06-10	45.624	1.678	0.89	29.19
OWID_WRL	World	2021-06-11	51.33	1.393	0.9	29.7
OWID_WRL	World	2021-06-12	49.076	1.385	0.9	30.06
OWID_WRL	World	2021-06-13	59.121	1.384	0.91	30.4
OWID_WRL	World	2021-06-14	44.56	1.296	0.91	30.75
OWID_WRL	World	2021-06-15	37.521	1.018	0.92	31.25
OWID_WRL	World	2021-06-16	38.336	0.973	0.92	31.77
OWID_WRL	World	2021-06-17	46.908	1.198	0.93	32.33
OWID_WRL	World	2021-06-18	49.993	1.168	0.94	32.92
OWID_WRL	World	2021-06-19	45.783	1.063	0.95	33.37
OWID_WRL	World	2021-06-20	54.927	1.173	0.96	33.78
OWID_WRL	World	2021-06-21	42.505	1	0.97	34.32
OWID_WRL	World	2021-06-22	37.779	0.848	0.98	34.87
OWID_WRL	World	2021-06-23	39.678	0.883	0.99	35.42
OWID_WRL	World	2021-06-24	50.652	1.062	0.99	36.02
OWID_WRL	World	2021-06-25	53.819	1.071	1	36.63
OWID_WRL	World	2021-06-26	48.482	1.029	1	37.14
OWID_WRL	World	2021-06-27	57.019	1.139	1.01	37.58
OWID_WRL	World	2021-06-28	45.412	0.913	1.01	38.06
OWID_WRL	World	2021-06-29	40.039	0.824	1.02	38.58
OWID_WRL	World	2021-06-30	42.865	0.818	1.03	39.06
OWID_WRL	World	2021-07-01	50.79	1.03	1.04	39.61
OWID_WRL	World	2021-07-02	48.469	1.104	1.04	40.08
OWID_WRL	World	2021-07-03	51.392	0.999	1.06	40.49
OWID_WRL	World	2021-07-04	67.057	1.04	1.07	40.81
OWID_WRL	World	2021-07-05	46.674	0.926	1.08	41.21
OWID_WRL	World	2021-07-06	42.42	0.836	1.08	41.63
OWID_WRL	World	2021-07-07	46.853	0.9	1.09	42.04
OWID_WRL	World	2021-07-08	57.132	1.046	1.1	42.53
OWID_WRL	World	2021-07-09	56.683	1.017	1.1	42.91
OWID_WRL	World	2021-07-10	75.235	1.048	1.11	43.26
OWID_WRL	World	2021-07-11	86.936	1.075	1.11	43.53
OWID_WRL	World	2021-07-12	51.344	0.963	1.12	43.9
OWID_WRL	World	2021-07-13	48.083	0.977	1.12	44.34
OWID_WRL	World	2021-07-14	55.397	0.926	1.12	44.79
OWID_WRL	World	2021-07-15	62.289	1.02	1.12	45.23
OWID_WRL	World	2021-07-16	65.028	1.061	1.12	45.68
OWID_WRL	World	2021-07-17	64.321	1.032	1.11	46.03
OWID_WRL	World	2021-07-18	105.575	1.081	1.1	46.28
OWID_WRL	World	2021-07-19	53.318	0.943	1.1	46.7
OWID_WRL	World	2021-07-20	51.438	0.902	1.09	47.12
OWID_WRL	World	2021-07-21	56.761	2.498	1.09	47.52
OWID_WRL	World	2021-07-22	59.781	1.036	1.09	48.01
OWID_WRL	World	2021-07-23	63.234	1.078	1.09	48.51
OWID_WRL	World	2021-07-24	64.469	1.105	1.09	48.89
OWID_WRL	World	2021-07-25	121.822	1.168	1.09	49.23
OWID_WRL	World	2021-07-26	56.943	1.078	1.09	49.75
OWID_WRL	World	2021-07-27	55.267	1.091	1.09	50.26
OWID_WRL	World	2021-07-28	66.88	1.076	1.09	50.8
OWID_WRL	World	2021-07-29	73.935	1.268	1.09	51.37
OWID_WRL	World	2021-07-30	74.737	1.215	1.09	51.94
OWID_WRL	World	2021-07-31	72.702	1.181	1.08	52.34
OWID_WRL	World	2021-08-01	119.05	1.253	1.08	52.84
OWID_WRL	World	2021-08-02	62.593	1.127	1.07	53.33
OWID_WRL	World	2021-08-03	60.846	1.137	1.07	54.02
OWID_WRL	World	2021-08-04	71.662	1.157	1.07	54.52
OWID_WRL	World	2021-08-05	76.813	1.259	1.07	55.04
OWID_WRL	World	2021-08-06	83.884	1.313	1.07	55.55
OWID_WRL	World	2021-08-07	78.426	1.258	1.07	55.95
OWID_WRL	World	2021-08-08	120.299	1.39	1.06	56.35
OWID_WRL	World	2021-08-09	69.214	1.231	1.05	56.85
OWID_WRL	World	2021-08-10	63.586	1.119	1.05	57.33
OWID_WRL	World	2021-08-11	70.787	1.142	1.05	57.8
OWID_WRL	World	2021-08-12	79.26	1.29	1.04	58.22
OWID_WRL	World	2021-08-13	82.074	1.262	1.04	58.82
OWID_WRL	World	2021-08-14	82.057	1.248	1.04	59.21
OWID_WRL	World	2021-08-15	119.933	1.447	1.03	59.49
OWID_WRL	World	2021-08-16	68.843	1.241	1.03	60.01
OWID_WRL	World	2021-08-17	65.14	1.063	1.03	60.5
OWID_WRL	World	2021-08-18	72.882	1.139	1.03	60.98
OWID_WRL	World	2021-08-19	85.239	1.347	1.02	61.43
OWID_WRL	World	2021-08-20	84.122	1.351	1.02	61.96
OWID_WRL	World	2021-08-21	81.723	1.237	1.01	62.36
OWID_WRL	World	2021-08-22	118.744	1.578	1.01	62.71
OWID_WRL	World	2021-08-23	66.715	1.231	1.01	63.12
OWID_WRL	World	2021-08-24	65.384	1.064	1.01	63.66
OWID_WRL	World	2021-08-25	73.8	1.217	1.01	64.22
OWID_WRL	World	2021-08-26	82.823	1.34	1	64.73
OWID_WRL	World	2021-08-27	82.833	1.25	0.99	65.4
OWID_WRL	World	2021-08-28	83.356	1.252	0.99	65.86
OWID_WRL	World	2021-08-29	118.094	1.528	0.98	66.34
OWID_WRL	World	2021-08-30	67.62	1.117	0.98	66.76
OWID_WRL	World	2021-08-31	61.289	1.102	0.97	67.27
OWID_WRL	World	2021-09-01	69.273	1.149	0.97	67.84
OWID_WRL	World	2021-09-02	79.649	1.219	0.96	68.25
OWID_WRL	World	2021-09-03	81.21	1.239	0.95	68.63
OWID_WRL	World	2021-09-04	78.03	1.206	0.95	68.96
OWID_WRL	World	2021-09-05	109.752	1.478	0.94	69.36
OWID_WRL	World	2021-09-06	63.127	1.136	0.94	69.68
OWID_WRL	World	2021-09-07	59.768	1.014	0.94	70.12
OWID_WRL	World	2021-09-08	64.315	1.045	0.94	70.61
OWID_WRL	World	2021-09-09	64.885	1.04	0.94	71.08
OWID_WRL	World	2021-09-10	69.318	1.042	0.94	71.47
OWID_WRL	World	2021-09-11	73.192	1.161	0.94	71.91
OWID_WRL	World	2021-09-12	98.327	1.411	0.94	72.33
OWID_WRL	World	2021-09-13	58.254	1.104	0.94	72.72
OWID_WRL	World	2021-09-14	55.212	0.895	0.94	73.06
OWID_WRL	World	2021-09-15	59.74	0.936	0.94	73.45
OWID_WRL	World	2021-09-16	66.098	1.142	0.94	73.84
OWID_WRL	World	2021-09-17	64.739	1.16	0.94	74.19
OWID_WRL	World	2021-09-18	67.087	1.025	0.95	74.69
OWID_WRL	World	2021-09-19	90.926	1.372	0.94	75.03
OWID_WRL	World	2021-09-20	70.022	0.964	0.93	75.35
OWID_WRL	World	2021-09-21	50.346	0.785	0.92	75.71
OWID_WRL	World	2021-09-22	54.107	0.905	0.92	76.07
OWID_WRL	World	2021-09-23	59.044	1.062	0.92	76.47
OWID_WRL	World	2021-09-24	62.128	0.972	0.91	76.84
OWID_WRL	World	2021-09-25	59.795	0.959	0.92	77.12
OWID_WRL	World	2021-09-26	84.328	1.3	0.92	77.34
OWID_WRL	World	2021-09-27	47.569	0.798	0.92	77.92
OWID_WRL	World	2021-09-28	43.23	0.784	0.91	78.27
OWID_WRL	World	2021-09-29	52.373	0.898	0.91	78.66
OWID_WRL	World	2021-09-30	55.311	0.991	0.92	79.03
OWID_WRL	World	2021-10-01	55.256	0.952	0.92	79.33
OWID_WRL	World	2021-10-02	55.108	0.882	0.92	79.61
OWID_WRL	World	2021-10-03	81.21	1.263	0.93	79.88
OWID_WRL	World	2021-10-04	42.169	0.712	0.93	80.16
OWID_WRL	World	2021-10-05	40.56	0.63	0.94	80.58
OWID_WRL	World	2021-10-06	48.976	0.738	0.94	80.87
OWID_WRL	World	2021-10-07	52.328	0.919	0.94	81.17
OWID_WRL	World	2021-10-08	53.226	0.9	0.94	81.57
OWID_WRL	World	2021-10-09	50.63	0.829	0.94	81.84
OWID_WRL	World	2021-10-10	83.001	1.339	0.95	82.19
OWID_WRL	World	2021-10-11	40.398	0.647	0.95	82.44
OWID_WRL	World	2021-10-12	39.131	0.666	0.96	82.72
OWID_WRL	World	2021-10-13	47.123	0.71	0.96	83.01
OWID_WRL	World	2021-10-14	49.187	0.825	0.97	83.3
OWID_WRL	World	2021-10-15	49.114	0.817	0.97	83.56
OWID_WRL	World	2021-10-16	50.149	0.78	0.98	83.75
OWID_WRL	World	2021-10-17	86.455	1.332	0.99	84.07
OWID_WRL	World	2021-10-18	39.379	0.657	1	84.44
OWID_WRL	World	2021-10-19	38.712	0.594	1	84.78
OWID_WRL	World	2021-10-20	48.093	0.84	1	85.23
OWID_WRL	World	2021-10-21	50.284	0.821	1.01	85.56
OWID_WRL	World	2021-10-22	50.319	0.833	1.02	85.91
OWID_WRL	World	2021-10-23	49.391	0.797	1.02	86.25
OWID_WRL	World	2021-10-24	100.659	1.645	1.02	86.54
OWID_WRL	World	2021-10-25	37.085	0.652	1.02	86.8
OWID_WRL	World	2021-10-26	35.098	0.589	1.02	87.15
OWID_WRL	World	2021-10-27	49.404	0.762	1.03	87.45
OWID_WRL	World	2021-10-28	52.802	0.96	1.03	87.82
OWID_WRL	World	2021-10-29	51.195	0.881	1.03	88.3
OWID_WRL	World	2021-10-30	53.921	0.817	1.03	88.71
OWID_WRL	World	2021-10-31	112.501	1.718	1.03	89.12
OWID_WRL	World	2021-11-01	36.906	0.6	1.03	89.42
OWID_WRL	World	2021-11-02	35.881	0.577	1.03	89.77
OWID_WRL	World	2021-11-03	51.723	0.749	1.04	90.13
OWID_WRL	World	2021-11-04	49.304	0.816	1.05	90.54
OWID_WRL	World	2021-11-05	50.832	0.769	1.05	90.97
OWID_WRL	World	2021-11-06	50.361	0.777	1.06	91.33
OWID_WRL	World	2021-11-07	123.524	1.883	1.06	91.67
OWID_WRL	World	2021-11-08	38.264	0.613	1.06	92.03
OWID_WRL	World	2021-11-09	38.192	0.574	1.06	92.45
OWID_WRL	World	2021-11-10	56.541	0.766	1.06	92.94
OWID_WRL	World	2021-11-11	53.414	0.817	1.07	93.36
OWID_WRL	World	2021-11-12	53.286	0.787	1.07	93.79
OWID_WRL	World	2021-11-13	48.53	0.748	1.07	94.21
OWID_WRL	World	2021-11-14	147.612	2.029	1.07	94.54
OWID_WRL	World	2021-11-15	43.989	0.68	1.08	94.86
OWID_WRL	World	2021-11-16	39.354	0.57	1.08	95.21
OWID_WRL	World	2021-11-17	60.976	0.786	1.08	95.61
OWID_WRL	World	2021-11-18	56.316	0.841	1.09	95.99
OWID_WRL	World	2021-11-19	57.157	0.874	1.08	96.42
OWID_WRL	World	2021-11-20	58.643	1.089	1.09	96.85
OWID_WRL	World	2021-11-21	167.793	2.018	1.09	97.19
OWID_WRL	World	2021-11-22	42.796	0.62	1.09	97.54
OWID_WRL	World	2021-11-23	45.053	0.604	1.08	97.93
OWID_WRL	World	2021-11-24	67.467	0.794	1.06	98.42
OWID_WRL	World	2021-11-25	59.385	0.859	1.05	98.76
OWID_WRL	World	2021-11-26	61.208	0.828	1.05	99.25
OWID_WRL	World	2021-11-27	52.937	0.671	1.06	99.61
OWID_WRL	World	2021-11-28	178.408	1.92	1.07	100.11
OWID_WRL	World	2021-11-29	43.828	0.604	1.07	100.53
OWID_WRL	World	2021-11-30	44.38	0.6	1.07	101.05
OWID_WRL	World	2021-12-01	58.489	0.837	1.07	101.58
OWID_WRL	World	2021-12-02	62.895	0.859	1.07	102.07
OWID_WRL	World	2021-12-03	64.421	0.874	1.07	102.5
OWID_WRL	World	2021-12-04	63.2	0.782	1.06	102.97
OWID_WRL	World	2021-12-05	198.21	2.203	1.06	103.36
OWID_WRL	World	2021-12-06	45.096	0.625	1.05	103.73
OWID_WRL	World	2021-12-07	44.546	0.6	1.04	104.11
OWID_WRL	World	2021-12-08	69.685	0.756	1.03	104.57
OWID_WRL	World	2021-12-09	63.476	0.847	1.03	105.06
OWID_WRL	World	2021-12-10	62.748	0.826	1.04	105.47
OWID_WRL	World	2021-12-11	61.792	0.73	1.04	106.02
OWID_WRL	World	2021-12-12	192.465	1.857	1.04	106.39
OWID_WRL	World	2021-12-13	47.04	0.578	1.04	106.76
OWID_WRL	World	2021-12-14	46.596	0.594	1.05	107.27
OWID_WRL	World	2021-12-15	73.086	0.748	1.06	107.76
OWID_WRL	World	2021-12-16	69.944	0.823	1.08	108.17
OWID_WRL	World	2021-12-17	71.612	0.848	1.1	108.74
OWID_WRL	World	2021-12-18	71.059	0.681	1.12	109.17
OWID_WRL	World	2021-12-19	207.394	1.661	1.14	109.6
OWID_WRL	World	2021-12-20	52.3	0.533	1.15	110.15
OWID_WRL	World	2021-12-21	56.888	0.6	1.17	110.63
OWID_WRL	World	2021-12-22	90.269	0.775	1.2	111.06
OWID_WRL	World	2021-12-23	87.542	0.853	1.23	111.6
OWID_WRL	World	2021-12-24	94.197	0.795	1.26	112.05
OWID_WRL	World	2021-12-25	96.613	0.902	1.3	112.38
OWID_WRL	World	2021-12-26	281.727	1.372	1.35	112.7
OWID_WRL	World	2021-12-27	58.764	0.481	1.41	113.11
OWID_WRL	World	2021-12-28	85.499	0.524	1.46	113.69
OWID_WRL	World	2021-12-29	146.071	0.788	1.49	114.19
OWID_WRL	World	2021-12-30	144.585	0.868	1.5	114.66
OWID_WRL	World	2021-12-31	168.96	0.748	1.49	115.09
OWID_WRL	World	2022-01-01	179.203	0.67	1.47	115.32
OWID_WRL	World	2022-01-02	527.047	1.269	1.48	115.54
OWID_WRL	World	2022-01-03	113.553	0.468	1.51	115.94
OWID_WRL	World	2022-01-04	148.321	0.501	1.52	116.42
OWID_WRL	World	2022-01-05	252.215	0.786	1.5	116.86
OWID_WRL	World	2022-01-06	256.417	0.904	1.48	117.3
OWID_WRL	World	2022-01-07	253.098	0.774	1.45	117.78
OWID_WRL	World	2022-01-08	249.363	0.788	1.42	118.06
OWID_WRL	World	2022-01-09	807.627	1.501	1.39	118.46
OWID_WRL	World	2022-01-10	205.425	0.567	1.36	119.18
OWID_WRL	World	2022-01-11	207.055	0.655	1.32	119.63
OWID_WRL	World	2022-01-12	350.363	0.859	1.29	120.05
OWID_WRL	World	2022-01-13	300.236	1.061	1.26	120.5
OWID_WRL	World	2022-01-14	313.216	0.894	1.24	120.84
OWID_WRL	World	2022-01-15	313.064	0.853	1.22	121.17
OWID_WRL	World	2022-01-16	902.671	1.677	1.2	121.54
OWID_WRL	World	2022-01-17	241.047	0.784	1.18	121.93
OWID_WRL	World	2022-01-18	228.215	0.695	1.18	122.22
OWID_WRL	World	2022-01-19	359.582	0.837	1.18	122.71
OWID_WRL	World	2022-01-20	358.944	1.018	1.16	123.04
OWID_WRL	World	2022-01-21	365.995	1.137	1.15	123.46
OWID_WRL	World	2022-01-22	353.052	1.032	1.13	123.74
OWID_WRL	World	2022-01-23	1046.75	1.985	1.11	124.13
OWID_WRL	World	2022-01-24	261.511	0.769	1.09	124.44
OWID_WRL	World	2022-01-25	258.525	0.832	1.07	124.74
OWID_WRL	World	2022-01-26	378.494	1.092	1.05	125.08
OWID_WRL	World	2022-01-27	327.689	1.204	1.04	125.37
OWID_WRL	World	2022-01-28	333.172	1.234	1.02	125.75
OWID_WRL	World	2022-01-29	324.793	1.171	1.01	125.97
OWID_WRL	World	2022-01-30	1053.5	2.203	0.99	126.19
OWID_WRL	World	2022-01-31	241.429	0.987	0.97	126.45
OWID_WRL	World	2022-02-01	219.111	0.881	0.94	126.69
OWID_WRL	World	2022-02-02	308.303	1.279	0.92	126.94
OWID_WRL	World	2022-02-03	287.356	1.462	0.91	127.14
OWID_WRL	World	2022-02-04	273.748	1.332	0.9	127.42
OWID_WRL	World	2022-02-05	281.436	1.261	0.89	127.61
OWID_WRL	World	2022-02-06	887.444	2.312	0.88	128.46
OWID_WRL	World	2022-02-07	199.811	1.028	0.87	128.72
OWID_WRL	World	2022-02-08	186.697	0.948	0.85	129.05
OWID_WRL	World	2022-02-09	245.726	1.314	0.84	129.41
OWID_WRL	World	2022-02-10	240.462	1.466	0.84	129.69
OWID_WRL	World	2022-02-11	227.392	1.316	0.83	130.06
OWID_WRL	World	2022-02-12	209.682	1.2	0.83	130.3
OWID_WRL	World	2022-02-13	685.462	2.309	0.82	130.64
OWID_WRL	World	2022-02-14	160.395	0.881	0.81	130.91
OWID_WRL	World	2022-02-15	157.304	0.837	0.8	131.17
OWID_WRL	World	2022-02-16	195.276	1.182	0.81	131.46
OWID_WRL	World	2022-02-17	193.831	1.273	0.81	131.77
OWID_WRL	World	2022-02-18	190.135	1.271	0.82	132.34
OWID_WRL	World	2022-02-19	179.547	1.138	0.83	132.7
OWID_WRL	World	2022-02-20	537.564	2.145	0.83	132.93
OWID_WRL	World	2022-02-21	137.067	0.788	0.83	133.29
OWID_WRL	World	2022-02-22	147.275	0.788	0.83	133.57
OWID_WRL	World	2022-02-23	167.826	0.877	0.84	133.81
OWID_WRL	World	2022-02-24	172.354	1.2	0.84	134.1
OWID_WRL	World	2022-02-25	168.268	1.088	0.86	134.35
OWID_WRL	World	2022-02-26	156.878	1.06	0.87	134.55
OWID_WRL	World	2022-02-27	435.354	1.653	0.88	134.72
OWID_WRL	World	2022-02-28	137.078	0.84	0.89	135.32
OWID_WRL	World	2022-03-01	134.515	0.681	0.9	135.49
OWID_WRL	World	2022-03-02	156.85	0.921	0.91	135.7
OWID_WRL	World	2022-03-03	165.293	0.845	0.93	135.89
OWID_WRL	World	2022-03-04	156.053	0.983	0.95	136.1
OWID_WRL	World	2022-03-05	154.517	0.791	0.97	136.32
OWID_WRL	World	2022-03-06	461.337	1.444	0.98	136.65
OWID_WRL	World	2022-03-07	120.37	0.599	0.99	136.84
OWID_WRL	World	2022-03-08	149.214	0.585	1	137.04
OWID_WRL	World	2022-03-09	170.747	0.735	1.02	137.26
OWID_WRL	World	2022-03-10	160.462	0.768	1.03	137.47
OWID_WRL	World	2022-03-11	166.334	0.825	1.04	137.66
OWID_WRL	World	2022-03-12	192.896	0.708	1.05	137.84
OWID_WRL	World	2022-03-13	519.751	1.262	1.05	138.01
OWID_WRL	World	2022-03-14	144.592	0.526	1.05	138.18
OWID_WRL	World	2022-03-15	144.242	0.457	1.04	138.4
OWID_WRL	World	2022-03-16	203.557	0.493	1.04	138.6
OWID_WRL	World	2022-03-17	185.652	0.668	1.03	138.78
OWID_WRL	World	2022-03-18	161.626	0.662	1.02	138.96
OWID_WRL	World	2022-03-19	179.725	0.616	1.01	139.1
OWID_WRL	World	2022-03-20	533.427	1.124	0.99	139.23
OWID_WRL	World	2022-03-21	122.981	0.459	0.98	139.38
OWID_WRL	World	2022-03-22	153.334	1.802	0.97	139.59
OWID_WRL	World	2022-03-23	149.171	0.526	0.95	139.8
OWID_WRL	World	2022-03-24	139.814	0.544	0.94	140.03
OWID_WRL	World	2022-03-25	142.614	0.547	0.93	140.2
OWID_WRL	World	2022-03-26	133.424	0.989	0.93	140.36
OWID_WRL	World	2022-03-27	539.726	0.97	0.92	140.54
OWID_WRL	World	2022-03-28	127.091	0.347	0.92	140.82
OWID_WRL	World	2022-03-29	124.58	0.351	0.9	141.08
OWID_WRL	World	2022-03-30	122.551	0.461	0.88	141.31
OWID_WRL	World	2022-03-31	115.288	0.456	0.87	141.73
OWID_WRL	World	2022-04-01	111.743	0.494	0.85	141.84
OWID_WRL	World	2022-04-02	98.47	0.412	0.84	141.91
OWID_WRL	World	2022-04-03	476.651	0.845	0.84	142.05
OWID_WRL	World	2022-04-04	80.107	0.287	0.83	142.23
OWID_WRL	World	2022-04-05	85.119	0.297	0.82	142.38
OWID_WRL	World	2022-04-06	91.907	0.337	0.81	142.5
OWID_WRL	World	2022-04-07	94.535	0.375	0.81	142.66
OWID_WRL	World	2022-04-08	85.747	0.411	0.82	142.81
OWID_WRL	World	2022-04-09	74.775	0.369	0.81	142.93
OWID_WRL	World	2022-04-10	392.171	0.799	0.81	143.13
OWID_WRL	World	2022-04-11	69.975	0.263	0.8	143.25
OWID_WRL	World	2022-04-12	62.885	0.226	0.79	143.4
OWID_WRL	World	2022-04-13	72.473	0.3	0.78	143.54
OWID_WRL	World	2022-04-14	58.164	0.338	0.77	143.65
OWID_WRL	World	2022-04-15	75.888	0.318	0.76	143.73
OWID_WRL	World	2022-04-16	58.877	0.316	0.77	143.78
OWID_WRL	World	2022-04-17	317.428	0.655	0.78	143.91
OWID_WRL	World	2022-04-18	50.798	0.218	0.79	144.04
OWID_WRL	World	2022-04-19	41.694	0.182	0.82	144.19
OWID_WRL	World	2022-04-20	49.135	0.245	0.84	144.29
OWID_WRL	World	2022-04-21	63.431	0.283	0.85	144.44
OWID_WRL	World	2022-04-22	60.127	0.302	0.85	144.55
OWID_WRL	World	2022-04-23	50.823	0.285	0.84	144.67
OWID_WRL	World	2022-04-24	275.063	0.604	0.84	144.8
OWID_WRL	World	2022-04-25	39.732	0.186	0.83	144.91
OWID_WRL	World	2022-04-26	41.734	0.342	0.82	145.15
OWID_WRL	World	2022-04-27	44.695	0.201	0.82	145.28
OWID_WRL	World	2022-04-28	53.636	0.26	0.83	145.4
OWID_WRL	World	2022-04-29	48.631	0.274	0.83	145.54
OWID_WRL	World	2022-04-30	42.174	0.205	0.83	145.63
OWID_WRL	World	2022-05-01	231.406	0.577	0.83	145.78
OWID_WRL	World	2022-05-02	32.971	0.175	0.84	145.84
OWID_WRL	World	2022-05-03	30.829	0.138	0.85	145.91
OWID_WRL	World	2022-05-04	41.384	0.16	0.87	145.97
OWID_WRL	World	2022-05-05	43.466	0.235	0.89	146.03
OWID_WRL	World	2022-05-06	46.065	0.242	0.91	146.19
OWID_WRL	World	2022-05-07	47.226	0.184	0.93	146.26
OWID_WRL	World	2022-05-08	212.626	0.483	0.95	146.36
OWID_WRL	World	2022-05-09	35.343	0.136	0.97	146.43
OWID_WRL	World	2022-05-10	35.482	0.103	0.97	146.52
OWID_WRL	World	2022-05-11	52.407	0.154	0.97	146.63
OWID_WRL	World	2022-05-12	53.068	0.207	0.98	146.72
OWID_WRL	World	2022-05-13	54.527	0.198	0.98	146.86
OWID_WRL	World	2022-05-14	48.451	0.168	0.99	146.93
OWID_WRL	World	2022-05-15	218.4	0.439	0.99	147.04
OWID_WRL	World	2022-05-16	34.715	0.129	0.99	147.12
OWID_WRL	World	2022-05-17	33.888	0.105	0.97	147.18
OWID_WRL	World	2022-05-18	54.313	0.16	0.98	147.28
OWID_WRL	World	2022-05-19	56.63	0.191	0.97	147.36
OWID_WRL	World	2022-05-20	54.639	0.18	0.97	147.48
OWID_WRL	World	2022-05-21	47.717	0.143	0.96	147.54
OWID_WRL	World	2022-05-22	192.346	0.398	0.95	147.75
OWID_WRL	World	2022-05-23	31.581	0.107	0.93	147.81
OWID_WRL	World	2022-05-24	34.732	0.103	0.92	147.93
OWID_WRL	World	2022-05-25	48.017	0.161	0.92	147.99
OWID_WRL	World	2022-05-26	52.247	0.199	0.93	148.08
OWID_WRL	World	2022-05-27	50.703	0.202	0.94	148.18
OWID_WRL	World	2022-05-28	46.799	0.165	0.94	148.25
OWID_WRL	World	2022-05-29	160.617	0.36	0.94	148.33
OWID_WRL	World	2022-05-30	30.202	0.113	0.94	148.41
OWID_WRL	World	2022-05-31	29.112	0.086	0.95	148.49
OWID_WRL	World	2022-06-01	39.024	0.104	0.97	148.56
OWID_WRL	World	2022-06-02	53.844	0.164	0.97	148.61
OWID_WRL	World	2022-06-03	49.185	0.172	0.98	148.72
OWID_WRL	World	2022-06-04	41.652	0.149	0.98	148.79
OWID_WRL	World	2022-06-05	165.702	0.34	0.99	148.93
OWID_WRL	World	2022-06-06	27.032	0.09	0.99	149.02
OWID_WRL	World	2022-06-07	30.574	0.094	1.01	149.26
OWID_WRL	World	2022-06-08	48.195	0.134	1.03	149.42
OWID_WRL	World	2022-06-09	56.068	0.185	1.03	149.5
OWID_WRL	World	2022-06-10	52.239	0.209	1.04	149.6
OWID_WRL	World	2022-06-11	50.709	0.14	1.05	149.66
OWID_WRL	World	2022-06-12	176.843	0.331	1.06	149.77
OWID_WRL	World	2022-06-13	28.827	0.097	1.08	149.84
OWID_WRL	World	2022-06-14	30.394	0.084	1.1	149.93
OWID_WRL	World	2022-06-15	49.195	0.13	1.09	150.03
OWID_WRL	World	2022-06-16	52.696	0.147	1.08	150.12
OWID_WRL	World	2022-06-17	57.309	0.192	1.07	150.21
OWID_WRL	World	2022-06-18	51.318	0.146	1.09	150.31
OWID_WRL	World	2022-06-19	202.958	0.349	1.12	150.47
OWID_WRL	World	2022-06-20	32.038	0.104	1.15	150.53
OWID_WRL	World	2022-06-21	32.27	0.095	1.16	150.61
OWID_WRL	World	2022-06-22	51.734	0.118	1.16	150.69
OWID_WRL	World	2022-06-23	66.043	0.18	1.16	150.81
OWID_WRL	World	2022-06-24	64.132	0.189	1.16	150.9
OWID_WRL	World	2022-06-25	63.391	0.213	1.16	150.96
OWID_WRL	World	2022-06-26	266.094	0.411	1.17	151.31
OWID_WRL	World	2022-06-27	40.69	0.116	1.19	151.41
OWID_WRL	World	2022-06-28	39.031	0.107	1.19	151.48
OWID_WRL	World	2022-06-29	61.246	0.133	1.19	151.6
OWID_WRL	World	2022-06-30	77.81	0.202	1.2	151.67
OWID_WRL	World	2022-07-01	73.989	0.19	1.18	151.73
OWID_WRL	World	2022-07-02	76.267	0.235	1.17	151.79
OWID_WRL	World	2022-07-03	293.014	0.436	1.16	151.92
OWID_WRL	World	2022-07-04	79.472	0.138	1.17	151.98
OWID_WRL	World	2022-07-05	42.064	0.1	1.18	152.05
OWID_WRL	World	2022-07-06	71.684	0.132	1.17	152.11
OWID_WRL	World	2022-07-07	85.047	0.204	1.16	152.21
OWID_WRL	World	2022-07-08	85.649	0.237	1.15	152.3
OWID_WRL	World	2022-07-09	86.887	0.238	1.14	152.34
OWID_WRL	World	2022-07-10	343.792	0.509	1.13	152.55
OWID_WRL	World	2022-07-11	92.858	0.162	1.13	152.66
OWID_WRL	World	2022-07-12	52.871	0.118	1.13	152.76
OWID_WRL	World	2022-07-13	91.236	0.181	1.13	152.84
OWID_WRL	World	2022-07-14	97.345	0.236	1.11	152.93
OWID_WRL	World	2022-07-15	96.875	0.257	1.1	153.04
OWID_WRL	World	2022-07-16	99.618	0.266	1.11	153.09
OWID_WRL	World	2022-07-17	343.893	0.619	1.12	153.23
OWID_WRL	World	2022-07-18	104.633	0.179	1.14	153.33
OWID_WRL	World	2022-07-19	58.084	0.145	1.14	153.55
OWID_WRL	World	2022-07-20	92.233	0.203	1.12	153.63
OWID_WRL	World	2022-07-21	101.606	0.275	1.09	153.83
OWID_WRL	World	2022-07-22	104.345	0.285	1.06	153.94
OWID_WRL	World	2022-07-23	108.394	0.305	1.04	154.03
OWID_WRL	World	2022-07-24	330.092	0.661	1.03	154.21
OWID_WRL	World	2022-07-25	114.496	0.234	1.02	154.28
OWID_WRL	World	2022-07-26	69.741	0.173	1.01	154.4
OWID_WRL	World	2022-07-27	100.397	0.23	1.02	154.51
OWID_WRL	World	2022-07-28	104.214	0.278	1.02	154.61
OWID_WRL	World	2022-07-29	106.61	0.283	1.02	154.72
OWID_WRL	World	2022-07-30	107.437	0.339	1	154.82
OWID_WRL	World	2022-07-31	300.995	0.691	0.99	154.88
OWID_WRL	World	2022-08-01	99.561	0.184	0.98	154.94
OWID_WRL	World	2022-08-02	67.627	0.162	0.98	155.04
OWID_WRL	World	2022-08-03	98.583	0.246	0.99	155.08
OWID_WRL	World	2022-08-04	103.128	0.294	1.01	155.29
OWID_WRL	World	2022-08-05	153.767	0.295	1	155.39
OWID_WRL	World	2022-08-06	103.375	0.326	1	155.46
OWID_WRL	World	2022-08-07	245.261	0.637	0.96	155.65
OWID_WRL	World	2022-08-08	88.699	0.189	0.93	155.73
OWID_WRL	World	2022-08-09	67.228	0.177	0.9	155.82
OWID_WRL	World	2022-08-10	93.021	0.246	0.89	155.88
OWID_WRL	World	2022-08-11	97.552	0.308	0.89	155.94
OWID_WRL	World	2022-08-12	99.945	0.318	0.9	156
OWID_WRL	World	2022-08-13	94.31	0.337	0.91	156.05
OWID_WRL	World	2022-08-14	181.225	0.594	0.92	156.21
OWID_WRL	World	2022-08-15	76.841	0.19	0.92	156.28
OWID_WRL	World	2022-08-16	53.249	0.157	0.92	156.34
OWID_WRL	World	2022-08-17	86.536	0.246	0.91	156.44
OWID_WRL	World	2022-08-18	97.261	0.29	0.91	156.62
OWID_WRL	World	2022-08-19	97.412	0.283	0.91	156.71
OWID_WRL	World	2022-08-20	97.811	0.337	0.92	156.75
OWID_WRL	World	2022-08-21	166.907	0.502	0.91	157.04
OWID_WRL	World	2022-08-22	74.663	0.179	0.9	157.12
OWID_WRL	World	2022-08-23	66.18	0.169	0.89	157.18
OWID_WRL	World	2022-08-24	81.935	0.234	0.88	157.25
OWID_WRL	World	2022-08-25	88.855	0.272	0.88	157.31
OWID_WRL	World	2022-08-26	87.801	0.296	0.88	157.39
OWID_WRL	World	2022-08-27	80.368	0.274	0.88	157.44
OWID_WRL	World	2022-08-28	117.928	0.477	0.87	157.58
OWID_WRL	World	2022-08-29	81.581	0.164	0.86	157.67
OWID_WRL	World	2022-08-30	52.225	0.158	0.86	157.75
OWID_WRL	World	2022-08-31	69.408	0.217	0.85	157.81
OWID_WRL	World	2022-09-01	74.335	0.258	0.86	157.91
OWID_WRL	World	2022-09-02	73.512	0.267	0.87	157.97
OWID_WRL	World	2022-09-03	67.963	0.275	0.87	158.02
OWID_WRL	World	2022-09-04	118.582	0.405	0.87	158.19
OWID_WRL	World	2022-09-05	49.502	0.153	0.86	158.24
OWID_WRL	World	2022-09-06	44.692	0.144	0.85	158.28
OWID_WRL	World	2022-09-07	51.059	0.153	0.85	158.33
OWID_WRL	World	2022-09-08	66.52	0.215	0.85	158.41
OWID_WRL	World	2022-09-09	59.309	0.217	0.87	158.49
OWID_WRL	World	2022-09-10	43.974	0.227	0.89	158.53
OWID_WRL	World	2022-09-11	94.693	0.333	0.9	158.59
OWID_WRL	World	2022-09-12	67.144	0.123	0.9	158.65
OWID_WRL	World	2022-09-13	36.238	0.115	0.9	158.74
OWID_WRL	World	2022-09-14	56.732	0.16	0.91	158.79
OWID_WRL	World	2022-09-15	55.803	0.194	0.91	158.87
OWID_WRL	World	2022-09-16	55.776	0.224	0.91	158.93
OWID_WRL	World	2022-09-17	46.051	0.238	0.91	158.99
OWID_WRL	World	2022-09-18	107.889	0.296	0.92	159.12
OWID_WRL	World	2022-09-19	56.167	0.096	0.92	159.16
OWID_WRL	World	2022-09-20	32.88	0.093	0.92	159.21
OWID_WRL	World	2022-09-21	45.297	0.138	0.93	159.25
OWID_WRL	World	2022-09-22	41.897	0.18	0.95	159.31
OWID_WRL	World	2022-09-23	49.717	0.198	0.96	159.36
OWID_WRL	World	2022-09-24	51.166	0.232	0.96	159.4
OWID_WRL	World	2022-09-25	125.916	0.302	0.97	159.52
OWID_WRL	World	2022-09-26	33.476	0.114	0.97	159.58
OWID_WRL	World	2022-09-27	32.456	0.084	0.98	159.62
OWID_WRL	World	2022-09-28	38.048	0.131	0.98	159.67
OWID_WRL	World	2022-09-29	44.867	0.161	0.98	159.75
OWID_WRL	World	2022-09-30	45.37	0.241	0.97	159.82
OWID_WRL	World	2022-10-01	53.013	0.194	0.97	159.92
OWID_WRL	World	2022-10-02	157.463	0.362	0.98	159.98
OWID_WRL	World	2022-10-03	27.189	0.13	0.98	160.01
OWID_WRL	World	2022-10-04	23.413	0.096	1.01	160.04
OWID_WRL	World	2022-10-05	43.067	0.13	1.03	160.16
OWID_WRL	World	2022-10-06	41.21	0.166	1.03	160.2
OWID_WRL	World	2022-10-07	40.874	0.209	1.04	160.42
OWID_WRL	World	2022-10-08	47.211	0.237	1.03	160.45
OWID_WRL	World	2022-10-09	180.517	0.428	1.03	160.65
OWID_WRL	World	2022-10-10	26.986	0.108	1.04	160.68
OWID_WRL	World	2022-10-11	23.264	0.102	1.04	160.72
OWID_WRL	World	2022-10-12	40.903	0.134	1.02	160.76
OWID_WRL	World	2022-10-13	40.352	0.158	1.01	160.79
OWID_WRL	World	2022-10-14	40.317	0.178	0.99	160.86
OWID_WRL	World	2022-10-15	41.338	0.24	0.99	160.88
OWID_WRL	World	2022-10-16	185.188	0.459	0.99	161.01
OWID_WRL	World	2022-10-17	26.942	0.087	0.99	161.05
OWID_WRL	World	2022-10-18	24.919	0.098	0.98	161.09
OWID_WRL	World	2022-10-19	39.446	0.154	0.96	161.14
OWID_WRL	World	2022-10-20	35.421	0.172	0.95	161.2
OWID_WRL	World	2022-10-21	28.36	0.109	0.93	161.25
OWID_WRL	World	2022-10-22	53.101	0.412	0.92	161.29
OWID_WRL	World	2022-10-23	155.301	0.444	0.92	161.37
OWID_WRL	World	2022-10-24	21.847	0.097	0.93	161.4
OWID_WRL	World	2022-10-25	23.823	0.069	0.93	161.43
OWID_WRL	World	2022-10-26	32.571	0.127	0.91	161.45
OWID_WRL	World	2022-10-27	28.859	0.109	0.89	161.51
OWID_WRL	World	2022-10-28	59.514	0.495	0.89	161.61
OWID_WRL	World	2022-10-29	35.446	0.143	0.89	161.64
OWID_WRL	World	2022-10-30	115.795	0.394	0.9	161.81
OWID_WRL	World	2022-10-31	21.855	0.099	0.89	161.86
OWID_WRL	World	2022-11-01	26.009	0.078	0.9	161.9
OWID_WRL	World	2022-11-02	32.965	0.271	0.92	161.93
OWID_WRL	World	2022-11-03	28.108	0.097	0.95	161.97
OWID_WRL	World	2022-11-04	60.511	0.399	0.97	162.01
OWID_WRL	World	2022-11-05	32.132	0.139	0.98	162.05
OWID_WRL	World	2022-11-06	91.147	0.324	0.99	162.1
OWID_WRL	World	2022-11-07	24.167	0.099	1	162.12
OWID_WRL	World	2022-11-08	31.159	0.072	1.01	162.17
OWID_WRL	World	2022-11-09	24.211	0.108	1.02	162.22
OWID_WRL	World	2022-11-10	33.879	0.115	1.04	162.25
OWID_WRL	World	2022-11-11	67.995	0.387	1.05	162.29
OWID_WRL	World	2022-11-12	43.118	0.133	1.06	162.32
OWID_WRL	World	2022-11-13	87.71	0.318	1.06	162.44
OWID_WRL	World	2022-11-14	28.311	0.082	1.07	162.46
OWID_WRL	World	2022-11-15	35.191	0.085	1.08	162.49
OWID_WRL	World	2022-11-16	39.15	0.094	1.09	162.53
OWID_WRL	World	2022-11-17	34.291	0.096	1.1	162.57
OWID_WRL	World	2022-11-18	58.162	0.373	1.11	162.63
OWID_WRL	World	2022-11-19	48.155	0.13	1.1	162.69
OWID_WRL	World	2022-11-20	93.145	0.317	1.1	162.75
OWID_WRL	World	2022-11-21	31.27	0.085	1.09	162.78
OWID_WRL	World	2022-11-22	34.889	0.078	1.1	162.81
OWID_WRL	World	2022-11-23	44.75	0.099	1.11	162.85
OWID_WRL	World	2022-11-24	32.158	0.114	1.1	162.88
OWID_WRL	World	2022-11-25	63.531	0.448	1.12	162.91
OWID_WRL	World	2022-11-26	56.755	0.134	1.13	162.95
OWID_WRL	World	2022-11-27	110.014	0.321	1.13	163.08
OWID_WRL	World	2022-11-28	32.915	0.091	1.13	163.11
OWID_WRL	World	2022-11-29	38.322	0.104	1.14	163.15
OWID_WRL	World	2022-11-30	45.233	0.112	1.13	163.2
OWID_WRL	World	2022-12-01	43.402	0.102	1.14	163.25
OWID_WRL	World	2022-12-02	80.254	0.338	1.13	163.29
OWID_WRL	World	2022-12-03	42.033	0.159	1.12	163.34
OWID_WRL	World	2022-12-04	123.865	0.364	1.1	163.65
OWID_WRL	World	2022-12-05	37.766	0.108	1.09	163.67
OWID_WRL	World	2022-12-06	38.522	0.105	1.08	163.71
OWID_WRL	World	2022-12-07	48.899	0.14	1.09	163.74
OWID_WRL	World	2022-12-08	52.803	0.138	1.09	163.77
OWID_WRL	World	2022-12-09	104.625	0.53	1.08	163.81
OWID_WRL	World	2022-12-10	100.216	0.17	1.08	163.84
OWID_WRL	World	2022-12-11	196.296	0.417	1.08	164.11
OWID_WRL	World	2022-12-12	134.284	0.13	1.09	164.16
OWID_WRL	World	2022-12-13	154.069	0.128	1.08	164.19
OWID_WRL	World	2022-12-14	185.72	0.17	1.07	164.25
OWID_WRL	World	2022-12-15	196.277	0.135	1.05	164.3
OWID_WRL	World	2022-12-16	334.492	0.533	1.05	164.37
OWID_WRL	World	2022-12-17	338.242	0.212	1.04	164.4
OWID_WRL	World	2022-12-18	535.695	0.536	1.03	164.59
OWID_WRL	World	2022-12-19	547.298	0.18	1.03	164.62
OWID_WRL	World	2022-12-20	682.677	0.178	1.01	164.7
OWID_WRL	World	2022-12-21	794.838	0.23	1	164.76
OWID_WRL	World	2022-12-22	858.155	0.259	0.99	164.83
OWID_WRL	World	2022-12-23	984.764	0.639	0.98	164.87
OWID_WRL	World	2022-12-24	843.659	0.339	0.97	164.9
OWID_WRL	World	2022-12-25	835.982	0.727	0.96	164.92
OWID_WRL	World	2022-12-26	619.794	0.317	0.95	164.95
OWID_WRL	World	2022-12-27	610.265	0.253	0.95	164.99
OWID_WRL	World	2022-12-28	603.471	0.397	0.94	165.02
OWID_WRL	World	2022-12-29	467.878	0.447	0.94	165.04
OWID_WRL	World	2022-12-30	465.104	0.837	0.94	165.06
OWID_WRL	World	2022-12-31	349.075	0.698	0.95	165.08
OWID_WRL	World	2023-01-01	362.169	1.026	0.95	165.09
OWID_WRL	World	2023-01-02	230.423	0.654	0.94	165.19
OWID_WRL	World	2023-01-03	184.372	0.649		165.22
OWID_WRL	World	2023-01-04	204.919	0.699		165.24
OWID_WRL	World	2023-01-05	189.12	0.616		165.26
OWID_WRL	World	2023-01-06	232.099	0.92		165.32
OWID_WRL	World	2023-01-07	159.741	0.671		165.34
OWID_WRL	World	2023-01-08	173.477	0.95		165.47
OWID_WRL	World	2023-01-09	110.546	0.566		165.49
OWID_WRL	World	2023-01-10	75.073	0.54		165.51
OWID_WRL	World	2023-01-11	77.59	0.491		165.57
OWID_WRL	World	2023-01-12	80.311	0.434		165.6
OWID_WRL	World	2023-01-13	128.319	0.955		165.62
OWID_WRL	World	2023-01-14	62.126	0.514		165.63
OWID_WRL	World	2023-01-15	78.907	0.584		165.7
OWID_WRL	World	2023-01-16	46.429	0.346		165.73
OWID_WRL	World	2023-01-17	29.828	0.316		165.76
OWID_WRL	World	2023-01-18	44.259	0.31		165.77
OWID_WRL	World	2023-01-19	40.845	0.295		165.81
OWID_WRL	World	2023-01-20	73.08	0.745		165.82
OWID_WRL	World	2023-01-21	34.331	0.327		165.84
OWID_WRL	World	2023-01-22	46.608	0.426		166.06
OWID_WRL	World	2023-01-23	21.323	0.108		166.07
OWID_WRL	World	2023-01-24	13.518	0.103		166.08
OWID_WRL	World	2023-01-25	22.265	0.403		166.1
OWID_WRL	World	2023-01-26	23.984	0.112		166.12
OWID_WRL	World	2023-01-27	57.594	0.594		166.13
OWID_WRL	World	2023-01-28	20.455	0.137		166.14
OWID_WRL	World	2023-01-29	36.422	0.251		166.21
OWID_WRL	World	2023-01-30	16.924	0.089		166.22
OWID_WRL	World	2023-01-31	11.153	0.098		166.28
OWID_WRL	World	2023-02-01	19.257	0.546		166.29
OWID_WRL	World	2023-02-02	20.346	0.135		166.31
OWID_WRL	World	2023-02-03	50.21	0.543		166.33
OWID_WRL	World	2023-02-04	22.362	0.162		166.33
OWID_WRL	World	2023-02-05	33.502	0.218		166.51
OWID_WRL	World	2023-02-06	13.498	0.079		166.52
OWID_WRL	World	2023-02-07	10.473	0.074		166.53
OWID_WRL	World	2023-02-08	16.858	0.201		166.56
OWID_WRL	World	2023-02-09	16.785	0.082		166.57
OWID_WRL	World	2023-02-10	51.099	0.509		166.58
OWID_WRL	World	2023-02-11	15.639	0.116		166.59
OWID_WRL	World	2023-02-12	32.059	0.195		166.64
OWID_WRL	World	2023-02-13	11.304	0.06		166.65
OWID_WRL	World	2023-02-14	8.991	0.073		166.67
OWID_WRL	World	2023-02-15	16.942	0.094		166.67
OWID_WRL	World	2023-02-16	13.627	0.058		166.68
OWID_WRL	World	2023-02-17	44.856	0.434		166.69
OWID_WRL	World	2023-02-18	12.445	0.139		166.69
OWID_WRL	World	2023-02-19	35.487	0.204		166.81
OWID_WRL	World	2023-02-20	12.299	0.053		166.81
OWID_WRL	World	2023-02-21	8.249	0.062		166.84
OWID_WRL	World	2023-02-22	12.48	0.061		166.85
OWID_WRL	World	2023-02-23	12.224	0.044		166.86
OWID_WRL	World	2023-02-24	11.773	0.089		166.86
OWID_WRL	World	2023-02-25	44.189	0.462		166.87
OWID_WRL	World	2023-02-26	33.308	0.205		166.92
OWID_WRL	World	2023-02-27	15.486	0.053		166.92
OWID_WRL	World	2023-02-28	7.183	0.055		166.93
OWID_WRL	World	2023-03-01	12.465	0.06		166.94
OWID_WRL	World	2023-03-02	12.568	0.056		166.94
OWID_WRL	World	2023-03-03	12.76	0.087		166.98
OWID_WRL	World	2023-03-04	38.418	0.375		166.98
OWID_WRL	World	2023-03-05	30.061	0.186		167.02
OWID_WRL	World	2023-03-06	15.85	0.055		167.03
OWID_WRL	World	2023-03-07	7.288	0.052		167.03
OWID_WRL	World	2023-03-08	10.873	0.057		167.03
OWID_WRL	World	2023-03-09	10.371	0.045		167.03
OWID_WRL	World	2023-03-10	9.67	0.071		167.04
OWID_WRL	World	2023-03-11	31.163	0.326		167.05
OWID_WRL	World	2023-03-12	26.938	0.183		167.08
OWID_WRL	World	2023-03-13	20.03	0.09		167.09
OWID_WRL	World	2023-03-14	7.178	0.057		167.09
OWID_WRL	World	2023-03-15	10.445	0.049		167.09
OWID_WRL	World	2023-03-16	10.108	0.052		167.1
OWID_WRL	World	2023-03-17	8.514	0.058		167.1
OWID_WRL	World	2023-03-18	26.191	0.31		167.11
OWID_WRL	World	2023-03-19	27.712	0.202		167.47
OWID_WRL	World	2023-03-20	19.244	0.093		167.48
OWID_WRL	World	2023-03-21	6.732	0.047		167.48
OWID_WRL	World	2023-03-22	8.511	0.055		167.48
OWID_WRL	World	2023-03-23	8.127	0.052		167.49
OWID_WRL	World	2023-03-24	7.873	0.042		167.51
OWID_WRL	World	2023-03-25	28.303	0.348		167.51
OWID_WRL	World	2023-03-26	25.633	0.196		167.57
OWID_WRL	World	2023-03-27	11.971	0.057		167.57
OWID_WRL	World	2023-03-28	5.61	0.044		167.57
OWID_WRL	World	2023-03-29	7.879	0.042		167.57
OWID_WRL	World	2023-03-30	14.335	15.246		167.61
OWID_WRL	World	2023-03-31	6.24	0.055		167.61
OWID_WRL	World	2023-04-01	29.282	0.282		167.62
OWID_WRL	World	2023-04-02	24.871	0.186		167.74
OWID_WRL	World	2023-04-03	13.335	0.046		167.74
OWID_WRL	World	2023-04-04	4.437	0.029		167.75
OWID_WRL	World	2023-04-05	6.818	0.037		167.75
OWID_WRL	World	2023-04-06	6.8	0.045		167.75
OWID_WRL	World	2023-04-07	6.228	0.03		167.75
OWID_WRL	World	2023-04-08	6.034	0.041		167.76
OWID_WRL	World	2023-04-09	44.207	0.479		167.77
OWID_WRL	World	2023-04-10	11.706	0.048		167.77
OWID_WRL	World	2023-04-11	4.642	0.029		167.78
OWID_WRL	World	2023-04-12	6.487	0.043		167.78
OWID_WRL	World	2023-04-13	7.391	0.038		167.78
OWID_WRL	World	2023-04-14	7.099	0.037		167.78
OWID_WRL	World	2023-04-15	6.714	0.044		167.78
OWID_WRL	World	2023-04-16	43.054	0.415		167.84
OWID_WRL	World	2023-04-17	14.125	0.049		167.84
OWID_WRL	World	2023-04-18	5.608	0.033		167.89
OWID_WRL	World	2023-04-19	7.883	0.037		167.89
OWID_WRL	World	2023-04-20	7.913	0.045		167.89
OWID_WRL	World	2023-04-21	7.514	0.034		167.9
OWID_WRL	World	2023-04-22	7.208	0.032		167.9
OWID_WRL	World	2023-04-23	42.225	0.428		167.9
OWID_WRL	World	2023-04-24	14.045	0.051		167.91
OWID_WRL	World	2023-04-25	5.232	0.034		168.01
OWID_WRL	World	2023-04-26	7.584	0.035		168.02
OWID_WRL	World	2023-04-27	7.202	0.034		168.02
OWID_WRL	World	2023-04-28	7.196	0.036		168.02
OWID_WRL	World	2023-04-29	7.029	0.034		168.02
OWID_WRL	World	2023-04-30	37.598	0.365		168.04
OWID_WRL	World	2023-05-01	13.226	0.043		168.04
OWID_WRL	World	2023-05-02	4.885	0.027		168.36
OWID_WRL	World	2023-05-03	7.078	0.031		168.36
OWID_WRL	World	2023-05-04	7.662	0.035		168.37
OWID_WRL	World	2023-05-05	6.556	0.032		168.37
OWID_WRL	World	2023-05-06	5.079	0.033		168.37
OWID_WRL	World	2023-05-07	31.997	0.401		168.38
OWID_WRL	World	2023-05-08	15.59	0.044		168.38
OWID_WRL	World	2023-05-09	5.87	0.026		168.39
OWID_WRL	World	2023-05-10	5.34	0.027		168.39
OWID_WRL	World	2023-05-11	4.753	0.026		168.39
OWID_WRL	World	2023-05-12	4.949	0.024		168.39
OWID_WRL	World	2023-05-13	4.561	0.03		168.39
OWID_WRL	World	2023-05-14	30.096	0.457		168.41
OWID_WRL	World	2023-05-15	14.339	0.045		168.41
OWID_WRL	World	2023-05-16	4.187	0.017		168.41
OWID_WRL	World	2023-05-17	4.814	0.019		168.41
OWID_WRL	World	2023-05-18	4.332	0.022		168.41
OWID_WRL	World	2023-05-19	3.894	0.017		168.41
OWID_WRL	World	2023-05-20	3.686	0.028		168.41
OWID_WRL	World	2023-05-21	18.587	0.181		168.44
OWID_WRL	World	2023-05-22	15.094	0.05		168.44
OWID_WRL	World	2023-05-23	3.743	0.018		168.45
OWID_WRL	World	2023-05-24	4.369	0.019		168.45
OWID_WRL	World	2023-05-25	3.783	0.026		168.45
OWID_WRL	World	2023-05-26	3.582	0.011		168.45
OWID_WRL	World	2023-05-27	3.42	0.016		168.45
OWID_WRL	World	2023-05-28	14.658	0.191		168.64
OWID_WRL	World	2023-05-29	12.124	0.041		168.65
OWID_WRL	World	2023-05-30	4.886	0.006		168.66
OWID_WRL	World	2023-05-31	3.999	0.011		168.66
OWID_WRL	World	2023-06-01	4.202	0.018		168.66
OWID_WRL	World	2023-06-02	3.258	0.01		168.67
OWID_WRL	World	2023-06-03	1.575	0.019		168.67
OWID_WRL	World	2023-06-04	10.826	0.134		168.72
OWID_WRL	World	2023-06-05	13.005	0.041		168.72
OWID_WRL	World	2023-06-06	0.651	0.01		168.78
OWID_WRL	World	2023-06-07	4.098	0.012		168.78
OWID_WRL	World	2023-06-08	2.823	0.012		168.78
OWID_WRL	World	2023-06-09	3.19	0.01		168.79
OWID_WRL	World	2023-06-10	3.713	0.016		168.79
OWID_WRL	World	2023-06-11	12.082	0.168		168.84
OWID_WRL	World	2023-06-12	10.651	0.025		168.84
OWID_WRL	World	2023-06-13	1.047	0.007		168.84
OWID_WRL	World	2023-06-14	0.592	0.008		168.85
OWID_WRL	World	2023-06-15	0.523	0.008		168.85
OWID_WRL	World	2023-06-16	0.492	0.008		168.85
OWID_WRL	World	2023-06-17	0.86	0.015		168.85
OWID_WRL	World	2023-06-18	7.095	0.084		168.94
OWID_WRL	World	2023-06-19	22.836	0.1		168.94
OWID_WRL	World	2023-06-20	0.303	0.006		168.94
OWID_WRL	World	2023-06-21	0.449	0.006		168.94
OWID_WRL	World	2023-06-22	0.391	0.006		168.95
OWID_WRL	World	2023-06-23	0.566	0.005		168.95
OWID_WRL	World	2023-06-24	0.56	0.01		168.95
OWID_WRL	World	2023-06-25	7.023	0.128		168.96
OWID_WRL	World	2023-06-26	19.324	0.063		168.96
OWID_WRL	World	2023-06-27	0.283	0.007		168.96
OWID_WRL	World	2023-06-28	0.323	0.005		168.96
OWID_WRL	World	2023-06-29	0.305	0.005		168.96
OWID_WRL	World	2023-06-30	0.325	0.002		168.96
OWID_WRL	World	2023-07-01	0.421	0.009		168.96
OWID_WRL	World	2023-07-02	4.485	0.067		169
OWID_WRL	World	2023-07-03	19.854	0.067		169
OWID_WRL	World	2023-07-04	0.851	0.007		169
OWID_WRL	World	2023-07-05	0.224	0.003		169
OWID_WRL	World	2023-07-06	0.224	0.003		169.01
OWID_WRL	World	2023-07-07	0.218	0.003		169.01
OWID_WRL	World	2023-07-08	0.334	0.006		169.01
OWID_WRL	World	2023-07-09	3.711	0.076		169.02
OWID_WRL	World	2023-07-10	23.018	0.025		169.02
OWID_WRL	World	2023-07-11	0.191	0.003		169.03
OWID_WRL	World	2023-07-12	0.246	0.003		169.03
OWID_WRL	World	2023-07-13	0.222	0.001		169.03
OWID_WRL	World	2023-07-14	0.223	0.001		169.03
OWID_WRL	World	2023-07-15	0.275	0.004		169.03
OWID_WRL	World	2023-07-16	3.139	0.048		169.03
OWID_WRL	World	2023-07-17	28.954	0.03		169.03
OWID_WRL	World	2023-07-18	0.185	0.004		169.03
OWID_WRL	World	2023-07-19	0.255	0.002		169.03
OWID_WRL	World	2023-07-20	0.24	0.001		169.03
OWID_WRL	World	2023-07-21	0.246	0		169.03
OWID_WRL	World	2023-07-22	0.318	0.002		169.03
OWID_WRL	World	2023-07-23	3.67	0.041		169.2
OWID_WRL	World	2023-07-24	36.393	0.017		169.2
OWID_WRL	World	2023-07-25	0.617	0.008		169.22
OWID_WRL	World	2023-07-26	0.283	0.001		169.22
OWID_WRL	World	2023-07-27	0.265	0.004		169.22
OWID_WRL	World	2023-07-28	0.266	0.001		169.22
OWID_WRL	World	2023-07-29	0.332	0.002		169.22
OWID_WRL	World	2023-07-30	3.389	0.052		169.22
OWID_WRL	World	2023-07-31	40.92	0.026		169.22
OWID_WRL	World	2023-08-01	42.309	0.033		169.22
OWID_WRL	World	2023-08-02	0.356	0.001		169.22
OWID_WRL	World	2023-08-03	0.264	0.004		169.22
OWID_WRL	World	2023-08-04	0.221	0.002		169.22
OWID_WRL	World	2023-08-05	0.078	0.002		169.22
OWID_WRL	World	2023-08-06	0.235	0.004		169.22
OWID_WRL	World	2023-08-07	3.132	0		169.23
OWID_WRL	World	2023-08-08	0.435	0.007		169.23
OWID_WRL	World	2023-08-09	0	0		169.23
OWID_WRL	World	2023-08-10				169.23
OWID_WRL	World	2023-08-11				169.23
OWID_WRL	World	2023-08-12				169.23

## Sheet: Supplementary File 1 g
Supplementary File 1 g | Amino acid substitution of sublineages
Delta (n=1,772)			Omicron BA.5		Omicron BQ.1
No.	Amino acid substitution	Percentage	Amino acid substitution	Percentage	Amino acid substitution	Percentage
1	L452R,T478K	10.1	S477N,T478K,E484A,F486V,Q498R,N501Y,Y505H	2.21	N440K,K444T,L452R,N460K,S477N,T478K,E484A,F486V,Q498R,N501Y,Y505H	5.47
2	T478K	6.6	N440K,L452R,S477N,T478K,E484A,F486V,Q498R,N501Y,Y505H	2.21	S477N,T478K,E484A,F486V,Q498R,N501Y,Y505H	4.17
3	L452R	6.26	L452R,S477N,T478K,E484A,F486V,Q498R,N501Y,Y505H	2.1	N440K,K444T,L452R,S477N,T478K,E484A,F486V,Q498R,N501Y,Y505H	3.39
4	G446V,L452R,T478K	4.46	N440K,L452R	1.75	N440K,K444T,L452R,N460K	3.26
5	L452R,T478K,E484Q	2.43	N440K,L452R,S477N,T478K,E484A,F486V	1.75	N440K,K444T,L452R,N460K,S477N,T478K,E484A,F486V	3.26
6	L452R,S477I,T478K	2.43	N440K,L452R,S477N,T478K,E484A,F486V,Q498R,N501Y	1.63	N440K,K444T,L452R,N460K,S477N,T478K,E484A,F486V,S494P,Q498R,N501Y,Y505H	2.21
7	L452R,T478K,S494L	2.2	N440K,S477N,T478K,E484A,F486V,Q498R,N501Y,Y505H	1.51	K444T,L452R,N460K,S477N,T478K,E484A,F486V,Q498R,N501Y,Y505H	2.21
8	L452R,T478K,P479S	1.98	N440K,L452R,S477N,T478K,E484A,F486V,N501Y,Y505H	1.51	N440K,K444T,L452R,N460K,S477N,T478K,E484A,F486V,Q498R,N501Y	2.21
9	L452R,T478K,V483F	1.86	L452R	1.51	L452R,N460K	2.08
10	L452R,T478K,S494P	1.86	L452R,S477N,T478K,E484A,F486V,N501Y,Y505H	1.4	N440K,K444T,L452R,N460K,T478K,E484A,F486V,Q498R,N501Y,Y505H	1.95
11	L452R,L455F,T478K	1.75	N440K,K444N,L452R,S477N,T478K,E484A,F486V,Q498R,N501Y,Y505H	1.28	N440K,L452R,S477N,T478K,E484A,F486V,Q498R,N501Y,Y505H	1.95
12	L452R,G476S,T478K	1.69	N440K,L452R,Y505H	1.28	N440K,K444T,S477N,T478K,E484A,F486V,Q498R,N501Y,Y505H	1.95
13	L452R,T478K,E484K	1.3	S477N,T478K,E484A,F486V,Q498R,N501Y	1.28	N440K,K444T,L452R,N460K,S477N,T478K,E484A,Q498R,N501Y,Y505H	1.69
14	K444N,L452R,T478K	1.24	E484A,F486V,Q498R,N501Y,Y505H	1.16	N460K,S477N,T478K,E484A,F486V,Q498R,N501Y,Y505H	1.56
15	L452R,P463S,T478K	1.24	L452R,Y505H	1.16	N440K,K444T,L452R,N460K,Y505H	1.56
16	L452R,T478K,F490S	1.24	Q498R,N501Y,Y505H	1.05	N440K,K444T,L452R,N460K,S477N,T478K,F486V,Q498R,N501Y,Y505H	1.43
17	L452R,T470I,T478K	1.19	T478K,E484A,F486V,Q498R,N501Y,Y505H	1.05	N440K,L452R,N460K,S477N,T478K,E484A,F486V,Q498R,N501Y,Y505H	1.43
18	L452R,T478K,P479L	1.13	N440K,K444M,L452R,S477N,T478K,E484A,F486V,Q498R,N501Y,Y505H	1.05	L452R,N460K,S477N,T478K,E484A,F486V,Q498R,N501Y,Y505H	1.3
19	L452R,T478K,E484A	1.13	Y505H	1.05	N440K,K444T,V445A,L452R,N460K,S477N,T478K,E484A,F486V,Q498R,N501Y,Y505H	1.3
20	L452R,T478K,F490L	1.13	Other	72.06	L452R,N460K,Y505H	1.3
21	G446S,L452R,T478K	1.02			N440K,K444T,L452R,N460K,S477N,E484A,F486V,Q498R,N501Y,Y505H	1.3
22	Other	45.76			N440K,K444T,L452R,N460K,E484A,F486V,Q498R,N501Y,Y505H	1.04
23					E484A,F486V,Q498R,N501Y,Y505H	1.04
24					N440K,K444T,L452R,N460K,S477N,T478K,E484V,F486V,Q498R,N501Y,Y505H	1.04
25					N440K,K444T,L452R,N460K,S477N,T478R,E484A,F486V,Q498R,N501Y,Y505H	1.04
26					N440K,K444T,L452R,N460K,S477N,T478K,P479L,E484A,F486V,Q498R,N501Y,Y505H	1.04
27					Other	47.78

## Sheet: Supplementary File 1 h
Supplementary File 1 h | Symptomatic information (symptomatic and asymptomatic) from GISAID
Virus name	Accession ID	Collection date	Location	Host	Additional location information	Sampling strategy	Gender	Patient age	Patient status	Last vaccinated	Passage	Specimen	Additional host information	Lineage	Clade	AA Substitutions	lineage_type
hCoV-19/French Guiana/IPG2021759/2021	EPI_ISL_3129971	2021-07-22	South America / French Guiana / Kourou	Human	Travel history: Europe / France		Female	48	Symptomatic		Original	Nasopharyngeal swab		AY.34	GK	P681R,Y144del,Q677H,T19R,D950N,T478K,V70del,D614G,L452R)	delta
hCoV-19/Puerto Rico/PR-CDC-S519/2021	EPI_ISL_3132192	2021-06-28	North America / Puerto Rico	Human		Baseline surveillance	unknown	unknown	Symptomatic		Original	Nasopharyngeal swab		AY.3	GK	G142D,P681R,R158del,F157del,T19R,D950N,E156G,T478K,D614G,L452R)	delta
hCoV-19/Puerto Rico/PR-CDC-S520/2021	EPI_ISL_3132193	2021-06-28	North America / Puerto Rico	Human		Baseline surveillance	unknown	unknown	Symptomatic		Original	Nasopharyngeal swab		AY.20	GK	T95I,G142D,P681R,R158del,F157del,T19R,D950N,E156G,T478K,D614G,V1104L,L452R)	delta
hCoV-19/Puerto Rico/PR-CDC-S522/2021	EPI_ISL_3132195	2021-06-29	North America / Puerto Rico	Human		Baseline surveillance	unknown	unknown	Symptomatic		Original	Nasopharyngeal swab		AY.20	GK	P681R,R158del,F157del,T19R,D950N,E156G,L1203F,T478K,D614G,V1104L,L452R)	delta
hCoV-19/Puerto Rico/PR-CDC-S523/2021	EPI_ISL_3132196	2021-07-12	North America / Puerto Rico	Human		Baseline surveillance	unknown	unknown	Symptomatic		Original	Nasopharyngeal swab		AY.47	GK	V289I,P681R,R158del,F157del,T19R,A222V,D950N,E156G,T478K,D614G,L452R)	delta
hCoV-19/Canada/NL-NML-97348/2021	EPI_ISL_3150972	2021-06-08	North America / Canada / Newfoundland and Labrador	Human		Cluster/Outbreak investigation	Female	46	Symptomatic		Original	Nasopharyngeal swab		AY.10	GK	G142D,P681R,R158del,F157del,T19R,A222V,D950N,E156G,T478K,D614G,L452R)	delta
hCoV-19/Canada/NL-NML-97346/2021	EPI_ISL_3150970	2021-06-06	North America / Canada / Newfoundland and Labrador	Human		Cluster/Outbreak investigation	Female	14	Asymptomatic		Original	Nasopharyngeal swab		AY.10	GK	G142D,P681R,R158del,F157del,T19R,A222V,D950N,E156G,T478K,D614G,L452R)	delta
hCoV-19/Canada/NL-NML-97359/2021	EPI_ISL_3150983	2021-06-14	North America / Canada / Newfoundland and Labrador	Human		Cluster/Outbreak investigation	Female	62	Asymptomatic		Original	Nasopharyngeal swab		AY.10	GK	G142D,P681R,R158del,F157del,T19R,A222V,E156G,T478K,D614G,L452R)	delta
hCoV-19/Canada/NL-NML-97352/2021	EPI_ISL_3150976	2021-06-08	North America / Canada / Newfoundland and Labrador	Human		Cluster/Outbreak investigation	Female	7	Asymptomatic		Original	Nasopharyngeal swab		AY.10	GK	G142D,P681R,R158del,F157del,T19R,A222V,D950N,E156G,T478K,D614G,L452R)	delta
hCoV-19/Mexico/SIN-CIAD-MZT-S7378/2021	EPI_ISL_3149327	2021-07-09	North America / Mexico / Sinaloa / Mazatlan	Human		Non-sentinel-surveillance (hospital)	Male	28	Symptomatic - Ambulatory	Complete Pfizer	Original	Oropharyngeal swab		AY.26	GK	N1074S,G142D,P681R,R158del,F157del,T19R,A222V,D950N,E156G,T478K,D614G,L452R)	delta
hCoV-19/Mexico/SIN-CIAD-MZT-HJ2404/2021	EPI_ISL_3149326	2021-07-09	North America / Mexico / Sinaloa / Mazatlan	Human		Non-sentinel-surveillance (hospital)	Male	26	Symptomatic - Ambulatory	Complete AstraZeneca	Original	Oropharyngeal swab		AY.26	GK	N1074S,G142D,P681R,R158del,F157del,T19R,A222V,D950N,E156G,T478K,D614G,L452R)	delta
hCoV-19/Mexico/SIN-CIAD-MZT-S7399/2021	EPI_ISL_3149323	2021-07-12	North America / Mexico / Sinaloa / Mazatlan	Human		Non-sentinel-surveillance (hospital)	Female	48	Symptomatic - Ambulatory	Partial AstraZeneca	Original	Oropharyngeal swab		AY.26	GK	N1074S,G142D,P681R,R158del,F157del,T19R,A222V,D950N,E156G,T478K,D614G,L452R)	delta
hCoV-19/Mexico/SIN-CIAD-MZT-ID2949/2021	EPI_ISL_3149329	2021-07-13	North America / Mexico / Sinaloa / Mazatlan	Human		Non-sentinel-surveillance (hospital)	Female	47	Symptomatic - Ambulatory	Complete Pfizer	Original	Oropharyngeal swab		AY.26	GK	N1074S,G142D,P681R,R158del,F157del,T19R,A222V,D950N,E156G,T478K,D614G,L452R)	delta
hCoV-19/Mexico/SIN-CIAD-MZT-ID2928/2021	EPI_ISL_3149328	2021-07-12	North America / Mexico / Sinaloa / Mazatlan	Human		Non-sentinel-surveillance (hospital)	Female	62	Symptomatic - Ambulatory	Partial AstraZeneca	Original	Oropharyngeal swab		AY.26	GK	N1074S,G142D,P681R,R158del,F157del,T19R,A222V,D950N,E156G,L822F,T478K,D614G,L452R	delta
hCoV-19/Mexico/SIN-CIAD-MZT-S7450/2021	EPI_ISL_3149332	2021-07-14	North America / Mexico / Sinaloa / Mazatlan	Human		Non-sentinel-surveillance (hospital)	Male	54	Symptomatic - Ambulatory	Complete CanSino	Original	Oropharyngeal swab		AY.26	GK	N1074S,G142D,P681R,R158del,F157del,T19R,A222V,D950N,E156G,T478K,D614G,L452R)	delta
hCoV-19/Mexico/SIN-CIAD-MZT-HJ2543/2021	EPI_ISL_3149331	2021-07-13	North America / Mexico / Sinaloa / Mazatlan	Human		Non-sentinel-surveillance (hospital)	Female	11	Asymptomatic - Ambulatory	Not vaccinated	Original	Oropharyngeal swab		AY.26	GK	N1074S,G142D,P681R,R158del,F157del,T19R,A222V,D950N,E156G,T478K,D614G,C1253F,L452R)	delta
hCoV-19/Mexico/SIN-CIAD-MZT-HJ2529/2021	EPI_ISL_3149330	2021-07-13	North America / Mexico / Sinaloa / Mazatlan	Human		Non-sentinel-surveillance (hospital)	Female	16	Asymptomatic - Ambulatory	Not vaccinated	Original	Oropharyngeal swab		AY.26	GK	V1264L,N1074S,G142D,P681R,R158del,F157del,T19R,A222V,D950N,E156G,T478K,D614G,C1253F,L452R)	delta
hCoV-19/Reunion/PIMIT_16149/2021	EPI_ISL_3154287	2021-07-16	Africa / Reunion	Human			unknown	17	Asymptomatic		Original			AY.40	GK	H1101Y,D574Y,P681R,R158del,F157del,T19R,D950N,E156G,T478K,D614G,L452R)	delta
hCoV-19/Mexico/SIN-CIAD-MZT_S7303/2021	EPI_ISL_2987722	2021-07-07	North America / Mexico / Sinaloa / Mazatlan	Human		Non-sentinel-surveillance (hospital)	Female	40	Symptomatic - Ambulatory	Partial CanSino	Original	Oropharyngeal swab		AY.26	GK	N1074S,G142D,P681R,R158del,F157del,T19R,A222V,D950N,E156G,T478K,D614G,L452R,C1253F)	delta
hCoV-19/Italy/APU-IZSPB-1763PT/2021	EPI_ISL_3098822	2021-07-14	Europe / Italy / Apulia / Lecce / Lecce	Human			Female	37	Paucisymptomatic		Original	Nasopharyngeal Swab		AY.122	GK	D950N,P681R,D614G,T19R)	delta
hCoV-19/Mexico/SIN-CIAD-MZT_HJ2159/2021	EPI_ISL_2987709	2021-07-05	North America / Mexico / Sinaloa / Mazatlan	Human		Non-sentinel-surveillance (hospital)	Male	35	Symptomatic - Ambulatory	Partial Sinovac	Original	Oropharyngeal swab		AY.26	GK	N1074S,G142D,P681R,R158del,F157del,T19R,A222V,D950N,E156G,T478K,D614G,L452R)	delta
hCoV-19/Mexico/SIN-CIAD-MZT_HJ2140/2021	EPI_ISL_2987706	2021-07-05	North America / Mexico / Sinaloa / Mazatlan	Human		Non-sentinel-surveillance (hospital)	Female	32	Asymptomatic - Ambulatory	Partial AstraZeneca	Original	Oropharyngeal swab		AY.26	GK	N1074S,G142D,P681R,R158del,F157del,T19R,A222V,D950N,E156G,T478K,D614G,L452R)	delta
hCoV-19/Mexico/SIN-CIAD-MZT_HJ2278/2021	EPI_ISL_2987710	2021-07-07	North America / Mexico / Sinaloa / Mazatlan	Human		Non-sentinel-surveillance (hospital)	Female	26	Asymptomatic - Ambulatory	Partial AstraZeneca	Original	Oropharyngeal swab		AY.26	GK	N1074S,G142D,P681R,R158del,F157del,T19R,A222V,D950N,E156G,T478K,D614G,L452R)	delta
hCoV-19/Mexico/SIN-CIAD-MZT_HJ1830/2021	EPI_ISL_2987699	2021-06-17	North America / Mexico / Sinaloa / Mazatlan	Human		Non-sentinel-surveillance (hospital)	Male	43	Symptomatic		Original	Oropharyngeal swab		AY.26	GK	N1074S,G142D,P681R,R158del,F157del,T19R,A222V,D950N,E156G,T478K,D614G,C1253F,L452R)	delta
hCoV-19/India/MH-NEERI-ONT-CIA5564/2021	EPI_ISL_3060903	2021-06-22	Asia / India / Maharasthra / Nagpur	Human			Female	47	Asymptomatic		Original	Nasopharyngeal and oropharyngeal swab		AY.75	GK	D950N,T478K,P681R,D614G,L452R)	delta
hCoV-19/India/MH-NEERI-ONT-CIA5848/2021	EPI_ISL_3060912	2021-06-22	Asia / India / Maharashtra / Nagpur	Human			Female	27	Symptomatic		Original	Nasopharyngeal and oropharyngeal swab		AY.112	GK	I870V,P681R,S939F,T19R,T478K,D614G,L452R	delta
hCoV-19/India/MH-NEERI-ONT-CIA5565/2021	EPI_ISL_3060904	2021-06-22	Asia / India / Maharasthra / Nagpur	Human			Female	16	Asymptomatic		Original	Nasopharyngeal and oropharyngeal swab		AY.75	GK	T478K,P681R,D614G,L452R	delta
hCoV-19/India/MH-NEERI-ONT-CIA5561/2021	EPI_ISL_3060900	2021-06-10	Asia / India / Maharasthra / Nagpur	Human			Male	5	Asymptomatic		Original	Nasopharyngeal and oropharyngeal swab		AY.122	GK	D950N,P681R,D614G	delta
hCoV-19/Italy/APU-IZSPB-1866PT/2021	EPI_ISL_3098868	2021-07-20	Europe / Italy / Apulia / Bari / Bari	Human			Male	28	Paucisymptomatic		Original	Nasopharyngeal Swab		AY.116	GK	T95I,P681R,T19R,T478K,D614G,L452R	delta
hCoV-19/Italy/APU-IZSPB-1870PT/2021	EPI_ISL_3098872	2021-07-20	Europe / Italy / Apulia / Bari / Bari	Human			Male	41	Paucisymptomatic		Original	Nasopharyngeal Swab		AY.116	GK	T95I,P681R,T19R,T478K,D614G,L452R	delta
hCoV-19/Italy/APU-IZSPB-1869PT/2021	EPI_ISL_3098871	2021-07-20	Europe / Italy / Apulia / Bari / Bari	Human			Male	29	Paucisymptomatic		Original	Nasopharyngeal Swab		AY.98.1	GK	P251L,P681R,T19R,T478K,D614G,L452R	delta
hCoV-19/Italy/APU-IZSPB-1868PT/2021	EPI_ISL_3098870	2021-07-20	Europe / Italy / Apulia / Bari / Bari	Human			Male	17	Paucisymptomatic		Original	Nasopharyngeal Swab		AY.112	GK	T95I,P681R,T19R,G1219V,T478K,D614G,L452R	delta
hCoV-19/Italy/APU-IZSPB-1877PT/2021	EPI_ISL_3098873	2021-07-20	Europe / Italy / Apulia / Taranto / Taranto	Human			Male	16	Paucisymptomatic		Original	Nasopharyngeal Swab		AY.42	GK	T95I,P681R,R158del,F157del,T19R,E156G,T478K,D614G,L452R	delta
hCoV-19/Italy/APU-IZSPB-1865PT/2021	EPI_ISL_3098867	2021-07-20	Europe / Italy / Apulia / Bari / Bari	Human			Male	22	Asymptomatic		Original	Nasopharyngeal Swab		AY.43	GK	P681R,T19R,T478K,D614G,L452R	delta
hCoV-19/Italy/APU-IZSPB-1760PT/2021	EPI_ISL_3098820	2021-07-13	Europe / Italy / Apulia / Lecce / Lecce	Human			Female	23	Asymptomatic		Original	Nasopharyngeal Swab		AY.43	GK	P681R,T19R,T478K,D614G,L452R	delta
hCoV-19/Italy/APU-IZSPB-1762PT/2021	EPI_ISL_3098821	2021-07-15	Europe / Italy / Apulia / Lecce / Lecce	Human			Female	44	Paucisymptomatic		Original	Nasopharyngeal Swab		AY.43	GK	P681R,T19R,T478K,D614G,L452R	delta
hCoV-19/Mexico/SIN-CIAD-MZT_HJ1995/2021	EPI_ISL_2987705	2021-06-28	North America / Mexico / Sinaloa / Mazatlan	Human		Non-sentinel-surveillance (hospital)	Female	29	Asymptomatic - Ambulatory	Partial AstraZeneca	Original	Oropharyngeal swab		AY.26	GK	N1074S,G142D,P681R,R158del,F157del,T19R,A222V,D950N,E156G,T478K,D614G,L452R)	delta
hCoV-19/Mexico/SIN-CIAD-MZT_HJ2145/2021	EPI_ISL_2987708	2021-07-05	North America / Mexico / Sinaloa / Mazatlan	Human		Non-sentinel-surveillance (hospital)	Female	27	Symptomatic - Ambulatory	Partial AstraZeneca	Original	Oropharyngeal swab		AY.26	GK	N1074S,G142D,P681R,R158del,F157del,T19R,A222V,D950N,E156G,T478K,D614G,L452R)	delta
hCoV-19/India/MH-NEERI-ONT-CIA5841/2021	EPI_ISL_3060906	2021-06-07	Asia / India / Maharashtra / Nagpur	Human			Female	88	Asymptomatic		Original	Nasopharyngeal and oropharyngeal swab		AY.122	GK	P681R,T19R,T478K,D614G,L452R)	delta
hCoV-19/India/MH-NEERI-ONT-CIA5563/2021	EPI_ISL_3060902	2021-06-22	Asia / India / Maharasthra / Nagpur	Human			Female	27	Asymptomatic		Original	Nasopharyngeal and oropharyngeal swab		AY.75	GK	D950N,D574Y,T478K,P681R,D614G,L452R)	delta
hCoV-19/India/MH-NEERI-ONT-CIA5842/2021	EPI_ISL_3060907	2021-06-14	Asia / India / Maharasthra / Nagpur	Human			Male	21	Asymptomatic		Original	Nasopharyngeal and oropharyngeal swab		AY.122	GK	I870V,P681R,S939F,D950N,T478K,D614G,L452R)	delta
hCoV-19/India/MH-NEERI-ONT-CIA5843/2021	EPI_ISL_3060908	2021-06-19	Asia / India / Maharashtra / Nagpur	Human			Female	60	Asymptomatic		Original	Nasopharyngeal and oropharyngeal swab		AY.122	GK	S943T,I870V,P681R,S939F,T19R,D950N,T478K,D614G,L452R	delta
hCoV-19/India/MH-NEERI-ONT-CIA5849/2021	EPI_ISL_3060913	2021-06-22	Asia / India / Maharasthra / Nagpur	Human			Female	42	Asymptomatic		Original	Nasopharyngeal and oropharyngeal swab		AY.122	GK	I870V,P681R,S939F,T478K,D614G,L452R	delta
hCoV-19/India/MH-NEERI-ONT-CIA5845/2021	EPI_ISL_3060910	2021-06-07	Asia / India / Maharashtra / Nagpur	Human			Male	50	Asymptomatic		Original	Nasopharyngeal and oropharyngeal swab		AY.122	GK	P681R,S939F,T19R,T478K,D614G,L452R	delta
hCoV-19/India/MH-NEERI-ONT-CIA5846/2021	EPI_ISL_3060911	2021-06-22	Asia / India / Maharashtra / Nagpur	Human			Male	17	Asymptomatic		Original	Nasopharyngeal and oropharyngeal swab		AY.122	GK	P681R,S939F,T19R,T478K,D614G,L452R	delta
hCoV-19/Italy/APU-IZSPB-1881PT/2021	EPI_ISL_3098877	2021-07-20	Europe / Italy / Apulia / Taranto / Taranto	Human			Male	15	Asymptomatic		Original	Nasopharyngeal Swab		AY.75	GK	P681R,T19R,Q613H,A222V,R847K,T478K,D614G,L452R)	delta
hCoV-19/Puerto Rico/PR-CDC-S518/2021	EPI_ISL_3132191	2021-06-27	North America / Puerto Rico	Human		Baseline surveillance	unknown	unknown	Symptomatic		Original	Nasopharyngeal swab		AY.20	GK	T95I,G142D,P681R,R158del,F157del,T19R,D950N,E156G,T478K,D614G,V1104L,L452R)	delta
hCoV-19/Puerto Rico/PR-CDC-S521/2021	EPI_ISL_3132194	2021-06-29	North America / Puerto Rico	Human		Baseline surveillance	unknown	unknown	Symptomatic		Original	Nasopharyngeal swab		AY.20	GK	T95I,P681R,R158del,F157del,T19R,D950N,E156G,L1203F,T478K,D614G,V1104L,L452R)	delta
hCoV-19/French Guiana/IPG2021735/2021	EPI_ISL_3129955	2021-07-21	South America / French Guiana / Cayenne	Human			Female	20	Asymptomatic		Original	Nasopharyngeal swab		AY.43	GK	P681R,R158del,F157del,T19R,D950N,E156G,T478K,D614G,L452R	delta
hCoV-19/Mexico/SIN-CIAD-MZT-HJ2337/2021	EPI_ISL_3149325	2021-07-08	North America / Mexico / Sinaloa / Mazatlan	Human		Non-sentinel-surveillance (hospital)	Male	56	Symptomatic - Ambulatory	Complete Sinovac	Original	Oropharyngeal swab		AY.26	GK	N1074S,G142D,P681R,R158del,F157del,T19R,A222V,D950N,E156G,T478K,D614G,C1253F,L452R)	delta
hCoV-19/Canada/NL-NML-97344/2021	EPI_ISL_3150968	2021-06-06	North America / Canada / Newfoundland and Labrador	Human		Cluster/Outbreak investigation	Male	19	Symptomatic		Original	Nasopharyngeal swab		AY.10	GK	G142D,P681R,R158del,F157del,T19R,A222V,D950N,E156G,T478K,D614G,L452R)	delta
hCoV-19/Canada/NL-NML-97350/2021	EPI_ISL_3150974	2021-06-08	North America / Canada / Newfoundland and Labrador	Human		Cluster/Outbreak investigation	Male	7	Asymptomatic		Original	Nasopharyngeal swab		AY.10	GK	G142D,P681R,R158del,F157del,T19R,A222V,D950N,E156G,T478K,D614G,L452R)	delta
hCoV-19/Canada/NL-NML-97351/2021	EPI_ISL_3150975	2021-06-08	North America / Canada / Newfoundland and Labrador	Human		Cluster/Outbreak investigation	Male	11	Asymptomatic		Original	Nasopharyngeal swab		AY.10	GK	G142D,P681R,R158del,F157del,T19R,A222V,D950N,E156G,T478K,D614G,L452R)	delta
hCoV-19/Canada/NL-NML-97354/2021	EPI_ISL_3150978	2021-06-09	North America / Canada / Newfoundland and Labrador	Human		Cluster/Outbreak investigation	Female	13	Symptomatic		Original	Nasopharyngeal swab		AY.10	GK	G142D,P681R,R158del,F157del,T19R,A222V,D950N,E156G,T478K,D614G,L452R)	delta
hCoV-19/Reunion/PIMIT_16128/2021	EPI_ISL_3154030	2021-07-16	Africa / Reunion	Human			unknown	17	Asymptomatic		Original			AY.40	GK	H1101Y,D574Y,P681R,R158del,F157del,T19R,D950N,E156G,T478K,D614G,L452R)	delta
hCoV-19/Canada/NL-NML-97349/2021	EPI_ISL_3150973	2021-06-08	North America / Canada / Newfoundland and Labrador	Human		Cluster/Outbreak investigation	Male	32	Symptomatic		Original	Nasopharyngeal swab		AY.10	GK	G142D,P681R,R158del,F157del,T19R,A222V,D950N,E156G,T478K,D614G,L452R)	delta
hCoV-19/Canada/NL-NML-97353/2021	EPI_ISL_3150977	2021-06-09	North America / Canada / Newfoundland and Labrador	Human		Cluster/Outbreak investigation	Male	71	Asymptomatic		Original	Nasopharyngeal swab		AY.10	GK	G142D,P681R,R158del,F157del,T19R,A222V,D950N,E156G,T478K,D614G,L452R)	delta
hCoV-19/Canada/NL-NML-97355/2021	EPI_ISL_3150979	2021-06-09	North America / Canada / Newfoundland and Labrador	Human		Cluster/Outbreak investigation	Male	8	Symptomatic		Original	Nasopharyngeal swab		AY.10	GK	G142D,P681R,R158del,F157del,T19R,A222V,D950N,E156G,T478K,D614G,L452R)	delta
hCoV-19/Reunion/PIMIT_14196/2021	EPI_ISL_3154282	2021-06-22	Africa / Reunion	Human			unknown	56	Asymptomatic		Original			AY.101	GK	P681R,R158del,F157del,T19R,D950N,E156G,T478K,V963A,D614G,L452R	delta
hCoV-19/Italy/APU-IZSPB-1867PT/2021	EPI_ISL_3098869	2021-07-20	Europe / Italy / Apulia / Bari / Bari	Human			Female	33	Asymptomatic		Original	Nasopharyngeal Swab		AY.122	GK	P681R,T19R,T478K,D614G,L452R	delta
hCoV-19/India/MH-NEERI-ONT-CIA5844/2021	EPI_ISL_3060909	2021-06-09	Asia / India / Maharasthra / Nagpur	Human			Female	42	Asymptomatic		Original	Nasopharyngeal and oropharyngeal swab		AY.122	GK	D950N,P681R,D614G	delta
hCoV-19/Canada/NL-NML-97347/2021	EPI_ISL_3150971	2021-06-07	North America / Canada / Newfoundland and Labrador	Human		Cluster/Outbreak investigation	Female	45	Symptomatic		Original	Nasopharyngeal swab		AY.10	GK	G142D,P681R,R158del,F157del,T19R,A222V,D950N,E156G,T478K,D614G,L452R)	delta
hCoV-19/Belgium/IPG-442/2021	EPI_ISL_3232514	2021-07-02	Europe / Belgium / Wallonie	Human	ZIP: 7904		Male	27	Symptomatic		Original	Nasopharyngeal swab	Surveillance	B.1.617.2	GK	P681R,R158del,F157del,T19R,D950N,E156G,T478K,D614G,L452R	delta
hCoV-19/Belgium/IPG-445/2021	EPI_ISL_3232517	2021-07-05	Europe / Belgium / Wallonie	Human	ZIP: 7760		Male	22	Symptomatic		Original	Nasopharyngeal swab	Surveillance	B.1.617.2	GK	P681R,R158del,F157del,T19R,D950N,E156G,T478K,D614G,L452R	delta
hCoV-19/Belgium/IPG-444/2021	EPI_ISL_3232516	2021-07-04	Europe / Belgium / Wallonie	Human	ZIP: 7730		Female	33	Symptomatic		Original	Nasopharyngeal swab	Surveillance	B.1.617.2	GK	P681R,R158del,F157del,T19R,D950N,E156G,T478K,D614G,L452R	delta
hCoV-19/Belgium/IPG-465/2021	EPI_ISL_3232535	2021-07-23	Europe / Belgium / Wallonie	Human	ZIP: 6044		Female	36	Symptomatic		Original	Nasopharyngeal swab	Surveillance	AY.125	GK	P681R,R158del,F157del,T19R,D950N,E156G,T478K,D614G,L452R)	delta
hCoV-19/Belgium/IPG-464/2021	EPI_ISL_3232534	2021-07-20	Europe / Belgium / Wallonie	Human	ZIP: 6200		Male	73	Symptomatic		Original	Nasopharyngeal swab	Surveillance	AY.66	GK	P681R,R158del,F157del,T19R,A222V,D950N,E156G,T478K,D614G,L452R)	delta
hCoV-19/Belgium/IPG-460/2021	EPI_ISL_3232530	2021-07-22	Europe / Belgium / Wallonie	Human	ZIP: 6040		Male	27	Symptomatic		Original	Nasopharyngeal swab	Surveillance	AY.43	GK	P681R,R158del,F157del,T19R,D950N,E156G,T478K,D614G,L452R	delta
hCoV-19/Belgium/IPG-450/2021	EPI_ISL_3232522	2021-07-09	Europe / Belgium / Wallonie	Human	ZIP: 7502		Male	21	Symptomatic		Original	Nasopharyngeal swab	Surveillance	B.1.617.2	GK	P681R,R158del,F157del,T19R,D950N,E156G,T478K,D614G,L452R	delta
hCoV-19/Belgium/IPG-449/2021	EPI_ISL_3232521	2021-07-09	Europe / Belgium / Wallonie	Human	ZIP: 7740		Male	21	Symptomatic		Original	Nasopharyngeal swab	Surveillance	B.1.617.2	GK	P681R,R158del,F157del,T19R,D950N,E156G,T478K,D614G,L452R	delta
hCoV-19/Belgium/IPG-452/2021	EPI_ISL_3232523	2021-07-23	Europe / Belgium / Wallonie	Human	ZIP: 5651		Female	24	Symptomatic		Original	Nasopharyngeal swab	Surveillance	AY.125	GK	P681R,R158del,F157del,T19R,D950N,E156G,T478K,D614G,L452R)	delta
hCoV-19/Belgium/IPG-456/2021	EPI_ISL_3232526	2021-07-20	Europe / Belgium / Wallonie	Human	ZIP: 6030		Male	39	Symptomatic		Original	Nasopharyngeal swab	Surveillance	AY.43	GK	P681R,R158del,F157del,T19R,D950N,E156G,T478K,T791I,D614G,L452R)	delta
hCoV-19/Belgium/IPG-455/2021	EPI_ISL_3232525	2021-07-22	Europe / Belgium / Wallonie	Human	ZIP: 6230		Female	11	Symptomatic		Original	Nasopharyngeal swab	Surveillance	AY.5.4	GK	P681R,R158del,F157del,T19R,D950N,E156G,T478K,D614G,L452R	delta
hCoV-19/Belgium/IPG-457/2021	EPI_ISL_3232527	2021-07-20	Europe / Belgium / Wallonie	Human	ZIP: 1370		Female	62	Symptomatic		Original	Nasopharyngeal swab	Surveillance	AY.66	GK	P681R,R158del,F157del,T19R,A222V,D950N,E156G,T478K,D614G,L452R)	delta
hCoV-19/Belgium/IPG-462/2021	EPI_ISL_3232532	2021-07-23	Europe / Belgium / Wallonie	Human	ZIP: 6140		Female	24	Symptomatic		Original	Nasopharyngeal swab	Surveillance	AY.125	GK	P681R,R158del,F157del,T19R,D950N,E156G,T478K,D614G,L452R)	delta
hCoV-19/Belgium/IPG-461/2021	EPI_ISL_3232531	2021-07-23	Europe / Belgium / Wallonie	Human	ZIP: 6040		Female	28	Symptomatic		Original	Nasopharyngeal swab	Surveillance	AY.91	GK	P681R,R158del,F157del,T19R,D950N,E156G,T478K,D614G,L452R)	delta
hCoV-19/Belgium/IPG-459/2021	EPI_ISL_3232529	2021-07-20	Europe / Belgium / Wallonie	Human	ZIP: 6020		Female	52	Symptomatic		Original	Nasopharyngeal swab	Surveillance	AY.43	GK	P681R,R158del,F157del,T19R,D950N,E156G,T478K,T791I,D614G,L452R	delta
hCoV-19/Belgium/IPG-443/2021	EPI_ISL_3232515	2021-07-02	Europe / Belgium / Wallonie	Human	ZIP: 7601		Male	20	Symptomatic		Original	Nasopharyngeal swab	Surveillance	B.1.617.2	GK	P681R,R158del,F157del,T19R,D950N,E156G,T478K,D614G,L452R	delta
hCoV-19/Belgium/IPG-463/2021	EPI_ISL_3232533	2021-07-20	Europe / Belgium / Wallonie	Human	ZIP: 6040		Female	16	Symptomatic		Original	Nasopharyngeal swab	Surveillance	AY.43	GK	P681R,R158del,F157del,T19R,D950N,E156G,T478K,D614G,L452R	delta
hCoV-19/Belgium/IPG-446/2021	EPI_ISL_3232518	2021-07-05	Europe / Belgium / Wallonie	Human	ZIP: 7618		Male	59	Symptomatic		Original	Nasopharyngeal swab	Surveillance	B.1.617.2	GK	P681R,R158del,F157del,T19R,D950N,E156G,T478K,D614G,L452R	delta
hCoV-19/Belgium/IPG-448/2021	EPI_ISL_3232520	2021-07-08	Europe / Belgium / Wallonie	Human	ZIP: 7502		Male	50	Symptomatic		Original	Nasopharyngeal swab	Surveillance	B.1.617.2	GK	P681R,R158del,F157del,T19R,D950N,E156G,T478K,D614G,L452R	delta
hCoV-19/Belgium/IPG-447/2021	EPI_ISL_3232519	2021-07-07	Europe / Belgium / Wallonie	Human	ZIP: 7910		Male	31	Symptomatic		Original	Nasopharyngeal swab	Surveillance	B.1.617.2	GK	P681R,R158del,F157del,T19R,D950N,E156G,T478K,D614G,L452R	delta
hCoV-19/Belgium/IPG-453/2021	EPI_ISL_3232524	2021-07-20	Europe / Belgium / Wallonie	Human	ZIP: 6043		Male	31	Symptomatic		Original	Nasopharyngeal swab	Surveillance	AY.98.1	GK	P251L,P681R,R158del,F157del,T19R,D950N,E156G,T478K,D614G,L452R	delta
hCoV-19/Mexico/SIN_CIAD-MZT_S7379/2021	EPI_ISL_3244602	2021-07-09	North America / Mexico / Sinaloa / Mazatlan	Human		Non-sentinel-surveillance (hospital)	Male	2	Asymptomatic and Ambulatory	Not vaccinated	Original	Oropharyngeal swab		AY.26	GK	N1074S,G142D,P681R,R158del,F157del,T19R,A222V,E156G,T478K,D614G,L452R)	delta
hCoV-19/Mexico/SIN_CIAD-MZT_HJ2410/2021	EPI_ISL_3244595	2021-07-09	North America / Mexico / Sinaloa / Mazatlan	Human		Non-sentinel-surveillance (hospital)	Female	23	Symptomatic and Ambulatory	Complete Sinovac	Original	Oropharyngeal swab		AY.26	GK	N1074S,G142D,P681R,R158del,F157del,T19R,A222V,E156G,T478K,D614G,C1253F,L452R)	delta
hCoV-19/Mexico/SIN_CIAD-MZT_ID2935/2021	EPI_ISL_3244601	2021-07-12	North America / Mexico / Sinaloa / Mazatlan	Human		Non-sentinel-surveillance (hospital)	Female	27	Symptomatic and Ambulatory	Not vaccinated	Original	Oropharyngeal swab		AY.26	GK	G142D,L5F,P681R,R158del,F157del,T19R,A222V,E156G,T478K,D614G,L452R	delta
hCoV-19/Mexico/SIN_CIAD-MZT_HJ2495/2021	EPI_ISL_3244599	2021-07-12	North America / Mexico / Sinaloa / Mazatlan	Human		Non-sentinel-surveillance (hospital)	Male	68	Asymptomatic and Ambulatory	Complete AstraZeneca	Original	Oropharyngeal swab		AY.26	GK	N1074S,P681R,R158del,F157del,T19R,A222V,E156G,T478K,D614G,L452R)	delta
hCoV-19/Mexico/SIN_CIAD-MZT_HJ2472/2021	EPI_ISL_3244597	2021-07-12	North America / Mexico / Sinaloa / Mazatlan	Human		Non-sentinel-surveillance (hospital)	Male	50	Symptomatic and Ambulatory	Complete CanSino	Original	Oropharyngeal swab		AY.26	GK	N1074S,G142D,P681R,R158del,F157del,T19R,A222V,E156G,T478K,D614G,L452R)	delta
hCoV-19/Maldives/MAV32203/2021	EPI_ISL_3275173	2021-05-03	Asia / Maldives / F.Feeali	Human			Female	35	Positive		Original	Nasopharyngeal swab		B.1.617.2	GK	G142D,P681R,T19R,D950N,T478K,D614G,L452R	delta
hCoV-19/Italy/FVG-UD-64029500/2021	EPI_ISL_3333623	2021-07-22	Europe / Italy / Friuli Venezia Giulia	Human			Male	19	Oligosymptomatic	No	Original	Oropharyngeal swab		AY.70	GK	G142D,R21T,P681R,R158del,F157del,T19R,A222V,D950N,E156G,T478K,D614G,L452R)	delta
hCoV-19/Belgium/IPG-468/2021	EPI_ISL_3355606	2021-07-30	Europe / Belgium / Wallonie	Human	Other: ZIP 7070	Surveillance	Male	41	Symptomatic		Original	Nasopharyngeal swab		AY.43	GK	N185S,P681R,D1259Y,R158del,F157del,T19R,D950N,E156G,T478K,D614G,L452R)	delta
hCoV-19/Belgium/IPG-477/2021	EPI_ISL_3355614	2021-07-27	Europe / Belgium / Wallonie	Human	Other: ZIP 6020	Surveillance	Male	52	Symptomatic		Original	Nasopharyngeal swab		AY.9.2	GK	P681R,R158del,D1146Y,F157del,T19R,A222V,D950N,E156G,T478K,D614G,L452R)	delta
hCoV-19/Belgium/IPG-474/2021	EPI_ISL_3355612	2021-07-29	Europe / Belgium / Wallonie	Human	Other: ZIP 6180	Surveillance	Female	84	Symptomatic		Original	Nasopharyngeal swab		AY.66	GK	P681R,R158del,F157del,T19R,A222V,D950N,E156G,T478K,D614G,L452R)	delta
hCoV-19/Belgium/IPG-482/2021	EPI_ISL_3355618	2021-07-19	Europe / Belgium / Wallonie	Human	Other: ZIP 7500	Surveillance	Female	29	Symptomatic		Original	Nasopharyngeal swab		AY.43	GK	P681R,R158del,F157del,T19R,D950N,E156G,T478K,D614G,L452R	delta
hCoV-19/Belgium/IPG-472/2021	EPI_ISL_3355610	2021-07-26	Europe / Belgium / Wallonie	Human	Other: ZIP 6210	Surveillance	Female	70	Symptomatic		Original	Nasopharyngeal swab		AY.43	GK	P681R,R158del,F157del,T19R,D950N,E156G,T478K,T791I,D614G,L452R	delta
hCoV-19/Belgium/IPG-489/2021	EPI_ISL_3355625	2021-07-14	Europe / Belgium / Wallonie	Human	Other: ZIP 7520	Surveillance	Female	26	Symptomatic		Original	Nasopharyngeal swab		AY.43	GK	P681R,T19R,D950N,T478K,D614G,L452R	delta
hCoV-19/Belgium/IPG-486/2021	EPI_ISL_3355622	2021-07-16	Europe / Belgium / Wallonie	Human	Other: ZIP 7538	Surveillance	Male	21	Symptomatic		Original	Nasopharyngeal swab		AY.43	GK	P681R,T19R,D950N,T478K,D614G,L452R	delta
hCoV-19/Belgium/IPG-485/2021	EPI_ISL_3355621	2021-07-16	Europe / Belgium / Wallonie	Human	Other: ZIP 7600	Surveillance	Female	30	Symptomatic		Original	Nasopharyngeal swab		AY.98.1	GK	P251L,P681R,R158del,F157del,T19R,D950N,E156G,T478K,D614G,L452R	delta
hCoV-19/Belgium/IPG-469/2021	EPI_ISL_3355607	2021-07-27	Europe / Belgium / Wallonie	Human	Other: ZIP 6183	Surveillance	Male	26	Symptomatic		Original	Nasopharyngeal swab		AY.9.2	GK	P681R,R158del,D1146Y,F157del,T19R,A222V,D950N,E156G,T478K,D614G,L452R)	delta
hCoV-19/Belgium/IPG-467/2021	EPI_ISL_3355605	2021-07-30	Europe / Belgium / Wallonie	Human	Other: ZIP 6032	Surveillance	Male	24	Symptomatic		Original	Nasopharyngeal swab		AY.9.2	GK	P681R,R158del,D1146Y,F157del,T19R,A222V,D950N,E156G,T478K,D614G,L452R)	delta
hCoV-19/Belgium/IPG-473/2021	EPI_ISL_3355611	2021-07-26	Europe / Belgium / Wallonie	Human	Other: ZIP 6230	Surveillance	Male	48	Symptomatic		Original	Nasopharyngeal swab		AY.70	GK	R21T,P681R,R158del,F157del,T19R,A222V,D950N,E156G,T478K,D614G,L452R)	delta
hCoV-19/Belgium/IPG-479/2021	EPI_ISL_3355616	2021-07-26	Europe / Belgium / Wallonie	Human	Other: ZIP 6010	Surveillance	Male	63	Symptomatic		Original	Nasopharyngeal swab		AY.122	GK	P681R,R158del,F157del,T19R,D950N,E156G,T478K,D614G,L452R)	delta
hCoV-19/Belgium/IPG-483/2021	EPI_ISL_3355619	2021-07-19	Europe / Belgium / Wallonie	Human	Other: ZIP 7500	Surveillance	Male	31	Symptomatic		Original	Nasopharyngeal swab		AY.43	GK	P681R,R158del,F157del,T19R,D950N,E156G,T478K,D614G,L452R	delta
hCoV-19/Belgium/IPG-488/2021	EPI_ISL_3355624	2021-07-14	Europe / Belgium / Wallonie	Human	Other: ZIP 7640	Surveillance	Female	37	Symptomatic		Original	Nasopharyngeal swab		AY.43	GK	P681R,R158del,F157del,T19R,D950N,E156G,T478K,D614G,L452R	delta
hCoV-19/Belgium/IPG-494/2021	EPI_ISL_3397892	2021-08-02	Europe / Belgium / Wallonie	Human	ZIP CODE: 6060		Male	69	Symptomatic		Original	Nasopharyngeal swab	surveillance	AY.75	GK	P681R,R158del,F157del,T19R,A222V,D950N,E156G,T478K,D614G,L452R)	delta
hCoV-19/Belgium/IPG-498/2021	EPI_ISL_3397899	2021-08-03	Europe / Belgium / Wallonie	Human	ZIP CODE: 6250		Male	48	Symptomatic		Original	Nasopharyngeal swab	surveillance	AY.126	GK	I850L,P681R,R158del,F157del,T19R,D950N,E156G,T478K,D614G,L452R	delta
hCoV-19/Belgium/IPG-496/2021	EPI_ISL_3397895	2021-08-02	Europe / Belgium / Wallonie	Human	ZIP CODE: 6200		Female	34	Symptomatic		Original	Nasopharyngeal swab	surveillance	AY.131	GK	P681R,R158del,F157del,T19R,D950N,G446V,E156G,T478K,D614G,L452R)	delta
hCoV-19/Belgium/IPG-497/2021	EPI_ISL_3397897	2021-08-02	Europe / Belgium / Wallonie	Human	ZIP CODE: 6032		Male	44	Symptomatic		Original	Nasopharyngeal swab	surveillance	AY.71	GK	P681R,R158del,F157del,S1252F,T19R,A222V,D950N,E156G,T478K,D614G,L452R)	delta
hCoV-19/Belgium/IPG-507/2021	EPI_ISL_3397914	2021-08-02	Europe / Belgium / Wallonie	Human	ZIP CODE: 7911		Male	46	Symptomatic		Original	Nasopharyngeal swab	surveillance	AY.43	GK	P681R,R158del,F157del,T19R,D950N,E156G,T478K,T791I,D614G,L452R	delta
hCoV-19/Belgium/IPG-508/2021	EPI_ISL_3397916	2021-07-31	Europe / Belgium / Wallonie	Human	ZIP CODE: 7503		Male	27	Symptomatic		Original	Nasopharyngeal swab	surveillance	AY.5.4	GK	P681R,R158del,F157del,T19R,D950N,G1219V,E156G,T478K,D614G,L452R	delta
hCoV-19/Belgium/IPG-499/2021	EPI_ISL_3397900	2021-08-07	Europe / Belgium / Wallonie	Human	ZIP CODE: 6020		Male	30	Symptomatic		Original	Nasopharyngeal swab	surveillance	AY.125	GK	P681R,R158del,F157del,T19R,D950N,E156G,T478K,D614G,L452R)	delta
hCoV-19/Belgium/IPG-503/2021	EPI_ISL_3397907	2021-08-03	Europe / Belgium / Wallonie	Human	ZIP CODE: 5032		Female	60	Symptomatic		Original	Nasopharyngeal swab	surveillance	AY.43	GK	P681R,R158del,F157del,T19R,D950N,Q173H,E156G,T478K,D614G,L452R	delta
hCoV-19/Belgium/IPG-504/2021	EPI_ISL_3397909	2021-08-02	Europe / Belgium / Wallonie	Human	ZIP CODE: 6120		Female	15	Symptomatic		Original	Nasopharyngeal swab	surveillance	AY.125	GK	P681R,R158del,F157del,T19R,D950N,E156G,T478K,D614G,L452R)	delta
hCoV-19/Belgium/IPG-501/2021	EPI_ISL_3397904	2021-08-04	Europe / Belgium / Wallonie	Human	ZIP CODE: 6001		Female	23	Symptomatic		Original	Nasopharyngeal swab	surveillance	AY.131	GK	P681R,R158del,F157del,T19R,D950N,G446V,E156G,T478K,D614G,L452R)	delta
hCoV-19/Belgium/IPG-502/2021	EPI_ISL_3397905	2021-08-03	Europe / Belgium / Wallonie	Human	ZIP CODE: 6000		Female	17	Symptomatic		Original	Nasopharyngeal swab	surveillance	AY.75	GK	P681R,R158del,F157del,T19R,A222V,D950N,E156G,T478K,D614G,L452R)	delta
hCoV-19/Belgium/IPG-506/2021	EPI_ISL_3397912	2021-08-02	Europe / Belgium / Wallonie	Human	ZIP CODE: 7700		Male	38	Symptomatic		Original	Nasopharyngeal swab	surveillance	AY.43	GK	P681R,R158del,F157del,T19R,D950N,E156G,T478K,T791I,D614G,L452R	delta
hCoV-19/French Guiana/IPG2021866/2021	EPI_ISL_3398097	2021-08-06	South America / French Guiana / Cayenne	Human			Female	36	Symptomatic		Original	Nasopharyngeal swab		AY.43	GK	P681R,R158del,F157del,T19R,D950N,E156G,T478K,D614G,L452R	delta
hCoV-19/French Guiana/IPG2021889/2021	EPI_ISL_3398114	2021-08-08	South America / French Guiana / Cayenne	Human			Male	11	Symptomatic		Original	Nasopharyngeal swab		AY.43	GK	P681R,R158del,F157del,T19R,D950N,E156G,T478K,D614G,L452R	delta
hCoV-19/French Guiana/IPG2021880/2021	EPI_ISL_3398105	2021-08-09	South America / French Guiana / Montsinery	Human			Female	38	Symptomatic		Original	Nasopharyngeal swab		AY.43	GK	G142D,P681R,R158del,F157del,T19R,D950N,E156G,T478K,D614G,L452R	delta
hCoV-19/Belgium/IPG-484/2021	EPI_ISL_3355620	2021-07-16	Europe / Belgium / Wallonie	Human	Other: ZIP 7620	Surveillance	Male	26	Symptomatic		Original	Nasopharyngeal swab		AY.43	GK	P681R,R158del,F157del,T19R,D950N,E156G,T478K,T791I,D614G,L452R	delta
hCoV-19/Maldives/MAV31878/2021	EPI_ISL_3275167	2021-05-03	Asia / Maldives / K. Himmafushi Sample	Human			Male	21	Positive		Original	Nasopharyngeal swab		AY.122	GK	G142D,P681R,T19R,D950N,E156G,T478K,D614G,L452R)	delta
hCoV-19/Mexico/SIN_CIAD-MZT_HJ2446/2021	EPI_ISL_3244596	2021-07-12	North America / Mexico / Sinaloa / Mazatlan	Human		Non-sentinel-surveillance (hospital)	Female	63	Symptomatic and Ambulatory	Complete AstraZeneca	Original	Oropharyngeal swab		AY.26	GK	N1074S,G142D,P681R,R158del,F157del,T19R,A222V,E156G,T478K,D614G,L452R)	delta
hCoV-19/Mexico/SIN_CIAD-MZT_HJ2489/2021	EPI_ISL_3244598	2021-07-12	North America / Mexico / Sinaloa / Mazatlan	Human		Non-sentinel-surveillance (hospital)	Female	61	Symptomatic and Ambulatory	Complete AstraZeneca	Original	Oropharyngeal swab		AY.26	GK	N1074S,G142D,P681R,R158del,F157del,T19R,A222V,E156G,T478K,D614G,L452R)	delta
hCoV-19/Belgium/IPG-505/2021	EPI_ISL_3397910	2021-08-02	Europe / Belgium / Wallonie	Human	ZIP CODE: 6032		Male	20	Symptomatic		Original	Nasopharyngeal swab	surveillance	AY.43	GK	P681R,R158del,F157del,T19R,D950N,E156G,T478K,D614G,L452R	delta
hCoV-19/Belgium/IPG-500/2021	EPI_ISL_3397902	2021-08-03	Europe / Belgium / Wallonie	Human	ZIP CODE: 6110		Female	44	Symptomatic		Original	Nasopharyngeal swab	surveillance	AY.43	GK	P681R,R158del,F157del,T19R,D950N,E156G,T478K,D614G,L452R	delta
hCoV-19/French Guiana/IPG2021884/2021	EPI_ISL_3398109	2021-08-09	South America / French Guiana / Matoury	Human			Female	68	Symptomatic		Original	Nasopharyngeal swab		AY.98.1	GK	S494P,P251L,P681R,R158del,F157del,T19R,D950N,E156G,T478K,D614G,L452R	delta
hCoV-19/Belgium/IPG-481/2021	EPI_ISL_3355617	2021-07-27	Europe / Belgium / Wallonie	Human	Other: ZIP 6044	Surveillance	Female	25	Symptomatic		Original	Nasopharyngeal swab		AY.70	GK	R21T,P681R,T19R,D950N,T478K,D614G,L452R)	delta
hCoV-19/Belgium/IPG-512/2021	EPI_ISL_3397922	2021-07-22	Europe / Belgium / Wallonie	Human	ZIP CODE: 7500		Male	23	Symptomatic		Original	Nasopharyngeal swab	surveillance	AY.43	GK	P681R,R158del,F157del,T19R,D950N,E156G,T478K,D614G,L452R	delta
hCoV-19/Belgium/IPG-511/2021	EPI_ISL_3397921	2021-07-27	Europe / Belgium / Wallonie	Human	ZIP CODE: 7536		Female	20	Symptomatic		Original	Nasopharyngeal swab	surveillance	AY.125	GK	P681R,R158del,F157del,T19R,D950N,E156G,T478K,D614G,L452R)	delta
hCoV-19/Belgium/IPG-509/2021	EPI_ISL_3397917	2021-07-29	Europe / Belgium / Wallonie	Human	ZIP CODE: 7500		Female	32	Symptomatic		Original	Nasopharyngeal swab	surveillance	AY.125	GK	P681R,R158del,F157del,T19R,D950N,E156G,T478K,D614G,L452R)	delta
hCoV-19/Belgium/IPG-491/2021	EPI_ISL_3397887	2021-08-04	Europe / Belgium / Wallonie	Human	ZIP CODE: 6210		Female	20	Symptomatic		Original	Nasopharyngeal swab	surveillance	AY.92	GK	P681R,P1162S,R158del,D178N,F157del,T19R,D950N,E156G,T478K,D614G,L452R	delta
hCoV-19/Belgium/IPG-490/2021	EPI_ISL_3397885	2021-08-05	Europe / Belgium / Wallonie	Human	ZIP CODE: 6230		Male	34	Symptomatic		Original	Nasopharyngeal swab	surveillance	AY.66	GK	P681R,R158del,F157del,T19R,A222V,D950N,E156G,T478K,D614G,L452R)	delta
hCoV-19/USA/LA-EVTL3850/2021	EPI_ISL_3398135	2021-07-30	North America / USA / Louisiana / Lincoln Parish	Human		Baseline surveillance	Male	35	Asymptomatic	Not vaccinated	Original	Midturbinate swab		AY.44	GK	P681R,T19R,D950N,T478K,D614G,L452R	delta
hCoV-19/Italy/FVG-PN-64029381/2021	EPI_ISL_3333598	2021-07-20	Europe / Italy / Friuli Venezia Giulia	Human			Male	33	Asymptomatic	No	Original	Oropharyngeal swab		AY.6	GK	G142D,P681R,R158del,F157del,T19R,D950N,E156G,T478K,D614G,L452R	delta
hCoV-19/Italy/FVG-TS-37055090/2021	EPI_ISL_3333614	2021-07-22	Europe / Italy / Friuli Venezia Giulia	Human	Other: Patient infected while traveling in Greece		Female	38	Oligosymptomatic	Pfizer 2nd (2021/03/05)	Original	Oropharyngeal swab		AY.7.2	GK	G142D,P681R,R158del,F157del,T19R,D950N,E156G,T478K,D614G,L452R)	delta
hCoV-19/Italy/FVG-TS-64029583/2021	EPI_ISL_3333615	2021-07-23	Europe / Italy / Friuli Venezia Giulia	Human			Female	18	Oligosymptomatic	No	Original	Oropharyngeal swab		AY.43	GK	G142D,P681R,R158del,F157del,T19R,D950N,E156G,T478K,D614G,L452R)	delta
hCoV-19/Italy/FVG-TS-37038123/2021	EPI_ISL_3333608	2021-07-19	Europe / Italy / Friuli Venezia Giulia	Human			Male	52	Asymptomatic	No	Original	Oropharyngeal swab		AY.43	GK	G142D,P681R,R158del,F157del,T19R,D950N,E156G,T478K,D614G,L452R)	delta
hCoV-19/Italy/FVG-TS-37058765/2021	EPI_ISL_3333617	2021-07-23	Europe / Italy / Friuli Venezia Giulia	Human	Other: Patient infected while traveling in Spain		Male	15	Oligosymptomatic	No	Original	Oropharyngeal swab		AY.42	GK	Y145S,S161del,E156del,H146S,S155del,T19R,S151del,A163del,D950N,T478K,Y160del,N165del,P681R,R158del,E154del,ins80XXXXXXXXXXXXXX,W152del,F157del,K147A,K150del,T719I,N164del,V159del,S162del,M153del,D614G,L452R)	delta
hCoV-19/Italy/FVG-TS-37057037/2021	EPI_ISL_3333616	2021-07-23	Europe / Italy / Friuli Venezia Giulia	Human			Female	69	Oligosymptomatic	AstraZeneca 1st (2021/05/14)	Original	Oropharyngeal swab		AY.43	GK	G142D,P681R,R158del,F157del,T19R,D950N,E156G,T478K,D614G,L452R	delta
hCoV-19/Italy/FVG-UD-64029462/2021	EPI_ISL_3333622	2021-07-21	Europe / Italy / Friuli Venezia Giulia	Human			Male	18	Oligosymptomatic	Pfizer 1st (2021/06/27)	Original	Oropharyngeal swab		AY.70	GK	G142D,R21T,P681R,R158del,F157del,T19R,A222V,D950N,E156G,T478K,D614G,L452R)	delta
hCoV-19/Italy/FVG-UD-64029388/2021	EPI_ISL_3333618	2021-07-19	Europe / Italy / Friuli Venezia Giulia	Human	Other: Patient infected while traveling in France		Female	19	Oligosymptomatic	No	Original	Oropharyngeal swab		AY.43	GK	G142D,P681R,R158del,F157del,T19R,D950N,C1250F,E156G,T478K,D614G,L452R)	delta
hCoV-19/Belgium/IPG-470/2021	EPI_ISL_3355608	2021-07-30	Europe / Belgium / Wallonie	Human	Other: ZIP 6032	Surveillance	Female	10	Symptomatic		Original	Nasopharyngeal swab		AY.34.1	GK	L277I,P681R,Q677H,T19R,D950N,T478K,L1265F,D614G,L452R	delta
hCoV-19/Belgium/IPG-471/2021	EPI_ISL_3355609	2021-07-30	Europe / Belgium / Wallonie	Human	Other: ZIP 6044	Surveillance	Male	32	Symptomatic		Original	Nasopharyngeal swab		AY.125	GK	L5F,P681R,R158del,F157del,T19R,D950N,E156G,T478K,D614G,L452R)	delta
hCoV-19/Belgium/IPG-476/2021	EPI_ISL_3355613	2021-07-29	Europe / Belgium / Wallonie	Human	Other: ZIP 6280	Surveillance	Male	29	Symptomatic		Original	Nasopharyngeal swab		AY.125	GK	P681R,R158del,F157del,T19R,D950N,E156G,T478K,D614G,L452R)	delta
hCoV-19/Belgium/IPG-478/2021	EPI_ISL_3355615	2021-07-30	Europe / Belgium / Wallonie	Human	Other: ZIP 6030	Surveillance	Male	36	Symptomatic		Original	Nasopharyngeal swab		AY.125	GK	P681R,R158del,F157del,T19R,D950N,E156G,T547I,D614G	delta
hCoV-19/Belgium/IPG-487/2021	EPI_ISL_3355623	2021-07-15	Europe / Belgium / Wallonie	Human	Other: ZIP 7500	Surveillance	Male	29	Symptomatic		Original	Nasopharyngeal swab		AY.43	GK	P681R,R158del,F157del,T19R,D950N,E156G,T478K,D614G,L452R	delta
hCoV-19/Belgium/IPG-492/2021	EPI_ISL_3397888	2021-08-04	Europe / Belgium / Wallonie	Human	ZIP CODE: 6000		Female	35	Symptomatic		Original	Nasopharyngeal swab	surveillance	AY.43	GK	P681R,R158del,F157del,T19R,D950N,E156G,T478K,D614G,L452R	delta
hCoV-19/Belgium/IPG-495/2021	EPI_ISL_3397893	2021-08-02	Europe / Belgium / Wallonie	Human	ZIP CODE: 6110		Male	46	Symptomatic		Original	Nasopharyngeal swab	surveillance	AY.43	GK	P681R,R158del,F157del,T19R,D950N,E156G,T478K,D614G,L452R	delta
hCoV-19/Belgium/IPG-510/2021	EPI_ISL_3397919	2021-07-28	Europe / Belgium / Wallonie	Human	ZIP CODE: 7900		Male	30	Symptomatic		Original	Nasopharyngeal swab	surveillance	AY.43	GK	P681R,R158del,F157del,T19R,D950N,E156G,T478K,T791I,D614G,L452R	delta
hCoV-19/Belgium/IPG-493/2021	EPI_ISL_3397890	2021-08-05	Europe / Belgium / Wallonie	Human	ZIP CODE: 6180		Female	83	Symptomatic		Original	Nasopharyngeal swab	surveillance	AY.5.4	GK	P681R,R158del,F157del,T19R,D950N,E156G,T478K,D614G,L452R	delta
hCoV-19/French Guiana/IPG2021886/2021	EPI_ISL_3398111	2021-08-07	South America / French Guiana / Cayenne	Human			Male	0	Symptomatic		Original	Nasopharyngeal swab		AY.122	GK	P681R,R158del,F157del,T19R,D950N,E156G,T478K,D614G,L452R)	delta
hCoV-19/French Guiana/IPG2021871/2021	EPI_ISL_3398099	2021-08-03	South America / French Guiana / Cs Apatou	Human			Male	28	Symptomatic		Original	Nasopharyngeal swab		AY.43	GK	P681R,R158del,F157del,T19R,D950N,E156G,T478K,D614G,L452R	delta
hCoV-19/French Guiana/IPG2021875/2021	EPI_ISL_3398101	2021-08-03	South America / French Guiana / Cayenne	Human			Male	60	Symptomatic		Original	Nasopharyngeal swab		AY.43	GK	G142D,P681R,R158del,F157del,T19R,D950N,E156G,T478K,D614G,L452R	delta
hCoV-19/French Guiana/IPG2021876/2021	EPI_ISL_3398102	2021-08-05	South America / French Guiana / Cayenne	Human			Female	90	Symptomatic		Original	Nasopharyngeal swab		AY.43	GK	P681R,R158del,F157del,T19R,D950N,E156G,T478K,D614G,L452R	delta
hCoV-19/French Guiana/IPG2021881/2021	EPI_ISL_3398106	2021-08-09	South America / French Guiana / Cayenne	Human			Male	22	Asymptomatic		Original	Nasopharyngeal swab		AY.34	GK	T95I,G142D,P681R,R158del,F157del,Q677H,T19R,D950N,E156G,T478K,D614G,L452R)	delta
hCoV-19/French Guiana/IPG2021885/2021	EPI_ISL_3398110	2021-08-09	South America / French Guiana / Macouria	Human			Female	30	Symptomatic		Original	Nasopharyngeal swab		AY.43	GK	G142D,P681R,R158del,F157del,T19R,D950N,E156G,T478K,D614G,L452R	delta
hCoV-19/French Guiana/IPG2021865/2021	EPI_ISL_3398096	2021-08-06	South America / French Guiana / Cayenne	Human			Male	47	Symptomatic	2021-06-06	Original	Nasopharyngeal swab		AY.43	GK	P681R,R158del,F157del,T19R,D950N,E156G,T478K,D614G,L452R	delta
hCoV-19/French Guiana/IPG2021892/2021	EPI_ISL_3398117	2021-08-09	South America / French Guiana / Maripasoula	Human			Female	31	Symptomatic		Original	Nasopharyngeal swab		AY.43	GK	P681R,R158del,F157del,T19R,D950N,E156G,T478K,D614G,L452R	delta
hCoV-19/French Guiana/IPG2021870/2021	EPI_ISL_3398098	2021-08-04	South America / French Guiana / St Laurent Du Maroni	Human			Male	41	Symptomatic		Original	Nasopharyngeal swab		AY.34	GK	A1174V,P681R,R158del,F157del,Q677H,T19R,D950N,E156G,T478K,D614G,L452R)	delta
hCoV-19/French Guiana/IPG2021877/2021	EPI_ISL_3398103	2021-08-06	South America / French Guiana / Cayenne	Human			Female	68	Symptomatic		Original	Nasopharyngeal swab		AY.43	GK	P681R,R158del,F157del,T19R,D950N,E156G,T478K,D614G,L452R	delta
hCoV-19/Italy/APU-IZSPB-2127PT/2021	EPI_ISL_3485899	2021-07-27	Europe / Italy / Apulia / Lecce / Lecce	Human			Female	70	Asymptomatic		Original	Nasopharyngeal Swab		AY.43	GK	P681R,T19R,T478K,D614G,L452R	delta
hCoV-19/Italy/APU-IZSPB-1921PT/2021	EPI_ISL_3485877	2021-07-21	Europe / Italy / Apulia / Lecce / Lecce	Human			Male	52	Asymptomatic		Original	Nasopharyngeal Swab		AY.122	GK	S680P,P681R,T19R,T478K,D614G,L452R,A522V)	delta
hCoV-19/Italy/APU-IZSPB-2077PT/2021	EPI_ISL_3485860	2021-07-23	Europe / Italy / Apulia / Foggia / Foggia	Human			Female	22	Paucisymptomatic		Original	Nasopharyngeal Swab		AY.46.6	GK	P681R,T19R,T478K,D614G,L452R	delta
hCoV-19/Italy/APU-IZSPB-2080PT/2021	EPI_ISL_3485864	2021-07-23	Europe / Italy / Apulia / Foggia / Foggia	Human			Male	33	Paucisymptomatic		Original	Nasopharyngeal Swab		AY.58	GK	T478K,P681R,D614G,L452R,T19R,A222V)	delta
hCoV-19/Italy/APU-IZSPB-1907PT/2021	EPI_ISL_3485857	2021-07-21	Europe / Italy / Apulia / Foggia / Foggia	Human			Male	34	Paucisymptomatic		Original	Nasopharyngeal Swab		AY.58	GK	T478K,P681R,D614G,L452R,T19R,A222V)	delta
hCoV-19/Italy/APU-IZSPB-2237PT/2021	EPI_ISL_3485837	2021-07-30	Europe / Italy / Apulia / Brindisi / Brindisi	Human			Male	56	Paucisymptomatic		Original	Nasopharyngeal Swab		AY.42	GK	P681R,T19R,T478K,D614G,L452R	delta
hCoV-19/Italy/APU-IZSPB-2220PT/2021	EPI_ISL_3485831	2021-07-29	Europe / Italy / Apulia / Brindisi / Brindisi	Human			Female	30	Asymptomatic		Original	Nasopharyngeal Swab		AY.5	GK	P681R,T19R,T478K,D614G,L452R	delta
hCoV-19/Italy/APU-IZSPB-2125PT/2021	EPI_ISL_3485897	2021-07-27	Europe / Italy / Apulia / Lecce / Lecce	Human			Female	87	Paucisymptomatic		Original	Nasopharyngeal Swab		AY.43	GK	P681R,T19R,T478K,D614G,L452R	delta
hCoV-19/Italy/APU-IZSPB-2102PT/2021	EPI_ISL_3485887	2021-07-30	Europe / Italy / Apulia / Lecce / Lecce	Human			Male	6	Paucisymptomatic		Original	Nasopharyngeal Swab		AY.112	GK	P681R,T19R,T478K,D614G,L452R	delta
hCoV-19/Italy/APU-IZSPB-2109PT/2021	EPI_ISL_3485889	2021-07-20	Europe / Italy / Apulia / Lecce / Lecce	Human			Male	18	Asymptomatic		Original	Nasopharyngeal Swab		AY.120	GK	P681R,T19R,T478K,D614G,V6F,L452R	delta
hCoV-19/Italy/APU-IZSPB-1970PT/2021	EPI_ISL_3485881	2021-07-21	Europe / Italy / Apulia / Lecce / Lecce	Human			Male	49	Asymptomatic		Original	Nasopharyngeal Swab		AY.43	GK	P681R,T19R,T478K,D614G,L452R	delta
hCoV-19/Italy/APU-IZSPB-1920PT/2021	EPI_ISL_3485875	2021-07-21	Europe / Italy / Apulia / Lecce / Lecce	Human			Female	46	Paucisymptomatic		Original	Nasopharyngeal Swab		AY.42	GK	P681R,T19R,D950N,T478K,D614G,L452R,S813I)	delta
hCoV-19/Italy/APU-IZSPB-1919PT/2021	EPI_ISL_3485874	2021-07-21	Europe / Italy / Apulia / Lecce / Lecce	Human			Female	37	Paucisymptomatic		Original	Nasopharyngeal Swab		AY.34	GK	P681R,Q677H,T19R,T478K,D614G,L452R	delta
hCoV-19/Italy/APU-IZSPB-1965PT/2021	EPI_ISL_3485879	2021-07-23	Europe / Italy / Apulia / Lecce / Lecce	Human			Female	26	Paucisymptomatic		Original	Nasopharyngeal Swab		AY.112	GK	T95I,P681R,Q677H,T19R,T478K,D614G,L452R	delta
hCoV-19/Italy/APU-IZSPB-1917PT/2021	EPI_ISL_3485872	2021-07-21	Europe / Italy / Apulia / Lecce / Lecce	Human			Male	40	Paucisymptomatic		Original	Nasopharyngeal Swab		AY.43	GK	P681R,D1259Y,T19R,T478K,G181V,M153I,D614G,L452R	delta
hCoV-19/Italy/APU-IZSPB-1915PT/2021	EPI_ISL_3485870	2021-07-17	Europe / Italy / Apulia / Lecce / Lecce	Human			Female	17	Paucisymptomatic		Original	Nasopharyngeal Swab		AY.122	GK	P681R,T19R,T478K,D614G,L452R	delta
hCoV-19/Italy/APU-IZSPB-2195PT/2021	EPI_ISL_3485815	2021-07-27	Europe / Italy / Apulia / Brindisi / Brindisi	Human			Male	66	Asymptomatic		Original	Nasopharyngeal Swab		AY.43	GK	P681R,T19R,T478K,D614G,L452R	delta
hCoV-19/Italy/APU-IZSPB-2200PT/2021	EPI_ISL_3485820	2021-07-27	Europe / Italy / Apulia / Brindisi / Brindisi	Human			Male	86	Paucisymptomatic		Original	Nasopharyngeal Swab		AY.125	GK	P681R,T19R,T478K,D614G,L452R	delta
hCoV-19/Italy/APU-IZSPB-2201PT/2021	EPI_ISL_3485823	2021-07-27	Europe / Italy / Apulia / Brindisi / Brindisi	Human			Female	44	Paucisymptomatic		Original	Nasopharyngeal Swab		AY.125	GK	P681R,T19R,T478K,D614G,L452R	delta
hCoV-19/Italy/APU-IZSPB-2188PT/2021	EPI_ISL_3485806	2021-07-27	Europe / Italy / Apulia / Brindisi / Brindisi	Human			Female	59	Paucisymptomatic		Original	Nasopharyngeal Swab		AY.42	GK	P681R,T19R,T478K,D614G,L452R	delta
hCoV-19/Italy/APU-IZSPB-2193PT/2021	EPI_ISL_3485814	2021-07-27	Europe / Italy / Apulia / Brindisi / Brindisi	Human			Female	21	Paucisymptomatic		Original	Nasopharyngeal Swab		AY.5	GK	P681R,T19R,T478K,D614G,L452R	delta
hCoV-19/Italy/APU-IZSPB-2191PT/2021	EPI_ISL_3485811	2021-07-27	Europe / Italy / Apulia / Brindisi / Brindisi	Human			Male	55	Paucisymptomatic		Original	Nasopharyngeal Swab		AY.43	GK	P681R,T19R,T478K,D614G,L452R	delta
hCoV-19/Italy/APU-IZSPB-2187PT/2021	EPI_ISL_3485803	2021-07-28	Europe / Italy / Apulia / Brindisi / Brindisi	Human			Male	71	Paucisymptomatic		Original	Nasopharyngeal Swab		AY.34	GK	P681R,Q677H,T19R,T478K,D614G,L452R	delta
hCoV-19/Italy/APU-IZSPB-2131PT/2021	EPI_ISL_3485902	2021-07-29	Europe / Italy / Apulia / Lecce / Lecce	Human			Female	29	Paucisymptomatic		Original	Nasopharyngeal Swab		AY.4	GK	P681R,T19R,T478K,D614G,L452R,R273S)	delta
hCoV-19/Italy/APU-IZSPB-2130PT/2021	EPI_ISL_3485900	2021-07-29	Europe / Italy / Apulia / Lecce / Lecce	Human			Male	78	Asymptomatic		Original	Nasopharyngeal Swab		AY.43	GK	P681R,T19R,T478K,D614G,L452R	delta
hCoV-19/Italy/APU-IZSPB-2250PT/2021	EPI_ISL_3485929	2021-07-26	Europe / Italy / Apulia / Taranto / Taranto	Human			Male	62	Asymptomatic		Original	Nasopharyngeal Swab		AY.42	GK	P681R,T19R,T478K,D614G,L452R	delta
hCoV-19/Italy/APU-IZSPB-2253PT/2021	EPI_ISL_3485933	2021-07-29	Europe / Italy / Apulia / Taranto / Taranto	Human			Male	22	Asymptomatic		Original	Nasopharyngeal Swab		AY.42	GK	P681R,T19R,T478K,D614G,L452R	delta
hCoV-19/Italy/APU-IZSPB-2069PT/2021	EPI_ISL_3485924	2021-07-23	Europe / Italy / Apulia / Taranto / Taranto	Human			Female	49	Asymptomatic		Original	Nasopharyngeal Swab		AY.42	GK	P681R,T19R,T478K,D614G,L452R	delta
hCoV-19/Italy/APU-IZSPB-2060PT/2021	EPI_ISL_3485922	2021-07-19	Europe / Italy / Apulia / Taranto / Taranto	Human			Female	15	Asymptomatic		Original	Nasopharyngeal Swab		AY.42	GK	P681R,T19R,D950N,T478K,D614G,L452R	delta
hCoV-19/Italy/APU-IZSPB-2059PT/2021	EPI_ISL_3485921	2021-07-19	Europe / Italy / Apulia / Taranto / Taranto	Human			Male	14	Paucisymptomatic		Original	Nasopharyngeal Swab		AY.42	GK	P681R,T19R,T478K,D614G,L452R	delta
hCoV-19/Italy/APU-IZSPB-2140PT/2021	EPI_ISL_3485905	2021-07-31	Europe / Italy / Apulia / Lecce / Lecce	Human			Male	56	Paucisymptomatic		Original	Nasopharyngeal Swab		AY.4	GK	P681R,T19R,T478K,D614G,L452R	delta
hCoV-19/Italy/APU-IZSPB-2138PT/2021	EPI_ISL_3485904	2021-07-31	Europe / Italy / Apulia / Lecce / Lecce	Human			Female	92	Asymptomatic		Original	Nasopharyngeal Swab		AY.43	GK	P681R,P479S,T19R,T478K,D614G,L452R	delta
hCoV-19/Italy/APU-IZSPB-2145PT/2021	EPI_ISL_3485908	2021-07-31	Europe / Italy / Apulia / Lecce / Lecce	Human			Female	15	Paucisymptomatic		Original	Nasopharyngeal Swab		AY.43	GK	V213L,P681R,T19R,T478K,D614G,L452R	delta
hCoV-19/Italy/APU-IZSPB-2141PT/2021	EPI_ISL_3485907	2021-07-31	Europe / Italy / Apulia / Lecce / Lecce	Human			Female	45	Paucisymptomatic		Original	Nasopharyngeal Swab		AY.116	GK	P681R,T19R,T478K,D614G,L452R	delta
hCoV-19/Italy/APU-IZSPB-2062PT/2021	EPI_ISL_3485913	2021-07-21	Europe / Italy / Apulia / Matera / Matera	Human			Male	11	Paucisymptomatic		Original	Nasopharyngeal Swab		AY.98.1	GK	P251L,P681R,T19R,T478K,D614G,L452R	delta
hCoV-19/Italy/APU-IZSPB-2178PT/2021	EPI_ISL_3485798	2021-07-31	Europe / Italy / Apulia / Brindisi / Brindisi	Human			Female	52	Paucisymptomatic		Original	Nasopharyngeal Swab		AY.34	GK	P681R,Q677H,T19R,T478K,D614G,L452R	delta
hCoV-19/Italy/APU-IZSPB-2173PT/2021	EPI_ISL_3485795	2021-08-01	Europe / Italy / Apulia / Brindisi / Brindisi	Human			Male	37	Asymptomatic		Original	Nasopharyngeal Swab		AY.122	GK	P681R,T19R,T478K,A879S,D614G,L452R	delta
hCoV-19/Italy/APU-IZSPB-2006PT/2021	EPI_ISL_3485789	2021-07-22	Europe / Italy / Apulia / Brindisi / Brindisi	Human			Female	23	Paucisymptomatic		Original	Nasopharyngeal Swab		AY.112	GK	P681R,T19R,T478K,D614G,L452R	delta
hCoV-19/Italy/APU-IZSPB-1996PT/2021	EPI_ISL_3485784	2021-07-22	Europe / Italy / Apulia / Brindisi / Brindisi	Human			Female	27	Paucisymptomatic		Original	Nasopharyngeal Swab		AY.122	GK	P681R,T19R,D950N,T478K,D614G,L452R	delta
hCoV-19/Italy/APU-IZSPB-1979PT/2021	EPI_ISL_3485776	2021-07-21	Europe / Italy / Apulia / Brindisi / Brindisi	Human			Male	1	Paucisymptomatic		Original	Nasopharyngeal Swab		AY.34	GK	P681R,Q677H,T19R,T478K,D614G,L452R	delta
hCoV-19/Italy/APU-IZSPB-2208PT/2021	EPI_ISL_3485773	2021-07-28	Europe / Italy / Apulia / Bari / Bari	Human			Female	18	Paucisymptomatic		Original	Nasopharyngeal Swab		AY.5	GK	P681R,T19R,T478K,D614G,L452R	delta
hCoV-19/Italy/APU-IZSPB-1982PT/2021	EPI_ISL_3485770	2021-07-21	Europe / Italy / Apulia / Bari / Bari	Human			Male	15	Paucisymptomatic		Original	Nasopharyngeal Swab		AY.53	GK	A27S,P681R,T19R,V610I,T478K,D614G,L452R)	delta
hCoV-19/Estonia/17311392/2021	EPI_ISL_3506126	2021-07-03	Europe / Estonia / Northern Estonia	Human			Female	51	Symptomatic		Original	Nasopharengeal swab		AY.122	GK	G142D,P681R,R158del,F157del,T19R,D950N,E156G,T478K,D614G,L452R)	delta
hCoV-19/Estonia/RC0025229/2021	EPI_ISL_3506122	2021-07-05	Europe / Estonia / Northern Estonia	Human			Male	42	Symptomatic		Original	Nasopharengeal swab		AY.122	GK	G142D,P681R,R158del,F157del,T19R,D950N,E156G,T478K,D614G,L452R)	delta
hCoV-19/Estonia/RC0025713/2021	EPI_ISL_3506121	2021-07-07	Europe / Estonia / Northern Estonia	Human			Female	50	Symptomatic		Original	Nasopharengeal swab		AY.122	GK	G142D,P681R,R158del,F157del,T19R,D950N,E156G,T478K,D614G,L452R)	delta
hCoV-19/Estonia/RC0025170/2021	EPI_ISL_3506129	2021-07-05	Europe / Estonia / Northern Estonia	Human			Female	28	Symptomatic		Original	Nasopharengeal swab		AY.122	GK	G142D,P681R,R158del,F157del,T19R,D950N,E156G,T478K,D614G,L452R)	delta
hCoV-19/Estonia/RC0026050/2021	EPI_ISL_3506114	2021-07-07	Europe / Estonia / Northern Estonia	Human			Male	12	Symptomatic		Original	Nasopharengeal swab		AY.122	GK	G142D,P681R,R158del,F157del,T19R,D950N,E156G,T478K,D614G,L452R)	delta
hCoV-19/Estonia/16783010/2021	EPI_ISL_3506113	2021-07-07	Europe / Estonia / Southern Estonia	Human			Female	34	Symptomatic		Original	Nasopharengeal swab		AY.122	GK	G142D,P681R,R158del,F157del,T19R,D950N,G446V,E156G,T478K,D614G,L452R)	delta
hCoV-19/Estonia/RC0025196/2021	EPI_ISL_3506118	2021-07-06	Europe / Estonia / Northern Estonia	Human			Female	66	Symptomatic		Original	Nasopharengeal swab		AY.122	GK	G142D,P681R,R158del,F157del,T19R,D950N,G446V,E156G,T547I,T478K,D614G,L452R)	delta
hCoV-19/Estonia/17154013/2021	EPI_ISL_3506117	2021-07-08	Europe / Estonia / Western Estonia	Human			Female	31	Symptomatic		Original	Nasopharengeal swab		AY.122	GK	G142D,S680P,P681R,R158del,F157del,T19R,D950N,E156G,T478K,D614G,L452R)	delta
hCoV-19/Estonia/RC0024570/2021	EPI_ISL_3506116	2021-07-03	Europe / Estonia / Northern Estonia	Human			Female	20	Symptomatic		Original	Nasopharengeal swab		AY.122	GK	G142D,P681R,R158del,F157del,T19R,D950N,E156G,T478K,D614G,L452R)	delta
hCoV-19/Estonia/RC0023537/2021	EPI_ISL_3506137	2021-06-30	Europe / Estonia	Human			Male	18	Symptomatic		Original	Nasopharengeal swab		B.1.617.2	GK	T95I,G142D,P681R,R158del,F157del,T19R,D950N,E156G,T478K,D614G,L452R)	delta
hCoV-19/Estonia/17154027/2021	EPI_ISL_3506134	2021-07-08	Europe / Estonia / Western Estonia	Human			Male	28	Symptomatic		Original	Nasopharengeal swab		AY.122	GK	G142D,S680P,P681R,R158del,F157del,T19R,D950N,E156G,T478K,D614G,L452R)	delta
hCoV-19/Estonia/RC0024645/2021	EPI_ISL_3506132	2021-07-03	Europe / Estonia / Northern Estonia	Human			Female	21	Symptomatic		Original	Nasopharengeal swab		AY.122	GK	G142D,P681R,R158del,F157del,T19R,D950N,E156G,T478K,D614G,L452R)	delta
hCoV-19/Estonia/17123869/2021	EPI_ISL_3506130	2021-07-07	Europe / Estonia / Western Estonia	Human			Female	31	Symptomatic		Original	Nasopharengeal swab		AY.122	GK	G142D,S680P,P681R,R158del,F157del,T19R,D950N,E156G,T478K,D614G,L452R	delta
hCoV-19/Estonia/16846822/2021	EPI_ISL_3506138	2021-07-05	Europe / Estonia	Human			Female	55	Symptomatic		Original	Nasopharengeal swab		AY.122	GK	G142D,P681R,R158del,F157del,T19R,D950N,E156G,T478K,D614G,L452R)	delta
hCoV-19/Estonia/16843361/2021	EPI_ISL_3506109	2021-07-03	Europe / Estonia	Human			Male	3	Asymptomatic		Original	Nasopharengeal swab		AY.122	GK	G142D,P681R,R158del,F157del,T19R,D950N,G446V,E156G,T478K,D614G,L452R)	delta
hCoV-19/Estonia/17359698/2021	EPI_ISL_3506003	2021-06-28	Europe / Estonia	Human			Female	53	Symptomatic		Original	Nasopharengeal swab		AY.122	GK	G142D,P681R,R158del,F157del,T19R,W1214F,D950N,E156G,T478K,D614G,L452R	delta
hCoV-19/Estonia/RC0023747/2021	EPI_ISL_3506025	2021-07-01	Europe / Estonia / Northern Estonia	Human			Female	56	Symptomatic		Original	Nasopharengeal swab		AY.122	GK	G142D,P681R,R158del,F157del,T19R,D950N,E156G,T478K,D614G,L452R)	delta
hCoV-19/Estonia/RC0023213/2021	EPI_ISL_3506023	2021-06-30	Europe / Estonia / Northern Estonia	Human			Male	52	Symptomatic		Original	Nasopharengeal swab		AY.122	GK	G142D,S680P,P681R,R158del,F157del,T19R,D950N,L938F,E156G,T478K,D614G,L452R)	delta
hCoV-19/Estonia/17380031/2021	EPI_ISL_3506022	2021-07-04	Europe / Estonia / Northern Estonia	Human			Female	42	Symptomatic		Original	Nasopharengeal swab		AY.122	GK	G142D,P681R,R158del,F157del,T19R,D950N,E156G,T478K,D614G,L452R	delta
hCoV-19/Estonia/17359743/2021	EPI_ISL_3506021	2021-06-30	Europe / Estonia	Human			Female	67	Symptomatic		Original	Nasopharengeal swab		B.1.617.2	GK	T95I,G142D,P681R,R158del,F157del,T19R,D950N,E156G,T478K,D614G,L452R)	delta
hCoV-19/Estonia/17359520/2021	EPI_ISL_3506020	2021-07-02	Europe / Estonia	Human			Male	21	Symptomatic		Original	Nasopharengeal swab		AY.122	GK	G142D,P681R,R158del,F157del,T19R,D950N,E156G,T478K,D614G,L452R)	delta
hCoV-19/Estonia/RC0023855/2021	EPI_ISL_3506029	2021-07-01	Europe / Estonia / Northern Estonia	Human			Male	45	Symptomatic		Original	Nasopharengeal swab		AY.122	GK	G142D,P681R,R158del,F157del,T19R,A222V,D950N,E324Q,E156G,T478K,D614G,L452R)	delta
hCoV-19/Estonia/17318100/2021	EPI_ISL_3506014	2021-07-03	Europe / Estonia / Northern Estonia	Human			Male	46	Symptomatic		Original	Nasopharengeal swab		AY.122	GK	G142D,P681R,R158del,F157del,T19R,D950N,E156G,T478K,D614G,L452R)	delta
hCoV-19/Estonia/17086485/2021	EPI_ISL_3506013	2021-07-01	Europe / Estonia / Northern Estonia	Human			Female	63	Symptomatic		Original	Nasopharengeal swab		AY.122	GK	G142D,P681R,R158del,F157del,T19R,D950N,E156G,T478K,D614G,L452R)	delta
hCoV-19/Estonia/17145036/2021	EPI_ISL_3506012	2021-06-28	Europe / Estonia / Southern Estonia	Human			Male	14	Symptomatic		Original	Nasopharengeal swab		AY.112	GK	T95I,P681R,Y144del,T19R,D950N,T478K,D614G,L452R)	delta
hCoV-19/Estonia/17330917/2021	EPI_ISL_3506019	2021-07-04	Europe / Estonia / Northern Estonia	Human			Male	75	Symptomatic		Original	Nasopharengeal swab		AY.122	GK	G142D,P681R,R158del,F157del,T19R,D950N,E156G,T478K,D614G,L452R	delta
hCoV-19/Estonia/17319994/2021	EPI_ISL_3506018	2021-07-02	Europe / Estonia / Southern Estonia	Human			Male	45	Symptomatic		Original	Nasopharengeal swab		B.1.617.2	GK	T95I,G142D,P681R,R158del,F157del,T19R,D950N,E156G,T478K,D614G,L452R)	delta
hCoV-19/Estonia/17319851/2021	EPI_ISL_3506017	2021-07-03	Europe / Estonia / Southern Estonia	Human			Male	17	Symptomatic		Original	Nasopharengeal swab		AY.122	GK	G142D,P681R,R158del,F157del,T19R,P812L,D950N,E156G,T478K,D614G,L452R)	delta
hCoV-19/Estonia/RC0026218/2021	EPI_ISL_3506089	2021-07-07	Europe / Estonia / Northern Estonia	Human			Male	29	Symptomatic		Original	Nasopharengeal swab		AY.122	GK	G142D,P681R,R158del,F157del,T19R,D950N,E156G,T478K,D614G,L452R)	delta
hCoV-19/Estonia/RC0026071/2021	EPI_ISL_3506088	2021-07-07	Europe / Estonia / Northern Estonia	Human			Female	38	Symptomatic		Original	Nasopharengeal swab		AY.122	GK	G142D,P681R,R158del,F157del,T19R,D950N,E156G,T478K,D614G,L452R)	delta
hCoV-19/Estonia/RC0025780/2021	EPI_ISL_3506083	2021-07-07	Europe / Estonia / Northern Estonia	Human			Male	39	Symptomatic		Original	Nasopharengeal swab		AY.122	GK	G142D,P681R,R158del,F157del,T19R,D950N,E156G,T478K,D614G,L452R)	delta
hCoV-19/Estonia/RC0025775/2021	EPI_ISL_3506082	2021-07-06	Europe / Estonia / Northern Estonia	Human			Female	19	Symptomatic		Original	Nasopharengeal swab		AY.122	GK	G142D,P681R,R158del,F157del,T19R,D950N,E156G,T478K,D614G,L452R)	delta
hCoV-19/Estonia/RC0025691/2021	EPI_ISL_3506078	2021-07-06	Europe / Estonia / Northern Estonia	Human			Female	45	Symptomatic		Original	Nasopharengeal swab		AY.122	GK	G142D,P681R,R158del,F157del,T19R,D950N,E156G,T478K,D614G,L452R)	delta
hCoV-19/Estonia/RC0025595/2021	EPI_ISL_3506077	2021-07-07	Europe / Estonia / Northern Estonia	Human			Male	29	Symptomatic		Original	Nasopharengeal swab		AY.122	GK	G142D,P681R,R158del,F157del,T19R,D950N,E156G,T478K,D614G,L452R)	delta
hCoV-19/Estonia/RC0025584/2021	EPI_ISL_3506076	2021-07-07	Europe / Estonia / Northern Estonia	Human			Male	81	Symptomatic		Original	Nasopharengeal swab		AY.122	GK	G142D,P681R,R158del,F157del,T19R,D950N,E156G,T478K,D614G,L452R)	delta
hCoV-19/Estonia/RC0025536/2021	EPI_ISL_3506074	2021-07-06	Europe / Estonia / Northern Estonia	Human			Female	42	Symptomatic		Original	Nasopharengeal swab		AY.122	GK	G142D,S680P,P681R,R158del,F157del,T19R,D950N,E156G,T478K,D614G,L452R)	delta
hCoV-19/Estonia/RC0025259/2021	EPI_ISL_3506070	2021-07-05	Europe / Estonia / Northern Estonia	Human			Male	36	Symptomatic		Original	Nasopharengeal swab		AY.122	GK	G142D,P681R,R158del,F157del,T19R,D950N,E156G,T478K,D614G,L452R)	delta
hCoV-19/Estonia/16846828/2021	EPI_ISL_3506048	2021-07-05	Europe / Estonia	Human			Male	42	Symptomatic		Original	Nasopharengeal swab		AY.122	GK	G142D,P681R,R158del,F157del,T19R,D950N,E156G,T478K,D614G,L452R)	delta
hCoV-19/Estonia/16775928/2021	EPI_ISL_3506047	2021-07-06	Europe / Estonia	Human			Male	23	Symptomatic		Original	Nasopharengeal swab		AY.122	GK	G142D,S680P,P681R,R158del,F157del,T19R,D950N,E156G,T478K,D614G,L452R)	delta
hCoV-19/Estonia/16572639/2021	EPI_ISL_3506046	2021-07-07	Europe / Estonia / Southern Estonia	Human			Male	47	Symptomatic		Original	Nasopharengeal swab		B.1.617.2	GK	T95I,G142D,P681R,R158del,F157del,T19R,D950N,E156G,T478K,D614G,L452R)	delta
hCoV-19/Estonia/16473003/2021	EPI_ISL_3506045	2021-07-07	Europe / Estonia / Northern Estonia	Human			Male	50	Symptomatic		Original	Nasopharengeal swab		AY.122	GK	G142D,P681R,R158del,F157del,T19R,D950N,E156G,T478K,D614G,L452R)	delta
hCoV-19/Estonia/15114051/2021	EPI_ISL_3506044	2021-07-07	Europe / Estonia / Northern Estonia	Human			Female	40	Asymptomatic		Original	Nasopharengeal swab		AY.122	GK	G142D,S680P,P681R,R158del,F157del,T19R,D950N,L938F,E156G,T478K,D614G,L452R)	delta
hCoV-19/Estonia/RC0024644/2021	EPI_ISL_3506043	2021-07-04	Europe / Estonia / Northern Estonia	Human			Female	9	Symptomatic		Original	Nasopharengeal swab		AY.122	GK	G142D,S680P,P681R,R158del,F157del,T19R,D950N,L938F,E156G,T478K,D614G,L452R)	delta
hCoV-19/Estonia/RC0024439/2021	EPI_ISL_3506042	2021-07-03	Europe / Estonia / Northern Estonia	Human			Male	11	Symptomatic		Original	Nasopharengeal swab		AY.122	GK	G142D,S680P,P681R,R158del,F157del,T19R,D950N,L938F,E156G,T478K,D614G,L452R)	delta
hCoV-19/Estonia/RC0024188/2021	EPI_ISL_3506038	2021-07-03	Europe / Estonia / Northern Estonia	Human			Male	58	Symptomatic		Original	Nasopharengeal swab		AY.122	GK	G142D,P681R,R158del,F157del,T19R,D950N,E156G,T478K,D614G,L452R)	delta
hCoV-19/Estonia/RC0024166/2021	EPI_ISL_3506037	2021-07-02	Europe / Estonia / Northern Estonia	Human			Female	30	Symptomatic		Original	Nasopharengeal swab		AY.122	GK	G142D,P681R,R158del,F157del,T19R,D950N,E156G,T478K,D614G,L452R)	delta
hCoV-19/Estonia/RC0024165/2021	EPI_ISL_3506036	2021-07-02	Europe / Estonia / Northern Estonia	Human			Female	27	Symptomatic		Original	Nasopharengeal swab		AY.122	GK	G142D,P681R,R158del,F157del,T19R,D950N,E156G,T478K,D614G,L452R)	delta
hCoV-19/Estonia/RC0024113/2021	EPI_ISL_3506034	2021-07-02	Europe / Estonia / Northern Estonia	Human			Male	39	Symptomatic		Original	Nasopharengeal swab		AY.4	GK	T95I,G142D,P681R,R158del,F157del,T19R,D950N,E156G,C1236Y,T478K,D614G,L452R)	delta
hCoV-19/Estonia/RC0023965/2021	EPI_ISL_3506033	2021-07-02	Europe / Estonia / Northern Estonia	Human			Male	18	Symptomatic		Original	Nasopharengeal swab		AY.122	GK	G142D,P681R,R158del,F157del,T19R,D950N,E156G,T478K,D614G,L452R	delta
hCoV-19/Estonia/RC0023915/2021	EPI_ISL_3506032	2021-07-01	Europe / Estonia / Northern Estonia	Human			Female	21	Symptomatic		Original	Nasopharengeal swab		AY.122	GK	G142D,P681R,R158del,F157del,T19R,D950N,E156G,T478K,D614G,L452R)	delta
hCoV-19/Estonia/RC0023914/2021	EPI_ISL_3506031	2021-07-01	Europe / Estonia / Northern Estonia	Human			Male	28	Symptomatic		Original	Nasopharengeal swab		AY.122	GK	G142D,P681R,R158del,F157del,T19R,D950N,E156G,T478K,D614G,L452R)	delta
hCoV-19/Estonia/RC0023871/2021	EPI_ISL_3506030	2021-07-01	Europe / Estonia / Northern Estonia	Human			Female	47	Symptomatic		Original	Nasopharengeal swab		AY.122	GK	G142D,P681R,R158del,F157del,T19R,D950N,E156G,T478K,D614G,L452R)	delta
hCoV-19/Estonia/RC0024240/2021	EPI_ISL_3506039	2021-07-03	Europe / Estonia / Northern Estonia	Human			Female	32	Symptomatic		Original	Nasopharengeal swab		AY.122	GK	G142D,P681R,R158del,F157del,T19R,D950N,E156G,T478K,D614G,L452R)	delta
hCoV-19/Estonia/RC0025131/2021	EPI_ISL_3506068	2021-07-05	Europe / Estonia / Northern Estonia	Human			Male	34	Symptomatic		Original	Nasopharengeal swab		AY.122	GK	G142D,P681R,R158del,F157del,T19R,D950N,E156G,T478K,D614G,L452R,V62F)	delta
hCoV-19/Estonia/RC0025063/2021	EPI_ISL_3506067	2021-07-05	Europe / Estonia / Northern Estonia	Human			Female	35	Symptomatic		Original	Nasopharengeal swab		AY.122	GK	G142D,P681R,R158del,F157del,T19R,D950N,E156G,T478K,D614G,L452R)	delta
hCoV-19/Estonia/RC0024993/2021	EPI_ISL_3506066	2021-07-05	Europe / Estonia / Northern Estonia	Human			Female	44	Symptomatic		Original	Nasopharengeal swab		AY.4	GK	T95I,G142D,P681R,R158del,F157del,T19R,D950N,E156G,T478K,D614G,L452R)	delta
hCoV-19/Estonia/RC0024836/2021	EPI_ISL_3506064	2021-07-04	Europe / Estonia / Northern Estonia	Human			Male	24	Symptomatic		Original	Nasopharengeal swab		AY.122	GK	G142D,P681R,R158del,F157del,T19R,D950N,E156G,T478K,D614G,L452R)	delta
hCoV-19/Estonia/RC0024834/2021	EPI_ISL_3506063	2021-07-04	Europe / Estonia / Northern Estonia	Human			Male	21	Symptomatic		Original	Nasopharengeal swab		AY.122	GK	G142D,S680P,P681R,R158del,F157del,T19R,D950N,E156G,T478K,D614G,L452R)	delta
hCoV-19/Estonia/RC0024677/2021	EPI_ISL_3506062	2021-07-04	Europe / Estonia / Northern Estonia	Human			Female	32	Symptomatic		Original	Nasopharengeal swab		AY.122	GK	G142D,P681R,R158del,F157del,T19R,D950N,E156G,T478K,D614G,L452R	delta
hCoV-19/Estonia/RC0022001/2021	EPI_ISL_3506061	2021-06-27	Europe / Estonia / Northern Estonia	Human			Male	24	Symptomatic		Original	Nasopharengeal swab		AY.122	GK	G142D,P681R,R158del,F157del,T19R,D950N,E156G,T478K,D614G,L452R)	delta
hCoV-19/Estonia/17330885/2021	EPI_ISL_3506060	2021-07-07	Europe / Estonia	Human			Male	15	Symptomatic		Original	Nasopharengeal swab		AY.122	GK	G142D,P681R,R158del,F157del,T19R,D950N,E156G,T478K,D614G,L452R)	delta
hCoV-19/Estonia/17330884/2021	EPI_ISL_3506059	2021-07-07	Europe / Estonia / Western Estonia	Human			Male	6	Symptomatic		Original	Nasopharengeal swab		AY.122	GK	G142D,P681R,R158del,F157del,T19R,D950N,E156G,T478K,D614G,L452R)	delta
hCoV-19/Estonia/17330878/2021	EPI_ISL_3506058	2021-07-07	Europe / Estonia / Western Estonia	Human			Male	2	Symptomatic		Original	Nasopharengeal swab		AY.122	GK	G142D,P681R,R158del,F157del,T19R,D950N,E156G,T478K,D614G,L452R)	delta
hCoV-19/Estonia/17318372/2021	EPI_ISL_3506057	2021-07-07	Europe / Estonia	Human			Female	59	Symptomatic		Original	Nasopharengeal swab		AY.122	GK	D88Y,G142D,P681R,R158del,F157del,T19R,D950N,E156G,T478K,D614G,L452R)	delta
hCoV-19/Estonia/17318072/2021	EPI_ISL_3506055	2021-07-07	Europe / Estonia	Human			Female	53	Symptomatic		Original	Nasopharengeal swab		AY.122	GK	G142D,P681R,R158del,F157del,T19R,D950N,E156G,T478K,D614G,L452R)	delta
hCoV-19/Estonia/17123867/2021	EPI_ISL_3506052	2021-07-07	Europe / Estonia / Northern Estonia	Human			Female	60	Symptomatic		Original	Nasopharengeal swab		AY.122	GK	G142D,S680P,P681R,R158del,F157del,T19R,D950N,L938F,E156G,T478K,D614G,L452R)	delta
hCoV-19/Estonia/17123860/2021	EPI_ISL_3506050	2021-07-08	Europe / Estonia / Western Estonia	Human			Male	52	Symptomatic		Original	Nasopharengeal swab		AY.122	GK	G142D,S680P,P681R,R158del,F157del,T19R,D950N,E156G,T478K,D614G,L452R)	delta
hCoV-19/Belgium/IPG-521/2021	EPI_ISL_3508107	2021-08-10	Europe / Belgium / Wallonie	Human	ZIP: 6210		Male	0	Symptomatic		Original	Nasopharyngeal swab	surveillance	AY.43	GK	P681R,R158del,F157del,T19R,D950N,E156G,T478K,D614G,L452R	delta
hCoV-19/Belgium/IPG-522/2021	EPI_ISL_3508108	2021-08-10	Europe / Belgium / Wallonie	Human	ZIP: 6031		Male	22	Symptomatic		Original	Nasopharyngeal swab	surveillance	AY.43	GK	P681R,R158del,F157del,T19R,D950N,E156G,T478K,D614G,L452R	delta
hCoV-19/Belgium/IPG-523/2021	EPI_ISL_3508109	2021-08-11	Europe / Belgium / Wallonie	Human	ZIP: 6031		Female	28	Symptomatic		Original	Nasopharyngeal swab	surveillance	AY.125	GK	P681R,R158del,F157del,T19R,D950N,E156G,T478K,D614G,L452R)	delta
hCoV-19/Belgium/IPG-514/2021	EPI_ISL_3508100	2021-08-02	Europe / Belgium / Wallonie	Human	ZIP: 34300		Male	24	Symptomatic		Original	Nasopharyngeal swab	surveillance	AY.42	GK	P681R,R158del,F157del,T19R,D950N,T719I,E156G,T478K,D614G,L452R)	delta
hCoV-19/Belgium/IPG-516/2021	EPI_ISL_3508102	2021-08-03	Europe / Belgium / Wallonie	Human	ZIP: 7900		Male	30	Symptomatic		Original	Nasopharyngeal swab	surveillance	AY.43	GK	P681R,T19R,D950N,T478K,T791I,D614G,L452R	delta
hCoV-19/Belgium/IPG-517/2021	EPI_ISL_3508103	2021-08-04	Europe / Belgium / Wallonie	Human	ZIP: 7608		Female	32	Symptomatic		Original	Nasopharyngeal swab	surveillance	AY.125	GK	P681R,R158del,F157del,T19R,D950N,E156G,T478K,D614G,L452R)	delta
hCoV-19/Belgium/IPG-519/2021	EPI_ISL_3508105	2021-08-09	Europe / Belgium / Wallonie	Human	ZIP: 7700		Male	30	Symptomatic		Original	Nasopharyngeal swab	surveillance	B.1.617.2	GK	P681R,R158del,F157del,T19R,D950N,E156G,T478K,D614G,L452R)	delta
hCoV-19/Belgium/IPG-520/2021	EPI_ISL_3508106	2021-08-10	Europe / Belgium / Wallonie	Human	ZIP: 7700		Female	34	Symptomatic		Original	Nasopharyngeal swab	surveillance	AY.43	GK	P681R,R158del,F157del,T19R,D950N,E156G,T478K,D614G,L452R	delta
hCoV-19/Belgium/IPG-536/2021	EPI_ISL_3508122	2021-08-11	Europe / Belgium / Wallonie	Human	ZIP: 6534		Female	25	Symptomatic		Original	Nasopharyngeal swab	surveillance	AY.70	GK	R21T,P681R,R158del,F157del,T19R,A222V,D950N,E156G,T478K,D614G,L452R)	delta
hCoV-19/Belgium/IPG-535/2021	EPI_ISL_3508121	2021-08-06	Europe / Belgium / Wallonie	Human	ZIP: 5651		Male	28	Symptomatic		Original	Nasopharyngeal swab	surveillance	AY.75	GK	P681R,R158del,F157del,T19R,A222V,D950N,E156G,T478K,D614G,L452R)	delta
hCoV-19/Belgium/IPG-532/2021	EPI_ISL_3508118	2021-08-07	Europe / Belgium / Wallonie	Human	ZIP: 5060		Female	8	Symptomatic		Original	Nasopharyngeal swab	surveillance	AY.70	GK	R21T,P681R,R158del,F157del,T19R,A222V,D950N,E156G,T478K,D614G,L452R)	delta
hCoV-19/Belgium/IPG-526/2021	EPI_ISL_3508112	2021-08-06	Europe / Belgium / Wallonie	Human	ZIP: 6060		Male	35	Symptomatic		Original	Nasopharyngeal swab	surveillance	AY.42	GK	P681R,R158del,F157del,T19R,D950N,T719I,E156G,T478K,D614G,L452R)	delta
hCoV-19/Belgium/IPG-525/2021	EPI_ISL_3508111	2021-08-10	Europe / Belgium / Wallonie	Human	ZIP: 6041		Male	42	Symptomatic		Original	Nasopharyngeal swab	surveillance	AY.42	GK	P681R,R158del,F157del,T19R,D950N,E156G,T478K,D614G,L452R)	delta
hCoV-19/Belgium/IPG-528/2021	EPI_ISL_3508114	2021-08-02	Europe / Belgium / Wallonie	Human	ZIP: 7500		Female	69	Symptomatic		Original	Nasopharyngeal swab	surveillance	AY.9.2	GK	P681R,R158del,F157del,T19R,A222V,D950N,E156G,T478K,D614G,L452R)	delta
hCoV-19/Belgium/IPG-529/2021	EPI_ISL_3508115	2021-08-11	Europe / Belgium / Wallonie	Human	ZIP: 6030		Female	14	Symptomatic		Original	Nasopharyngeal swab	surveillance	AY.9.2	GK	P681R,R158del,F157del,T19R,A222V,D950N,E156G,T478K,D614G,L452R)	delta
hCoV-19/Belgium/IPG-530/2021	EPI_ISL_3508116	2021-08-10	Europe / Belgium / Wallonie	Human	ZIP: 5620		Female	21	Symptomatic		Original	Nasopharyngeal swab	surveillance	AY.98.1	GK	P251L,P681R,R158del,F157del,T19R,D950N,E156G,T478K,D614G,L452R	delta
hCoV-19/Estonia/RC0024961/2021	EPI_ISL_3506120	2021-07-05	Europe / Estonia / Northern Estonia	Human			Male	30	Symptomatic		Original	Nasopharengeal swab		AY.122	GK	G142D,S680P,P681R,R158del,F157del,T19R,D950N,E156G,T478K,D614G,L452R)	delta
hCoV-19/Italy/APU-IZSPB-1987PT/2021	EPI_ISL_3485779	2021-07-21	Europe / Italy / Apulia / Brindisi / Brindisi	Human			Female	58	Paucisymptomatic		Original	Nasopharyngeal Swab		AY.42	GK	P681R,T19R,T478K,D614G,L452R	delta
hCoV-19/Estonia/17111582/2021	EPI_ISL_3506049	2021-07-06	Europe / Estonia / Southern Estonia	Human			Male	36	Symptomatic		Original	Nasopharengeal swab		AY.122	GK	G142D,P681R,R158del,F157del,T19R,D950N,E156G,T478K,D614G,L452R	delta
hCoV-19/Estonia/16783009/2021	EPI_ISL_3506112	2021-07-08	Europe / Estonia / Southern Estonia	Human			Male	3	Symptomatic		Original	Nasopharengeal swab		AY.122	GK	G142D,P681R,R158del,F157del,T19R,D950N,G446V,E156G,T478K,D614G,L452R)	delta
hCoV-19/Estonia/RC0025757/2021	EPI_ISL_3506081	2021-07-07	Europe / Estonia / Northern Estonia	Human			Male	23	Symptomatic		Original	Nasopharengeal swab		AY.122	GK	G142D,P681R,R158del,F157del,T19R,D950N,E156G,T478K,D614G,L452R)	delta
hCoV-19/Estonia/RC0025936/2021	EPI_ISL_3506085	2021-07-07	Europe / Estonia / Northern Estonia	Human			Female	30	Symptomatic		Original	Nasopharengeal swab		AY.122	GK	G142D,P681R,R158del,F157del,T19R,D950N,E156G,T478K,D614G,L452R)	delta
hCoV-19/Estonia/RC0025848/2021	EPI_ISL_3506084	2021-07-06	Europe / Estonia / Northern Estonia	Human			Male	35	Symptomatic		Original	Nasopharengeal swab		AY.122	GK	G142D,P681R,R158del,F157del,T19R,D950N,E156G,T478K,D614G,L452R	delta
hCoV-19/Estonia/RC0025985/2021	EPI_ISL_3506086	2021-07-07	Europe / Estonia / Northern Estonia	Human			Female	12	Symptomatic		Original	Nasopharengeal swab		AY.122	GK	G142D,P681R,R158del,F157del,T19R,D950N,E156G,T478K,D614G,L452R)	delta
hCoV-19/Estonia/RC0026068/2021	EPI_ISL_3506127	2021-07-07	Europe / Estonia / Northern Estonia	Human			Female	15	Symptomatic		Original	Nasopharengeal swab		AY.122	GK	G142D,S680P,P681R,R158del,F157del,T19R,D950N,E156G,T478K,D614G,L452R)	delta
hCoV-19/Estonia/16581024/2021	EPI_ISL_3506111	2021-07-08	Europe / Estonia / Southern Estonia	Human			Female	67	Symptomatic		Original	Nasopharengeal swab		AY.122	GK	G142D,P681R,R158del,F157del,T19R,D950N,G446V,E156G,T478K,D614G,L452R)	delta
hCoV-19/Estonia/RC0025052/2021	EPI_ISL_3506136	2021-07-05	Europe / Estonia / Northern Estonia	Human			Female	40	Symptomatic		Original	Nasopharengeal swab		AY.122	GK	G142D,P681R,R158del,F157del,T19R,D950N,E156G,T478K,D614G,L452R)	delta
hCoV-19/Estonia/17318101/2021	EPI_ISL_3506015	2021-07-03	Europe / Estonia	Human			Female	66	Symptomatic		Original	Nasopharengeal swab		AY.122	GK	G142D,P681R,R158del,F157del,T19R,D950N,E156G,T478K,D614G,L452R	delta
hCoV-19/Estonia/RC0023702/2021	EPI_ISL_3506024	2021-07-01	Europe / Estonia / Northern Estonia	Human			Female	33	Symptomatic		Original	Nasopharengeal swab		AY.122	GK	G142D,P681R,R158del,F157del,T19R,D950N,E156G,T478K,D614G,L452R)	delta
hCoV-19/Estonia/17318123/2021	EPI_ISL_3506016	2021-07-03	Europe / Estonia	Human			Female	38	Symptomatic		Original	Nasopharengeal swab		AY.122	GK	G142D,P681R,R158del,F157del,T19R,D950N,E156G,T478K,D614G,L452R)	delta
hCoV-19/Estonia/RC0023782/2021	EPI_ISL_3506028	2021-07-01	Europe / Estonia / Northern Estonia	Human			Male	22	Symptomatic		Original	Nasopharengeal swab		AY.122	GK	G142D,P681R,R158del,F157del,T19R,A222V,D950N,E324Q,E156G,T478K,D614G,L452R)	delta
hCoV-19/Estonia/RC0023781/2021	EPI_ISL_3506027	2021-07-01	Europe / Estonia / Northern Estonia	Human			Male	11	Symptomatic		Original	Nasopharengeal swab		AY.122	GK	G142D,P681R,R158del,F157del,T19R,A222V,D950N,E324Q,E156G,T478K,D614G,L452R)	delta
hCoV-19/Estonia/RC0025155/2021	EPI_ISL_3506069	2021-07-05	Europe / Estonia / Northern Estonia	Human			Female	20	Symptomatic		Original	Nasopharengeal swab		AY.122	GK	G142D,P681R,R158del,F157del,T19R,D950N,E156G,T478K,D614G,L452R)	delta
hCoV-19/Belgium/IPG-533/2021	EPI_ISL_3508119	2021-08-11	Europe / Belgium / Wallonie	Human	ZIP: 6043		Male	61	Symptomatic		Original	Nasopharyngeal swab	surveillance	AY.66	GK	P681R,T19R,D950N,P1079T,T478K,D614G,L452R)	delta
hCoV-19/Belgium/IPG-534/2021	EPI_ISL_3508120	2021-08-09	Europe / Belgium / Wallonie	Human	ZIP: 5651		Female	65	Symptomatic		Original	Nasopharyngeal swab	surveillance	AY.66	GK	P681R,R158del,F157del,T19R,A222V,D950N,E156G,T478K,D614G,L452R)	delta
hCoV-19/Estonia/RC0025573/2021	EPI_ISL_3506075	2021-07-06	Europe / Estonia / Northern Estonia	Human			Male	38	Symptomatic		Original	Nasopharengeal swab		AY.122	GK	G142D,P681R,R158del,F157del,T19R,D950N,E156G,T478K,D614G,L452R)	delta
hCoV-19/Belgium/IPG-515/2021	EPI_ISL_3508101	2021-08-03	Europe / Belgium / Wallonie	Human	ZIP: 7500		Male	31	Symptomatic		Original	Nasopharyngeal swab	surveillance	AY.36	GK	P681R,R158del,F157del,T19R,D950N,E156G,T478K,D614G,V1104L,L452R	delta
hCoV-19/Italy/APU-IZSPB-2008PT/2021	EPI_ISL_3485792	2021-07-23	Europe / Italy / Apulia / Brindisi / Brindisi	Human			Male	13	Asymptomatic		Original	Nasopharyngeal Swab		AY.98.1	GK	P251L,P681R,T19R,T478K,D614G,L452R	delta
hCoV-19/Italy/APU-IZSPB-1994PT/2021	EPI_ISL_3485782	2021-07-22	Europe / Italy / Apulia / Brindisi / Brindisi	Human			Female	43	Asymptomatic		Original	Nasopharyngeal Swab		AY.43	GK	P681R,T19R,T478K,D614G,L452R	delta
hCoV-19/Italy/APU-IZSPB-2001PT/2021	EPI_ISL_3485787	2021-07-22	Europe / Italy / Apulia / Brindisi / Brindisi	Human			Female	19	Paucisymptomatic		Original	Nasopharyngeal Swab		AY.43	GK	V308L,P681R,T19R,T478K,D614G,L452R	delta
hCoV-19/Italy/APU-IZSPB-2013PT/2021	EPI_ISL_3485794	2021-07-24	Europe / Italy / Apulia / Brindisi / Brindisi	Human			Female	20	Paucisymptomatic		Original	Nasopharyngeal Swab		AY.43	GK	V308L,P681R,T19R,T478K,D614G,L452R	delta
hCoV-19/Italy/APU-IZSPB-2181PT/2021	EPI_ISL_3485801	2021-07-30	Europe / Italy / Apulia / Brindisi / Brindisi	Human			Female	19	Paucisymptomatic		Original	Nasopharyngeal Swab		AY.4.7	GK	P681R,T19R,T478K,D614G,L452R	delta
hCoV-19/Italy/APU-IZSPB-2189PT/2021	EPI_ISL_3485808	2021-08-01	Europe / Italy / Apulia / Brindisi / Brindisi	Human			Female	35	Paucisymptomatic		Original	Nasopharyngeal Swab		AY.112	GK	T478K,P681R,D614G,L452R,T19R	delta
hCoV-19/Italy/APU-IZSPB-2197PT/2021	EPI_ISL_3485817	2021-07-27	Europe / Italy / Apulia / Brindisi / Brindisi	Human			Female	16	Paucisymptomatic		Original	Nasopharyngeal Swab		AY.5	GK	P681R,T19R,T478K,D614G,L452R	delta
hCoV-19/Italy/APU-IZSPB-2203PT/2021	EPI_ISL_3485825	2021-07-27	Europe / Italy / Apulia / Brindisi / Brindisi	Human			Female	28	Paucisymptomatic		Original	Nasopharyngeal Swab		AY.43	GK	P681R,T19R,T478K,D614G,L452R	delta
hCoV-19/Italy/APU-IZSPB-2211PT/2021	EPI_ISL_3485827	2021-07-28	Europe / Italy / Apulia / Brindisi / Brindisi	Human			Female	18	Asymptomatic		Original	Nasopharyngeal Swab		AY.5	GK	P681R,T19R,T478K,D614G,L452R	delta
hCoV-19/Italy/APU-IZSPB-2217PT/2021	EPI_ISL_3485829	2021-07-29	Europe / Italy / Apulia / Brindisi / Brindisi	Human			Male	20	Paucisymptomatic		Original	Nasopharyngeal Swab		AY.5	GK	P681R,T19R,T478K,D614G,L452R	delta
hCoV-19/Italy/APU-IZSPB-2230PT/2021	EPI_ISL_3485833	2021-07-31	Europe / Italy / Apulia / Brindisi / Brindisi	Human			Male	16	Paucisymptomatic		Original	Nasopharyngeal Swab		AY.5	GK	P681R,T19R,N556K,T478K,D614G,L452R	delta
hCoV-19/Italy/APU-IZSPB-2231PT/2021	EPI_ISL_3485834	2021-07-31	Europe / Italy / Apulia / Brindisi / Brindisi	Human			Female	20	Asymptomatic		Original	Nasopharyngeal Swab		AY.25.1	GK	P681R,T19R,T478K,D614G,L452R	delta
hCoV-19/Italy/APU-IZSPB-2238PT/2021	EPI_ISL_3485839	2021-07-30	Europe / Italy / Apulia / Brindisi / Brindisi	Human			Female	14	Paucisymptomatic		Original	Nasopharyngeal Swab		AY.5	GK	P681R,T19R,T478K,D614G,L452R	delta
hCoV-19/Italy/APU-IZSPB-2240PT/2021	EPI_ISL_3485842	2021-07-30	Europe / Italy / Apulia / Brindisi / Brindisi	Human			Female	42	Asymptomatic		Original	Nasopharyngeal Swab		AY.120	GK	P681R,T19R,T478K,D614G,V6F,L452R	delta
hCoV-19/Italy/APU-IZSPB-2241PT/2021	EPI_ISL_3485844	2021-07-30	Europe / Italy / Apulia / Brindisi / Brindisi	Human			Male	31	Asymptomatic		Original	Nasopharyngeal Swab		AY.42	GK	P681R,T19R,T478K,D614G,L452R	delta
hCoV-19/Italy/APU-IZSPB-2078PT/2021	EPI_ISL_3485862	2021-07-23	Europe / Italy / Apulia / Foggia / Foggia	Human			Male	15	Asymptomatic		Original	Nasopharyngeal Swab		AY.46.6	GK	P681R,T19R,D950N,T478K,D614G,L452R	delta
hCoV-19/Italy/APU-IZSPB-2097PT/2021	EPI_ISL_3485886	2021-08-01	Europe / Italy / Apulia / Lecce / Lecce	Human			Female	37	Paucisymptomatic		Original	Nasopharyngeal Swab		AY.33	GK	T250I,P681R,T19R,T29A,T478K,D614G,L452R	delta
hCoV-19/Italy/APU-IZSPB-2118PT/2021	EPI_ISL_3485892	2021-07-27	Europe / Italy / Apulia / Lecce / Lecce	Human			Male	49	Asymptomatic		Original	Nasopharyngeal Swab		AY.42	GK	P681R,T19R,T719I,T478K,D614G,L452R	delta
hCoV-19/Italy/APU-IZSPB-2110PT/2021	EPI_ISL_3485890	2021-07-22	Europe / Italy / Apulia / Lecce / Lecce	Human			Female	16	Asymptomatic		Original	Nasopharyngeal Swab		AY.42	GK	P681R,T19R,T478K,D614G,L452R,S813I)	delta
hCoV-19/Italy/APU-IZSPB-2147PT/2021	EPI_ISL_3485910	2021-07-31	Europe / Italy / Apulia / Lecce / Lecce	Human			Male	31	Asymptomatic		Original	Nasopharyngeal Swab		AY.43	GK	P681R,T19R,T478K,D614G,L452R	delta
hCoV-19/Italy/APU-IZSPB-2157PT/2021	EPI_ISL_3485912	2021-07-19	Europe / Italy / Apulia / Lecce / Lecce	Human			Female	26	Asymptomatic		Original	Nasopharyngeal Swab		AY.43	GK	P681R,T19R,T478K,D614G,L452R	delta
hCoV-19/Italy/APU-IZSPB-2245PT/2021	EPI_ISL_3485926	2021-07-27	Europe / Italy / Apulia / Taranto / Taranto	Human			Female	42	Asymptomatic		Original	Nasopharyngeal Swab		AY.42	GK	P681R,T19R,T478K,D614G,L452R	delta
hCoV-19/Italy/APU-IZSPB-2246PT/2021	EPI_ISL_3485928	2021-07-27	Europe / Italy / Apulia / Taranto / Taranto	Human			Female	34	Asymptomatic		Original	Nasopharyngeal Swab		AY.98.1	GK	P251L,P681R,T19R,T478K,D614G,L452R	delta
hCoV-19/Italy/APU-IZSPB-2254PT/2021	EPI_ISL_3485934	2021-07-28	Europe / Italy / Apulia / Taranto / Taranto	Human			Male	21	Asymptomatic		Original	Nasopharyngeal Swab		AY.124	GK	P681R,T19R,T478K,D614G,L452R	delta
hCoV-19/Estonia/RC0024263/2021	EPI_ISL_3506040	2021-07-03	Europe / Estonia / Northern Estonia	Human			Female	65	Symptomatic		Original	Nasopharengeal swab		AY.122	GK	G142D,P681R,R158del,F157del,T19R,D950N,E156G,T478K,D614G,L452R)	delta
hCoV-19/Estonia/RC0024328/2021	EPI_ISL_3506041	2021-07-03	Europe / Estonia / Northern Estonia	Human			Male	16	Symptomatic		Original	Nasopharengeal swab		AY.4	GK	T95I,G142D,P681R,R158del,F157del,T19R,D950N,E156G,C1236Y,T478K,D614G,L452R)	delta
hCoV-19/Estonia/17123866/2021	EPI_ISL_3506051	2021-07-07	Europe / Estonia / Western Estonia	Human			Female	5	Symptomatic		Original	Nasopharengeal swab		AY.122	GK	G142D,P681R,R158del,F157del,T19R,D950N,E156G,T478K,D614G,V1176F,L452R)	delta
hCoV-19/Estonia/17123878/2021	EPI_ISL_3506053	2021-07-08	Europe / Estonia / Western Estonia	Human			Male	42	Symptomatic		Original	Nasopharengeal swab		AY.122	GK	G142D,P681R,R158del,F157del,T19R,D950N,E156G,T478K,D614G,L452R	delta
hCoV-19/Estonia/RC0025373/2021	EPI_ISL_3506072	2021-07-06	Europe / Estonia / Northern Estonia	Human			Female	29	Symptomatic		Original	Nasopharengeal swab		AY.122	GK	G142D,P681R,R158del,F157del,T19R,D950N,E156G,T478K,D614G,L452R)	delta
hCoV-19/Estonia/RC0025711/2021	EPI_ISL_3506080	2021-07-07	Europe / Estonia / Northern Estonia	Human			Female	22	Symptomatic		Original	Nasopharengeal swab		AY.122	GK	G142D,P681R,R158del,F157del,T19R,D950N,E156G,T478K,D614G,L452R)	delta
hCoV-19/Estonia/RC0024142/2021	EPI_ISL_3506124	2021-07-02	Europe / Estonia / Northern Estonia	Human			Female	29	Symptomatic		Original	Nasopharengeal swab		AY.122	GK	G142D,P681R,R158del,F157del,T19R,D950N,E156G,T478K,D614G,L452R)	delta
hCoV-19/Estonia/RC0023370/2021	EPI_ISL_3506128	2021-06-30	Europe / Estonia / Northern Estonia	Human			Female	24	Symptomatic		Original	Nasopharengeal swab		AY.122	GK	G142D,P681R,R158del,F157del,T19R,D950N,E156G,T478K,D614G,L452R	delta
hCoV-19/Estonia/17318074/2021	EPI_ISL_3506133	2021-07-03	Europe / Estonia	Human			Male	20	Symptomatic		Original	Nasopharengeal swab		AY.122	GK	G142D,P681R,R158del,F157del,T19R,D950N,E156G,T478K,D614G,L452R)	delta
hCoV-19/Estonia/RC0025692/2021	EPI_ISL_3506079	2021-07-06	Europe / Estonia / Northern Estonia	Human			Female	20	Symptomatic		Original	Nasopharengeal swab		AY.122	GK	G142D,P681R,R158del,F157del,T19R,D950N,E156G,T478K,D614G,L452R)	delta
hCoV-19/Estonia/16843360/2021	EPI_ISL_3506108	2021-07-03	Europe / Estonia	Human			Female	29	Symptomatic		Original	Nasopharengeal swab		AY.122	GK	G142D,P681R,R158del,F157del,T19R,D950N,G446V,E156G,T478K,D614G,L452R)	delta
hCoV-19/Estonia/RC0023389/2021	EPI_ISL_3506110	2021-06-30	Europe / Estonia / Northern Estonia	Human			Female	54	Symptomatic		Original	Nasopharengeal swab		AY.122	GK	G142D,P681R,R158del,F157del,T19R,D950N,G446V,E156G,T547I,T478K,D614G,L452R)	delta
hCoV-19/Estonia/RC0021999/2021	EPI_ISL_3506115	2021-06-27	Europe / Estonia / Northern Estonia	Human			Female	49	Symptomatic		Original	Nasopharengeal swab		AY.122	GK	G142D,P681R,R158del,F157del,T19R,D950N,E156G,T478K,D614G,L452R)	delta
hCoV-19/Estonia/RC0023769/2021	EPI_ISL_3506119	2021-07-01	Europe / Estonia / Northern Estonia	Human			Female	43	Symptomatic		Original	Nasopharengeal swab		AY.122	GK	G142D,P681R,R158del,F157del,T19R,D950N,E156G,T478K,D614G,L452R)	delta
hCoV-19/Estonia/17362066/2021	EPI_ISL_3506139	2021-07-07	Europe / Estonia	Human			Female	20	Symptomatic		Original	Nasopharengeal swab		AY.122	GK	G142D,P681R,R158del,F157del,T19R,D950N,E156G,T478K,D614G,L452R	delta
hCoV-19/Estonia/RC0024894/2021	EPI_ISL_3506065	2021-07-04	Europe / Estonia / Northern Estonia	Human			Male	21	Symptomatic		Original	Nasopharengeal swab		AY.122	GK	G142D,P681R,R158del,F157del,T19R,D950N,E156G,T478K,D614G,L452R)	delta
hCoV-19/Estonia/RC0025371/2021	EPI_ISL_3506071	2021-07-05	Europe / Estonia / Northern Estonia	Human			Female	25	Symptomatic		Original	Nasopharengeal swab		AY.122	GK	G142D,P681R,R158del,F157del,T19R,D950N,E156G,T478K,D614G,L452R)	delta
hCoV-19/Estonia/RC0025463/2021	EPI_ISL_3506073	2021-07-05	Europe / Estonia / Northern Estonia	Human			Male	35	Symptomatic		Original	Nasopharengeal swab		AY.122	GK	G142D,P681R,R158del,F157del,T19R,D950N,E156G,T478K,D614G,L452R)	delta
hCoV-19/Belgium/IPG-518/2021	EPI_ISL_3508104	2021-08-09	Europe / Belgium / Wallonie	Human	ZIP: 7712		Male	56	Symptomatic		Original	Nasopharyngeal swab	surveillance	AY.43	GK	P681R,R158del,F157del,T19R,D950N,E156G,T478K,D614G,L452R)	delta
hCoV-19/Belgium/IPG-524/2021	EPI_ISL_3508110	2021-08-06	Europe / Belgium / Wallonie	Human	ZIP: 6220		Male	11	Symptomatic		Original	Nasopharyngeal swab	surveillance	AY.33	GK	T250I,P681R,R158del,F157del,T19R,Q613H,D950N,E156G,T299I,T29A,T478K,D614G,L452R	delta
hCoV-19/Belgium/IPG-527/2021	EPI_ISL_3508113	2021-08-06	Europe / Belgium / Wallonie	Human	ZIP: 5650		Female	49	Symptomatic		Original	Nasopharyngeal swab	surveillance	AY.5	GK	P681R,R158del,F157del,T19R,D950N,E156G,T478K,D614G,L452R)	delta
hCoV-19/Belgium/IPG-531/2021	EPI_ISL_3508117	2021-08-04	Europe / Belgium / Wallonie	Human	ZIP: 7500		Male	24	Symptomatic		Original	Nasopharyngeal swab	surveillance	AY.66	GK	P681R,T19R,D950N,T478K,D614G,L452R)	delta
hCoV-19/Italy/APU-IZSPB-2487PT/2021	EPI_ISL_3543548	2021-08-11	Europe / Italy / Apulia / Taranto / Taranto	Human			Male	43	Asymptomatic		Original	Nasopharyngeal Swab		AY.102	GK	T95I,P681R,R158del,F157del,Q677H,T19R,D950N,E156G,T478K,D614G,L452R)	delta
hCoV-19/Italy/APU-IZSPB-2499PT/2021	EPI_ISL_3543555	2021-08-11	Europe / Italy / Apulia / Taranto / Taranto	Human			Female	53	Paucisymptomatic		Original	Nasopharyngeal Swab		AY.42	GK	T95I,G485R,P681R,R158del,F157del,T19R,V70F,D950N,E156G,T478K,D614G,L452R)	delta
hCoV-19/Italy/APU-IZSPB-2381PT/2021	EPI_ISL_3543512	2021-08-09	Europe / Italy / Apulia / Lecce / Lecce	Human			Male	34	Asymptomatic		Original	Nasopharyngeal Swab		AY.43	GK	P681R,R158del,N501Y,F157del,T19R,D950N,E156G,T478K,D614G,L452R)	delta
hCoV-19/Italy/APU-IZSPB-2383PT/2021	EPI_ISL_3543513	2021-08-09	Europe / Italy / Apulia / Lecce / Lecce	Human			Male	53	Paucisymptomatic		Original	Nasopharyngeal Swab		AY.125	GK	T95I,P681R,R158del,F157del,T19R,D950N,E156G,T478K,D614G,L452R)	delta
hCoV-19/Italy/APU-IZSPB-2355PT/2021	EPI_ISL_3543500	2021-08-09	Europe / Italy / Apulia / Lecce / Lecce	Human			Male	25	Asymptomatic		Original	Nasopharyngeal Swab		AY.43	GK	T95I,P681R,R158del,F157del,T19R,D950N,E156G,T478K,D614G,L452R)	delta
hCoV-19/Italy/APU-IZSPB-2373PT/2021	EPI_ISL_3543507	2021-08-09	Europe / Italy / Apulia / Lecce / Lecce	Human			Female	75	Paucisymptomatic		Original	Nasopharyngeal Swab		AY.98.1	GK	P251L,P681R,R158del,F157del,T19R,D950N,E156G,T478K,D614G,L452R	delta
hCoV-19/Italy/APU-IZSPB-2337PT/2021	EPI_ISL_3543492	2021-08-09	Europe / Italy / Apulia / Lecce / Lecce	Human			Female	81	Paucisymptomatic		Original	Nasopharyngeal Swab		AY.120	GK	T95I,P681R,R158del,D950B,F157del,Q677H,T19R,E156G,T478K,D614G,L452R)	delta
hCoV-19/Italy/APU-IZSPB-2344PT/2021	EPI_ISL_3543497	2021-08-09	Europe / Italy / Apulia / Lecce / Lecce	Human			Male	92	Paucisymptomatic		Original	Nasopharyngeal Swab		AY.43	GK	P681R,R158del,F157del,T19R,D950N,E156G,T478K,D614G,L452R)	delta
hCoV-19/Italy/APU-IZSPB-2334PT/2021	EPI_ISL_3543489	2021-08-09	Europe / Italy / Apulia / Lecce / Lecce	Human			Male	23	Asymptomatic		Original	Nasopharyngeal Swab		AY.43	GK	P681R,R158del,F157del,T19R,D950N,E156G,T478K,D614G,L452R)	delta
hCoV-19/Italy/APU-IZSPB-2295PT/2021	EPI_ISL_3543471	2021-08-06	Europe / Italy / Apulia / Bari / Bari	Human			Male	19	Asymptomatic		Original	Nasopharyngeal Swab		AY.4	GK	T95I,P681R,R158del,F157del,T19R,D950N,E156G,T478K,D614G,L452R)	delta
hCoV-19/Italy/APU-IZSPB-2495PT/2021	EPI_ISL_3543552	2021-08-11	Europe / Italy / Apulia / Taranto / Taranto	Human			Female	63	Paucisymptomatic		Original	Nasopharyngeal Swab		AY.42	GK	T95I,P681R,R158del,F157del,T19R,V70F,D950N,E156G,T478K,D614G,L452R)	delta
hCoV-19/Italy/APU-IZSPB-2400PT/2021	EPI_ISL_3543516	2021-08-10	Europe / Italy / Apulia / Brindisi / Brindisi	Human			Female	63	Asymptomatic		Original	Nasopharyngeal Swab		AY.4	GK	P681R,R158del,F157del,T19R,D950N,E156G,T478K,D614G,L452R	delta
hCoV-19/Italy/APU-IZSPB-2377PT/2021	EPI_ISL_3543509	2021-08-09	Europe / Italy / Apulia / Lecce / Lecce	Human			Male	32	Asymptomatic		Original	Nasopharyngeal Swab		AY.116	GK	T95I,P681R,R158del,A684V,F157del,T19R,D950N,E156G,T478K,D614G,L452R)	delta
hCoV-19/Italy/APU-IZSPB-2364PT/2021	EPI_ISL_3543504	2021-08-09	Europe / Italy / Apulia / Lecce / Lecce	Human			Male	27	Asymptomatic		Original	Nasopharyngeal Swab		AY.61	GK	P681R,R158del,D950B,F157del,T19R,A222V,E156G,T478K,D614G,L452R	delta
hCoV-19/Italy/APU-IZSPB-2335PT/2021	EPI_ISL_3543490	2021-08-09	Europe / Italy / Apulia / Lecce / Lecce	Human			Male	29	Asymptomatic		Original	Nasopharyngeal Swab		AY.120	GK	T95I,P681R,R158del,F157del,T19R,V90F,D950N,E156G,T478K,D614G,L452R)	delta
hCoV-19/Italy/APU-IZSPB-2348PT/2021	EPI_ISL_3543498	2021-08-09	Europe / Italy / Apulia / Lecce / Lecce	Human			Female	75	Paucisymptomatic		Original	Nasopharyngeal Swab		AY.43	GK	P681R,R158del,F157del,T19R,D950N,E156G,T478K,D614G,L452R	delta
hCoV-19/Italy/APU-IZSPB-2340PT/2021	EPI_ISL_3543495	2021-08-09	Europe / Italy / Apulia / Lecce / Lecce	Human			Male	66	Asymptomatic		Original	Nasopharyngeal Swab		AY.116	GK	T95I,P681R,R158del,A684V,F157del,T19R,D950N,E156G,T478K,D614G,L452R)	delta
hCoV-19/Italy/APU-IZSPB-2333PT/2021	EPI_ISL_3543488	2021-08-09	Europe / Italy / Apulia / Lecce / Lecce	Human			Female	54	Paucisymptomatic		Original	Nasopharyngeal Swab		AY.4	GK	T95I,P681R,R158del,F157del,T19R,D950N,E156G,T478K,D614G,L452R	delta
hCoV-19/Italy/APU-IZSPB-2509PT/2021	EPI_ISL_3543558	2021-08-11	Europe / Italy / Apulia / Taranto / Taranto	Human			Male	19	Paucisymptomatic		Original	Nasopharyngeal Swab		AY.46.6	GK	P681R,R158del,F157del,T19R,D950N,E156G,T478K,D614G,L452R	delta
hCoV-19/Italy/APU-IZSPB-2336PT/2021	EPI_ISL_3543491	2021-08-09	Europe / Italy / Apulia / Lecce / Lecce	Human			Male	58	Asymptomatic		Original	Nasopharyngeal Swab		AY.98.1	GK	P251L,P681R,R158del,F157del,T19R,D950N,E156G,T478K,D614G,L452R	delta
hCoV-19/Malawi/CERI-KRISP-K021019/2021	EPI_ISL_3663673	2021-03-18	Africa / Malawi / Northern / Mzuzu	Human			Male	23	Asymptomatic		Original	Nasopharyngeal swab and oropharyngeal swab		AY.38	GK	P681R,D950N,D614G)	delta
hCoV-19/Malawi/CERI-KRISP-K020988/2021	EPI_ISL_3663670	2021-06-16	Africa / Malawi / Northern / Mzuzu	Human			Male	40	Asymptomatic		Original	Nasopharyngeal swab and oropharyngeal swab		AY.116	GK	P681R,T19R,T478K,D614G,L452R	delta
hCoV-19/Malawi/CERI-KRISP-K020910/2021	EPI_ISL_3663640	2021-06-22	Africa / Malawi / Southern / Southern / Blantyre	Human			Male	16	Asymptomatic		Original	Nasopharyngeal swab and oropharyngeal swab		B.1.617.2	GK	D950N,T478K,P681R,D614G,L452R,T19R	delta
hCoV-19/Malawi/CERI-KRISP-K020922/2021	EPI_ISL_3663649	2021-05-31	Africa / Malawi / Central / Central / Lilongwe	Human			Male	34	Asymptomatic		Original	Nasopharyngeal swab and oropharyngeal swab		AY.30	GK	T19R,D950N,T478K,D614G,Q414K,L452R)	delta
hCoV-19/Malawi/CERI-KRISP-K020921/2021	EPI_ISL_3663648	2021-06-01	Africa / Malawi / Central / Central / Lilongwe	Human			Female	32	Asymptomatic		Original	Nasopharyngeal swab and oropharyngeal swab		B.1.617.2	GK	D950N,H66R,D80A,D614G,Q414K,L452R,T19R	delta
hCoV-19/Malawi/CERI-KRISP-K020920/2021	EPI_ISL_3663647	2021-06-21	Africa / Malawi / Southern / Southern / Blantyre	Human			Male	21	Asymptomatic		Original	Nasopharyngeal swab and oropharyngeal swab		B.1.617.2	GK	T19R,D950N,T478K,D614G,Q414K,L452R)	delta
hCoV-19/Malawi/CERI-KRISP-K020919/2021	EPI_ISL_3663646	2021-06-21	Africa / Malawi / Southern / Southern / Blantyre	Human			Male	38	Asymptomatic		Original	Nasopharyngeal swab and oropharyngeal swab		AY.70	GK	D950N,T478K,P681R,D614G,L452R,T19R	delta
hCoV-19/Malawi/CERI-KRISP-K020917/2021	EPI_ISL_3663645	2021-06-21	Africa / Malawi / Southern / Southern / Blantyre	Human			Male	20	Asymptomatic		Original	Nasopharyngeal swab and oropharyngeal swab		B.1.617.2	GK	P681R,T19R,D950N,T478K,D614G,Q414K,L452R	delta
hCoV-19/Malawi/CERI-KRISP-K020883/2021	EPI_ISL_3663632	2021-05-28	Africa / Malawi / Southern / Southern / Blantyre	Human			Male	45	Asymptomatic		Original	Nasopharyngeal swab and oropharyngeal swab		AY.30	GK	P681R,T19R,D950N,T478K,D614G,Q414K,L452R	delta
hCoV-19/Malawi/CERI-KRISP-K020882/2021	EPI_ISL_3663631	2021-05-28	Africa / Malawi / Southern / Southern / Blantyre	Human			Male	59	Asymptomatic		Original	Nasopharyngeal swab and oropharyngeal swab		AY.30	GK	P681R,T19R,D950N,T478K,D614G,Q414K,L452R	delta
hCoV-19/Malawi/CERI-KRISP-K020881/2021	EPI_ISL_3663630	2021-05-28	Africa / Malawi / Southern / Southern / Blantyre	Human			Male	30	Asymptomatic		Original	Nasopharyngeal swab and oropharyngeal swab		B.1.617.2	GK	P681R,R158del,F157del,T19R,D950N,E156G,T478K,D614G,Q414K,L452R	delta
hCoV-19/Malawi/CERI-KRISP-K020909/2021	EPI_ISL_3663639	2021-06-22	Africa / Malawi / Southern / Southern / Blantyre	Human			Female	36	Asymptomatic		Original	Nasopharyngeal swab and oropharyngeal swab		B.1.617.2	GK	D950N,T478K,P681R,D614G,L452R,T19R	delta
hCoV-19/Malawi/CERI-KRISP-K020906/2021	EPI_ISL_3663637	2021-06-22	Africa / Malawi / Southern / Southern / Blantyre	Human			Male	47	Asymptomatic		Original	Nasopharyngeal swab and oropharyngeal swab		B.1.617.2	GK	D950N,T478K,P681R,D614G,L452R,T19R	delta
hCoV-19/Malawi/CERI-KRISP-K020895/2021	EPI_ISL_3663636	2021-04-28	Africa / Malawi / Southern / Southern / Blantyre	Human			Male	47	Asymptomatic		Original	Nasopharyngeal swab and oropharyngeal swab		B.1.617.2	GK	P681R,T19R,D950N,T478K,D614G,L452R)	delta
hCoV-19/Malawi/CERI-KRISP-K020886/2021	EPI_ISL_3663634	2021-05-16	Africa / Malawi / Southern / Southern / Blantyre	Human			Female	39	Asymptomatic		Original	Nasopharyngeal swab and oropharyngeal swab		AY.46	GK	P681R,D950N,T478K,D614G,L452R)	delta
hCoV-19/Malawi/CERI-KRISP-K020927/2021	EPI_ISL_3663652	2021-06-06	Africa / Malawi / Central / Central / Lilongwe	Human			Male	48	Asymptomatic		Original	Nasopharyngeal swab and oropharyngeal swab		AY.46	GK	R158G,T478K,P681R,E156del,D614G,L452R,F157del	delta
hCoV-19/Malawi/CERI-KRISP-K020926/2021	EPI_ISL_3663651	2021-06-06	Africa / Malawi / Central / Lilongwe	Human			Male	42	Asymptomatic		Original	Nasopharyngeal swab and oropharyngeal swab		AY.43	GK	D950N,T478K,P681R,D614G,L452R,T19R	delta
hCoV-19/Malawi/CERI-KRISP-K020925/2021	EPI_ISL_3663650	2021-06-10	Africa / Malawi / Central / Central / Lilongwe	Human			Male	29	Asymptomatic		Original	Nasopharyngeal swab and oropharyngeal swab		B.1.617.2	GK	P681R,T19R,D950N,T478K,D614G,L452R	delta
hCoV-19/Malawi/CERI-KRISP-K020948/2021	EPI_ISL_3663657	2021-06-10	Africa / Malawi / Central / Lilongwe	Human			Male	33	Asymptomatic		Original	Nasopharyngeal swab and oropharyngeal swab		AY.112	GK	T95I,P681R,T19R,D950N,T478K,D614G,L452R	delta
hCoV-19/Malawi/CERI-KRISP-K020947/2021	EPI_ISL_3663656	2021-06-10	Africa / Malawi / Central / Central / Lilongwe	Human			Male	27	Asymptomatic		Original	Nasopharyngeal swab and oropharyngeal swab		B.1.617.2	GK	P681R,T19R,D950N,T478K,D614G,L452R	delta
hCoV-19/Malawi/CERI-KRISP-K020865/2021	EPI_ISL_3663620	2021-06-18	Africa / Malawi / Southern / Southern / Blantyre	Human			unknown	47	Asymptomatic		Original	Nasopharyngeal swab and oropharyngeal swab		B.1.617.2	GK	P681R,T19R,D950N,T478K,D614G,L452R	delta
hCoV-19/Malawi/CERI-KRISP-K020879/2021	EPI_ISL_3663629	2021-06-04	Africa / Malawi / Southern / Southern / Blantyre	Human			Female	24	Asymptomatic		Original	Nasopharyngeal swab and oropharyngeal swab		AY.30	GK	P681R,T19R,D950N,T478K,D614G,Q414K,L452R	delta
hCoV-19/Malawi/CERI-KRISP-K020874/2021	EPI_ISL_3663626	2021-06-17	Africa / Malawi / Southern / Southern / Blantyre	Human			Male	51	Asymptomatic		Original	Nasopharyngeal swab and oropharyngeal swab		AY.30	GK	P681R,T19R,D950N,T478K,D614G,Q414K,L452R	delta
hCoV-19/Malawi/CERI-KRISP-K020870/2021	EPI_ISL_3663624	2021-06-11	Africa / Malawi / Southern / Southern / Blantyre	Human			Male	22	Asymptomatic		Original	Nasopharyngeal swab and oropharyngeal swab		AY.30	GK	P681R,T19R,D950N,T478K,D614G,Q414K,L452R	delta
hCoV-19/Malawi/CERI-KRISP-K020868/2021	EPI_ISL_3663622	2021-06-10	Africa / Malawi / Southern / Southern / Blantyre	Human			Male	36	Asymptomatic		Original	Nasopharyngeal swab and oropharyngeal swab		AY.70	GK	P681R,R158del,F157del,T19R,A222V,D950N,E156G,T478K,D614G,L452R)	delta
hCoV-19/Malawi/CERI-KRISP-K020862/2021	EPI_ISL_3663618	2021-06-18	Africa / Malawi / Southern / Southern / Blantyre	Human			Male	30	Asymptomatic		Original	Nasopharyngeal swab and oropharyngeal swab		AY.70	GK	D950N,D427H,T478K,P681R,L452R,T19R	delta
hCoV-19/Malawi/CERI-KRISP-K020861/2021	EPI_ISL_3663617	2021-06-18	Africa / Malawi / Southern / Southern / Blantyre	Human			Male	38	Asymptomatic		Original	Nasopharyngeal swab and oropharyngeal swab		AY.70	GK	P681R,T19R,D950N,D427H,T478K,A1026S,D614G,L452R,C1247F)	delta
hCoV-19/Malawi/CERI-KRISP-K020860/2021	EPI_ISL_3663616	2021-06-19	Africa / Malawi / Southern / Southern / Blantyre	Human			unknown	61	Asymptomatic		Original	Nasopharyngeal swab and oropharyngeal swab		AY.30	GK	P681R,T19R,D950N,T478K,D614G,Q414K,L452R	delta
hCoV-19/Malawi/CERI-KRISP-K020858/2021	EPI_ISL_3663615	2021-04-24	Africa / Malawi / Southern / Southern / Blantyre	Human			Male	57	Asymptomatic		Original	Nasopharyngeal swab and oropharyngeal swab		AY.46	GK	P681R,E156del,F157del,T19R,R158G,T478K,D614G,L452R	delta
hCoV-19/Italy/APU-IZSPB-2320PT/2021	EPI_ISL_3543477	2021-08-09	Europe / Italy / Apulia / Lecce / Lecce	Human			Female	90	Paucisymptomatic		Original	Nasopharyngeal Swab		AY.46.6	GK	P681R,R158del,F157del,T19R,D950N,E156G,T478K,D614G,L452R	delta
hCoV-19/Italy/APU-IZSPB-2502PT/2021	EPI_ISL_3543556	2021-08-11	Europe / Italy / Apulia / Taranto / Taranto	Human			Female	unknow	Paucisymptomatic		Original	Nasopharyngeal Swab		AY.42	GK	T95I,P681R,R158del,F157del,T19R,V70F,D950N,E156G,T478K,D614G,L452R)	delta
hCoV-19/Belgium/IPG-566/2021	EPI_ISL_3710566	2021-08-16	Europe / Belgium / Wallonie	Human	ZIP: 7500		Male	35	Symptomatic		Original	Nasopharyngeal swab	surveillance	AY.9.2	GK	P681R,R158del,F157del,T19R,A222V,D950N,E156G,T478K,D614G,L452R)	delta
hCoV-19/Belgium/IPG-574/2021	EPI_ISL_3710569	2021-08-15	Europe / Belgium / Wallonie	Human	ZIP: 6044		Male	37	Symptomatic		Original	Nasopharyngeal swab	surveillance	AY.33	GK	T250I,P681R,R158del,F157del,T19R,Q613H,D950N,E156G,T299I,T29A,T478K,D614G,L452R	delta
hCoV-19/Belgium/IPG-570/2021	EPI_ISL_3710581	2021-08-14	Europe / Belgium / Wallonie	Human	ZIP: 1020		Male	2	Symptomatic		Original	Nasopharyngeal swab	surveillance	AY.43	GK	P681R,T19R,D950N,T478K,D614G,L452R	delta
hCoV-19/Belgium/IPG-579/2021	EPI_ISL_3710584	2021-08-17	Europe / Belgium / Wallonie	Human	ZIP: 7500		Female	28	Symptomatic		Original	Nasopharyngeal swab	surveillance	AY.43	GK	P681R,T19R,D950N,T478K,T791I,D614G,L452R	delta
hCoV-19/Belgium/IPG-582/2021	EPI_ISL_3710586	2021-08-18	Europe / Belgium / Wallonie	Human	ZIP: 6040		Male	22	Symptomatic		Original	Nasopharyngeal swab	surveillance	AY.124	GK	P681R,T19R,D950N,T478K,D614G,L452R	delta
hCoV-19/Belgium/IPG-567/2021	EPI_ISL_3710571	2021-08-12	Europe / Belgium / Wallonie	Human	ZIP: 6280		Male	26	Symptomatic		Original	Nasopharyngeal swab	surveillance	AY.43	GK	P681R,R158del,F157del,T19R,D950N,E156G,T478K,D614G,L452R)	delta
hCoV-19/Belgium/IPG-573/2021	EPI_ISL_3710577	2021-08-16	Europe / Belgium / Wallonie	Human	ZIP: 6001		Female	16	Symptomatic		Original	Nasopharyngeal swab	surveillance	AY.33	GK	T250I,P681R,R158del,F157del,T19R,Q613H,D950N,E156G,T299I,T29A,T478K,D614G,L452R)	delta
hCoV-19/Belgium/IPG-580/2021	EPI_ISL_3710578	2021-08-16	Europe / Belgium / Wallonie	Human	ZIP: 7540		Female	7	Symptomatic		Original	Nasopharyngeal swab	surveillance	AY.43	GK	P681R,R158del,F157del,T19R,D950N,E156G,T478K,D614G,L452R	delta
hCoV-19/Belgium/IPG-563/2021	EPI_ISL_3710574	2021-08-13	Europe / Belgium / Wallonie	Human	ZIP: 6040		Male	33	Symptomatic		Original	Nasopharyngeal swab	surveillance	AY.66	GK	P681R,R158del,F157del,T19R,A222V,D950N,P1079T,E156G,T478K,D614G,L452R)	delta
hCoV-19/Belgium/IPG-575/2021	EPI_ISL_3710567	2021-08-19	Europe / Belgium / Wallonie	Human	ZIP: 6120		Male	67	Symptomatic		Original	Nasopharyngeal swab	surveillance	AY.43	GK	P681R,R158del,F157del,T19R,D950N,E156G,T478K,D614G,L452R	delta
hCoV-19/Belgium/IPG-572/2021	EPI_ISL_3710580	2021-08-13	Europe / Belgium / Wallonie	Human	ZIP: 6043		Female	25	Symptomatic		Original	Nasopharyngeal swab	surveillance	AY.92	GK	P681R,R158del,D178N,F157del,T19R,D950N,E156G,T478K,D614G,L452R	delta
hCoV-19/Belgium/IPG-561/2021	EPI_ISL_3710582	2021-08-13	Europe / Belgium / Wallonie	Human	ZIP: 5600		Female	59	Symptomatic		Original	Nasopharyngeal swab	surveillance	AY.70	GK	R21T,P681R,R158del,F157del,T19R,A222V,D950N,E156G,T478K,D614G,L452R)	delta
hCoV-19/Belgium/IPG-576/2021	EPI_ISL_3710583	2021-08-18	Europe / Belgium / Wallonie	Human	ZIP: 7700		Male	37	Symptomatic		Original	Nasopharyngeal swab	surveillance	AY.43	GK	P681R,T19R,D950N,T478K,D614G,L452R	delta
hCoV-19/Belgium/IPG-568/2021	EPI_ISL_3710585	2021-08-12	Europe / Belgium / Wallonie	Human	ZIP: 6250		Male	26	Symptomatic		Original	Nasopharyngeal swab	surveillance	AY.125	GK	P681R,R158del,F157del,T19R,D950N,E156G,T478K,D614G,L452R)	delta
hCoV-19/Belgium/IPG-581/2021	EPI_ISL_3710570	2021-08-14	Europe / Belgium / Wallonie	Human	ZIP: 6180		Female	17	Symptomatic		Original	Nasopharyngeal swab	surveillance	AY.122	GK	P681R,R158del,F157del,T19R,D950N,E156G,T478K,D614G,L452R)	delta
hCoV-19/Belgium/IPG-569/2021	EPI_ISL_3710572	2021-08-11	Europe / Belgium / Wallonie	Human	ZIP: 6010		Male	23	Symptomatic		Original	Nasopharyngeal swab	surveillance	AY.45	GK	P681R,R158del,F157del,T19R,D950N,E156G,T478K,D614G,L452R	delta
hCoV-19/Belgium/IPG-565/2021	EPI_ISL_3710579	2021-08-19	Europe / Belgium / Wallonie	Human	ZIP: 7700		Male	60	Symptomatic		Original	Nasopharyngeal swab	surveillance	AY.9.2	GK	P681R,T19R,D950N,T478K,D614G,L452R)	delta
hCoV-19/Italy/APU-IZSPB-2361PT/2021	EPI_ISL_3543501	2021-08-09	Europe / Italy / Apulia / Lecce / Lecce	Human			unknown	47	Paucisymptomatic		Original	Nasopharyngeal Swab		AY.43	GK	P681R,R158del,F157del,T19R,D950N,E156G,T478K,D614G,L452R)	delta
hCoV-19/Italy/APU-IZSPB-2362PT/2021	EPI_ISL_3543502	2021-08-09	Europe / Italy / Apulia / Lecce / Lecce	Human			Male	34	Paucisymptomatic		Original	Nasopharyngeal Swab		AY.102	GK	T95I,P681R,R158del,F157del,Q677H,T19R,D950N,E156G,T478K,D614G,L452R)	delta
hCoV-19/Italy/APU-IZSPB-2339PT/2021	EPI_ISL_3543494	2021-08-09	Europe / Italy / Apulia / Lecce / Lecce	Human			Male	19	Asymptomatic		Original	Nasopharyngeal Swab		AY.43	GK	P681R,R158del,D950B,F157del,T19R,E156G,T478K,D614G,L452R)	delta
hCoV-19/Estonia/17371334/2021	EPI_ISL_3665773	2021-06-12	Europe / Estonia / Northern Estonia	Human			Male	30	Symptomatic		Original	Nasopharyngeal swab		AY.122	GK	G142D,S680P,P681R,R158del,F157del,T19R,D950N,E156G,T478K,D614G,L452R)	delta
hCoV-19/Belgium/IPG-577/2021	EPI_ISL_3710568	2021-08-18	Europe / Belgium / Wallonie	Human	ZIP: 6061		Female	51	Symptomatic		Original	Nasopharyngeal swab	surveillance	AY.45	GK	P681R,R158del,F157del,T19R,D950N,E156G,T478K,D614G,L452R	delta
hCoV-19/Belgium/IPG-562/2021	EPI_ISL_3710576	2021-08-12	Europe / Belgium / Wallonie	Human	ZIP: 6250		Female	62	Symptomatic		Original	Nasopharyngeal swab	surveillance	AY.66	GK	P681R,R158del,F157del,T19R,A222V,D950N,E156G,T478K,D614G,L452R)	delta
hCoV-19/Belgium/IPG-560/2021	EPI_ISL_3710575	2021-08-12	Europe / Belgium / Wallonie	Human	ZIP: 6250		Male	65	Symptomatic		Original	Nasopharyngeal swab	surveillance	AY.66	GK	P681R,R158del,F157del,T19R,A222V,D950N,E156G,T478K,D614G,L452R)	delta
hCoV-19/Belgium/IPG-571/2021	EPI_ISL_3710573	2021-08-14	Europe / Belgium / Wallonie	Human	ZIP: 6010		Female	11	Symptomatic		Original	Nasopharyngeal swab	surveillance	AY.43	GK	P681R,R158del,F157del,T19R,D950N,E156G,T478K,T791I,D614G,L452R)	delta
hCoV-19/Italy/APU-IZSPB-2367PT/2021	EPI_ISL_3543505	2021-08-09	Europe / Italy / Apulia / Lecce / Lecce	Human			Female	27	Paucisymptomatic		Original	Nasopharyngeal Swab		AY.125	GK	T95I,P681R,R158del,D950B,F157del,T19R,E156G,T478K,D614G,L452R	delta
hCoV-19/Italy/APU-IZSPB-2363PT/2021	EPI_ISL_3543503	2021-08-09	Europe / Italy / Apulia / Lecce / Lecce	Human			Male	15	Paucisymptomatic		Original	Nasopharyngeal Swab		AY.43	GK	P681R,R158del,D950B,F157del,T19R,E156G,T478K,D614G,L452R	delta
hCoV-19/Malawi/CERI-KRISP-K020911/2021	EPI_ISL_3663641	2021-06-22	Africa / Malawi / Southern / Southern / Blantyre	Human			Male	11	Asymptomatic		Original	Nasopharyngeal swab and oropharyngeal swab		B.1.617.2	GK	D950N,T478K,D614G,L452R,T19R	delta
hCoV-19/Malawi/CERI-KRISP-K020914/2021	EPI_ISL_3663643	2021-06-21	Africa / Malawi / Southern / Southern / Blantyre	Human			Female	49	Asymptomatic		Original	Nasopharyngeal swab and oropharyngeal swab		B.1.617.2	GK	P681R,R158del,F157del,T19R,D950N,E156G,T478K,D614G,Q414K,L452R	delta
hCoV-19/Malawi/CERI-KRISP-K020949/2021	EPI_ISL_3663658	2021-06-01	Africa / Malawi / Central / Central / Lilongwe	Human			Female	2	Asymptomatic		Original	Nasopharyngeal swab and oropharyngeal swab		B.1.617.2	GK	P681R,T19R,D950N,T478K,D614G,L452R	delta
hCoV-19/Malawi/CERI-KRISP-K020968/2021	EPI_ISL_3663663	2021-03-18	Africa / Malawi / Northern / Mzuzu	Human			Male	39	Asymptomatic		Original	Nasopharyngeal swab and oropharyngeal swab		B.1.617.2	GK	T478K,P681R,D614G,L452R,T19R	delta
hCoV-19/Malawi/CERI-KRISP-K020932/2021	EPI_ISL_3663654	2021-06-22	Africa / Malawi / Central / Lilongwe	Human			Female	53	Symptomatic		Original	Nasopharyngeal swab and oropharyngeal swab		AY.70	GK	P681R,R158del,F157del,T19R,A222V,D950N,D427H,E156G,T478K,D614G,L452R)	delta
hCoV-19/Italy/APU-IZSPB-2301PT/2021	EPI_ISL_3543472	2021-08-06	Europe / Italy / Apulia / Bari / Bari	Human			Male	80	Paucisymptomatic		Original	Nasopharyngeal Swab		AY.98.1	GK	P251L,P681R,R158del,F157del,T19R,D950N,E156G,T478K,D614G,L452R	delta
hCoV-19/Italy/APU-IZSPB-2321PT/2021	EPI_ISL_3543478	2021-08-09	Europe / Italy / Apulia / Lecce / Lecce	Human			Male	49	Paucisymptomatic		Original	Nasopharyngeal Swab		AY.34.1	GK	T95I,P681R,R158del,F157del,Q677H,T19R,D950N,E156G,T478K,L1265F,D614G,L452R)	delta
hCoV-19/Italy/APU-IZSPB-2322PT/2021	EPI_ISL_3543479	2021-08-09	Europe / Italy / Apulia / Lecce / Lecce	Human			Female	35	Asymptomatic		Original	Nasopharyngeal Swab		AY.7.2	GK	P681R,R158del,F157del,T19R,D950N,E156G,T478K,D614G,L452R)	delta
hCoV-19/Italy/APU-IZSPB-2338PT/2021	EPI_ISL_3543493	2021-08-09	Europe / Italy / Apulia / Lecce / Lecce	Human			Female	25	Asymptomatic		Original	Nasopharyngeal Swab		AY.43	GK	P681R,R158del,F157del,T19R,D950N,E156G,T478K,T791I,D614G,L452R)	delta
hCoV-19/Italy/APU-IZSPB-2341PT/2021	EPI_ISL_3543496	2021-08-09	Europe / Italy / Apulia / Lecce / Lecce	Human			Female	46	Paucisymptomatic		Original	Nasopharyngeal Swab		AY.43	GK	P681R,R158del,F157del,T19R,D950N,E156G,T478K,D614G,L452R	delta
hCoV-19/Italy/APU-IZSPB-2402PT/2021	EPI_ISL_3543517	2021-08-10	Europe / Italy / Apulia / Brindisi / Brindisi	Human			Male	12	Asymptomatic		Original	Nasopharyngeal Swab		AY.5	GK	P681R,R158del,D950B,F157del,T19R,E156G,T478K,D614G,L452R	delta
hCoV-19/Italy/APU-IZSPB-2403PT/2021	EPI_ISL_3543518	2021-08-10	Europe / Italy / Apulia / Brindisi / Brindisi	Human			Male	38	Asymptomatic		Original	Nasopharyngeal Swab		AY.5	GK	P681R,R158del,F157del,T19R,D950N,E156G,T478K,D614G,L452R	delta
hCoV-19/Italy/APU-IZSPB-2410PT/2021	EPI_ISL_3543520	2021-08-10	Europe / Italy / Apulia / Brindisi / Brindisi	Human			Male	15	Asymptomatic		Original	Nasopharyngeal Swab		AY.4	GK	T95I,P681R,R158del,F157del,T19R,D950N,E156G,T478K,D614G,L452R	delta
hCoV-19/Italy/APU-IZSPB-2496PT/2021	EPI_ISL_3543553	2021-08-11	Europe / Italy / Apulia / Taranto / Taranto	Human			Female	82	Asymptomatic		Original	Nasopharyngeal Swab		AY.58	GK	P681R,R158del,D950B,F157del,T19R,A222V,E156G,T478K,D614G,L452R,A344S)	delta
hCoV-19/Italy/APU-IZSPB-2497PT/2021	EPI_ISL_3543554	2021-08-11	Europe / Italy / Apulia / Taranto / Taranto	Human			Male	87	Paucisymptomatic		Original	Nasopharyngeal Swab		AY.34	GK	T95I,P681R,R158del,D950B,F157del,Q677H,T19R,E156G,T478K,D614G,L452R)	delta
hCoV-19/Italy/APU-IZSPB-2369PT/2021	EPI_ISL_3543506	2021-08-09	Europe / Italy / Apulia / Lecce / Lecce	Human			Female	43	Asymptomatic		Original	Nasopharyngeal Swab		AY.43	GK	P681R,R158del,D950B,F157del,T19R,E156G,T478K,D614G,L452R	delta
hCoV-19/Italy/APU-IZSPB-2374PT/2021	EPI_ISL_3543508	2021-08-09	Europe / Italy / Apulia / Lecce / Lecce	Human			Male	76	Paucisymptomatic		Original	Nasopharyngeal Swab		AY.98.1	GK	P251L,P681R,R158del,F157del,T19R,D950N,E156G,T478K,D614G,L452R	delta
hCoV-19/Italy/APU-IZSPB-2378PT/2021	EPI_ISL_3543510	2021-08-09	Europe / Italy / Apulia / Lecce / Lecce	Human			Female	25	Paucisymptomatic		Original	Nasopharyngeal Swab		AY.43	GK	P681R,R158del,F157del,T19R,D950N,E156G,T478K,D614G,L452R	delta
hCoV-19/Italy/APU-IZSPB-2397PT/2021	EPI_ISL_3543514	2021-08-10	Europe / Italy / Apulia / Brindisi / Brindisi	Human			Female	49	Paucisymptomatic		Original	Nasopharyngeal Swab		AY.43	GK	P681R,R158del,F157del,T19R,D950N,E156G,T478K,D614G,L452R)	delta
hCoV-19/Italy/APU-IZSPB-2399PT/2021	EPI_ISL_3543515	2021-08-10	Europe / Italy / Apulia / Brindisi / Brindisi	Human			Male	64	Asymptomatic		Original	Nasopharyngeal Swab		AY.4	GK	T95I,P681R,R158del,F157del,T19R,D950N,E156G,T478K,D614G,L452R	delta
hCoV-19/Italy/APU-IZSPB-2412PT/2021	EPI_ISL_3543521	2021-08-10	Europe / Italy / Apulia / Brindisi / Brindisi	Human			Female	24	Paucisymptomatic		Original	Nasopharyngeal Swab		AY.98.1	GK	P251L,P681R,R158del,F157del,T19R,D950N,E156G,T478K,D614G,L452R	delta
hCoV-19/Italy/APU-IZSPB-2493PT/2021	EPI_ISL_3543551	2021-08-11	Europe / Italy / Apulia / Taranto / Taranto	Human			Female	31	Asymptomatic		Original	Nasopharyngeal Swab		AY.120	GK	T95I,P681R,R158del,D950B,F157del,Q677H,T19R,E156G,T478K,L8F,D614G,L452R)	delta
hCoV-19/Mexico/SIN_CIAD-MZT_S7505/2021	EPI_ISL_4005952	2021-07-16	North America / Mexico / Sinaloa / Mazatlan	Human		Non-sentinel-surveillance (hospital)	Female	58	Symptomatic - Ambulatory	Complete Sinovac	Original	Oropharyngeal swab		AY.26	GK	N1074S,G142D,P681R,R158del,F157del,T19R,A222V,D950N,E156G,T478K,D614G,C1253F,L452R)	delta
hCoV-19/Belgium/IPG-597/2021	EPI_ISL_3827061	2021-08-24	Europe / Belgium / Wallonie	Human	ZIP: 1410		Male	83	Symptomatic		Original	Nasopharyngeal swab	surveillance	AY.43	GK	P681R,R158del,F157del,T19R,D950N,E156G,T478K,D614G,L452R	delta
hCoV-19/Belgium/IPG-598/2021	EPI_ISL_3827062	2021-08-24	Europe / Belgium / Wallonie	Human	ZIP: 6044		Male	48	Symptomatic		Original	Nasopharyngeal swab	surveillance	AY.92	GK	P681R,P1162S,R158del,D178N,F157del,T19R,D950N,E156G,T478K,D614G,L452R	delta
hCoV-19/Belgium/IPG-593/2021	EPI_ISL_3827057	2021-08-20	Europe / Belgium / Wallonie	Human	ZIP: 1440		Female	47	Symptomatic		Original	Nasopharyngeal swab	surveillance	B.1.617.2	GK	P681R,R158del,F157del,T19R,A222V,D950N,E156G,T478K,D614G,L452R)	delta
hCoV-19/Belgium/IPG-589/2021	EPI_ISL_3827053	2021-08-19	Europe / Belgium / Wallonie	Human	ZIP: 6061		Male	87	Symptomatic		Original	Nasopharyngeal swab	surveillance	AY.4	GK	P681R,R158del,F157del,T19R,D950N,E156G,T478K,D614G,L452R)	delta
hCoV-19/Belgium/IPG-590/2021	EPI_ISL_3827054	2021-08-24	Europe / Belgium / Wallonie	Human	ZIP: 6110		Female	60	Symptomatic		Original	Nasopharyngeal swab	surveillance	AY.9.2	GK	P681R,R158del,F157del,T19R,A222V,D950N,E156G,T478K,D614G,L452R)	delta
hCoV-19/Belgium/IPG-596/2021	EPI_ISL_3827060	2021-08-24	Europe / Belgium / Wallonie	Human	ZIP: 6044		Female	51	Symptomatic		Original	Nasopharyngeal swab	surveillance	AY.43	GK	P681R,R158del,F157del,T19R,D950N,E156G,T478K,D614G,L452R	delta
hCoV-19/Belgium/IPG-591/2021	EPI_ISL_3827055	2021-08-18	Europe / Belgium / Wallonie	Human	ZIP: 6142		Male	60	Symptomatic		Original	Nasopharyngeal swab	surveillance	AY.70	GK	R21T,P681R,R158del,F157del,T19R,A222V,D950N,E156G,T478K,D614G,L452R)	delta
hCoV-19/Belgium/IPG-592/2021	EPI_ISL_3827056	2021-08-20	Europe / Belgium / Wallonie	Human	ZIP: 6534		Female	60	Symptomatic		Original	Nasopharyngeal swab	surveillance	AY.92	GK	P681R,R158del,D178N,F157del,T19R,D950N,E156G,T478K,D614G,L452R	delta
hCoV-19/Belgium/IPG-595/2021	EPI_ISL_3827059	2021-08-20	Europe / Belgium / Wallonie	Human	ZIP: 5640		Female	50	Symptomatic		Original	Nasopharyngeal swab	surveillance	AY.125	GK	P681R,R158del,F157del,T19R,D950N,E156G,T478K,D614G,L452R)	delta
hCoV-19/Belgium/IPG-586/2021	EPI_ISL_3827050	2021-08-24	Europe / Belgium / Wallonie	Human	ZIP: 5630		Female	62	Symptomatic		Original	Nasopharyngeal swab	surveillance	AY.5	GK	P681R,R158del,F157del,T19R,D950N,E156G,L216F,T478K,D614G,L452R	delta
hCoV-19/Belgium/IPG-584/2021	EPI_ISL_3827048	2021-08-20	Europe / Belgium / Wallonie	Human	ZIP: 7700		Male	46	Symptomatic		Original	Nasopharyngeal swab	surveillance	AY.122	GK	P681R,R158del,F157del,T19R,D950N,E156G,T478K,D614G,L452R)	delta
hCoV-19/Italy/APU-IZSPB-2568PT/2021	EPI_ISL_3846605	2021-08-16	Europe / Italy / Apulia / Lecce / Lecce	Human			Female	45	Paucisymptomatic		Original	Nasopharyngeal Swab		AY.46.6	GK	P681R,R158del,D950B,F157del,T19R,E156G,T478K,D614G,L452R	delta
hCoV-19/Italy/APU-IZSPB-2878PT/2021	EPI_ISL_3846600	2021-08-25	Europe / Italy / Apulia / Lecce / Lecce	Human			Female	59	Asymptomatic		Original	Nasopharyngeal Swab		AY.6	GK	P681R,R158del,D950B,F157del,Q14H,T19R,Q613H,E156G,T478K,D614G,L452R	delta
hCoV-19/Italy/APU-IZSPB-2625PT/2021	EPI_ISL_3846616	2021-08-16	Europe / Italy / Apulia / Lecce / Lecce	Human			Female	54	Asymptomatic		Original	Nasopharyngeal Swab		AY.120	GK	T95I,P681R,R158del,D950B,F157del,T19R,E156G,T478K,D614G,L452R	delta
hCoV-19/Italy/APU-IZSPB-2627PT/2021	EPI_ISL_3846618	2021-08-17	Europe / Italy / Apulia / Brindisi / Brindisi	Human			Male	44	Paucisymptomatic		Original	Nasopharyngeal Swab		AY.4	GK	T95I,P681R,R158del,D950B,F157del,T19R,E156G,T478K,D614G,L452R)	delta
hCoV-19/Italy/APU-IZSPB-2674PT/2021	EPI_ISL_3846625	2021-08-17	Europe / Italy / Apulia / Brindisi / Brindisi	Human			Female	26	Asymptomatic		Original	Nasopharyngeal Swab		AY.43	GK	P681R,R158del,F157del,T19R,D950N,E156G,T478K,D614G,L452R)	delta
hCoV-19/Italy/APU-IZSPB-2644PT/2021	EPI_ISL_3846622	2021-08-17	Europe / Italy / Apulia / Brindisi / Brindisi	Human			Female	70	Asymptomatic		Original	Nasopharyngeal Swab		AY.42	GK	T95I,P681R,R158del,D950B,F157del,T19R,T719I,E156G,T478K,D614G,L452R)	delta
hCoV-19/Italy/APU-IZSPB-2789PT/2021	EPI_ISL_3846640	2021-08-18	Europe / Italy / Apulia / Milano / Milano	Human			Male	10	Paucisymptomatic		Original	Nasopharyngeal Swab		AY.71	GK	P681R,R158del,D950B,F157del,S1252F,T19R,A222V,E156G,T478K,D614G,L452R	delta
hCoV-19/Italy/APU-IZSPB-2849PT/2021	EPI_ISL_3846646	2021-08-25	Europe / Italy / Apulia / Bari / Bari	Human			Male	12	Paucisymptomatic		Original	Nasopharyngeal Swab		AY.98.1	GK	P251L,P681R,R158del,D950B,F157del,T19R,E156G,T478K,D614G,L452R	delta
hCoV-19/Italy/APU-IZSPB-2851PT/2021	EPI_ISL_3846650	2021-08-25	Europe / Italy / Apulia / Bari / Bari	Human			Male	25	Paucisymptomatic		Original	Nasopharyngeal Swab		AY.43	GK	P681R,R158del,D950B,F157del,T19R,E156G,T478K,D614G,L452R	delta
hCoV-19/Italy/APU-IZSPB-2859PT/2021	EPI_ISL_3846655	2021-08-25	Europe / Italy / Apulia / Brindisi / Brindisi	Human			Female	56	Asymptomatic		Original	Nasopharyngeal Swab		AY.43	GK	P681R,R158del,F157del,T19R,D950N,E156G,T478K,D614G,L452R)	delta
hCoV-19/Italy/APU-IZSPB-2866PT/2021	EPI_ISL_3846663	2021-08-25	Europe / Italy / Apulia / Lecce / Lecce	Human			Female	35	Asymptomatic		Original	Nasopharyngeal Swab		AY.33	GK	T250I,P681R,R158del,F157del,T19R,Q613H,D950N,E156G,T299I,T29A,T478K,D614G,L452R)	delta
hCoV-19/Italy/APU-IZSPB-2868PT/2021	EPI_ISL_3846667	2021-08-25	Europe / Italy / Apulia / Lecce / Lecce	Human			Female	36	Asymptomatic		Original	Nasopharyngeal Swab		AY.4	GK	T95I,P681R,R158del,D950B,F157del,T19R,E156G,T478K,D614G,L452R	delta
hCoV-19/Italy/APU-IZSPB-2903PT/2021	EPI_ISL_3846679	2021-08-25	Europe / Italy / Apulia / Lecce / Lecce	Human			Male	41	Asymptomatic		Original	Nasopharyngeal Swab		B.1.617.2	GK	P681R,R158del,F157del,T19R,D950N,E156G,T478K,D614G,L452R	delta
hCoV-19/Italy/APU-IZSPB-2608PT/2021	EPI_ISL_3846598	2021-08-16	Europe / Italy / Apulia / Lecce / Lecce	Human			Female	49	Asymptomatic		Original	Nasopharyngeal Swab		AY.39	GK	T95I,G142D,P681R,R158del,F157del,Q677H,T19R,D950N,E156G,D614G	delta
hCoV-19/Italy/APU-IZSPB-2902PT/2021	EPI_ISL_3846595	2021-08-25	Europe / Italy / Apulia / Lecce / Lecce	Human			Female	76	Paucisymptomatic		Original	Nasopharyngeal Swab		AY.43	GK	P681R,R158del,D950B,F157del,T19R,E156G,T478K,D614G,L452R	delta
hCoV-19/Italy/APU-IZSPB-2928PT/2021	EPI_ISL_3846694	2021-08-26	Europe / Italy / Apulia / Taranto / Taranto	Human			Male	21	Asymptomatic		Original	Nasopharyngeal Swab		AY.7.2	GK	P681R,R158del,F157del,T19R,D950N,E156G,T478K,D614G,L452R)	delta
hCoV-19/Italy/APU-IZSPB-2860PT/2021	EPI_ISL_3846601	2021-08-25	Europe / Italy / Apulia / Brindisi / Brindisi	Human			unknown	16	Asymptomatic		Original	Nasopharyngeal Swab		AY.122	GK	S494L,P681R,R158del,F157del,T19R,D950N,E156G,T478K,D614G,L452R	delta
hCoV-19/Italy/APU-IZSPB-2589PT/2021	EPI_ISL_3846609	2021-08-16	Europe / Italy / Apulia / Lecce / Lecce	Human			Female	52	Paucisymptomatic		Original	Nasopharyngeal Swab		AY.43	GK	P681R,R158del,D950B,F157del,T19R,E156G,T478K,T791I,D614G,L452R)	delta
hCoV-19/Italy/APU-IZSPB-2585PT/2021	EPI_ISL_3846607	2021-08-16	Europe / Italy / Apulia / Lecce / Lecce	Human			Male	14	Asymptomatic		Original	Nasopharyngeal Swab		AY.98.1	GK	P251L,P681R,R158del,D950B,F157del,T19R,E156G,T478K,D614G,L452R	delta
hCoV-19/Italy/APU-IZSPB-2591PT/2021	EPI_ISL_3846612	2021-08-16	Europe / Italy / Apulia / Lecce / Lecce	Human			Female	70	Asymptomatic		Original	Nasopharyngeal Swab		AY.43	GK	P681R,R158del,D950B,F157del,T19R,E156G,T478K,D614G,L452R)	delta
hCoV-19/Italy/APU-IZSPB-2635PT/2021	EPI_ISL_3846620	2021-08-17	Europe / Italy / Apulia / Brindisi / Brindisi	Human			Female	5	Paucisymptomatic		Original	Nasopharyngeal Swab		AY.43	GK	P681R,R158del,D950B,F157del,T19R,E156G,T478K,D614G,L452R	delta
hCoV-19/Italy/APU-IZSPB-2659PT/2021	EPI_ISL_3846623	2021-08-17	Europe / Italy / Apulia / Brindisi / Brindisi	Human			Male	17	Paucisymptomatic		Original	Nasopharyngeal Swab		AY.92	GK	T95I,P681R,R158del,D950B,D178N,F157del,D80Y,T19R,E156G,T478K,D614G,L452R)	delta
hCoV-19/Italy/APU-IZSPB-2777PT/2021	EPI_ISL_3846639	2021-08-18	Europe / Italy / Apulia / Taranto / Taranto	Human			Male	17	Asymptomatic		Original	Nasopharyngeal Swab		AY.120	GK	T95I,P681R,R158del,D950B,F157del,Q677H,T19R,E156G,T478K,D614G,L452R)	delta
hCoV-19/Italy/APU-IZSPB-2769PT/2021	EPI_ISL_3846637	2021-08-18	Europe / Italy / Apulia / Taranto / Taranto	Human			Female	60	Paucisymptomatic		Original	Nasopharyngeal Swab		AY.46.6	GK	P681R,R158del,D950B,A222S,F157del,T19R,E156G,T478K,D614G,L452R)	delta
hCoV-19/Italy/APU-IZSPB-2850PT/2021	EPI_ISL_3846648	2021-08-25	Europe / Italy / Apulia / Bari / Bari	Human			Female	23	Paucisymptomatic		Original	Nasopharyngeal Swab		AY.43	GK	G142D,P681R,R158del,A262S,F157del,T19R,D950N,E156G,T478K,D614G,L452R)	delta
hCoV-19/Italy/APU-IZSPB-2852PT/2021	EPI_ISL_3846652	2021-08-25	Europe / Italy / Apulia / Bari / Bari	Human			Female	87	Paucisymptomatic		Original	Nasopharyngeal Swab		AY.46.6	GK	P681R,R158del,D950B,A222S,F157del,T19R,E156G,T478K,D614G,L452R)	delta
hCoV-19/Italy/APU-IZSPB-2861PT/2021	EPI_ISL_3846657	2021-08-25	Europe / Italy / Apulia / Brindisi / Brindisi	Human			Female	59	Asymptomatic		Original	Nasopharyngeal Swab		AY.43	GK	P681R,R158del,F157del,T19R,D950N,E156G,T478K,D614G,L452R)	delta
hCoV-19/Italy/APU-IZSPB-2853PT/2021	EPI_ISL_3846654	2021-08-25	Europe / Italy / Apulia / Bari / Bari	Human			Male	58	Paucisymptomatic		Original	Nasopharyngeal Swab		AY.120	GK	T95I,P681R,R158del,D950B,F157del,Q677H,T19R,E156G,T478K,D614G,L452R)	delta
hCoV-19/Italy/APU-IZSPB-2871PT/2021	EPI_ISL_3846669	2021-08-25	Europe / Italy / Apulia / Lecce / Lecce	Human			Male	77	Asymptomatic		Original	Nasopharyngeal Swab		AY.7.2	GK	P681R,R158del,D950B,F157del,T19R,E156G,T478K,D614G,L452R	delta
hCoV-19/Italy/APU-IZSPB-2876PT/2021	EPI_ISL_3846673	2021-08-25	Europe / Italy / Apulia / Lecce / Lecce	Human			Female	31	Paucisymptomatic		Original	Nasopharyngeal Swab		AY.43	GK	P681R,R158del,D950B,F157del,T19R,E156G,T478K,D614G,L452R	delta
hCoV-19/Italy/APU-IZSPB-2897PT/2021	EPI_ISL_3846677	2021-08-25	Europe / Italy / Apulia / Lecce / Lecce	Human			Female	31	Paucisymptomatic		Original	Nasopharyngeal Swab		AY.43	GK	P681R,R158del,D950B,F157del,T19R,E156G,T478K,D614G,L452R	delta
hCoV-19/Italy/APU-IZSPB-2916PT/2021	EPI_ISL_3846683	2021-08-25	Europe / Italy / Apulia / Lecce / Lecce	Human			Male	54	Asymptomatic		Original	Nasopharyngeal Swab		AY.120	GK	T95I,P681R,R158del,D950B,F157del,T19R,E156G,T478K,D614G,L452R	delta
hCoV-19/Italy/APU-IZSPB-2912PT/2021	EPI_ISL_3846681	2021-08-25	Europe / Italy / Apulia / Lecce / Lecce	Human			Female	17	Asymptomatic		Original	Nasopharyngeal Swab		AY.120	GK	T95I,P681R,R158del,F157del,T19R,D950N,E156G,T478K,D614G,S514F,L452R)	delta
hCoV-19/Italy/APU-IZSPB-2927PT/2021	EPI_ISL_3846692	2021-08-26	Europe / Italy / Apulia / Taranto / Taranto	Human			Male	7	Asymptomatic		Original	Nasopharyngeal Swab		AY.120	GK	T95I,H1101Y,P681R,R158del,D950B,F157del,T19R,E156G,T478K,D614G,L452R)	delta
hCoV-19/Italy/APU-IZSPB-2926PT/2021	EPI_ISL_3846691	2021-08-26	Europe / Italy / Apulia / Taranto / Taranto	Human			Male	27	Asymptomatic		Original	Nasopharyngeal Swab		AY.43	GK	P681R,R158del,D950B,F157del,T19R,E156G,T478K,D614G,L452R	delta
hCoV-19/Italy/FVG-TS-64029677/2021	EPI_ISL_3875434	2021-07-31	Europe / Italy / Friuli Venezia Giulia	Human		Random in diagnostic samples	Male	53	Asymptomatic	Pfizer 1st 2021/06/28, 2nd 2021/07/30	Original	Oropharyngeal swab		AY.112	GK	T95I,G142D,P681R,R158del,F157del,T19R,D950N,E156G,T478K,D614G,L452R	delta
hCoV-19/Italy/FVG-PN-64029767/2021	EPI_ISL_3875423	2021-07-29	Europe / Italy / Friuli Venezia Giulia	Human		Random in diagnostic samples	Male	24	Asymptomatic	No	Original	Oropharyngeal swab		AY.43	GK	G142D,A701V,P681R,R158del,F157del,T19R,D950N,E156G,T478K,D614G,L452R)	delta
hCoV-19/Belgium/IPG-614/2021	EPI_ISL_3907961	2021-08-26	Europe / Belgium / Wallonie	Human	ZIP: 6200		Male	52	Symptomatic		Original	Nasopharyngeal swab	surveillance	AY.43	GK	P681R,R158del,F157del,T19R,D950N,E156G,T478K,D614G,L452R)	delta
hCoV-19/Belgium/IPG-615/2021	EPI_ISL_3907962	2021-08-26	Europe / Belgium / Wallonie	Human	ZIP: 6043		Female	24	Symptomatic		Original	Nasopharyngeal swab	surveillance	AY.43	GK	P681R,R158del,F157del,T19R,D950N,E156G,T478K,D614G,L452R	delta
hCoV-19/Belgium/IPG-617/2021	EPI_ISL_3907964	2021-08-24	Europe / Belgium / Wallonie	Human	ZIP: 5660		Female	28	Symptomatic		Original	Nasopharyngeal swab	surveillance	AY.98.1	GK	P251L,P681R,R158del,F157del,T19R,D950N,E156G,T478K,D614G,L452R	delta
hCoV-19/Belgium/IPG-613/2021	EPI_ISL_3907960	2021-08-26	Europe / Belgium / Wallonie	Human	ZIP: 5651		Male	38	Symptomatic		Original	Nasopharyngeal swab	surveillance	AY.98.1	GK	R567K,P251L,P681R,R158del,F157del,T19R,D950N,E156G,T478K,D614G,L452R	delta
hCoV-19/Belgium/IPG-604/2021	EPI_ISL_3907951	2021-08-19	Europe / Belgium / Wallonie	Human	ZIP: 7521		Male	53	Symptomatic		Original	Nasopharyngeal swab	surveillance	AY.9.2	GK	P681R,R158del,F157del,T19R,A222V,D950N,E156G,T478K,D614G,L452R)	delta
hCoV-19/Belgium/IPG-605/2021	EPI_ISL_3907952	2021-08-19	Europe / Belgium / Wallonie	Human	ZIP: 7500		Female	50	Symptomatic		Original	Nasopharyngeal swab	surveillance	AY.9.2	GK	P681R,R158del,F157del,T19R,A222V,D950N,E156G,T478K,D614G,L452R)	delta
hCoV-19/Belgium/IPG-608/2021	EPI_ISL_3907955	2021-08-18	Europe / Belgium / Wallonie	Human	ZIP: 7640		Male	64	Symptomatic		Original	Nasopharyngeal swab	surveillance	AY.43	GK	P681R,R158del,F157del,T19R,D950N,E156G,T478K,T791I,D614G,L452R)	delta
hCoV-19/Belgium/IPG-609/2021	EPI_ISL_3907956	2021-08-18	Europe / Belgium / Wallonie	Human	ZIP: 7640		Female	21	Symptomatic		Original	Nasopharyngeal swab	surveillance	AY.43	GK	P681R,R158del,F157del,T19R,D950N,E156G,T478K,T791I,D614G,L452R)	delta
hCoV-19/Belgium/IPG-602/2021	EPI_ISL_3907949	2021-08-18	Europe / Belgium / Wallonie	Human	ZIP: 7640		Female	55	Symptomatic		Original	Nasopharyngeal swab	surveillance	AY.43	GK	P681R,T19R,D950N,T478K,T791I,D614G,L452R	delta
hCoV-19/Belgium/IPG-600/2021	EPI_ISL_3907947	2021-08-27	Europe / Belgium / Wallonie	Human	ZIP: 6120		Male	80	Symptomatic		Original	Nasopharyngeal swab	surveillance	AY.43	GK	P681R,T19R,W258L,D950N,T478K,D614G,L452R	delta
hCoV-19/Belgium/IPG-612/2021	EPI_ISL_3907959	2021-08-18	Europe / Belgium / Wallonie	Human	ZIP: 5651		Female	71	Symptomatic		Original	Nasopharyngeal swab	surveillance	AY.43	GK	P681R,R158del,D1168Y,F157del,T19R,D950N,E156G,T478K,D614G,L452R)	delta
hCoV-19/Belgium/IPG-607/2021	EPI_ISL_3907954	2021-08-16	Europe / Belgium / Wallonie	Human	ZIP: 7540		Female	7	Symptomatic		Original	Nasopharyngeal swab	surveillance	AY.43	GK	P681R,R158del,F157del,T19R,D950N,E156G,T478K,D614G,L452R	delta
hCoV-19/Belgium/IPG-606/2021	EPI_ISL_3907953	2021-08-14	Europe / Belgium / Wallonie	Human	ZIP: 7540		Male	45	Symptomatic		Original	Nasopharyngeal swab	surveillance	AY.43	GK	P681R,R158del,F157del,T19R,D950N,E156G,T478K,D614G,L452R	delta
hCoV-19/Belgium/IPG-611/2021	EPI_ISL_3907958	2021-08-23	Europe / Belgium / Wallonie	Human	ZIP: 7506		Female	41	Symptomatic		Original	Nasopharyngeal swab	surveillance	AY.43	GK	P681R,R158del,F157del,T19R,D950N,E156G,T478K,D614G,L452R	delta
hCoV-19/Belgium/IPG-610/2021	EPI_ISL_3907957	2021-08-20	Europe / Belgium / Wallonie	Human	ZIP: 7500		Female	31	Symptomatic		Original	Nasopharyngeal swab	surveillance	AY.43	GK	P681R,R158del,F157del,T19R,D950N,E156G,T478K,T791I,D614G,L452R	delta
hCoV-19/Belgium/IPG-619/2021	EPI_ISL_3909456	2021-08-25	Europe / Belgium / Wallonie	Human	ZIP: 6230		Female	32	Symptomatic		Original	Nasopharyngeal swab	surveillance	AY.98.1	GK	P251L,P681R,R158del,F157del,T19R,D950N,E156G,T478K,D614G,L452R	delta
hCoV-19/Belgium/IPG-618/2021	EPI_ISL_3909455	2021-08-25	Europe / Belgium / Wallonie	Human	ZIP: 1495		Male	72	Symptomatic		Original	Nasopharyngeal swab	surveillance	AY.66	GK	P681R,R158del,F157del,T19R,A222V,D950N,E156G,T478K,D614G,L452R,T22I)	delta
hCoV-19/Belgium/IPG-620/2021	EPI_ISL_3909457	2021-08-24	Europe / Belgium / Wallonie	Human	ZIP: 1000		Female	10	Symptomatic		Original	Nasopharyngeal swab	surveillance	AY.98.1	GK	P251L,P681R,R158del,F157del,T19R,D950N,E156G,T478K,D614G,L452R	delta
hCoV-19/Belgium/IPG-622/2021	EPI_ISL_3909459	2021-08-24	Europe / Belgium / Wallonie	Human	ZIP: 1410		Male	9	Symptomatic		Original	Nasopharyngeal swab	surveillance	AY.98.1	GK	P251L,P681R,R158del,F157del,T19R,D950N,E156G,T478K,D614G,L452R	delta
hCoV-19/Gabon/LPDG1155/2021	EPI_ISL_4005252	2021-08-02	Africa / Gabon / Central Africa	Human			Female	43	Asymptomatic		Original	Nasopharyngeal and oropharyngeal swab		B.1.617.2	GK	T95I,G142D,P681R,R158del,F157del,T19R,D950N,E156G	delta
hCoV-19/Gabon/LPDG1156/2021	EPI_ISL_4005253	2021-08-02	Africa / Gabon / Central Africa	Human			Male	38	Asymptomatic		Original	Nasopharyngeal and oropharyngeal swab		B.1.617.2	GK	T95I,G142D,L5F,P681R,R158del,F157del,T19R,D950N,E156G	delta
hCoV-19/Mexico/SIN_CIAD-MZT_HJ2549/2021	EPI_ISL_4005925	2021-07-13	North America / Mexico / Sinaloa / Mazatlan	Human		Non-sentinel-surveillance (hospital)	Female	84	Asymptomatic - Ambulatory	Complete Sinovac	Original	Oropharyngeal swab		AY.26	GK	N1074S,G142D,P681R,R158del,F157del,T19R,A222V,D950N,E156G,T478K,D614G,L452R)	delta
hCoV-19/Mexico/SIN_CIAD-MZT_HJ2947/2021	EPI_ISL_4005935	2021-07-22	North America / Mexico / Sinaloa / Mazatlan	Human		Non-sentinel-surveillance (hospital)	Male	59	Symptomatic - Ambulatory	Complete Sinovac	Original	Oropharyngeal swab		AY.26	GK	N1074S,G142D,P681R,R158del,F157del,T19R,A222V,E156G,T478K,D614G,L452R)	delta
hCoV-19/Mexico/SIN_CIAD-MZT_HJ3213/2021	EPI_ISL_4005938	2021-07-27	North America / Mexico / Sinaloa / Mazatlan	Human		Non-sentinel-surveillance (hospital)	Female	45	Asymptomatic - Ambulatory	Complete Sinovac	Original	Oropharyngeal swab		AY.26	GK	N1074S,G142D,P681R,R158del,F157del,T19R,A222V,E156G,T478K,D614G,L452R)	delta
hCoV-19/Mexico/SIN_CIAD-MZT_HJ3225/2021	EPI_ISL_4005939	2021-07-27	North America / Mexico / Sinaloa / Mazatlan	Human		Non-sentinel-surveillance (hospital)	Female	42	Asymptomatic - Ambulatory	Complete Sinovac	Original	Oropharyngeal swab		AY.26	GK	N1074S,G142D,P681R,R158del,F157del,T19R,A222V,D950N,E156G,T478K,D614G,L452R)	delta
hCoV-19/Mexico/SIN_CIAD-MZT_S7412/2021	EPI_ISL_4005947	2021-07-13	North America / Mexico / Sinaloa / Mazatlan	Human		Non-sentinel-surveillance (hospital)	Male	47	Symptomatic - Hospitalized		Original	Oropharyngeal swab		AY.26	GK	V1264L,N1074S,G142D,P681R,E154del,S155del,T19R,A222V,T478K,K795R,R158L,M153del,D614G,ins157I,L452R	delta
hCoV-19/Mexico/SIN_CIAD-MZT_S7437/2021	EPI_ISL_4005949	2021-07-13	North America / Mexico / Sinaloa / Mazatlan	Human		Non-sentinel-surveillance (hospital)	Male	48	Symptomatic - Ambulatory	Partial AstraZeneca	Original	Oropharyngeal swab		AY.26	GK	N1074S,G142D,P681R,R158del,F157del,T19R,A222V,D950N,E156G,T478K,D614G,L452R)	delta
hCoV-19/Mexico/SIN_CIAD-MZT_ID3044/2021	EPI_ISL_4005942	2021-07-20	North America / Mexico / Sinaloa / Mazatlan	Human		Non-sentinel-surveillance (hospital)	Female	50	Asymptomatic - Ambulatory	Complete Pfizer	Original	Oropharyngeal swab		AY.26	GK	N1074S,G142D,P681R,R158del,F157del,T19R,A222V,E156G,T478K,D614G,L452R)	delta
hCoV-19/Mexico/SIN_CIAD-MZT_S7392/2021	EPI_ISL_4005944	2021-07-12	North America / Mexico / Sinaloa / Mazatlan	Human		Non-sentinel-surveillance (hospital)	Male	55	Asymptomatic - Ambulatory	Complete Sinovac	Original	Oropharyngeal swab		AY.26	GK	V1264L,T95I,N1074S,G142D,P681R,R158del,F157del,T19R,E156G,T478K,D614G,L452R)	delta
hCoV-19/Mexico/SIN_CIAD-MZT_S7555/2021	EPI_ISL_4005956	2021-07-20	North America / Mexico / Sinaloa / Mazatlan	Human		Non-sentinel-surveillance (hospital)	Female	unknown	Symptomatic - Ambulatory	Not vaccinated	Original	Oropharyngeal swab		AY.26	GK	N1074S,G142D,P681R,R158del,F157del,T19R,A222V,E156G,T478K,D614G,L452R)	delta
hCoV-19/Mexico/SIN_CIAD-MZT_S7534/2021	EPI_ISL_4005955	2021-07-19	North America / Mexico / Sinaloa / Mazatlan	Human		Non-sentinel-surveillance (hospital)	Female	54	Symptomatic - Ambulatory	Complete Sinovac	Original	Oropharyngeal swab		AY.26	GK	N1074S,G142D,P681R,R158del,F157del,T19R,A222V,E156G,T478K,D614G,C1253F,L452R)	delta
hCoV-19/Mexico/SIN_CIAD-MZT_S7501/2021	EPI_ISL_4005951	2021-07-16	North America / Mexico / Sinaloa / Mazatlan	Human		Non-sentinel-surveillance (hospital)	Male	9	Symptomatic - Ambulatory	Not vaccinated	Original	Oropharyngeal swab		AY.26	GK	N1074S,G142D,P681R,R158del,F157del,T19R,A222V,E156G,T478K,D614G,L452R)	delta
hCoV-19/Gabon/LPDG1143/2021	EPI_ISL_4005073	2021-07-21	Africa / Gabon / Central Africa	Human			Female	16	Asymptomatic		Original	Nasopharyngeal and oropharyngeal swab		AY.39	GK	T95I,G142D,P681R,R158del,F157del,T19R,D950N,E156G,G181V,T1076I	delta
hCoV-19/Mexico/SIN_CIAD-MZT_HJ2520/2021	EPI_ISL_4005924	2021-07-13	North America / Mexico / Sinaloa / Mazatlan	Human		Non-sentinel-surveillance (hospital)	Female	66	Asymptomatic - Ambulatory	Complete AstraZeneca	Original	Oropharyngeal swab		AY.26	GK	N1074S,G142D,Q52R,P681R,R158del,F157del,T19R,A222V,E156G,T478K,D614G,L452R)	delta
hCoV-19/Mexico/SIN_CIAD-MZT_HJ2661/2021	EPI_ISL_4005927	2021-07-15	North America / Mexico / Sinaloa / Mazatlan	Human		Non-sentinel-surveillance (hospital)	Female	58	Symptomatic - Ambulatory	Complete Sinovac	Original	Oropharyngeal swab		AY.26	GK	N1074S,G142D,P681R,R158del,F157del,T19R,A222V,E156G,T478K,D614G,L452R	delta
hCoV-19/Mexico/SIN_CIAD-MZT_HJ2693/2021	EPI_ISL_4005929	2021-07-16	North America / Mexico / Sinaloa / Mazatlan	Human		Non-sentinel-surveillance (hospital)	Female	27	Symptomatic - Ambulatory	Complete CanSino	Original	Oropharyngeal swab		AY.26	GK	N1074S,G142D,P681R,R158del,F157del,T19R,A222V,E156G,T478K,D614G,L452R)	delta
hCoV-19/Mexico/SIN_CIAD-MZT_HJ2728/2021	EPI_ISL_4005931	2021-07-16	North America / Mexico / Sinaloa / Mazatlan	Human		Non-sentinel-surveillance (hospital)	Male	27	Asymptomatic - Ambulatory	Complete CanSino	Original	Oropharyngeal swab		AY.53	GK	G142D,A27S,P681R,R158del,F157del,T19R,D950N,E156G,T478K,D614G,L452R	delta
hCoV-19/Mexico/SIN_CIAD-MZT_HJ2795/2021	EPI_ISL_4005934	2021-07-19	North America / Mexico / Sinaloa / Mazatlan	Human		Non-sentinel-surveillance (hospital)	Female	18	Symptomatic - Ambulatory	Not vaccinated	Original	Oropharyngeal swab		AY.26	GK	N1074S,G142D,P681R,R158del,F157del,T19R,A222V,D950N,E156G,T478K,D614G,L452R,C1253F)	delta
hCoV-19/Mexico/SIN_CIAD-MZT_HJ2787/2021	EPI_ISL_4005933	2021-07-19	North America / Mexico / Sinaloa / Mazatlan	Human		Non-sentinel-surveillance (hospital)	Male	52	Asymptomatic - Ambulatory	Complete Sinovac	Original	Oropharyngeal swab		AY.20	GK	T95I,G142D,P681R,R158del,F157del,T19R,E156G,T478K,K97E,D614G,V1104L,L452R)	delta
hCoV-19/Mexico/SIN_CIAD-MZT_S7407/2021	EPI_ISL_4005946	2021-07-12	North America / Mexico / Sinaloa / Mazatlan	Human		Non-sentinel-surveillance (hospital)	Male	54	Symptomatic - Hospitalized		Original	Oropharyngeal swab		AY.26	GK	N1074S,G142D,P681R,R158del,F157del,T19R,A222V,E156G,T478K,D614G,C1253F,L452R)	delta
hCoV-19/Mexico/SIN_CIAD-MZT_S7422/2021	EPI_ISL_4005948	2021-07-13	North America / Mexico / Sinaloa / Mazatlan	Human		Non-sentinel-surveillance (hospital)	Female	50	Symptomatic - Ambulatory	Complete Sinovac	Original	Oropharyngeal swab		AY.26	GK	G142D,P681R,R158del,F157del,T19R,A222V,E156G,T478K,D614G,L452R	delta
hCoV-19/Mexico/SIN_CIAD-MZT_ID3025/2021	EPI_ISL_4005941	2021-07-19	North America / Mexico / Sinaloa / Mazatlan	Human		Non-sentinel-surveillance (hospital)	Female	66	Symptomatic - Ambulatory	Partial Pfizer	Original	Oropharyngeal swab		AY.20	GK	T95I,G142D,P681R,R158del,F157del,T19R,D950N,E156G,T478K,D614G,V1104L,L452R)	delta
hCoV-19/Mexico/SIN_CIAD-MZT_S7761/2021	EPI_ISL_4005958	2021-07-29	North America / Mexico / Sinaloa / Mazatlan	Human		Non-sentinel-surveillance (hospital)	Female	65	Symptomatic - Ambulatory	Complete ASTRAZENECA	Original	Oropharyngeal swab		AY.26	GK	N1074S,G142D,P681R,R158del,F157del,T19R,A222V,D950N,E156G,T478K,D614G,L452R,C1253F	delta
hCoV-19/Mexico/SIN_CIAD-MZT_S7772/2021	EPI_ISL_4005959	2021-07-29	North America / Mexico / Sinaloa / Mazatlan	Human		Non-sentinel-surveillance (hospital)	Male	70	Symptomatic - Hospitalized		Original	Oropharyngeal swab		AY.26	GK	N1074S,G142D,P681R,R158del,F157del,T19R,A222V,D950N,E156G,T478K,D614G,L452R	delta
hCoV-19/Mexico/SIN_CIAD-MZT_S7533/2021	EPI_ISL_4005954	2021-07-19	North America / Mexico / Sinaloa / Mazatlan	Human		Non-sentinel-surveillance (hospital)	Female	15	Symptomatic - Ambulatory	Not vaccinated	Original	Oropharyngeal swab		AY.26	GK	N1074S,G142D,P681R,R158del,F157del,T19R,A222V,E156G,T478K,D614G,L452R,C1247F)	delta
hCoV-19/Mexico/SIN_CIAD-MZT_S7485/2021	EPI_ISL_4005950	2021-07-15	North America / Mexico / Sinaloa / Mazatlan	Human		Non-sentinel-surveillance (hospital)	Male	54	Symptomatic - Hospitalized		Original	Oropharyngeal swab		AY.26	GK	N1074S,G142D,P681R,R158del,F157del,T19R,A222V,E156G,T478K,D614G,L452R)	delta
hCoV-19/Gabon/LPDG1150/2021	EPI_ISL_4005141	2021-07-28	Africa / Gabon / Central Africa	Human			Male	36	Asymptomatic		Original	Nasopharyngeal and oropharyngeal swab		AY.122	GK	G142D,W258R,P681R,R158del,F157del,T19R,D950N,E156G	delta
hCoV-19/Gabon/LPDG1151/2021	EPI_ISL_4005142	2021-08-01	Africa / Gabon / Central Africa	Human			Female	33	Asymptomatic		Original	Nasopharyngeal and oropharyngeal swab		AY.122	GK	V1264L,G142D,P681R,R158del,F157del,T19R,D950N,E156G	delta
hCoV-19/Mexico/SIN_CIAD-MZT_ID2978/2021	EPI_ISL_4005940	2021-07-14	North America / Mexico / Sinaloa / Mazatlan	Human		Non-sentinel-surveillance (hospital)	Male	58	Symptomatic - Ambulatory	Partial Sinovac	Original	Oropharyngeal swab		AY.26	GK	N1074S,G142D,P681R,R158del,F157del,T19R,A222V,E156G,T478K,D614G,L452R)	delta
hCoV-19/Mexico/SIN_CIAD-MZT_S7843/2021	EPI_ISL_4032211	2021-08-03	North America / Mexico / Sinaloa / Mazatlan	Human		Non-sentinel-surveillance (hospital)	Female	34	Symptomatic - Ambulatory	Complete SINOVAC	Original	Oropharyngeal swab		AY.20	GK	T240L,Y145T,T167L,V171del,L244stop,F168del,S155V,P174L,L241Y,A163L,N165M,N149T,H146S,N185I,Q239K,G181E,D950N,V143F,V159I,F186S,Q173S,E154K,T478K,S151V,K195R,F194L,V1104L,C166S,Y170del,E191D,D178T,P681R,K182N,Y160I,Y144I,S172del,S161A,G184V,M153W,E180K,M177W,N188I,S162L,Q183R,V193C,A243L,ins157ILV,F192L,D614G,L452R,R190G,S477I,W152G,N148T)	delta
hCoV-19/Belgium/IPG-647/2021	EPI_ISL_4053053	2021-08-31	Europe / Belgium / Wallonie	Human	ZIP: 7540		Female	71	Symptomatic		Original	Nasopharyngeal swab	surveillance	AY.36	GK	P681R,R158del,F157del,T19R,D950N,E156G,T478K,D614G,V1104L,L452R	delta
hCoV-19/Canada/NL-NML-89520/2021	EPI_ISL_4061034	2021-05-20	North America / Canada / Newfoundland and Labrador	Human		Cluster/Outbreak investigation	Male	25	Symptomatic		Original	Nasopharyngeal swab		AY.10	GK	G142D,P681R,R158del,F157del,T19R,A222V,D950N,E156G,T478K,D614G,L452R)	delta
hCoV-19/Canada/NL-NML-89519/2021	EPI_ISL_4061033	2021-05-20	North America / Canada / Newfoundland and Labrador	Human		Cluster/Outbreak investigation	Female	32	Symptomatic		Original	Nasopharyngeal swab		AY.10	GK	G142D,P681R,R158del,F157del,T19R,A222V,D950N,E156G,T478K,D614G,L452R)	delta
hCoV-19/Canada/NL-NML-89523/2021	EPI_ISL_4061037	2021-05-21	North America / Canada / Newfoundland and Labrador	Human		Cluster/Outbreak investigation	Female	53	Asymptomatic		Original	Nasopharyngeal swab		AY.10	GK	G142D,P681R,R158del,F157del,T19R,A222V,D950N,E156G,T478K,D614G,L452R)	delta
hCoV-19/Canada/NL-NML-89522/2021	EPI_ISL_4061036	2021-05-21	North America / Canada / Newfoundland and Labrador	Human		Cluster/Outbreak investigation	Male	21	Symptomatic		Original	Nasopharyngeal swab		AY.10	GK	G142D,P681R,R158del,F157del,T19R,A222V,D950N,E156G,T478K,D614G,L452R)	delta
hCoV-19/Canada/NL-NML-89521/2021	EPI_ISL_4061035	2021-05-21	North America / Canada / Newfoundland and Labrador	Human		Cluster/Outbreak investigation	Male	61	Symptomatic		Original	Nasopharyngeal swab		AY.10	GK	G142D,P681R,R158del,F157del,T19R,A222V,D950N,E156G,T478K,D614G,L452R)	delta
hCoV-19/Canada/NL-NML-89516/2021	EPI_ISL_4061030	2021-05-19	North America / Canada / Newfoundland and Labrador	Human		Cluster/Outbreak investigation	Male	40	Symptomatic		Original	Nasopharyngeal swab		AY.10	GK	G142D,P681R,R158del,F157del,T19R,A222V,D950N,E156G,T478K,D614G,L452R)	delta
hCoV-19/Canada/NL-NML-89517/2021	EPI_ISL_4061031	2021-05-20	North America / Canada / Newfoundland and Labrador	Human		Cluster/Outbreak investigation	Male	56	Asymptomatic		Original	Nasopharyngeal swab		AY.10	GK	G142D,P681R,R158del,F157del,T19R,A222V,D950N,E156G,T478K,D614G,L452R)	delta
hCoV-19/Canada/NL-NML-89518/2021	EPI_ISL_4061032	2021-05-20	North America / Canada / Newfoundland and Labrador	Human		Cluster/Outbreak investigation	Female	55	Symptomatic		Original	Nasopharyngeal swab		AY.10	GK	G142D,P681R,R158del,F157del,T19R,A222V,D950N,E156G,T478K,D614G,L452R)	delta
hCoV-19/Canada/NL-NML-89528/2021	EPI_ISL_4061042	2021-05-21	North America / Canada / Newfoundland and Labrador	Human		Cluster/Outbreak investigation	Female	32	Asymptomatic		Original	Nasopharyngeal swab		AY.10	GK	G142D,P681R,R158del,F157del,T19R,A222V,D950N,E156G,T478K,D614G,L452R	delta
hCoV-19/Canada/NL-NML-89515/2021	EPI_ISL_4061029	2021-05-14	North America / Canada / Newfoundland and Labrador	Human		Domestic travel surveillance	Male	32	Asymptomatic		Original	Nasopharyngeal swab		AY.10	GK	G142D,P681R,R158del,F157del,T19R,A222V,D950N,E156G,T478K,D614G,L452R)	delta
hCoV-19/Canada/NL-NML-89526/2021	EPI_ISL_4061040	2021-05-21	North America / Canada / Newfoundland and Labrador	Human		Cluster/Outbreak investigation	Female	64	Asymptomatic		Original	Nasopharyngeal swab		AY.10	GK	G142D,P681R,R158del,F157del,T19R,A222V,D950N,E156G,T478K,D614G,L452R)	delta
hCoV-19/Canada/NL-NML-89524/2021	EPI_ISL_4061038	2021-05-21	North America / Canada / Newfoundland and Labrador	Human		Cluster/Outbreak investigation	Female	86	Asymptomatic		Original	Nasopharyngeal swab		AY.10	GK	G142D,P681R,R158del,F157del,T19R,A222V,D950N,E156G,T478K,D614G,L452R)	delta
hCoV-19/Canada/NL-NML-89525/2021	EPI_ISL_4061039	2021-05-21	North America / Canada / Newfoundland and Labrador	Human		Cluster/Outbreak investigation	Male	65	Symptomatic		Original	Nasopharyngeal swab		AY.10	GK	G142D,P681R,R158del,F157del,T19R,A222V,D950N,E156G,T478K,D614G,L452R)	delta
hCoV-19/Canada/NL-NML-146150/2021	EPI_ISL_4061056	2021-08-05	North America / Canada / Newfoundland and Labrador	Human		International travel surveillance	Male	82	Symptomatic		Original	Nasopharyngeal swab		AY.4	GK	T95I,G142D,P681R,R158del,F157del,T19R,E156G,T478K,D614G,L452R)	delta
hCoV-19/Belgium/IPG-585/2021	EPI_ISL_3827049	2021-08-20	Europe / Belgium / Wallonie	Human	ZIP: 6040		Male	35	Symptomatic		Original	Nasopharyngeal swab	surveillance	AY.122	GK	P681R,R158del,F157del,T19R,D950N,E156G,T478K,G181V,D614G,L452R)	delta
hCoV-19/Belgium/IPG-587/2021	EPI_ISL_3827051	2021-08-24	Europe / Belgium / Wallonie	Human	ZIP: 6031		Female	47	Symptomatic		Original	Nasopharyngeal swab	surveillance	AY.122	GK	P681R,R158del,F157del,T19R,D950N,E156G,T478K,D614G,L452R)	delta
hCoV-19/Belgium/IPG-588/2021	EPI_ISL_3827052	2021-08-19	Europe / Belgium / Wallonie	Human	ZIP: 1341		Female	23	Symptomatic		Original	Nasopharyngeal swab	surveillance	AY.43	GK	P681R,R158del,P174S,F157del,Q677H,T19R,D950N,E156G,T478K,D614G,L452R)	delta
hCoV-19/Italy/APU-IZSPB-2867PT/2021	EPI_ISL_3846665	2021-08-25	Europe / Italy / Apulia / Lecce / Lecce	Human			Male	83	Paucisymptomatic		Original	Nasopharyngeal Swab		AY.9.2	GK	P681R,R158del,F157del,T19R,A222V,D950N,E156G,T478K,D614G,L452R	delta
hCoV-19/Italy/APU-IZSPB-2873PT/2021	EPI_ISL_3846671	2021-08-25	Europe / Italy / Apulia / Lecce / Lecce	Human			Female	70	Paucisymptomatic		Original	Nasopharyngeal Swab		AY.43	GK	P681R,R158del,D950B,F157del,T19R,E156G,T1117I,T478K,D614G,L452R)	delta
hCoV-19/Italy/APU-IZSPB-2884PT/2021	EPI_ISL_3846675	2021-08-25	Europe / Italy / Apulia / Lecce / Lecce	Human			Male	73	Asymptomatic		Original	Nasopharyngeal Swab		AY.43	GK	P681R,R158del,D950B,F157del,T19R,E156G,T1117I,T478K,D614G,L452R)	delta
hCoV-19/Italy/FVG-TS-37132066/2021	EPI_ISL_3923431	2021-08-13	Europe / Italy / Friuli Venezia Giulia	Human		Random in diagnostic samples	Male	34	Asymptomatic		Original	Oropharyngeal swab		AY.43	GK	G142D,P681R,R158del,F157del,T19R,D950N,E156G,T478K,D614G,L452R)	delta
hCoV-19/Italy/FVG-GO-64030163/2021	EPI_ISL_3923420	2021-08-12	Europe / Italy / Friuli Venezia Giulia	Human		Random in diagnostic samples	Male	12	Asymptomatic		Original	Oropharyngeal swab		AY.43	GK	G142D,P681R,R158del,F157del,T19R,D950N,E156G,T478K,D614G,L452R)	delta
hCoV-19/USA/IL-19196739/2021	EPI_ISL_3943742	2021-07-14	North America / USA / Illinois / Chicago	Human	Other: Community	Community survillence	Female	unknown	Asymptomatic		Original	Saliva		AY.26	GK	G142D,P681R,R158del,F157del,T19R,A222V,D950N,E156G,T478K,D614G,L452R)	delta
hCoV-19/USA/IL-19191535/2021	EPI_ISL_3943741	2021-07-14	North America / USA / Illinois / Chicago	Human	Other: Community	Community survillence	Female	11	Asymptomatic		Original	Saliva		AY.26	GK	G142D,P681R,R158del,F157del,T19R,A222V,D950N,E156G,T478K,D614G,L452R)	delta
hCoV-19/Mexico/SIN_CIAD-MZT_HJ2598/2021	EPI_ISL_4005926	2021-07-14	North America / Mexico / Sinaloa / Mazatlan	Human		Non-sentinel-surveillance (hospital)	Female	74	Asymptomatic - Ambulatory	Complete AstraZeneca	Original	Oropharyngeal swab		AY.26	GK	N1074S,G142D,P681R,R158del,F157del,T19R,A222V,E156G,T478K,D614G,L452R)	delta
hCoV-19/Mexico/SIN_CIAD-MZT_S7383/2021	EPI_ISL_4005943	2021-07-12	North America / Mexico / Sinaloa / Mazatlan	Human		Non-sentinel-surveillance (hospital)	Female	5	Symptomatic - Hospitalized		Original	Oropharyngeal swab		AY.20	GK	T95I,P681R,R158del,F157del,T19R,D950N,E156G,T478K,D614G,V1104L,L452R)	delta
hCoV-19/Canada/NL-NML-89482/2021	EPI_ISL_4061016	2021-05-03	North America / Canada / Newfoundland and Labrador	Human		International travel surveillance	Male	35	Asymptomatic		Original	Nasopharyngeal swab		B.1.617.2	GK	G142D,P681R,R158del,F157del,T19R,D950N,E156G,T478K,D614G,L452R	delta
hCoV-19/Canada/NL-NML-89527/2021	EPI_ISL_4061041	2021-05-21	North America / Canada / Newfoundland and Labrador	Human		Cluster/Outbreak investigation	Male	53	Asymptomatic		Original	Nasopharyngeal swab		AY.10	GK	G142D,P681R,R158del,F157del,T19R,A222V,D950N,E156G,T478K,D614G,L452R)	delta
hCoV-19/Belgium/IPG-603/2021	EPI_ISL_3907950	2021-08-19	Europe / Belgium / Wallonie	Human	ZIP: 7622		Female	15	Symptomatic		Original	Nasopharyngeal swab	surveillance	AY.4	GK	P681R,R158del,F157del,T19R,D950N,E156G,T478K,D614G,L452R)	delta
hCoV-19/Belgium/IPG-594/2021	EPI_ISL_3827058	2021-08-20	Europe / Belgium / Wallonie	Human	ZIP: 6001		Male	31	Symptomatic		Original	Nasopharyngeal swab	surveillance	AY.43	GK	P681R,R158del,F157del,T19R,D950N,E156G,T478K,D614G,L452R	delta
hCoV-19/Belgium/IPG-583/2021	EPI_ISL_3827047	2021-08-23	Europe / Belgium / Wallonie	Human	ZIP: 6120		Female	66	Symptomatic		Original	Nasopharyngeal swab	surveillance	AY.43	GK	P681R,T19R,W258L,D950N,T478K,D614G,L452R	delta
hCoV-19/Mexico/SIN_CIAD-MZT_HJ2999/2021	EPI_ISL_4005936	2021-07-22	North America / Mexico / Sinaloa / Mazatlan	Human		Non-sentinel-surveillance (hospital)	Female	38	Asymptomatic - Ambulatory	Complete CanSino	Original	Oropharyngeal swab		AY.26	GK	N1074S,G142D,P681R,R158del,F157del,T19R,A222V,E156G,T478K,D614G,L452R	delta
hCoV-19/Mexico/SIN_CIAD-MZT_HJ3186/2021	EPI_ISL_4005937	2021-07-27	North America / Mexico / Sinaloa / Mazatlan	Human		Non-sentinel-surveillance (hospital)	Female	31	Symptomatic - Ambulatory	Partial AstraZeneca	Original	Oropharyngeal swab		AY.26	GK	N1074S,G142D,P681R,R158del,F157del,T19R,A222V,E156G,T478K,D614G,L452R)	delta
hCoV-19/Belgium/IPG-616/2021	EPI_ISL_3907963	2021-08-26	Europe / Belgium / Wallonie	Human	ZIP: 6043		Male	54	Symptomatic		Original	Nasopharyngeal swab	surveillance	AY.43	GK	P681R,R158del,F157del,T19R,D950N,E156G,T478K,D614G,L452R	delta
hCoV-19/Mexico/SIN_CIAD-MZT_HJ2726/2021	EPI_ISL_4005930	2021-07-15	North America / Mexico / Sinaloa / Mazatlan	Human		Non-sentinel-surveillance (hospital)	Male	42	Symptomatic - Ambulatory	Partial AstraZeneca	Original	Oropharyngeal swab		AY.26	GK	N1074S,G142D,P681R,R158del,F157del,T19R,A222V,E156G,T478K,D614G,C1253F,L452R)	delta
hCoV-19/Mexico/SIN_CIAD-MZT_HJ2769/2021	EPI_ISL_4005932	2021-07-19	North America / Mexico / Sinaloa / Mazatlan	Human		Non-sentinel-surveillance (hospital)	Male	38	Asymptomatic - Ambulatory	Partial AstraZeneca	Original	Oropharyngeal swab		AY.100	GK	T95I,G142D,P681R,R158del,F157del,T19R,D950N,E156G,T478K,D614G,L452R)	delta
hCoV-19/Italy/APU-IZSPB-2929PT/2021	EPI_ISL_3846696	2021-08-26	Europe / Italy / Apulia / Taranto / Taranto	Human			Male	12	Asymptomatic		Original	Nasopharyngeal Swab		AY.46.6	GK	P681R,R158del,F157del,T19R,D950N,E156G,T478R,D614G,L452R)	delta
hCoV-19/Canada/NL-NML-146151/2021	EPI_ISL_4061057	2021-08-05	North America / Canada / Newfoundland and Labrador	Human		International travel surveillance	Female	77	Symptomatic		Original	Nasopharyngeal swab		AY.4	GK	T95I,G142D,P681R,R158del,F157del,T19R,D950N,E156G,T478K,D614G,L452R	delta
hCoV-19/Italy/APU-IZSPB-2594PT/2021	EPI_ISL_3846614	2021-08-16	Europe / Italy / Apulia / Lecce / Lecce	Human			Female	17	Asymptomatic		Original	Nasopharyngeal Swab		AY.9.2	GK	P681R,R158del,F157del,T19R,A222V,D950N,E156G,T478K,D614G,L452R)	delta
hCoV-19/Italy/APU-IZSPB-2930PT/2021	EPI_ISL_3846698	2021-08-30	Europe / Italy / Apulia / Taranto / Taranto	Human			Female	44	Asymptomatic		Original	Nasopharyngeal Swab		AY.46.6	GK	P681R,R158del,D950B,F157del,T19R,E156G,T478R,D614G,L452R)	delta
hCoV-19/Belgium/IPG-601/2021	EPI_ISL_3907948	2021-08-16	Europe / Belgium / Wallonie	Human	ZIP: 7540		Female	11	Symptomatic		Original	Nasopharyngeal swab	surveillance	AY.43	GK	P681R,T19R,D950N,T478K,D614G,L452R	delta
hCoV-19/Belgium/IPG-599/2021	EPI_ISL_3907946	2021-08-22	Europe / Belgium / Wallonie	Human	ZIP: 6120		Male	65	Symptomatic		Original	Nasopharyngeal swab	surveillance	AY.43	GK	P681R,T19R,W258L,D950N,T478K,D614G,L452R	delta
hCoV-19/Belgium/IPG-621/2021	EPI_ISL_3909458	2021-08-24	Europe / Belgium / Wallonie	Human	ZIP: 5540		Male	10	Symptomatic		Original	Nasopharyngeal swab	surveillance	AY.98.1	GK	P251L,P681R,R158del,F157del,T19R,D950N,E156G,T478K,D614G,L452R	delta
hCoV-19/Italy/FVG-UD-64030516/2021	EPI_ISL_4188719	2021-08-24	Europe / Italy / Friuli Venezia Giulia	Human		Contact tracing	Female	10	Asymptomatic	Not vaccinated	Original	Oropharyngeal swab		AY.42	GK	T95I,G142D,P681R,R158del,F157del,T19R,D950N,E156G,T478K,D614G,L452R)	delta
hCoV-19/Estonia/16913157/2021	EPI_ISL_4172324	2021-08-05	Europe / Estonia / Southern Estonia	Human			Male	31	Symptomatic		Original	Nasopharyngeal swab		AY.122	GK	C166S,G142D,S680P,P681R,R158del,F157del,T19R,D950N,L938F,E156G,T478K,D614G,L452R)	delta
hCoV-19/Estonia/17314473/2021	EPI_ISL_4106557	2021-07-24	Europe / Estonia / Southern Estonia	Human			Female	26	Symptomatic		Original	Nasopharengeal swab		AY.100	GK	T95I,G142D,L5F,P681R,R158del,F157del,T19R,D950N,E156G,T478K,D614G,L452R)	delta
hCoV-19/Estonia/RC0034143/2021	EPI_ISL_4106486	2021-07-25	Europe / Estonia / Northern Estonia	Human			Female	31	Symptomatic		Original	Nasopharengeal swab		AY.122	GK	G142D,P681R,R158del,F157del,T19R,D950N,E156G,T478K,D614G,L452R)	delta
hCoV-19/Estonia/16915247/2021	EPI_ISL_4172326	2021-08-05	Europe / Estonia / Northern Estonia	Human			Female	12	Symptomatic		Original	Nasopharyngeal swab		AY.122	GK	C166S,G142D,S680P,P681R,R158del,F157del,T19R,D950N,E156G,T478K,D614G,L452R)	delta
hCoV-19/Estonia/16918614/2021	EPI_ISL_4172328	2021-08-05	Europe / Estonia / Southern Estonia	Human			Male	28	Symptomatic		Original	Nasopharyngeal swab		AY.122	GK	G142D,S680P,P681R,R158del,F157del,T19R,D950N,E156G,T478K,D614G,L452R)	delta
hCoV-19/Estonia/17005543/2021	EPI_ISL_4172333	2021-08-04	Europe / Estonia	Human			Female	2	Symptomatic		Original	Nasopharyngeal swab		AY.122	GK	C166S,G142D,S680P,P681R,R158del,F157del,T19R,D950N,E156G,T478K,D614G,L452R)	delta
hCoV-19/Estonia/RC0040908/2021	EPI_ISL_4172365	2021-08-04	Europe / Estonia / Northern Estonia	Human			Female	17	Symptomatic		Original	Nasopharyngeal swab		AY.122	GK	G142D,P681R,R158del,F157del,T19R,D950N,E156G,T478K,A570S,D614G,L452R)	delta
hCoV-19/Estonia/RC0041064/2021	EPI_ISL_4172368	2021-08-05	Europe / Estonia	Human			Female	39	Symptomatic		Original	Nasopharyngeal swab		AY.122	GK	C166S,G142D,S680P,P681R,R158del,F157del,T19R,D950N,E156G,T478K,D614G,L452R)	delta
hCoV-19/Estonia/RC0041223/2021	EPI_ISL_4172372	2021-08-05	Europe / Estonia / Northern Estonia	Human			Female	34	Symptomatic		Original	Nasopharyngeal swab		AY.122.2	GK	G142D,P681R,R158del,F157del,T19R,D950N,E156G,T478K,A411S,D614G,L452R)	delta
hCoV-19/Estonia/RC0041276/2021	EPI_ISL_4172374	2021-08-05	Europe / Estonia / Northern Estonia	Human			Female	37	Symptomatic		Original	Nasopharyngeal swab		AY.122	GK	G142D,S680P,P681R,R158del,F157del,T19R,D950N,E156G,T478K,D614G,L452R)	delta
hCoV-19/Estonia/RC0041663/2021	EPI_ISL_4172378	2021-08-05	Europe / Estonia / Northern Estonia	Human			Female	43	Symptomatic		Original	Nasopharyngeal swab		AY.122.2	GK	G142D,P681R,R158del,F157del,T19R,D950N,E156G,T478K,A411S,D614G,L452R)	delta
hCoV-19/Estonia/RC0043275/2021	EPI_ISL_4172390	2021-08-07	Europe / Estonia / Northern Estonia	Human			Female	44	Symptomatic		Original	Nasopharyngeal swab		AY.122	GK	C166S,G142D,S680P,P681R,R158del,F157del,T19R,D950N,E156G,T478K,D614G,L452R)	delta
hCoV-19/Estonia/RC0043419/2021	EPI_ISL_4172393	2021-08-07	Europe / Estonia / Northern Estonia	Human			Female	34	Symptomatic		Original	Nasopharyngeal swab		AY.122	GK	G142D,S680P,P681R,R158del,F157del,T19R,D950N,E156G,T478K,D614G,L452R)	delta
hCoV-19/Estonia/15904499/2021	EPI_ISL_4172401	2021-08-09	Europe / Estonia / Southern Estonia	Human			Male	12	Symptomatic		Original	Nasopharyngeal swab		B.1.617.2	GK	G142D,P681R,R158del,F157del,T19R,D950N,E156G,T478K,D614G,L452R)	delta
hCoV-19/Estonia/15904508/2021	EPI_ISL_4172402	2021-08-09	Europe / Estonia / Southern Estonia	Human			Male	25	Symptomatic		Original	Nasopharyngeal swab		AY.9.2	GK	G142D,P681R,R158del,F157del,T19R,A222V,D950N,E156G,T478K,D614G,L452R)	delta
hCoV-19/Estonia/16800958/2021	EPI_ISL_4172407	2021-08-10	Europe / Estonia	Human			Female	43	Symptomatic		Original	Nasopharyngeal swab		AY.122	GK	C166S,G142D,S680P,P681R,R158del,F157del,T19R,D950N,E156G,T478K,D614G,L452R)	delta
hCoV-19/Estonia/16915171/2021	EPI_ISL_4172410	2021-08-09	Europe / Estonia / Northern Estonia	Human			Female	5	Symptomatic		Original	Nasopharyngeal swab		AY.100	GK	T95I,G142D,L5F,P681R,R158del,F157del,T19R,D950N,E156G,T478K,D614G,L452R	delta
hCoV-19/Estonia/17851262/2021	EPI_ISL_4172428	2021-08-09	Europe / Estonia / Southern Estonia	Human			Male	27	Symptomatic		Original	Nasopharyngeal swab		B.1.617.2	GK	G142D,P681R,R158del,F157del,T19R,D950N,E156G,T478K,D614G,L452R)	delta
hCoV-19/Estonia/17178225/2021	EPI_ISL_4171789	2021-08-01	Europe / Estonia / Western Estonia	Human			Female	18	Symptomatic		Original	Nasopharengeal swab		AY.100	GK	T95I,G142D,L5F,P681R,R158del,F157del,T19R,D950N,E156G,T478K,D614G,L452R	delta
hCoV-19/Estonia/17188743/2021	EPI_ISL_4171796	2021-07-29	Europe / Estonia / Western Estonia	Human			Male	32	Symptomatic		Original	Nasopharengeal swab		AY.122	GK	G142D,S680P,P681R,R158del,F157del,T19R,D950N,E156G,T478K,D614G,L452R)	delta
hCoV-19/Estonia/17380066/2021	EPI_ISL_4171812	2021-07-31	Europe / Estonia / Northern Estonia	Human			Female	18	Symptomatic		Original	Nasopharengeal swab		AY.122	GK	K1191N,G142D,S680P,P681R,R158del,F157del,T19R,D950N,E156G,T478K,D614G,L452R)	delta
hCoV-19/Estonia/RC0036015/2021	EPI_ISL_4171819	2021-07-28	Europe / Estonia / Northern Estonia	Human			Female	10	Symptomatic		Original	Nasopharengeal swab		AY.100	GK	T95I,G142D,L5F,P681R,R158del,F157del,T19R,D950N,E156G,T478K,D614G,L452R)	delta
hCoV-19/Estonia/RC0036402/2021	EPI_ISL_4171826	2021-07-29	Europe / Estonia / Northern Estonia	Human			Female	29	Symptomatic		Original	Nasopharengeal swab		AY.122	GK	G142D,S680P,P681R,R158del,F157del,T19R,D950N,E156G,T478K,D614G,L452R)	delta
hCoV-19/Estonia/RC0037055/2021	EPI_ISL_4171834	2021-07-29	Europe / Estonia / Northern Estonia	Human			Female	21	Symptomatic		Original	Nasopharengeal swab		AY.122	GK	G142D,S680P,P681R,R158del,F157del,T19R,D950N,E156G,T478K,D614G,L452R)	delta
hCoV-19/Estonia/RC0037933/2021	EPI_ISL_4171844	2021-07-31	Europe / Estonia / Southern Estonia	Human			Female	23	Symptomatic		Original	Nasopharengeal swab		AY.122	GK	G142D,S680P,P681R,R158del,F157del,T19R,D950N,E156G,T478K,D614G,L452R)	delta
hCoV-19/Estonia/16918514/2021	EPI_ISL_4171868	2021-08-03	Europe / Estonia / Southern Estonia	Human			Female	27	Symptomatic		Original	Nasopharengeal swab		AY.122.2	GK	G142D,P681R,R158del,F157del,T19R,D950N,E156G,T478K,A411S,D614G,L452R)	delta
hCoV-19/Estonia/17178536/2021	EPI_ISL_4171882	2021-08-03	Europe / Estonia / Western Estonia	Human			Female	18	Symptomatic		Original	Nasopharengeal swab		AY.43	GK	G142D,P681R,R158del,F157del,T19R,D950N,E156G,T478K,D614G,L452R	delta
hCoV-19/Estonia/RC0039189/2021	EPI_ISL_4171904	2021-08-02	Europe / Estonia / Northern Estonia	Human			Male	20	Symptomatic		Original	Nasopharengeal swab		AY.122	GK	G142D,S680P,P681R,R158del,F157del,T19R,D950N,E156G,T478K,D614G,L452R)	delta
hCoV-19/Estonia/RC0039770/2021	EPI_ISL_4171928	2021-08-04	Europe / Estonia / Southern Estonia	Human			Male	23	Symptomatic		Original	Nasopharengeal swab		AY.122	GK	G142D,S680P,P681R,R158del,F157del,T19R,D950N,E156G,T478K,D614G,L452R)	delta
hCoV-19/Estonia/RC0038550/2021	EPI_ISL_4171952	2021-08-01	Europe / Estonia / Northern Estonia	Human			Female	31	Symptomatic		Original	Nasopharengeal swab		AY.78	GK	T95I,G142D,P681R,R158del,F157del,T19R,D950N,K814M,E156G,T478K,D614G,L452R)	delta
hCoV-19/Estonia/16760863/2021	EPI_ISL_4171773	2021-07-29	Europe / Estonia / Northern Estonia	Human			Female	29	Symptomatic		Original	Nasopharengeal swab		AY.100	GK	T95I,G142D,L5F,P681R,R158del,F157del,T19R,D950N,E156G,T478K,D614G,L452R)	delta
hCoV-19/Estonia/16963120/2021	EPI_ISL_4171778	2021-07-31	Europe / Estonia	Human			Male	20	Symptomatic		Original	Nasopharengeal swab		AY.122	GK	G142D,S680P,P681R,R158del,F157del,T19R,D950N,E156G,T478K,D614G,L452R)	delta
hCoV-19/Estonia/17096140/2021	EPI_ISL_4171783	2021-07-31	Europe / Estonia / Southern Estonia	Human			Male	24	Symptomatic		Original	Nasopharengeal swab		B.1.617.2	GK	G142D,P681R,R158del,F157del,T19R,D950N,E156G,T478K,D614G,L452R	delta
hCoV-19/Estonia/17314295/2021	EPI_ISL_4171804	2021-07-29	Europe / Estonia / Southern Estonia	Human			Male	26	Symptomatic		Original	Nasopharengeal swab		AY.100	GK	T95I,G142D,L5F,P681R,R158del,F157del,T19R,D950N,E156G,T478K,D614G,L452R)	delta
hCoV-19/Estonia/17188745/2021	EPI_ISL_4171797	2021-07-29	Europe / Estonia / Western Estonia	Human			Female	20	Symptomatic		Original	Nasopharengeal swab		AY.100	GK	T95I,V1230L,G142D,L5F,P681R,R158del,F157del,T19R,D950N,G232C,E156G,T478K,D614G,L452R)	delta
hCoV-19/Estonia/RC0036842/2021	EPI_ISL_4171829	2021-07-29	Europe / Estonia / Western Estonia	Human			Female	27	Symptomatic		Original	Nasopharengeal swab		AY.122	GK	G142D,P681R,R158del,F157del,T19R,Q613H,D950N,E156G,T478K,D614G,L452R)	delta
hCoV-19/Estonia/15924016/2021	EPI_ISL_4171852	2021-08-02	Europe / Estonia / Southern Estonia	Human			Male	27	Symptomatic		Original	Nasopharengeal swab		AY.122	GK	G142D,P681R,R158del,F157del,T19R,D950N,E156G,T478K,D614G,L452R	delta
hCoV-19/Estonia/16760904/2021	EPI_ISL_4171858	2021-08-02	Europe / Estonia	Human			Female	22	Symptomatic		Original	Nasopharengeal swab		AY.122	GK	G142D,S680P,P681R,R158del,F157del,T19R,D950N,E156G,T478K,D614G,L452R)	delta
hCoV-19/Estonia/16771266/2021	EPI_ISL_4171863	2021-08-02	Europe / Estonia / Northern Estonia	Human			Female	46	Symptomatic		Original	Nasopharengeal swab		AY.122	GK	G142D,S680P,P681R,R158del,F157del,T19R,D950N,E156G,T478K,D614G,L452R)	delta
hCoV-19/Estonia/16918435/2021	EPI_ISL_4171866	2021-08-04	Europe / Estonia / Southern Estonia	Human			Male	23	Symptomatic		Original	Nasopharengeal swab		AY.122.2	GK	G142D,P681R,R158del,F157del,T19R,D950N,E156G,T478K,A411S,D614G,L452R)	delta
hCoV-19/Estonia/16918670/2021	EPI_ISL_4171871	2021-08-03	Europe / Estonia / Southern Estonia	Human			Female	18	Symptomatic		Original	Nasopharengeal swab		AY.122.2	GK	G142D,P681R,R158del,F157del,T19R,D950N,E156G,T478K,A411S,D614G,L452R)	delta
hCoV-19/Estonia/RC0038659/2021	EPI_ISL_4171892	2021-08-01	Europe / Estonia / Northern Estonia	Human			Male	16	Symptomatic		Original	Nasopharengeal swab		AY.43	GK	G142D,P681R,R158del,F157del,T19R,D950N,E156G,T478K,D614G,L452R	delta
hCoV-19/Estonia/17319049/2021	EPI_ISL_4171885	2021-08-01	Europe / Estonia / Southern Estonia	Human			Female	52	Symptomatic		Original	Nasopharengeal swab		AY.100	GK	T95I,G142D,L5F,P681R,R158del,F157del,T19R,D950N,E156G,T478K,D614G,L452R)	delta
hCoV-19/Estonia/RC0038931/2021	EPI_ISL_4171894	2021-08-02	Europe / Estonia / Northern Estonia	Human			Female	64	Symptomatic		Original	Nasopharengeal swab		AY.122	GK	G142D,P681R,R158del,F157del,T19R,D950N,E156G,T478K,D614G,L452R)	delta
hCoV-19/Estonia/RC0039134/2021	EPI_ISL_4171900	2021-08-02	Europe / Estonia / Northern Estonia	Human			Male	35	Symptomatic		Original	Nasopharengeal swab		AY.122	GK	G142D,P681R,R158del,F157del,T19R,D950N,E156G,T478K,D614G,L452R)	delta
hCoV-19/Estonia/RC0039505/2021	EPI_ISL_4171914	2021-08-03	Europe / Estonia / Northern Estonia	Human			Female	27	Symptomatic		Original	Nasopharengeal swab		AY.122	GK	G142D,S680P,P681R,R158del,F157del,T19R,D950N,L938F,E156G,T478K,D614G,L452R)	delta
hCoV-19/Estonia/RC0039517/2021	EPI_ISL_4171916	2021-08-04	Europe / Estonia / Northern Estonia	Human			Female	52	Symptomatic		Original	Nasopharengeal swab		AY.60	GK	G142D,P681R,R158del,F157del,T19R,A222V,D950N,E156G,T478K,D614G,L452R)	delta
hCoV-19/Estonia/RC0041690/2021	EPI_ISL_4172379	2021-08-05	Europe / Estonia / Northern Estonia	Human			Female	34	Symptomatic		Original	Nasopharyngeal swab		AY.122.2	GK	C166S,G142D,P681R,R158del,F157del,T19R,D950N,E156G,T478K,A411S,D614G,L452R)	delta
hCoV-19/Estonia/17178755/2021	EPI_ISL_4172423	2021-08-11	Europe / Estonia / Western Estonia	Human			Male	27	Symptomatic		Original	Nasopharyngeal swab		AY.122	GK	G142D,P681R,R158del,F157del,T19R,D950N,E156G,T478K,A570S,D614G,L452R)	delta
hCoV-19/Estonia/17896694/2021	EPI_ISL_4172441	2021-08-11	Europe / Estonia / Northern Estonia	Human			Male	21	Symptomatic		Original	Nasopharyngeal swab		AY.122	GK	C166S,G142D,S680P,P681R,R158del,F157del,T19R,D950N,L938F,E156G,T478K,D614G,L452R)	delta
hCoV-19/Estonia/RC0045855/2021	EPI_ISL_4172495	2021-08-09	Europe / Estonia / Northern Estonia	Human			Male	5	Symptomatic		Original	Nasopharyngeal swab		AY.122	GK	G142D,S680P,P681R,R158del,F157del,T19R,D950N,L938F,E156G,T478K,D614G,L452R)	delta
hCoV-19/Estonia/17178809/2021	EPI_ISL_4172515	2021-08-11	Europe / Estonia / Western Estonia	Human			Female	24	Symptomatic		Original	Nasopharyngeal swab		AY.100	GK	T95I,G142D,L5F,P681R,R158del,F157del,T19R,D950N,E156G,T478K,D614G,L54F,L452R)	delta
hCoV-19/Estonia/16760972/2021	EPI_ISL_4106433	2021-07-27	Europe / Estonia	Human			Female	53	Symptomatic		Original	Nasopharengeal swab		AY.122	GK	G142D,P681R,R158del,F157del,T19R,D950N,E156G,T478K,D614G,L452R)	delta
hCoV-19/Estonia/16631781/2021	EPI_ISL_4106430	2021-07-28	Europe / Estonia / Southern Estonia	Human			Male	4	Symptomatic		Original	Nasopharengeal swab		AY.122	GK	G142D,S680P,P681R,R158del,F157del,T19R,D950N,E156G,T478K,D614G,L452R)	delta
hCoV-19/Estonia/16721561/2021	EPI_ISL_4106431	2021-07-25	Europe / Estonia / Western Estonia	Human			Male	41	Symptomatic		Original	Nasopharengeal swab		AY.122	GK	G142D,S680P,P681R,R158del,F157del,T19R,D950N,E156G,T478K,D614G,L452R)	delta
hCoV-19/Estonia/16783184/2021	EPI_ISL_4106437	2021-07-28	Europe / Estonia	Human			Male	16	Symptomatic		Original	Nasopharengeal swab		AY.122	GK	G142D,S680P,P681R,R158del,F157del,T19R,D950N,E156G,T478K,D614G,L452R)	delta
hCoV-19/Estonia/16783160/2021	EPI_ISL_4106435	2021-07-28	Europe / Estonia / Southern Estonia	Human			Male	22	Symptomatic		Original	Nasopharengeal swab		AY.122	GK	G142D,S680P,P681R,R158del,F157del,T19R,D950N,L938F,E156G,T478K,D614G,L452R)	delta
hCoV-19/Estonia/16796307/2021	EPI_ISL_4106438	2021-07-28	Europe / Estonia / Northern Estonia	Human			Male	21	Symptomatic		Original	Nasopharengeal swab		AY.100	GK	T95I,G142D,L5F,P681R,R158del,F157del,T19R,D950N,E156G,T478K,D614G,L452R)	delta
hCoV-19/Estonia/16800226/2021	EPI_ISL_4106439	2021-07-28	Europe / Estonia	Human			Female	38	Symptomatic		Original	Nasopharengeal swab		AY.122	GK	G142D,L5F,P681R,R158del,F157del,T19R,D950N,E156G,T478K,D614G,L452R	delta
hCoV-19/Estonia/16800248/2021	EPI_ISL_4106440	2021-07-28	Europe / Estonia	Human			Male	24	Symptomatic		Original	Nasopharengeal swab		AY.122	GK	G142D,P681R,R158del,F157del,T19R,D950N,E156G,T478K,D614G,L452R)	delta
hCoV-19/Estonia/17005512/2021	EPI_ISL_4106443	2021-07-26	Europe / Estonia	Human			Female	22	Symptomatic		Original	Nasopharengeal swab		AY.122	GK	G142D,P681R,R158del,F157del,T19R,D950N,E156G,T478K,D614G,L452R)	delta
hCoV-19/Estonia/17080487/2021	EPI_ISL_4106444	2021-07-27	Europe / Estonia / Western Estonia	Human			Female	11	Symptomatic		Original	Nasopharengeal swab		AY.122	GK	G142D,S680P,P681R,R158del,F157del,T19R,D950N,E156G,T478K,D614G,L452R)	delta
hCoV-19/Estonia/17005239/2021	EPI_ISL_4106442	2021-07-28	Europe / Estonia	Human			Female	66	Symptomatic		Original	Nasopharengeal swab		AY.122	GK	G142D,P681R,R158del,F157del,T19R,D950N,E156G,T478K,D614G,P812S,L452R)	delta
hCoV-19/Estonia/17123503/2021	EPI_ISL_4106447	2021-07-27	Europe / Estonia / Western Estonia	Human			Male	24	Symptomatic		Original	Nasopharengeal swab		AY.43	GK	G142D,P681R,R158del,F157del,T19R,D950N,E156G,T478K,D614G,L452R	delta
hCoV-19/Estonia/17123512/2021	EPI_ISL_4106448	2021-07-27	Europe / Estonia / Western Estonia	Human			Female	51	Symptomatic		Original	Nasopharengeal swab		AY.122	GK	G142D,S680P,P681R,R158del,F157del,T19R,D950N,E156G,T478K,D614G,L452R)	delta
hCoV-19/Estonia/17080489/2021	EPI_ISL_4106445	2021-07-27	Europe / Estonia / Western Estonia	Human			Male	14	Symptomatic		Original	Nasopharengeal swab		AY.122	GK	G142D,S680P,P681R,R158del,F157del,T19R,D950N,E156G,T478K,D614G,L452R)	delta
hCoV-19/Estonia/17123531/2021	EPI_ISL_4106449	2021-07-27	Europe / Estonia / Western Estonia	Human			Male	23	Symptomatic		Original	Nasopharengeal swab		AY.100	GK	T95I,G142D,L5F,P681R,R158del,F157del,T19R,D950N,G232C,E156G,T478K,M153I,D614G,L452R)	delta
hCoV-19/Estonia/16631779/2021	EPI_ISL_4106429	2021-07-28	Europe / Estonia / Southern Estonia	Human			Male	33	Symptomatic		Original	Nasopharengeal swab		AY.122	GK	G142D,S680P,P681R,R158del,F157del,T19R,D950N,E156G,T478K,D614G,L452R)	delta
hCoV-19/Estonia/15857423/2021	EPI_ISL_4106426	2021-07-26	Europe / Estonia / Southern Estonia	Human			Male	30	Symptomatic		Original	Nasopharengeal swab		B.1.617.2	GK	G142D,P681R,R158del,F157del,T19R,D950N,E156G,T478K,D614G,L452R)	delta
hCoV-19/Estonia/16488176/2021	EPI_ISL_4106427	2021-07-27	Europe / Estonia / Western Estonia	Human			Female	35	Symptomatic		Original	Nasopharengeal swab		AY.100	GK	T95I,G142D,L5F,P681R,R158del,F157del,T19R,D950N,E156G,T478K,D614G,L452R)	delta
hCoV-19/Estonia/RC0034227/2021	EPI_ISL_4106490	2021-07-26	Europe / Estonia / Northern Estonia	Human			Female	13	Symptomatic		Original	Nasopharengeal swab		AY.100	GK	T95I,G142D,L5F,P681R,R158del,F157del,T19R,D950N,E156G,T478K,D614G,L452R)	delta
hCoV-19/Estonia/16631774/2021	EPI_ISL_4106428	2021-07-27	Europe / Estonia / Southern Estonia	Human			Female	0	Symptomatic		Original	Nasopharengeal swab		AY.122	GK	G142D,S680P,P681R,R158del,F157del,T19R,D950N,L938F,E156G,T478K,D614G,L452R)	delta
hCoV-19/Estonia/RC0034237/2021	EPI_ISL_4106491	2021-07-26	Europe / Estonia / Northern Estonia	Human			Female	33	Symptomatic		Original	Nasopharengeal swab		AY.5	GK	G142D,P681R,R158del,F157del,T19R,V70F,D950N,E156G,T478K,D614G,L452R)	delta
hCoV-19/Estonia/RC0034485/2021	EPI_ISL_4106495	2021-07-26	Europe / Estonia / Northern Estonia	Human			Male	30	Symptomatic		Original	Nasopharengeal swab		AY.122	GK	H655Y,G142D,S680P,P681R,R158del,F157del,T19R,D950N,E156G,T478K,D614G,L452R)	delta
hCoV-19/Estonia/RC0034400/2021	EPI_ISL_4106494	2021-07-26	Europe / Estonia / Northern Estonia	Human			Male	19	Symptomatic		Original	Nasopharengeal swab		AY.43	GK	G142D,P681R,R158del,F157del,T19R,D950N,E156G,T478K,D614G,L452R	delta
hCoV-19/Estonia/RC0034313/2021	EPI_ISL_4106493	2021-07-26	Europe / Estonia / Northern Estonia	Human			Male	14	Symptomatic		Original	Nasopharengeal swab		AY.122	GK	G142D,P681R,R158del,F157del,T19R,D950N,E156G,T478K,D614G,L452R)	delta
hCoV-19/Estonia/RC0034275/2021	EPI_ISL_4106492	2021-07-26	Europe / Estonia / Northern Estonia	Human			Female	22	Symptomatic		Original	Nasopharengeal swab		AY.122	GK	G142D,S680P,P681R,R158del,F157del,T19R,D950N,L938F,E156G,T478K,D614G,L452R)	delta
hCoV-19/Estonia/RC0034553/2021	EPI_ISL_4106496	2021-07-26	Europe / Estonia	Human			Female	16	Symptomatic		Original	Nasopharengeal swab		AY.122	GK	G142D,S680P,P681R,R158del,F157del,T19R,D950N,E156G,T478K,D614G,L452R)	delta
hCoV-19/Estonia/RC0034593/2021	EPI_ISL_4106498	2021-07-26	Europe / Estonia	Human			Female	40	Symptomatic		Original	Nasopharengeal swab		AY.122	GK	G142D,P681R,R158del,F157del,T19R,D950N,E156G,T478K,D614G,L452R)	delta
hCoV-19/Estonia/17346171/2021	EPI_ISL_4106472	2021-07-27	Europe / Estonia / Southern Estonia	Human			Male	23	Symptomatic		Original	Nasopharengeal swab		AY.9.2	GK	G142D,P681R,R158del,F157del,T19R,A222V,D950N,E156G,T478K,V642A,D614G,L452R)	delta
hCoV-19/Estonia/17341913/2021	EPI_ISL_4106470	2021-07-25	Europe / Estonia / Southern Estonia	Human			Male	33	Symptomatic		Original	Nasopharengeal swab		AY.122	GK	G142D,S680P,P681R,R158del,F157del,T19R,D950N,L938F,E156G,T478K,D614G,L452R)	delta
hCoV-19/Estonia/RC0034559/2021	EPI_ISL_4106497	2021-07-26	Europe / Estonia / Northern Estonia	Human			Female	27	Symptomatic		Original	Nasopharengeal swab		AY.100	GK	T95I,G142D,L5F,P681R,R158del,F157del,T19R,D950N,E156G,T478K,D614G,L452R)	delta
hCoV-19/Estonia/17346154/2021	EPI_ISL_4106471	2021-07-28	Europe / Estonia / Southern Estonia	Human			Male	21	Symptomatic		Original	Nasopharengeal swab		AY.122.2	GK	G142D,P681R,R158del,F157del,T19R,D950N,E156G,T478K,A411S,D614G,L452R)	delta
hCoV-19/Estonia/17346230/2021	EPI_ISL_4106474	2021-07-28	Europe / Estonia / Southern Estonia	Human			Male	19	Symptomatic		Original	Nasopharengeal swab		AY.100	GK	T95I,G142D,L5F,P681R,R158del,F157del,T19R,D950N,E156G,T478K,D614G,L452R)	delta
hCoV-19/Estonia/17351842/2021	EPI_ISL_4106477	2021-07-26	Europe / Estonia / Southern Estonia	Human			Female	32	Symptomatic		Original	Nasopharengeal swab		AY.43	GK	G142D,P681R,R158del,F157del,T19R,D950N,E156G,T478K,D614G,L452R)	delta
hCoV-19/Estonia/17351954/2021	EPI_ISL_4106478	2021-07-26	Europe / Estonia / Southern Estonia	Human			Male	41	Symptomatic		Original	Nasopharengeal swab		AY.100	GK	T95I,G142D,L5F,P681R,R158del,F157del,T19R,D950N,E156G,T478K,D614G,L452R)	delta
hCoV-19/Estonia/17351810/2021	EPI_ISL_4106475	2021-07-26	Europe / Estonia / Southern Estonia	Human			Female	20	Symptomatic		Original	Nasopharengeal swab		AY.122.2	GK	G142D,P681R,R158del,F157del,T19R,D950N,E156G,T478K,A411S,D614G,L452R)	delta
hCoV-19/Estonia/17351965/2021	EPI_ISL_4106480	2021-07-26	Europe / Estonia / Southern Estonia	Human			Male	31	Symptomatic		Original	Nasopharengeal swab		AY.122	GK	H655Y,G142D,S680P,P681R,R158del,F157del,T19R,D950N,E156G,T478K,D614G,L452R)	delta
hCoV-19/Estonia/17351964/2021	EPI_ISL_4106479	2021-07-26	Europe / Estonia / Southern Estonia	Human			Male	37	Symptomatic		Original	Nasopharengeal swab		AY.122	GK	G142D,S680P,P681R,R158del,F157del,T19R,D950N,E156G,T478K,D614G,L452R)	delta
hCoV-19/Estonia/17362921/2021	EPI_ISL_4106482	2021-07-26	Europe / Estonia	Human			Female	33	Symptomatic		Original	Nasopharengeal swab		AY.122	GK	G142D,P681R,R158del,F157del,T19R,D950N,E156G,T478K,D614G,L452R)	delta
hCoV-19/Estonia/17351968/2021	EPI_ISL_4106481	2021-07-25	Europe / Estonia / Southern Estonia	Human			Female	51	Symptomatic		Original	Nasopharengeal swab		AY.122	GK	G142D,S680P,P681R,R158del,F157del,T19R,D950N,E156G,T478K,D614G,L452R)	delta
hCoV-19/Estonia/RC0034131/2021	EPI_ISL_4106485	2021-07-25	Europe / Estonia / Northern Estonia	Human			Male	38	Symptomatic		Original	Nasopharengeal swab		AY.100	GK	T95I,T1231I,G142D,L5F,P681R,R158del,F157del,T19R,D950N,E156G,T478K,D614G,L452R)	delta
hCoV-19/Estonia/RC0034148/2021	EPI_ISL_4106487	2021-07-25	Europe / Estonia / Northern Estonia	Human			Female	36	Symptomatic		Original	Nasopharengeal swab		AY.100	GK	T95I,G142D,L5F,P681R,R158del,F157del,T19R,D950N,E156G,T478K,D614G,L452R)	delta
hCoV-19/Estonia/RC0034220/2021	EPI_ISL_4106489	2021-07-26	Europe / Estonia / Northern Estonia	Human			Male	21	Symptomatic		Original	Nasopharengeal swab		AY.122	GK	G142D,S680P,P681R,R158del,F157del,T19R,D950N,E156G,T478K,D614G,L452R)	delta
hCoV-19/Estonia/17123616/2021	EPI_ISL_4106451	2021-07-28	Europe / Estonia / Western Estonia	Human			Male	24	Symptomatic		Original	Nasopharengeal swab		AY.100	GK	T95I,G142D,L5F,P681R,R158del,F157del,T19R,D950N,E156G,T478K,D614G,L452R	delta
hCoV-19/Estonia/17123679/2021	EPI_ISL_4106453	2021-07-27	Europe / Estonia / Western Estonia	Human			Male	27	Symptomatic		Original	Nasopharengeal swab		AY.100	GK	T95I,G142D,L5F,P681R,R158del,F157del,T19R,D950N,G232C,E156G,T478K,D614G,L452R)	delta
hCoV-19/Estonia/17123706/2021	EPI_ISL_4106455	2021-07-27	Europe / Estonia / Western Estonia	Human			Male	27	Symptomatic		Original	Nasopharengeal swab		AY.122	GK	G142D,P681R,R158del,F157del,T19R,D950N,E156G,T478K,D614G,L452R	delta
hCoV-19/Estonia/17123637/2021	EPI_ISL_4106452	2021-07-28	Europe / Estonia / Western Estonia	Human			Male	41	Symptomatic		Original	Nasopharengeal swab		AY.122	GK	G142D,S680P,P681R,R158del,F157del,T19R,D950N,E156G,T547I,T478K,D614G,L452R)	delta
hCoV-19/Estonia/17123902/2021	EPI_ISL_4106457	2021-07-27	Europe / Estonia / Western Estonia	Human			Male	21	Symptomatic		Original	Nasopharengeal swab		AY.122	GK	G142D,S680P,P681R,R158del,F157del,T19R,D950N,E156G,T478K,D614G,L452R)	delta
hCoV-19/Estonia/17123711/2021	EPI_ISL_4106456	2021-07-27	Europe / Estonia / Western Estonia	Human			Male	20	Symptomatic		Original	Nasopharengeal swab		AY.100	GK	T95I,G142D,L5F,P681R,R158del,F157del,T19R,D950N,E156G,T478K,D614G,L452R)	delta
hCoV-19/Estonia/17177656/2021	EPI_ISL_4106461	2021-07-27	Europe / Estonia / Southern Estonia	Human			Female	33	Symptomatic		Original	Nasopharengeal swab		AY.100	GK	T95I,G142D,L5F,P681R,R158del,F157del,T19R,D950N,E156G,T478K,D614G,L452R)	delta
hCoV-19/Estonia/17177651/2021	EPI_ISL_4106460	2021-07-27	Europe / Estonia / Southern Estonia	Human			Female	26	Symptomatic		Original	Nasopharengeal swab		AY.43	GK	G142D,P681R,R158del,F157del,T19R,D950N,E156G,T478K,D614G,L452R	delta
hCoV-19/Estonia/17187892/2021	EPI_ISL_4106462	2021-07-26	Europe / Estonia / Southern Estonia	Human			Male	38	Symptomatic		Original	Nasopharengeal swab		AY.122	GK	G142D,P681R,R158del,F157del,T19R,D950N,E156G,T478K,D614G,L452R	delta
hCoV-19/Estonia/17187975/2021	EPI_ISL_4106463	2021-07-27	Europe / Estonia / Southern Estonia	Human			Female	53	Symptomatic		Original	Nasopharengeal swab		AY.100	GK	T95I,G142D,L5F,P681R,R158del,F157del,T19R,D950N,E156G,T478K,D614G,L452R	delta
hCoV-19/Estonia/17188835/2021	EPI_ISL_4106465	2021-07-28	Europe / Estonia / Western Estonia	Human			Male	29	Symptomatic		Original	Nasopharengeal swab		AY.122.2	GK	G142D,P681R,R158del,F157del,T19R,D950N,E156G,T478K,A411S,D614G,L452R)	delta
hCoV-19/Estonia/17318946/2021	EPI_ISL_4106466	2021-07-28	Europe / Estonia	Human			Female	49	Symptomatic		Original	Nasopharengeal swab		AY.122	GK	G142D,P681R,R158del,F157del,T19R,D950N,E156G,T478K,D614G,L452R)	delta
hCoV-19/Estonia/17330690/2021	EPI_ISL_4106467	2021-07-27	Europe / Estonia / Northern Estonia	Human			Female	88	Asymptomatic		Original	Nasopharengeal swab		AY.122	GK	G142D,P681R,R158del,F157del,T19R,D950N,E156G,T478K,D614G,L452R)	delta
hCoV-19/Estonia/RC0033448/2021	EPI_ISL_4106601	2021-07-24	Europe / Estonia	Human			Female	33	Symptomatic		Original	Nasopharengeal swab		AY.124	GK	T95I,G142D,P681R,R158del,F157del,T19R,D950N,E156G,T478K,D614G,L452R)	delta
hCoV-19/Estonia/RC0033624/2021	EPI_ISL_4106602	2021-07-24	Europe / Estonia	Human			Female	16	Asymptomatic		Original	Nasopharengeal swab		AY.122	GK	G142D,S680P,P681R,R158del,F157del,T19R,D950N,E156G,T478K,D614G,L452R)	delta
hCoV-19/Estonia/RC0033718/2021	EPI_ISL_4106609	2021-07-24	Europe / Estonia / Northern Estonia	Human			Female	33	Symptomatic		Original	Nasopharengeal swab		AY.122	GK	G142D,P681R,R158del,F157del,T19R,D950N,E156G,T478K,D614G,L452R	delta
hCoV-19/Estonia/RC0033707/2021	EPI_ISL_4106608	2021-07-24	Europe / Estonia / Northern Estonia	Human			Male	10	Asymptomatic		Original	Nasopharengeal swab		AY.4	GK	T95I,G142D,P681R,R158del,F157del,T19R,D950N,E156G,T478K,D614G,L452R)	delta
hCoV-19/Estonia/17187544/2021	EPI_ISL_4106553	2021-07-22	Europe / Estonia / Southern Estonia	Human			Female	18	Symptomatic		Original	Nasopharengeal swab		AY.100	GK	T95I,G142D,L5F,P681R,R158del,F157del,T19R,D950N,E156G,T478K,D614G,L452R)	delta
hCoV-19/Estonia/17187564/2021	EPI_ISL_4106554	2021-07-21	Europe / Estonia / Southern Estonia	Human			Male	18	Symptomatic		Original	Nasopharengeal swab		AY.122.2	GK	G142D,P681R,R158del,F157del,T19R,D950N,E156G,T478K,A411S,D614G,L452R)	delta
hCoV-19/Estonia/17123840/2021	EPI_ISL_4106551	2021-07-24	Europe / Estonia / Western Estonia	Human			Male	28	Symptomatic		Original	Nasopharengeal swab		AY.100	GK	T95I,G142D,L5F,P681R,R158del,F157del,T19R,D950N,E156G,T478K,D614G,L452R	delta
hCoV-19/Estonia/17123847/2021	EPI_ISL_4106552	2021-07-24	Europe / Estonia / Western Estonia	Human			Female	21	Symptomatic		Original	Nasopharengeal swab		AY.122	GK	G142D,S680P,P681R,R158del,F157del,T19R,D950N,E156G,T478K,D614G,L452R)	delta
hCoV-19/Estonia/17187616/2021	EPI_ISL_4106555	2021-07-21	Europe / Estonia / Southern Estonia	Human			Male	27	Symptomatic		Original	Nasopharengeal swab		AY.122.2	GK	G142D,P681R,R158del,F157del,T19R,D950N,E156G,T478K,A411S,D614G,L452R)	delta
hCoV-19/Estonia/17314500/2021	EPI_ISL_4106558	2021-07-24	Europe / Estonia / Southern Estonia	Human			Female	21	Symptomatic		Original	Nasopharengeal swab		AY.122.2	GK	G142D,P681R,R158del,F157del,T19R,D950N,E156G,T478K,A411S,D614G,L452R)	delta
hCoV-19/Estonia/17187911/2021	EPI_ISL_4106556	2021-07-25	Europe / Estonia / Southern Estonia	Human			Male	29	Symptomatic		Original	Nasopharengeal swab		AY.43	GK	G142D,P681R,R158del,F157del,T19R,D950N,E156G,T478K,D614G,L452R	delta
hCoV-19/Estonia/17330125/2021	EPI_ISL_4106564	2021-07-23	Europe / Estonia / Southern Estonia	Human			Female	22	Symptomatic		Original	Nasopharengeal swab		AY.100	GK	T95I,G142D,L5F,P681R,R158del,F157del,T19R,D950N,E156G,T478K,D614G,L452R)	delta
hCoV-19/Estonia/17318609/2021	EPI_ISL_4106559	2021-07-23	Europe / Estonia	Human			Male	39	Symptomatic		Original	Nasopharengeal swab		AY.122	GK	G142D,S680P,P681R,R158del,F157del,T19R,D950N,E156G,T478K,D614G,L452R)	delta
hCoV-19/Estonia/17318612/2021	EPI_ISL_4106560	2021-07-23	Europe / Estonia	Human			Male	34	Symptomatic		Original	Nasopharengeal swab		AY.122	GK	G142D,S680P,P681R,R158del,F157del,T19R,D950N,E156G,T478K,D614G,L452R)	delta
hCoV-19/Estonia/17330415/2021	EPI_ISL_4106565	2021-07-24	Europe / Estonia / Southern Estonia	Human			Male	21	Symptomatic		Original	Nasopharengeal swab		AY.9.2	GK	G142D,P681R,R158del,F157del,T19R,A222V,D950N,E156G,T478K,E1151D,D614G,L452R)	delta
hCoV-19/Estonia/17330083/2021	EPI_ISL_4106562	2021-07-24	Europe / Estonia / Southern Estonia	Human			Male	18	Symptomatic		Original	Nasopharengeal swab		AY.122.2	GK	G142D,P681R,R158del,F157del,T19R,D950N,E156G,T478K,A411S,D614G,L452R)	delta
hCoV-19/Estonia/17330120/2021	EPI_ISL_4106563	2021-07-23	Europe / Estonia / Southern Estonia	Human			Female	37	Symptomatic		Original	Nasopharengeal swab		AY.122	GK	G142D,P681R,R158del,F157del,T19R,D950N,E156G,T478K,D614G,L452R)	delta
hCoV-19/Estonia/17380257/2021	EPI_ISL_4106569	2021-07-24	Europe / Estonia / Northern Estonia	Human			Male	2	Symptomatic		Original	Nasopharengeal swab		AY.43	GK	G142D,P681R,R158del,F157del,T19R,D950N,E156G,T478K,D614G,L452R	delta
hCoV-19/Estonia/17330483/2021	EPI_ISL_4106566	2021-07-21	Europe / Estonia / Southern Estonia	Human			Male	20	Symptomatic		Original	Nasopharengeal swab		AY.100	GK	T95I,G142D,L5F,P681R,R158del,F157del,T19R,D950N,E156G,T478K,D614G,L452R)	delta
hCoV-19/Estonia/17330547/2021	EPI_ISL_4106568	2021-07-22	Europe / Estonia / Southern Estonia	Human			Female	19	Symptomatic		Original	Nasopharengeal swab		AY.122	GK	G142D,P681R,R158del,A288V,F157del,T19R,D950N,E156G,T478K,D614G,L452R)	delta
hCoV-19/Estonia/16799109/2021	EPI_ISL_4106531	2021-07-21	Europe / Estonia	Human			Male	58	Symptomatic		Original	Nasopharengeal swab		AY.122	GK	G142D,P681R,R158del,F157del,T19R,D950N,E156G,T478K,D614G,L452R)	delta
hCoV-19/Estonia/17080602/2021	EPI_ISL_4106535	2021-07-22	Europe / Estonia / Western Estonia	Human			Male	30	Symptomatic		Original	Nasopharengeal swab		AY.100	GK	T95I,G142D,L5F,P681R,R158del,F157del,T19R,D950N,E156G,T478K,D614G,L452R)	delta
hCoV-19/Estonia/16796264/2021	EPI_ISL_4106530	2021-07-22	Europe / Estonia / Northern Estonia	Human			Female	0	Symptomatic		Original	Nasopharengeal swab		AY.100	GK	T95I,G142D,L5F,P681R,R158del,F157del,T19R,D950N,E156G,T478K,D614G,L452R)	delta
hCoV-19/Estonia/17123445/2021	EPI_ISL_4106539	2021-07-24	Europe / Estonia / Western Estonia	Human			Female	51	Symptomatic		Original	Nasopharengeal swab		AY.122	GK	G142D,P681R,R158del,F157del,T19R,V90F,D950N,E156G,T478K,D614G,L452R)	delta
hCoV-19/Estonia/17123307/2021	EPI_ISL_4106536	2021-07-22	Europe / Estonia / Western Estonia	Human			Male	19	Symptomatic		Original	Nasopharengeal swab		AY.100	GK	T95I,G142D,L5F,P681R,R158del,F157del,T19R,D950N,E156G,T478K,D614G,L452R)	delta
hCoV-19/Estonia/17123441/2021	EPI_ISL_4106538	2021-07-24	Europe / Estonia / Western Estonia	Human			Male	26	Symptomatic		Original	Nasopharengeal swab		AY.122.2	GK	G142D,P681R,R158del,F157del,T19R,D950N,E156G,T478K,A411S,D614G,L452R)	delta
hCoV-19/Estonia/17123585/2021	EPI_ISL_4106542	2021-07-23	Europe / Estonia / Western Estonia	Human			Male	21	Symptomatic		Original	Nasopharengeal swab		AY.100	GK	T95I,G142D,L5F,P681R,R158del,F157del,T19R,D950N,G232C,E156G,T478K,D614G,L452R)	delta
hCoV-19/Estonia/17123564/2021	EPI_ISL_4106541	2021-07-22	Europe / Estonia / Western Estonia	Human			Male	21	Symptomatic		Original	Nasopharengeal swab		AY.122	GK	G142D,S680P,P681R,R158del,F157del,T19R,D950N,E156G,T478K,D614G,L452R)	delta
hCoV-19/Estonia/17123593/2021	EPI_ISL_4106543	2021-07-24	Europe / Estonia / Western Estonia	Human			Female	46	Symptomatic		Original	Nasopharengeal swab		AY.100	GK	T95I,G142D,L5F,P681R,R158del,F157del,T19R,D950N,E156G,T478K,D614G,L452R)	delta
hCoV-19/Estonia/17123660/2021	EPI_ISL_4106544	2021-07-23	Europe / Estonia / Western Estonia	Human			Female	27	Symptomatic		Original	Nasopharengeal swab		AY.122	GK	G142D,S680P,P681R,R158del,F157del,T19R,D950N,E156G,T478K,D614G,L452R)	delta
hCoV-19/Estonia/17123816/2021	EPI_ISL_4106548	2021-07-22	Europe / Estonia / Western Estonia	Human			Male	20	Symptomatic		Original	Nasopharengeal swab		AY.100	GK	T95I,G142D,L5F,P681R,R158del,F157del,T19R,D950N,E156G,T478K,D614G,L452R)	delta
hCoV-19/Estonia/17123673/2021	EPI_ISL_4106545	2021-07-23	Europe / Estonia / Western Estonia	Human			Male	22	Symptomatic		Original	Nasopharengeal swab		AY.100	GK	I909V,T95I,G142D,L5F,P681R,R158del,F157del,T19R,D950N,E156G,T478K,D614G,L452R)	delta
hCoV-19/Estonia/RC0035098/2021	EPI_ISL_4106510	2021-07-27	Europe / Estonia / Northern Estonia	Human			Female	50	Symptomatic		Original	Nasopharengeal swab		AY.100	GK	T95I,G142D,L5F,P681R,R158del,F157del,T19R,D950N,E156G,T478K,D614G,L452R)	delta
hCoV-19/Estonia/17123830/2021	EPI_ISL_4106549	2021-07-24	Europe / Estonia / Western Estonia	Human			Female	29	Symptomatic		Original	Nasopharengeal swab		AY.43	GK	G142D,P681R,R158del,F157del,T19R,D950N,E156G,T478K,D614G,L452R	delta
hCoV-19/Estonia/RC0035291/2021	EPI_ISL_4106514	2021-07-27	Europe / Estonia / Western Estonia	Human			Female	60	Symptomatic		Original	Nasopharengeal swab		B.1.617.2	GK	T95I,G142D,P681R,R158del,F157del,T19R,D950N,T941A,E156G,T478K,D614G,L452R)	delta
hCoV-19/Estonia/RC0035273/2021	EPI_ISL_4106513	2021-07-27	Europe / Estonia / Northern Estonia	Human			Male	26	Symptomatic		Original	Nasopharengeal swab		AY.122	GK	G142D,S680P,P681R,R158del,F157del,T19R,D950N,E156G,T478K,D614G,L452R)	delta
hCoV-19/Estonia/RC0035103/2021	EPI_ISL_4106511	2021-07-27	Europe / Estonia / Northern Estonia	Human			Male	36	Symptomatic		Original	Nasopharengeal swab		AY.129	GK	T95I,G142D,P681R,R158del,F157del,T19R,D950N,E156G,T478K,D614G,L452R	delta
hCoV-19/Estonia/RC0035394/2021	EPI_ISL_4106517	2021-07-28	Europe / Estonia / Northern Estonia	Human			Female	40	Symptomatic		Original	Nasopharengeal swab		AY.122	GK	G142D,P681R,R158del,F157del,T19R,D950N,E156G,T478K,D614G,L452R	delta
hCoV-19/Estonia/16282913/2021	EPI_ISL_4106524	2021-07-21	Europe / Estonia	Human			Male	19	Symptomatic		Original	Nasopharengeal swab		AY.23	GK	V1264L,G142D,P681R,R158del,F157del,T19R,D950N,E156G,T478K,D614G,L452R)	delta
hCoV-19/Estonia/RC0035469/2021	EPI_ISL_4106520	2021-07-27	Europe / Estonia / Northern Estonia	Human			Female	21	Symptomatic		Original	Nasopharengeal swab		AY.122	GK	G142D,S680P,P681R,R158del,F157del,T19R,D950N,E156G,T478K,D614G,L452R)	delta
hCoV-19/Estonia/16488153/2021	EPI_ISL_4106525	2021-07-23	Europe / Estonia / Western Estonia	Human			Male	26	Symptomatic		Original	Nasopharengeal swab		AY.98.1	GK	G142D,P251L,P681R,R158del,F157del,T19R,D950N,E156G,T478K,D614G,L452R	delta
hCoV-19/Estonia/16282912/2021	EPI_ISL_4106523	2021-07-21	Europe / Estonia / Northern Estonia	Human			Male	19	Symptomatic		Original	Nasopharengeal swab		AY.122	GK	G142D,S680P,P681R,R158del,F157del,T19R,D950N,E156G,T478K,D614G,L452R	delta
hCoV-19/Estonia/15928918/2021	EPI_ISL_4106522	2021-07-22	Europe / Estonia / Southern Estonia	Human			Male	29	Symptomatic		Original	Nasopharengeal swab		AY.43	GK	G142D,P681R,R158del,F157del,T19R,D950N,E156G,T478K,D614G,L452R	delta
hCoV-19/Estonia/16783257/2021	EPI_ISL_4106528	2021-07-25	Europe / Estonia / Southern Estonia	Human			Female	19	Symptomatic		Original	Nasopharengeal swab		B.1.617.2	GK	T95I,G142D,P681R,R158del,F157del,T19R,D950N,E156G,T478K,D614G,L452R)	delta
hCoV-19/Estonia/RC0034817/2021	EPI_ISL_4106503	2021-07-26	Europe / Estonia / Northern Estonia	Human			Female	71	Symptomatic		Original	Nasopharengeal swab		AY.98.1	GK	G142D,P251L,P681R,R158del,F157del,T19R,D950N,E156G,T478K,D614G,L452R	delta
hCoV-19/Estonia/RC0034754/2021	EPI_ISL_4106502	2021-07-26	Europe / Estonia	Human			Female	26	Symptomatic		Original	Nasopharengeal swab		AY.100	GK	T95I,G142D,L5F,P681R,R158del,F157del,T19R,D950N,E156G,T478K,D614G,L452R)	delta
hCoV-19/Estonia/RC0034662/2021	EPI_ISL_4106500	2021-07-26	Europe / Estonia / Northern Estonia	Human			Female	41	Symptomatic		Original	Nasopharengeal swab		AY.122	GK	G142D,P681R,R158del,F157del,T19R,Q613H,D950N,E156G,T478K,D614G,L452R)	delta
hCoV-19/Estonia/RC0034678/2021	EPI_ISL_4106501	2021-07-26	Europe / Estonia / Northern Estonia	Human			Male	29	Symptomatic		Original	Nasopharengeal swab		AY.122	GK	G142D,S680P,P681R,R158del,F157del,T19R,D950N,E156G,T478K,D614G,L452R)	delta
hCoV-19/Estonia/RC0034847/2021	EPI_ISL_4106504	2021-07-27	Europe / Estonia / Northern Estonia	Human			Female	37	Symptomatic		Original	Nasopharengeal swab		AY.122	GK	G142D,P681R,R158del,F157del,T19R,D950N,E156G,T478K,D614G,L452R)	delta
hCoV-19/Estonia/RC0034859/2021	EPI_ISL_4106505	2021-07-27	Europe / Estonia / Northern Estonia	Human			Male	34	Symptomatic		Original	Nasopharengeal swab		AY.122	GK	G142D,P681R,R158del,F157del,T19R,D950N,E156G,T478K,D614G,L452R)	delta
hCoV-19/Estonia/RC0035031/2021	EPI_ISL_4106508	2021-07-27	Europe / Estonia / Northern Estonia	Human			Female	16	Symptomatic		Original	Nasopharengeal swab		AY.122	GK	G142D,P681R,R158del,F157del,T19R,D950N,E156G,T478K,D614G,L452R)	delta
hCoV-19/Estonia/RC0035034/2021	EPI_ISL_4106509	2021-07-27	Europe / Estonia / Northern Estonia	Human			Female	40	Symptomatic		Original	Nasopharengeal swab		AY.122	GK	G142D,P681R,R158del,F157del,T19R,D950N,E156G,T478K,D614G,L452R)	delta
hCoV-19/Estonia/RC0032277/2021	EPI_ISL_4106593	2021-07-22	Europe / Estonia / Southern Estonia	Human			Female	22	Symptomatic		Original	Nasopharengeal swab		AY.43	GK	G142D,P681R,R158del,F157del,T19R,D950N,E156G,T478K,D614G,L452R	delta
hCoV-19/Estonia/RC0032139/2021	EPI_ISL_4106590	2021-07-21	Europe / Estonia	Human			Female	57	Symptomatic		Original	Nasopharengeal swab		AY.122	GK	G142D,P681R,R158del,F157del,T19R,Q613H,D950N,E156G,T478K,D614G,L452R)	delta
hCoV-19/Estonia/RC0032255/2021	EPI_ISL_4106592	2021-07-22	Europe / Estonia / Northern Estonia	Human			Male	25	Symptomatic		Original	Nasopharengeal swab		AY.5	GK	G142D,P681R,R158del,F157del,T19R,D950N,E156G,T478K,D614G,L452R)	delta
hCoV-19/Estonia/RC0032486/2021	EPI_ISL_4106594	2021-07-22	Europe / Estonia / Northern Estonia	Human			Female	25	Symptomatic		Original	Nasopharengeal swab		AY.122	GK	G142D,P681R,R158del,F157del,T19R,D950N,E156G,T478K,D614G,L452R	delta
hCoV-19/Estonia/RC0032227/2021	EPI_ISL_4106591	2021-07-22	Europe / Estonia / Northern Estonia	Human			Female	28	Symptomatic		Original	Nasopharengeal swab		AY.122	GK	G142D,P681R,R158del,F157del,T19R,D950N,E156G,T478K,D614G,L452R)	delta
hCoV-19/Estonia/RC0032622/2021	EPI_ISL_4106597	2021-07-22	Europe / Estonia / Northern Estonia	Human			Male	30	Symptomatic		Original	Nasopharengeal swab		AY.122.2	GK	G142D,P681R,R158del,F157del,T19R,D950N,E156G,T478K,A411S,D614G,L452R)	delta
hCoV-19/Estonia/RC0033112/2021	EPI_ISL_4106598	2021-07-23	Europe / Estonia / Northern Estonia	Human			Male	18	Symptomatic		Original	Nasopharengeal swab		AY.122	GK	G142D,P681R,R158del,F157del,T19R,D950N,E156G,T478K,D614G,L452R)	delta
hCoV-19/Estonia/RC0032505/2021	EPI_ISL_4106595	2021-07-22	Europe / Estonia / Northern Estonia	Human			Female	32	Symptomatic		Original	Nasopharengeal swab		AY.100	GK	T95I,G142D,L5F,P681R,R158del,F157del,T19R,D950N,E156G,T478K,D614G,L452R)	delta
hCoV-19/Estonia/RC0033151/2021	EPI_ISL_4106599	2021-07-23	Europe / Estonia / Northern Estonia	Human			Male	29	Symptomatic		Original	Nasopharengeal swab		AY.122	GK	G142D,S680P,P681R,R158del,F157del,T19R,D950N,E156G,T478K,D614G,L452R)	delta
hCoV-19/Estonia/RC0032558/2021	EPI_ISL_4106596	2021-07-22	Europe / Estonia / Northern Estonia	Human			Male	49	Symptomatic		Original	Nasopharengeal swab		AY.43	GK	G142D,P681R,R158del,F157del,T19R,D950N,E156G,T478K,D614G,L452R	delta
hCoV-19/Estonia/210709373-01/2021	EPI_ISL_4106572	2021-07-21	Europe / Estonia	Human			unknown	unknown	Symptomatic		Original	Nasopharengeal swab		AY.34	GK	T95I,Q580H,G142D,P681R,R158del,F157del,Q677H,T19R,D950N,E156G,T478K,D614G,L452R)	delta
hCoV-19/Estonia/17380262/2021	EPI_ISL_4106571	2021-07-22	Europe / Estonia / Northern Estonia	Human			Male	60	Symptomatic		Original	Nasopharengeal swab		AY.122	GK	G142D,P681R,R158del,F157del,T19R,D950N,E156G,T478K,D614G,L452R)	delta
hCoV-19/Estonia/17380260/2021	EPI_ISL_4106570	2021-07-22	Europe / Estonia / Southern Estonia	Human			Female	18	Symptomatic		Original	Nasopharengeal swab		AY.9.2	GK	G142D,P681R,R158del,F157del,T19R,A222V,D950N,E156G,T478K,D614G,L452R)	delta
hCoV-19/Estonia/RC0031717/2021	EPI_ISL_4106575	2021-07-21	Europe / Estonia / Northern Estonia	Human			Male	14	Symptomatic		Original	Nasopharengeal swab		AY.122	GK	G142D,P681R,R158del,F157del,T19R,D950N,E156G,T478K,D614G,L452R)	delta
hCoV-19/Estonia/3642082-02/2021	EPI_ISL_4106573	2021-07-23	Europe / Estonia / Northern Estonia	Human			Female	3	Symptomatic		Original	Nasopharengeal swab		AY.122.2	GK	G142D,P681R,R158del,F157del,T19R,D950N,E156G,T478K,A411S,D614G,L452R)	delta
hCoV-19/Estonia/RC0031724/2021	EPI_ISL_4106576	2021-07-21	Europe / Estonia / Northern Estonia	Human			Female	33	Symptomatic		Original	Nasopharengeal swab		AY.122	GK	G142D,P681R,R158del,F157del,T19R,D950N,E156G,T478K,D614G,L452R	delta
hCoV-19/Estonia/RC0031725/2021	EPI_ISL_4106577	2021-07-21	Europe / Estonia / Northern Estonia	Human			Male	22	Symptomatic		Original	Nasopharengeal swab		AY.122	GK	G142D,P681R,R158del,F157del,T19R,D950N,E156G,T478K,D614G,L452R)	delta
hCoV-19/Estonia/RC0031728/2021	EPI_ISL_4106578	2021-07-21	Europe / Estonia / Northern Estonia	Human			Female	47	Symptomatic		Original	Nasopharengeal swab		AY.122	GK	G142D,S680P,P681R,R158del,F157del,T19R,D950N,L938F,E156G,T478K,D614G,L452R)	delta
hCoV-19/Estonia/RC0031898/2021	EPI_ISL_4106582	2021-07-21	Europe / Estonia / Southern Estonia	Human			Female	23	Symptomatic		Original	Nasopharengeal swab		AY.122.2	GK	G142D,P681R,R158del,F157del,T19R,D950N,E156G,T478K,A411S,D614G,L452R)	delta
hCoV-19/Estonia/RC0031925/2021	EPI_ISL_4106583	2021-07-21	Europe / Estonia / Northern Estonia	Human			Female	26	Symptomatic		Original	Nasopharengeal swab		AY.100	GK	T95I,G142D,L5F,P681R,R158del,F157del,T19R,D950N,E156G,T478K,D614G,L452R)	delta
hCoV-19/Estonia/RC0031823/2021	EPI_ISL_4106580	2021-07-21	Europe / Estonia / Northern Estonia	Human			Male	35	Symptomatic		Original	Nasopharengeal swab		AY.122	GK	G142D,P681R,R158del,F157del,T19R,D950N,E156G,T478K,D614G,L452R)	delta
hCoV-19/Estonia/RC0031653/2021	EPI_ISL_4106574	2021-07-21	Europe / Estonia / Northern Estonia	Human			Female	10	Symptomatic		Original	Nasopharengeal swab		AY.122	GK	G142D,S680P,P681R,R158del,F157del,T19R,D950N,L938F,E156G,T478K,D614G,L452R)	delta
hCoV-19/Estonia/RC0031781/2021	EPI_ISL_4106579	2021-07-21	Europe / Estonia / Northern Estonia	Human			Female	31	Symptomatic		Original	Nasopharengeal swab		AY.43	GK	G142D,P681R,R158del,F157del,T19R,D950N,E156G,T478K,D614G,L452R	delta
hCoV-19/Estonia/RC0032045/2021	EPI_ISL_4106587	2021-07-21	Europe / Estonia / Northern Estonia	Human			Male	19	Symptomatic		Original	Nasopharengeal swab		B.1.617.2	GK	T95I,G142D,P681R,R158del,F157del,T19R,D950N,E156G,T478K,D614G,C1243F,L452R)	delta
hCoV-19/Estonia/RC0031828/2021	EPI_ISL_4106581	2021-07-21	Europe / Estonia / Northern Estonia	Human			Male	21	Symptomatic		Original	Nasopharengeal swab		AY.122	GK	G142D,S680P,P681R,R158del,F157del,T19R,D950N,L938F,E156G,T478K,D614G,L452R)	delta
hCoV-19/Estonia/RC0032059/2021	EPI_ISL_4106588	2021-07-21	Europe / Estonia / Northern Estonia	Human			Male	26	Symptomatic		Original	Nasopharengeal swab		AY.122	GK	G142D,P681R,R158del,F157del,T19R,D950N,E156G,T478K,D614G,L452R)	delta
hCoV-19/Estonia/RC0031978/2021	EPI_ISL_4106585	2021-07-21	Europe / Estonia / Northern Estonia	Human			Female	33	Symptomatic		Original	Nasopharengeal swab		AY.100	GK	T95I,G142D,L5F,P681R,R158del,F157del,T19R,D950N,E156G,T478K,D614G,L452R)	delta
hCoV-19/Estonia/RC0032076/2021	EPI_ISL_4106589	2021-07-21	Europe / Estonia	Human			Female	25	Symptomatic		Original	Nasopharengeal swab		AY.122	GK	G142D,P681R,R158del,F157del,T19R,D950N,E156G,T478K,D614G,L452R)	delta
hCoV-19/Estonia/RC0033849/2021	EPI_ISL_4106612	2021-07-24	Europe / Estonia / Northern Estonia	Human			Male	27	Symptomatic		Original	Nasopharengeal swab		AY.122	GK	G142D,P681R,R158del,F157del,T19R,D950N,E156G,T478K,D614G,L452R	delta
hCoV-19/Estonia/RC0033842/2021	EPI_ISL_4106611	2021-07-24	Europe / Estonia / Northern Estonia	Human			Male	30	Symptomatic		Original	Nasopharengeal swab		AY.122	GK	G142D,S680P,P681R,R158del,F157del,T19R,D950N,E156G,T478K,D614G,L452R)	delta
hCoV-19/Estonia/RC0033630/2021	EPI_ISL_4106603	2021-07-24	Europe / Estonia	Human			Female	20	Symptomatic		Original	Nasopharengeal swab		AY.100	GK	T95I,G142D,L5F,P681R,R158del,F157del,T19R,D950N,G232C,E156G,T478K,D614G,L452R)	delta
hCoV-19/Estonia/RC0035344/2021	EPI_ISL_4106515	2021-07-28	Europe / Estonia / Northern Estonia	Human			Male	45	Symptomatic		Original	Nasopharengeal swab		AY.100	GK	T95I,G142D,L5F,P681R,R158del,F157del,T19R,D950N,E156G,T478K,D614G,L452R)	delta
hCoV-19/Estonia/RC0035434/2021	EPI_ISL_4106519	2021-07-27	Europe / Estonia / Northern Estonia	Human			Male	45	Symptomatic		Original	Nasopharengeal swab		AY.122	GK	G142D,P681R,R158del,F157del,T19R,D950N,E156G,T478K,D614G,L452R)	delta
hCoV-19/Estonia/15869690/2021	EPI_ISL_4106521	2021-07-24	Europe / Estonia / Southern Estonia	Human			Male	35	Symptomatic		Original	Nasopharengeal swab		AY.122	GK	G142D,P681R,R158del,F157del,T19R,D950N,E156G,T478K,D614G,L452R	delta
hCoV-19/Estonia/RC0047115/2021	EPI_ISL_4172513	2021-08-11	Europe / Estonia	Human			Female	43	Symptomatic		Original	Nasopharyngeal swab		AY.100	GK	T95I,G142D,L5F,P681R,R158del,F157del,T19R,D950N,E156G,T478K,D614G,L452R	delta
hCoV-19/Estonia/RC0046281/2021	EPI_ISL_4172500	2021-08-10	Europe / Estonia / Northern Estonia	Human			Female	10	Symptomatic		Original	Nasopharyngeal swab		AY.122	GK	G142D,P681R,R158del,F157del,T19R,D950N,E156G,T478K,A570S,D614G,L452R)	delta
hCoV-19/Estonia/15974172/2021	EPI_ISL_4172519	2021-08-06	Europe / Estonia / Southern Estonia	Human			Female	22	Symptomatic		Original	Nasopharyngeal swab		AY.4	GK	T95I,G142D,V1133I,T19R,D950N,T478K,P681R,R158del,F157del,E156G,K1073M,D614G,L452R	delta
hCoV-19/Estonia/RC0047095/2021	EPI_ISL_4172512	2021-08-11	Europe / Estonia	Human			Male	14	Symptomatic		Original	Nasopharyngeal swab		AY.122.2	GK	C166S,G142D,P681R,R158del,F157del,T19R,D950N,E156G,T478K,A411S,D614G,L452R)	delta
hCoV-19/Estonia/RC0040940/2021	EPI_ISL_4172516	2021-08-04	Europe / Estonia / Northern Estonia	Human			Female	23	Symptomatic		Original	Nasopharyngeal swab		B.1.617.2	GK	G142D,K77T,P681R,R158del,F157del,T19R,D950N,E156G,T478K,D614G,L452R)	delta
hCoV-19/Estonia/17318391/2021	EPI_ISL_4172522	2021-08-07	Europe / Estonia	Human			Female	42	Asymptomatic		Original	Nasopharyngeal swab		AY.122	GK	G142D,S680P,P681R,R158del,F157del,T19R,D950N,E156G,T478K,D614G,L452R)	delta
hCoV-19/Estonia/17178406/2021	EPI_ISL_4172518	2021-08-06	Europe / Estonia / Western Estonia	Human			Female	31	Symptomatic		Original	Nasopharyngeal swab		AY.124	GK	T95I,G142D,P681R,R158del,F157del,T19R,D950N,E156G,T478K,D614G,L452R)	delta
hCoV-19/Estonia/17154677/2021	EPI_ISL_4172517	2021-08-11	Europe / Estonia / Western Estonia	Human			Female	10	Symptomatic		Original	Nasopharyngeal swab		B.1.617.2	GK	C166S,G142D,K77T,P681R,R158del,F157del,T19R,D950N,E156G,T478K,D614G,L452R)	delta
hCoV-19/Estonia/RC0041670/2021	EPI_ISL_4172520	2021-08-05	Europe / Estonia / Northern Estonia	Human			Female	39	Symptomatic		Original	Nasopharyngeal swab		AY.122.2	GK	G142D,P681R,R158del,F157del,T19R,D950N,E156G,T478K,A411S,D614G,L452R)	delta
hCoV-19/Estonia/RC0046504/2021	EPI_ISL_4172503	2021-08-10	Europe / Estonia / Northern Estonia	Human			Female	18	Symptomatic		Original	Nasopharyngeal swab		AY.122.2	GK	C166S,G142D,P681R,L5I,R158del,F157del,T19R,D950N,E156G,T478K,A411S,D614G,L452R)	delta
hCoV-19/Estonia/17178715/2021	EPI_ISL_4172521	2021-08-06	Europe / Estonia / Western Estonia	Human			Male	10	Symptomatic		Original	Nasopharyngeal swab		AY.122	GK	G142D,P681R,R158del,F157del,T19R,D950N,E156G,T478K,A570S,D614G,L452R)	delta
hCoV-19/Estonia/RC0046595/2021	EPI_ISL_4172506	2021-08-11	Europe / Estonia / Northern Estonia	Human			Male	8	Asymptomatic		Original	Nasopharyngeal swab		AY.122	GK	G142D,S680P,P681R,R158del,F157del,T19R,D950N,E156G,T478K,D614G,L452R)	delta
hCoV-19/Estonia/RC0046435/2021	EPI_ISL_4172502	2021-08-10	Europe / Estonia / Northern Estonia	Human			Female	28	Symptomatic		Original	Nasopharyngeal swab		AY.122	GK	G142D,S680P,P681R,R158del,F157del,T19R,D950N,E156G,T478K,D614G,L452R)	delta
hCoV-19/Estonia/RC0046603/2021	EPI_ISL_4172508	2021-08-11	Europe / Estonia / Northern Estonia	Human			Female	76	Symptomatic		Original	Nasopharyngeal swab		AY.100	GK	T95I,G142D,L5F,P681R,R158del,F157del,T19R,D950N,E156G,T478K,D614G,L452R)	delta
hCoV-19/Estonia/RC0046597/2021	EPI_ISL_4172507	2021-08-11	Europe / Estonia / Northern Estonia	Human			Male	11	Asymptomatic		Original	Nasopharyngeal swab		AY.122	GK	G142D,P681R,R158del,F157del,T19R,D950N,E156G,T478K,D614G,L452R)	delta
hCoV-19/Estonia/RC0046594/2021	EPI_ISL_4172505	2021-08-10	Europe / Estonia / Northern Estonia	Human			Male	28	Symptomatic		Original	Nasopharyngeal swab		AY.9.2	GK	G142D,P681R,R158del,F157del,T19R,A222V,D950N,E156G,T478K,D614G,L452R)	delta
hCoV-19/Estonia/RC0046841/2021	EPI_ISL_4172511	2021-08-10	Europe / Estonia / Northern Estonia	Human			Male	42	Symptomatic		Original	Nasopharyngeal swab		AY.122	GK	G142D,P681R,R158del,F157del,T19R,D950N,E156G,T478K,D614G,L452R	delta
hCoV-19/Estonia/RC0046830/2021	EPI_ISL_4172510	2021-08-10	Europe / Estonia / Northern Estonia	Human			Male	24	Symptomatic		Original	Nasopharyngeal swab		AY.122	GK	C166S,G142D,P681R,R158del,F157del,T19R,D950N,E156G,T478K,A570S,D614G,L452R)	delta
hCoV-19/Estonia/RC0044570/2021	EPI_ISL_4172459	2021-08-09	Europe / Estonia / Northern Estonia	Human			Male	43	Symptomatic		Original	Nasopharyngeal swab		AY.100	GK	T95I,G142D,L5F,P681R,R158del,F157del,T19R,D950N,E156G,T478K,D614G,L452R)	delta
hCoV-19/Estonia/RC0044731/2021	EPI_ISL_4172462	2021-08-09	Europe / Estonia	Human			Female	49	Symptomatic		Original	Nasopharyngeal swab		AY.9.2	GK	C166S,G142D,P681R,R158del,F157del,T19R,A222V,D950N,E156G,T478K,D614G,L452R)	delta
hCoV-19/Estonia/RC0044563/2021	EPI_ISL_4172457	2021-08-09	Europe / Estonia / Northern Estonia	Human			Female	24	Symptomatic		Original	Nasopharyngeal swab		AY.122	GK	C166S,G142D,S680P,P681R,R158del,F157del,T19R,D950N,E156G,T478K,D614G,L452R)	delta
hCoV-19/Estonia/RC0044862/2021	EPI_ISL_4172466	2021-08-09	Europe / Estonia / Northern Estonia	Human			Male	42	Symptomatic		Original	Nasopharyngeal swab		B.1.617.2	GK	C166S,G142D,P681R,R158del,F157del,T19R,D950N,E156G,T478K,D614G,L452R)	delta
hCoV-19/Estonia/RC0044831/2021	EPI_ISL_4172464	2021-08-09	Europe / Estonia / Northern Estonia	Human			Female	37	Symptomatic		Original	Nasopharyngeal swab		AY.122	GK	C166S,G142D,S680P,P681R,R158del,F157del,T19R,D950N,L938F,E156G,T478K,D614G,L452R)	delta
hCoV-19/Estonia/RC0044400/2021	EPI_ISL_4172451	2021-08-08	Europe / Estonia / Northern Estonia	Human			Female	32	Symptomatic		Original	Nasopharyngeal swab		AY.122	GK	G142D,S680P,P681R,R158del,F157del,T19R,D950N,E156G,T478K,D614G,L452R)	delta
hCoV-19/Estonia/RC0044376/2021	EPI_ISL_4172447	2021-08-08	Europe / Estonia / Northern Estonia	Human			Male	55	Symptomatic		Original	Nasopharyngeal swab		AY.9.2	GK	G142D,P681R,R158del,F157del,T19R,A222V,D950N,E156G,T478K,D614G,L452R)	delta
hCoV-19/Estonia/RC0045103/2021	EPI_ISL_4172479	2021-08-09	Europe / Estonia / Northern Estonia	Human			Female	31	Symptomatic		Original	Nasopharyngeal swab		AY.9.2	GK	G142D,P681R,R158del,F157del,T19R,A222V,D950N,E156G,T478K,D614G,L452R)	delta
hCoV-19/Estonia/RC0044548/2021	EPI_ISL_4172455	2021-08-08	Europe / Estonia / Northern Estonia	Human			Female	24	Symptomatic		Original	Nasopharyngeal swab		AY.122	GK	G142D,P681R,R158del,F157del,T19R,D950N,E156G,T478K,A570S,D614G,L452R)	delta
hCoV-19/Estonia/RC0044494/2021	EPI_ISL_4172453	2021-08-08	Europe / Estonia / Northern Estonia	Human			Male	58	Symptomatic		Original	Nasopharyngeal swab		AY.122	GK	G142D,S680P,P681R,R158del,F157del,T19R,D950N,E156G,T478K,D614G,L452R)	delta
hCoV-19/Estonia/RC0045180/2021	EPI_ISL_4172481	2021-08-09	Europe / Estonia	Human			Female	47	Symptomatic		Original	Nasopharyngeal swab		AY.122	GK	C166S,G142D,S680P,P681R,R158del,F157del,T19R,D950N,E156G,T478K,D614G,L452R)	delta
hCoV-19/Estonia/RC0045198/2021	EPI_ISL_4172484	2021-08-09	Europe / Estonia / Northern Estonia	Human			Male	71	Symptomatic		Original	Nasopharyngeal swab		AY.122	GK	C166S,G142D,P681R,R158del,F157del,T19R,D950N,E156G,T478K,A570S,D614G,L452R)	delta
hCoV-19/Estonia/RC0045225/2021	EPI_ISL_4172485	2021-08-09	Europe / Estonia / Southern Estonia	Human			Male	48	Symptomatic		Original	Nasopharyngeal swab		AY.122	GK	C166S,G142D,S680P,P681R,R158del,F157del,T19R,D950N,E156G,T478K,D614G,L452R)	delta
hCoV-19/Estonia/RC0045191/2021	EPI_ISL_4172482	2021-08-09	Europe / Estonia / Northern Estonia	Human			Male	50	Symptomatic		Original	Nasopharyngeal swab		AY.100	GK	T95I,G142D,L5F,P681R,R158del,F157del,T19R,D950N,E156G,T478K,D614G,L452R)	delta
hCoV-19/Estonia/RC0045343/2021	EPI_ISL_4172489	2021-08-09	Europe / Estonia / Northern Estonia	Human			Female	37	Symptomatic		Original	Nasopharyngeal swab		AY.122	GK	C166S,G142D,P681R,R158del,F157del,T19R,D950N,E156G,T478K,D614G,L452R	delta
hCoV-19/Estonia/RC0045248/2021	EPI_ISL_4172487	2021-08-09	Europe / Estonia	Human			Male	37	Symptomatic		Original	Nasopharyngeal swab		AY.100	GK	T95I,G142D,L5F,P681R,R158del,F157del,T19R,D950N,E156G,T478K,D614G,L452R	delta
hCoV-19/Estonia/RC0045228/2021	EPI_ISL_4172486	2021-08-09	Europe / Estonia / Northern Estonia	Human			Female	78	Symptomatic		Original	Nasopharyngeal swab		AY.122	GK	C166S,G142D,P681R,R158del,F157del,T19R,D950N,E156G,T478K,A570S,D614G,L452R)	delta
hCoV-19/Estonia/RC0044902/2021	EPI_ISL_4172470	2021-08-09	Europe / Estonia / Northern Estonia	Human			Female	53	Symptomatic		Original	Nasopharyngeal swab		AY.122	GK	G142D,S680P,P681R,R158del,F157del,T19R,D950N,E156G,T478K,D614G,L452R)	delta
hCoV-19/Estonia/RC0044867/2021	EPI_ISL_4172468	2021-08-09	Europe / Estonia / Northern Estonia	Human			Male	56	Symptomatic		Original	Nasopharyngeal swab		AY.122.2	GK	C166S,G142D,P681R,R158del,F157del,T19R,D950N,E156G,H69Y,T478K,A411S,D614G,L452R)	delta
hCoV-19/Estonia/RC0044919/2021	EPI_ISL_4172472	2021-08-09	Europe / Estonia / Northern Estonia	Human			Male	36	Symptomatic		Original	Nasopharyngeal swab		AY.122	GK	C166S,G142D,S680P,P681R,R158del,F157del,T19R,D950N,L938F,E156G,T478K,D614G,L452R)	delta
hCoV-19/Estonia/RC0045073/2021	EPI_ISL_4172477	2021-08-09	Europe / Estonia / Northern Estonia	Human			Female	60	Symptomatic		Original	Nasopharyngeal swab		AY.122	GK	C166S,G142D,S680P,P681R,R158del,F157del,T19R,D950N,E156G,T478K,D614G,L452R)	delta
hCoV-19/Estonia/RC0045061/2021	EPI_ISL_4172475	2021-08-09	Europe / Estonia / Northern Estonia	Human			Female	43	Symptomatic		Original	Nasopharyngeal swab		AY.122	GK	C166S,G142D,P681R,R158del,F157del,T19R,D950N,E156G,T478K,D614G,L452R)	delta
hCoV-19/Estonia/RC0045870/2021	EPI_ISL_4172496	2021-08-10	Europe / Estonia	Human			Male	38	Symptomatic		Original	Nasopharyngeal swab		AY.122	GK	G142D,S680P,P681R,R158del,F157del,T19R,D950N,L938F,E156G,T478K,D614G,L452R)	delta
hCoV-19/Estonia/RC0045356/2021	EPI_ISL_4172491	2021-08-09	Europe / Estonia / Northern Estonia	Human			Male	38	Symptomatic		Original	Nasopharyngeal swab		AY.122	GK	G142D,P681R,R158del,F157del,T19R,D950N,E156G,T478K,D614G,L452R	delta
hCoV-19/Estonia/RC0045351/2021	EPI_ISL_4172490	2021-08-09	Europe / Estonia / Northern Estonia	Human			Female	67	Symptomatic		Original	Nasopharyngeal swab		AY.122	GK	G142D,P681R,R158del,F157del,T19R,D950N,E156G,T478K,A570S,D614G,L452R)	delta
hCoV-19/Estonia/RC0045670/2021	EPI_ISL_4172494	2021-08-09	Europe / Estonia / Northern Estonia	Human			Female	11	Symptomatic		Original	Nasopharyngeal swab		AY.122	GK	C166S,G142D,S680P,P681R,R158del,F157del,T19R,D950N,E156G,T478K,D614G,L452R)	delta
hCoV-19/Estonia/RC0045471/2021	EPI_ISL_4172493	2021-08-09	Europe / Estonia / Northern Estonia	Human			Female	28	Symptomatic		Original	Nasopharyngeal swab		AY.122	GK	C166S,G142D,S680P,P681R,R158del,F157del,T19R,D950N,L938F,E156G,T478K,D614G,L452R)	delta
hCoV-19/Estonia/RC0046280/2021	EPI_ISL_4172499	2021-08-10	Europe / Estonia / Northern Estonia	Human			Male	13	Symptomatic		Original	Nasopharyngeal swab		AY.9.2	GK	G142D,P681R,R158del,F157del,T19R,A222V,D950N,E156G,T478K,D614G,L452R)	delta
hCoV-19/Estonia/RC0046091/2021	EPI_ISL_4172498	2021-08-10	Europe / Estonia / Northern Estonia	Human			Female	37	Symptomatic		Original	Nasopharyngeal swab		AY.122	GK	C166S,G142D,P681R,R158del,F157del,T19R,D950N,E156G,T478K,D614G,L452R)	delta
hCoV-19/Estonia/RC0045921/2021	EPI_ISL_4172497	2021-08-10	Europe / Estonia / Southern Estonia	Human			Male	29	Symptomatic		Original	Nasopharyngeal swab		AY.122	GK	G142D,S680P,P681R,R158del,F157del,T19R,D950N,L938F,E156G,T478K,D614G,L452R)	delta
hCoV-19/Estonia/17330050/2021	EPI_ISL_4171887	2021-08-03	Europe / Estonia / Southern Estonia	Human			Female	18	Symptomatic		Original	Nasopharengeal swab		AY.122.2	GK	G142D,P681R,R158del,F157del,T19R,D950N,E156G,T478K,A411S,D614G,L452R)	delta
hCoV-19/Estonia/RC0038506/2021	EPI_ISL_4171890	2021-08-01	Europe / Estonia / Northern Estonia	Human			Male	16	Symptomatic		Original	Nasopharengeal swab		AY.122	GK	G142D,P681R,R158del,F157del,T19R,D950N,E156G,T478K,D614G,L452R	delta
hCoV-19/Estonia/RC0038558/2021	EPI_ISL_4171891	2021-08-01	Europe / Estonia / Northern Estonia	Human			Male	76	Symptomatic		Original	Nasopharengeal swab		AY.46.5	GK	G142D,P681R,R158del,F157del,T19R,D950N,E156G,T478K,D614G,L452R)	delta
hCoV-19/Estonia/RC0038471/2021	EPI_ISL_4171889	2021-08-01	Europe / Estonia	Human			Female	33	Symptomatic		Original	Nasopharengeal swab		AY.122	GK	G142D,P681R,R158del,F157del,T19R,D950N,E156G,T553I,T478K,D614G,L452R)	delta
hCoV-19/Estonia/17177474/2021	EPI_ISL_4171877	2021-08-04	Europe / Estonia / Southern Estonia	Human			Male	18	Symptomatic		Original	Nasopharengeal swab		AY.5	GK	G142D,P681R,R158del,F157del,T19R,D950N,E156G,T478K,D614G,L452R)	delta
hCoV-19/Estonia/17096128/2021	EPI_ISL_4171876	2021-08-03	Europe / Estonia / Southern Estonia	Human			Male	19	Symptomatic		Original	Nasopharengeal swab		AY.100	GK	T95I,G142D,L5F,P681R,R158del,F157del,T19R,D950N,E156G,T478K,D614G,L452R)	delta
hCoV-19/Estonia/17178157/2021	EPI_ISL_4171879	2021-08-04	Europe / Estonia / Western Estonia	Human			Male	45	Symptomatic		Original	Nasopharengeal swab		AY.100	GK	T95I,G142D,L5F,P681R,R158del,F157del,T19R,D950N,E156G,T478K,D614G,L452R)	delta
hCoV-19/Estonia/17178146/2021	EPI_ISL_4171878	2021-08-04	Europe / Estonia / Western Estonia	Human			Male	21	Symptomatic		Original	Nasopharengeal swab		AY.100	GK	T95I,G142D,L5F,P681R,R158del,F157del,T19R,D950N,G232C,E156G,T478K,D614G,L452R)	delta
hCoV-19/Estonia/17187707/2021	EPI_ISL_4171884	2021-08-03	Europe / Estonia / Southern Estonia	Human			Female	31	Symptomatic		Original	Nasopharengeal swab		AY.9.2	GK	G142D,P681R,R158del,F157del,T19R,A222V,D950N,E156G,T478K,D614G,L452R)	delta
hCoV-19/Estonia/17178303/2021	EPI_ISL_4171880	2021-08-04	Europe / Estonia / Western Estonia	Human			Female	46	Symptomatic		Original	Nasopharengeal swab		AY.122	GK	G142D,S680P,P681R,R158del,F157del,T19R,D950N,E156G,T478K,D614G,L452R)	delta
hCoV-19/Estonia/17187455/2021	EPI_ISL_4171883	2021-08-04	Europe / Estonia / Southern Estonia	Human			Female	29	Symptomatic		Original	Nasopharengeal swab		AY.100	GK	T95I,G142D,L5F,P681R,R158del,F157del,T19R,D950N,E156G,T478K,D614G,L452R)	delta
hCoV-19/Estonia/RC0039070/2021	EPI_ISL_4171898	2021-08-02	Europe / Estonia / Western Estonia	Human			Male	30	Symptomatic		Original	Nasopharengeal swab		AY.100	GK	T95I,G142D,L5F,P681R,R158del,F157del,T19R,D950N,E156G,T478K,D614G,L452R)	delta
hCoV-19/Estonia/17178514/2021	EPI_ISL_4171881	2021-08-03	Europe / Estonia / Western Estonia	Human			Male	29	Symptomatic		Original	Nasopharengeal swab		AY.43	GK	G142D,P681R,R158del,F157del,T19R,D950N,E156G,T478K,D614G,L452R	delta
hCoV-19/Estonia/RC0039020/2021	EPI_ISL_4171897	2021-08-02	Europe / Estonia / Northern Estonia	Human			Male	30	Symptomatic		Original	Nasopharengeal swab		AY.100	GK	T95I,G142D,L5F,P681R,R158del,F157del,T19R,D950N,E156G,T478K,D614G,L452R)	delta
hCoV-19/Estonia/RC0039071/2021	EPI_ISL_4171899	2021-08-02	Europe / Estonia / Western Estonia	Human			Female	31	Symptomatic		Original	Nasopharengeal swab		AY.100	GK	T95I,G142D,L5F,P681R,R158del,F157del,T19R,D950N,E156G,T478K,D614G,L452R)	delta
hCoV-19/Estonia/16721510/2021	EPI_ISL_4172319	2021-08-07	Europe / Estonia / Western Estonia	Human			Male	15	Symptomatic		Original	Nasopharyngeal swab		AY.100	GK	T95I,G142D,L5F,P681R,R158del,F157del,T19R,D950N,E156G,T478K,D614G,L452R)	delta
hCoV-19/Estonia/16581053/2021	EPI_ISL_4172317	2021-08-05	Europe / Estonia / Southern Estonia	Human			Female	20	Symptomatic		Original	Nasopharyngeal swab		AY.122	GK	G142D,S680P,P681R,R158del,F157del,T19R,D950N,E156G,T478K,D614G,L452R)	delta
hCoV-19/Estonia/15924087/2021	EPI_ISL_4172316	2021-08-07	Europe / Estonia / Southern Estonia	Human			Male	53	Symptomatic		Original	Nasopharyngeal swab		AY.100	GK	T95I,G142D,L5F,P681R,R158del,F157del,T19R,D950N,E156G,T478K,D614G,L452R)	delta
hCoV-19/Estonia/16581171/2021	EPI_ISL_4172318	2021-08-05	Europe / Estonia / Southern Estonia	Human			Female	20	Symptomatic		Original	Nasopharyngeal swab		AY.9.2	GK	G142D,P681R,R158del,F157del,T19R,A222V,D950N,E156G,T478K,D614G,L452R)	delta
hCoV-19/Estonia/16771422/2021	EPI_ISL_4172321	2021-08-04	Europe / Estonia / Northern Estonia	Human			Female	35	Symptomatic		Original	Nasopharyngeal swab		AY.122	GK	G142D,S680P,P681R,R158del,F157del,T19R,D950N,E156G,T478K,D614G,L452R)	delta
hCoV-19/Estonia/16721519/2021	EPI_ISL_4172320	2021-08-07	Europe / Estonia / Western Estonia	Human			Male	29	Symptomatic		Original	Nasopharyngeal swab		AY.100	GK	T95I,G142D,L5F,P681R,R158del,F157del,T19R,D950N,E156G,T478K,D614G,L452R)	delta
hCoV-19/Estonia/16799211/2021	EPI_ISL_4172322	2021-08-05	Europe / Estonia	Human			Female	46	Symptomatic		Original	Nasopharyngeal swab		AY.100	GK	T95I,G142D,L5F,P681R,R158del,F157del,T19R,D950N,E156G,T478K,D614G,L452R	delta
hCoV-19/Estonia/17188875/2021	EPI_ISL_4171803	2021-07-30	Europe / Estonia / Western Estonia	Human			Male	2	Symptomatic		Original	Nasopharengeal swab		AY.122	GK	T95I,G142D,P681R,R158del,F157del,T19R,D950N,E156G,T478K,D614G,L452R)	delta
hCoV-19/Estonia/17188815/2021	EPI_ISL_4171801	2021-07-31	Europe / Estonia / Western Estonia	Human			Female	38	Symptomatic		Original	Nasopharengeal swab		AY.100	GK	T95I,G142D,L5F,P681R,R158del,F157del,T19R,D950N,E156G,T478K,D614G,L452R)	delta
hCoV-19/Estonia/17330167/2021	EPI_ISL_4171806	2021-07-29	Europe / Estonia / Southern Estonia	Human			Female	64	Symptomatic		Original	Nasopharengeal swab		AY.122.2	GK	G142D,P681R,R158del,F157del,T19R,D950N,E156G,T478K,A411S,D614G,L452R)	delta
hCoV-19/Estonia/17188870/2021	EPI_ISL_4171802	2021-07-30	Europe / Estonia / Western Estonia	Human			Female	26	Symptomatic		Original	Nasopharengeal swab		AY.122	GK	G142D,S680P,P681R,R158del,F157del,T19R,D950N,L938F,E156G,T478K,D614G,L452R)	delta
hCoV-19/Estonia/17330262/2021	EPI_ISL_4171807	2021-07-29	Europe / Estonia / Southern Estonia	Human			Female	26	Symptomatic		Original	Nasopharengeal swab		AY.122	GK	G142D,S680P,P681R,R158del,F157del,T19R,D950N,E156G,T478K,D614G,L452R)	delta
hCoV-19/Estonia/17314305/2021	EPI_ISL_4171805	2021-07-29	Europe / Estonia / Southern Estonia	Human			Male	31	Symptomatic		Original	Nasopharengeal swab		AY.100	GK	T95I,G142D,L5F,P681R,R158del,F157del,T19R,D950N,E156G,T478K,D614G,L452R	delta
hCoV-19/Estonia/17346116/2021	EPI_ISL_4171809	2021-07-28	Europe / Estonia / Southern Estonia	Human			Male	34	Asymptomatic		Original	Nasopharengeal swab		AY.122	GK	G142D,S680P,P681R,R158del,F157del,T19R,D950N,L938F,E156G,T478K,D614G,L452R)	delta
hCoV-19/Estonia/RC0036151/2021	EPI_ISL_4171820	2021-07-28	Europe / Estonia / Northern Estonia	Human			Female	42	Symptomatic		Original	Nasopharengeal swab		AY.122	GK	G142D,P681R,R158del,F157del,T19R,D950N,E156G,T478K,D614G,L452R	delta
hCoV-19/Estonia/RC0036225/2021	EPI_ISL_4171822	2021-07-28	Europe / Estonia / Northern Estonia	Human			Male	19	Symptomatic		Original	Nasopharengeal swab		AY.122	GK	G142D,S680P,P681R,R158del,F157del,T19R,D950N,E156G,T478K,D614G,L452R)	delta
hCoV-19/Estonia/RC0036506/2021	EPI_ISL_4171827	2021-07-29	Europe / Estonia / Northern Estonia	Human			Female	37	Symptomatic		Original	Nasopharengeal swab		AY.100	GK	T95I,G142D,L5F,P681R,R158del,F157del,T19R,D950N,E156G,T478K,D614G,L452R)	delta
hCoV-19/Estonia/RC0036258/2021	EPI_ISL_4171823	2021-07-28	Europe / Estonia / Northern Estonia	Human			Male	44	Symptomatic		Original	Nasopharengeal swab		AY.100	GK	T95I,G142D,L5F,P681R,R158del,F157del,T19R,D950N,E156G,T478K,D614G,L452R	delta
hCoV-19/Estonia/RC0035670/2021	EPI_ISL_4171813	2021-07-28	Europe / Estonia / Northern Estonia	Human			Female	8	Symptomatic		Original	Nasopharengeal swab		AY.100	GK	T95I,G142D,L5F,P681R,R158del,F157del,T19R,D950N,E156G,T478K,D614G,L452R)	delta
hCoV-19/Estonia/17351776/2021	EPI_ISL_4171810	2021-07-28	Europe / Estonia / Southern Estonia	Human			Female	29	Symptomatic		Original	Nasopharengeal swab		AY.122	GK	G142D,S680P,P681R,R158del,F157del,T19R,D950N,E156G,T478K,D614G,L452R)	delta
hCoV-19/Estonia/RC0037875/2021	EPI_ISL_4171843	2021-07-31	Europe / Estonia / Northern Estonia	Human			Female	4	Symptomatic		Original	Nasopharengeal swab		AY.122	GK	G142D,P681R,R158del,F157del,T19R,D950N,E156G,T478K,D614G,L452R	delta
hCoV-19/Estonia/RC0036003/2021	EPI_ISL_4171818	2021-07-28	Europe / Estonia / Northern Estonia	Human			Female	66	Symptomatic		Original	Nasopharengeal swab		AY.122	GK	G142D,S680P,P681R,R158del,F157del,T19R,D950N,E156G,T478K,D614G,L452R)	delta
hCoV-19/Estonia/RC0035810/2021	EPI_ISL_4171816	2021-07-28	Europe / Estonia / Northern Estonia	Human			Female	17	Symptomatic		Original	Nasopharengeal swab		AY.100	GK	T95I,G142D,L5F,P681R,R158del,S98F,F157del,T19R,D950N,E156G,T478K,D614G,L452R)	delta
hCoV-19/Estonia/RC0035845/2021	EPI_ISL_4171817	2021-07-28	Europe / Estonia / Northern Estonia	Human			Male	31	Symptomatic		Original	Nasopharengeal swab		AY.122	GK	G142D,P681R,R158del,F157del,T19R,D950N,E156G,T478K,D614G,L452R)	delta
hCoV-19/Estonia/RC0038314/2021	EPI_ISL_4171849	2021-07-31	Europe / Estonia / Northern Estonia	Human			Female	29	Symptomatic		Original	Nasopharengeal swab		AY.122	GK	G142D,S680P,P681R,R158del,F157del,T19R,D950N,E156G,T478K,D614G,L452R	delta
hCoV-19/Estonia/RC0038303/2021	EPI_ISL_4171848	2021-07-31	Europe / Estonia / Northern Estonia	Human			Female	20	Symptomatic		Original	Nasopharengeal swab		AY.122	GK	G142D,P681R,R158del,F157del,T19R,D950N,E156G,T478K,A570S,D614G,L452R)	delta
hCoV-19/Estonia/RC0037042/2021	EPI_ISL_4171833	2021-07-29	Europe / Estonia / Northern Estonia	Human			Female	54	Symptomatic		Original	Nasopharengeal swab		AY.122.2	GK	G142D,P681R,R158del,F157del,T19R,D950N,E156G,T478K,A411S,D614G,L452R)	delta
hCoV-19/Estonia/RC0037017/2021	EPI_ISL_4171832	2021-07-30	Europe / Estonia / Northern Estonia	Human			Female	21	Symptomatic		Original	Nasopharengeal swab		AY.122.2	GK	G142D,P681R,R158del,F157del,T19R,D950N,E156G,T478K,A411S,D614G,L452R)	delta
hCoV-19/Estonia/RC0037106/2021	EPI_ISL_4171835	2021-07-30	Europe / Estonia / Northern Estonia	Human			Female	17	Symptomatic		Original	Nasopharengeal swab		AY.122.2	GK	G142D,P681R,R158del,F157del,T19R,D950N,E156G,T478K,A411S,D614G,L452R	delta
hCoV-19/Estonia/RC0036958/2021	EPI_ISL_4171830	2021-07-30	Europe / Estonia / Northern Estonia	Human			Male	13	Symptomatic		Original	Nasopharengeal swab		AY.100	GK	T95I,T1231I,G142D,L5F,P681R,R158del,F157del,T19R,D950N,E156G,T478K,D614G,L452R)	delta
hCoV-19/Estonia/RC0037002/2021	EPI_ISL_4171831	2021-07-30	Europe / Estonia / Northern Estonia	Human			Female	33	Symptomatic		Original	Nasopharengeal swab		AY.122	GK	G142D,S680P,P681R,R158del,F157del,T19R,D950N,E156G,T478K,D614G,L452R)	delta
hCoV-19/Estonia/16918545/2021	EPI_ISL_4171869	2021-08-03	Europe / Estonia / Southern Estonia	Human			Female	30	Symptomatic		Original	Nasopharengeal swab		AY.122	GK	G142D,S680P,P681R,R158del,F157del,T19R,D950N,E156G,T478K,D614G,L452R)	delta
hCoV-19/Estonia/16797831/2021	EPI_ISL_4171865	2021-08-03	Europe / Estonia / Southern Estonia	Human			Male	33	Symptomatic		Original	Nasopharengeal swab		AY.122	GK	G142D,S680P,P681R,R158del,F157del,T19R,D950N,E156G,T478K,D614G,L452R)	delta
hCoV-19/Estonia/16918436/2021	EPI_ISL_4171867	2021-08-04	Europe / Estonia / Southern Estonia	Human			Male	19	Symptomatic		Original	Nasopharengeal swab		AY.100	GK	T95I,G142D,L5F,P681R,R158del,F157del,T19R,D950N,E156G,T478K,D614G,L452R)	delta
hCoV-19/Estonia/16918858/2021	EPI_ISL_4171873	2021-08-04	Europe / Estonia / Southern Estonia	Human			Male	17	Symptomatic		Original	Nasopharengeal swab		AY.100	GK	T95I,G142D,L5F,P681R,R158del,F157del,T19R,D950N,E156G,T478K,D614G,L452R)	delta
hCoV-19/Estonia/16760771/2021	EPI_ISL_4171855	2021-08-02	Europe / Estonia	Human			Male	52	Symptomatic		Original	Nasopharengeal swab		AY.122	GK	G142D,P681R,R158del,F157del,T19R,D950N,E156G,T478K,D614G,L452R)	delta
hCoV-19/Estonia/16760772/2021	EPI_ISL_4171856	2021-08-02	Europe / Estonia	Human			Male	54	Symptomatic		Original	Nasopharengeal swab		AY.122	GK	G142D,S680L,P681R,R158del,F157del,T19R,D950N,E156G,T478K,D614G,L452R)	delta
hCoV-19/Estonia/16760800/2021	EPI_ISL_4171857	2021-08-02	Europe / Estonia	Human			Female	1	Symptomatic		Original	Nasopharengeal swab		AY.122	GK	G142D,S680P,P681R,R158del,F157del,T19R,D950N,E156G,T478K,D614G,L452R)	delta
hCoV-19/Estonia/16771219/2021	EPI_ISL_4171862	2021-08-02	Europe / Estonia / Northern Estonia	Human			Female	24	Symptomatic		Original	Nasopharengeal swab		AY.122	GK	G142D,P681R,R158del,F157del,T19R,D950N,E156G,T478K,A570S,D614G,L452R	delta
hCoV-19/Estonia/17005651/2021	EPI_ISL_4172416	2021-08-08	Europe / Estonia	Human			Female	31	Symptomatic		Original	Nasopharyngeal swab		AY.9.2	GK	G142D,P681R,R158del,F157del,T19R,A222V,D950N,E156G,T478K,D614G,L452R)	delta
hCoV-19/Estonia/16918639/2021	EPI_ISL_4172414	2021-08-10	Europe / Estonia / Southern Estonia	Human			Female	56	Symptomatic		Original	Nasopharyngeal swab		AY.122	GK	C166S,G142D,S680P,P681R,R158del,F157del,T19R,D950N,E156G,T478K,D614G,L452R)	delta
hCoV-19/Estonia/15694789/2021	EPI_ISL_4172400	2021-08-10	Europe / Estonia / Southern Estonia	Human			Male	5	Symptomatic		Original	Nasopharyngeal swab		AY.4.5	GK	T95I,G142D,P681R,D1259Y,R158del,F157del,T19R,D950N,E156G,T478K,D614G,L452R)	delta
hCoV-19/Estonia/17178453/2021	EPI_ISL_4172422	2021-08-10	Europe / Estonia / Western Estonia	Human			Male	36	Symptomatic		Original	Nasopharyngeal swab		AY.122	GK	G142D,S680P,P681R,R158del,F157del,T19R,D950N,E156G,T478K,D614G,L452R)	delta
hCoV-19/Estonia/17152457/2021	EPI_ISL_4172420	2021-08-11	Europe / Estonia	Human			Male	5	Symptomatic		Original	Nasopharyngeal swab		AY.9.2	GK	G142D,P681R,R158del,F157del,T19R,A222V,D950N,E156G,T478K,D614G,L452R)	delta
hCoV-19/Estonia/16799182/2021	EPI_ISL_4172405	2021-08-11	Europe / Estonia	Human			Female	22	Symptomatic		Original	Nasopharyngeal swab		AY.122	GK	C166S,G142D,S680P,P681R,R158del,F157del,T19R,D950N,E156G,T478K,D614G,L452R)	delta
hCoV-19/Estonia/16918628/2021	EPI_ISL_4172413	2021-08-10	Europe / Estonia / Southern Estonia	Human			Female	51	Symptomatic		Original	Nasopharyngeal swab		AY.5	GK	C166S,G142D,P681R,R158del,F157del,T19R,D950N,E156G,T478K,D614G,L452R	delta
hCoV-19/Estonia/17152448/2021	EPI_ISL_4172419	2021-08-10	Europe / Estonia / Western Estonia	Human			Male	11	Symptomatic		Original	Nasopharyngeal swab		AY.9.2	GK	G142D,P681R,R158del,F157del,T19R,A222V,D950N,E156G,T478K,D614G,L452R)	delta
hCoV-19/Estonia/16789047/2021	EPI_ISL_4172404	2021-08-10	Europe / Estonia	Human			Male	52	Symptomatic		Original	Nasopharyngeal swab		AY.9.2	GK	G142D,P681R,R158del,F157del,T19R,A222V,D950N,E156G,T478K,D614G,L452R)	delta
hCoV-19/Estonia/16631908/2021	EPI_ISL_4172403	2021-08-11	Europe / Estonia / Southern Estonia	Human			Female	0	Symptomatic		Original	Nasopharyngeal swab		AY.100	GK	C166S,T95I,G142D,L5F,P681R,R158del,F157del,T19R,D950N,E156G,T478K,D614G,L452R)	delta
hCoV-19/Estonia/16913477/2021	EPI_ISL_4172409	2021-08-09	Europe / Estonia / Southern Estonia	Human			Male	18	Symptomatic		Original	Nasopharyngeal swab		AY.122.2	GK	G142D,P681R,R158del,F157del,T19R,D950N,E156G,T478K,A411S,D614G,L452R)	delta
hCoV-19/Estonia/17854855/2021	EPI_ISL_4172435	2021-08-09	Europe / Estonia / Southern Estonia	Human			Female	28	Symptomatic		Original	Nasopharyngeal swab		AY.9.2	GK	G142D,P681R,R158del,F157del,T19R,A222V,D950N,E156G,T478K,D614G,L452R)	delta
hCoV-19/Estonia/16913446/2021	EPI_ISL_4172408	2021-08-09	Europe / Estonia / Southern Estonia	Human			Female	24	Symptomatic		Original	Nasopharyngeal swab		AY.122	GK	C166S,G142D,S680P,P681R,R158del,F157del,T19R,D950N,L938F,E156G,T478K,D614G,L452R)	delta
hCoV-19/Estonia/16799190/2021	EPI_ISL_4172406	2021-08-11	Europe / Estonia	Human			Male	38	Symptomatic		Original	Nasopharyngeal swab		AY.122	GK	C166S,G142D,S680P,P681R,R158del,F157del,T19R,D950N,E156G,T478K,D614G,L452R)	delta
hCoV-19/Estonia/16918617/2021	EPI_ISL_4172411	2021-08-10	Europe / Estonia / Southern Estonia	Human			Female	19	Symptomatic		Original	Nasopharyngeal swab		AY.122	GK	G142D,P681R,R158del,F157del,T19R,D950N,E156G,T478K,D614G,L452R)	delta
hCoV-19/Estonia/17896698/2021	EPI_ISL_4172443	2021-08-11	Europe / Estonia / Southern Estonia	Human			Male	10	Symptomatic		Original	Nasopharyngeal swab		AY.122	GK	G142D,P681R,R158del,F157del,T19R,D950N,E156G,T478K,D614G,L452R,D830G)	delta
hCoV-19/Estonia/17896726/2021	EPI_ISL_4172445	2021-08-10	Europe / Estonia / Southern Estonia	Human			Male	54	Symptomatic		Original	Nasopharyngeal swab		AY.4.5	GK	T95I,G142D,P681R,D1259Y,R158del,F157del,T19R,D950N,E156G,T478K,D614G,L452R)	delta
hCoV-19/Estonia/17178867/2021	EPI_ISL_4172425	2021-08-10	Europe / Estonia / Western Estonia	Human			Female	51	Symptomatic		Original	Nasopharyngeal swab		AY.122.2	GK	G142D,P681R,R158del,F157del,T19R,D950N,E156G,T478K,A411S,D614G,L452R)	delta
hCoV-19/Estonia/17350224/2021	EPI_ISL_4172427	2021-08-09	Europe / Estonia / Southern Estonia	Human			Female	26	Symptomatic		Original	Nasopharyngeal swab		AY.100	GK	T95I,G142D,L5F,P681R,R158del,F157del,T19R,D950N,E156G,T478K,D614G,L452R)	delta
hCoV-19/Estonia/17178859/2021	EPI_ISL_4172424	2021-08-10	Europe / Estonia / Western Estonia	Human			Female	30	Symptomatic		Original	Nasopharyngeal swab		AY.122.2	GK	G142D,P681R,R158del,F157del,T19R,D950N,E156G,T478K,A411S,D614G,L452R)	delta
hCoV-19/Estonia/17851335/2021	EPI_ISL_4172429	2021-08-11	Europe / Estonia / Southern Estonia	Human			Female	47	Symptomatic		Original	Nasopharyngeal swab		AY.100	GK	T95I,G142D,L5F,P681R,R158del,F157del,T19R,D950N,E156G,T478K,D614G,L452R)	delta
hCoV-19/Estonia/17853508/2021	EPI_ISL_4172431	2021-08-10	Europe / Estonia / Southern Estonia	Human			Female	24	Symptomatic		Original	Nasopharyngeal swab		AY.4.5	GK	T95I,G142D,P681R,D1259Y,R158del,F157del,T19R,D950N,E156G,T478K,D614G,L452R)	delta
hCoV-19/Estonia/RC0039652/2021	EPI_ISL_4171923	2021-08-03	Europe / Estonia / Northern Estonia	Human			Male	33	Symptomatic		Original	Nasopharengeal swab		AY.122	GK	G142D,P681R,R158del,F157del,T19R,D950N,E156G,T478K,D614G,L452R	delta
hCoV-19/Estonia/RC0039613/2021	EPI_ISL_4171921	2021-08-03	Europe / Estonia / Northern Estonia	Human			Female	61	Symptomatic		Original	Nasopharengeal swab		AY.100	GK	T95I,G142D,L5F,P681R,R158del,F157del,T19R,D950N,E156G,T478K,D614G,L452R)	delta
hCoV-19/Estonia/RC0039487/2021	EPI_ISL_4171911	2021-08-03	Europe / Estonia / Western Estonia	Human			Male	21	Symptomatic		Original	Nasopharengeal swab		AY.122	GK	G142D,S680P,P681R,R158del,F157del,T19R,D950N,E156G,T478K,D614G,L452R)	delta
hCoV-19/Estonia/RC0039719/2021	EPI_ISL_4171926	2021-08-03	Europe / Estonia / Northern Estonia	Human			Female	28	Symptomatic		Original	Nasopharengeal swab		AY.122	GK	G142D,S680P,P681R,R158del,F157del,T19R,D950N,E156G,T478K,D614G,L452R	delta
hCoV-19/Estonia/RC0040058/2021	EPI_ISL_4171941	2021-08-03	Europe / Estonia	Human			Female	48	Symptomatic		Original	Nasopharengeal swab		AY.100	GK	T95I,G142D,L5F,P681R,R158del,F157del,T19R,D950N,E156G,T478K,D614G,L452R)	delta
hCoV-19/Estonia/RC0039590/2021	EPI_ISL_4171918	2021-08-03	Europe / Estonia / Northern Estonia	Human			Female	25	Symptomatic		Original	Nasopharengeal swab		AY.122	GK	G142D,S680P,P681R,R158del,F157del,T19R,D950N,E156G,T478K,D614G,L452R	delta
hCoV-19/Estonia/RC0040200/2021	EPI_ISL_4171948	2021-08-04	Europe / Estonia	Human			Female	35	Symptomatic		Original	Nasopharengeal swab		AY.122	GK	G142D,S680P,P681R,R158del,F157del,T19R,D950N,E156G,T478K,D614G,L452R)	delta
hCoV-19/Estonia/RC0040072/2021	EPI_ISL_4171944	2021-08-03	Europe / Estonia / Northern Estonia	Human			Male	41	Symptomatic		Original	Nasopharengeal swab		AY.122	GK	G142D,S680P,P681R,R158del,F157del,T19R,D950N,E156G,T478K,D614G,L452R	delta
hCoV-19/Estonia/RC0039936/2021	EPI_ISL_4171932	2021-08-04	Europe / Estonia / Northern Estonia	Human			Female	30	Symptomatic		Original	Nasopharengeal swab		AY.122	GK	G142D,P681R,R158del,F157del,T19R,D950N,E156G,T478K,A570S,D614G,L452R)	delta
hCoV-19/Estonia/RC0040296/2021	EPI_ISL_4171950	2021-08-04	Europe / Estonia / Southern Estonia	Human			Male	28	Symptomatic		Original	Nasopharengeal swab		AY.43	GK	G142D,E583D,P681R,R158del,F157del,T19R,D950N,E156G,T478K,D614G,L452R)	delta
hCoV-19/Estonia/RC0039970/2021	EPI_ISL_4171934	2021-08-04	Europe / Estonia / Northern Estonia	Human			Male	62	Symptomatic		Original	Nasopharengeal swab		AY.122	GK	G142D,P681R,R158del,F157del,T19R,D950N,E156G,T478K,D614G,L452R)	delta
hCoV-19/Estonia/RC0039786/2021	EPI_ISL_4171930	2021-08-03	Europe / Estonia / Northern Estonia	Human			Male	46	Symptomatic		Original	Nasopharengeal swab		AY.122	GK	G142D,S680P,P681R,R158del,F157del,T19R,D950N,E156G,T478K,D614G,L452R)	delta
hCoV-19/Estonia/RC0039982/2021	EPI_ISL_4171937	2021-08-04	Europe / Estonia	Human			Male	38	Symptomatic		Original	Nasopharengeal swab		AY.100	GK	T95I,G142D,L5F,P681R,R158del,F157del,T19R,D950N,E156G,T478K,D614G,L452R	delta
hCoV-19/Estonia/RC0039992/2021	EPI_ISL_4171939	2021-08-04	Europe / Estonia	Human			Male	32	Symptomatic		Original	Nasopharengeal swab		AY.100	GK	T95I,G142D,L5F,P681R,R158del,F157del,T19R,D950N,E156G,T478K,D614G,L452R)	delta
hCoV-19/Estonia/RC0039061/2021	EPI_ISL_4171969	2021-08-02	Europe / Estonia / Northern Estonia	Human			Female	26	Symptomatic		Original	Nasopharengeal swab		AY.122	GK	G142D,S680P,P681R,R158del,F157del,T19R,D950N,L189F,E156G,T478K,D614G,L452R)	delta
hCoV-19/Estonia/RC0036026/2021	EPI_ISL_4171962	2021-07-28	Europe / Estonia / Northern Estonia	Human			Male	18	Symptomatic		Original	Nasopharengeal swab		AY.122.2	GK	G142D,P681R,R158del,F157del,T19R,D950N,E156G,T478K,A411S,D614G,L452R)	delta
hCoV-19/Estonia/16721489/2021	EPI_ISL_4171972	2021-07-31	Europe / Estonia / Western Estonia	Human			Female	31	Symptomatic		Original	Nasopharengeal swab		AY.122	GK	G142D,S680P,P681R,R158del,F157del,T19R,D950N,E156G,T478K,D614G,L452R	delta
hCoV-19/Estonia/16760785/2021	EPI_ISL_4171967	2021-08-02	Europe / Estonia	Human			Male	21	Symptomatic		Original	Nasopharengeal swab		AY.122	GK	G142D,S680P,P681R,R158del,F157del,T19R,D950N,L189F,E156G,T478K,D614G,L452R)	delta
hCoV-19/Estonia/RC0038914/2021	EPI_ISL_4171976	2021-08-02	Europe / Estonia / Northern Estonia	Human			Male	16	Symptomatic		Original	Nasopharengeal swab		AY.122.2	GK	G142D,P681R,R158del,F157del,T19R,D950N,L189F,E156G,T478K,A411S,D614G,L452R	delta
hCoV-19/Estonia/RC0038368/2021	EPI_ISL_4171955	2021-08-01	Europe / Estonia / Northern Estonia	Human			Female	30	Symptomatic		Original	Nasopharengeal swab		AY.122	GK	G142D,P681R,R158del,F157del,T19R,D950N,E156G,T478K,A570S,D614G,L452R)	delta
hCoV-19/Estonia/16963071/2021	EPI_ISL_4171978	2021-08-02	Europe / Estonia	Human			Male	36	Symptomatic		Original	Nasopharengeal swab		AY.124	GK	T95I,G142D,P681R,R158del,F157del,T19R,D950N,L189F,E156G,T478K,D614G,L452R	delta
hCoV-19/Estonia/RC0039679/2021	EPI_ISL_4171974	2021-08-03	Europe / Estonia / Northern Estonia	Human			Female	45	Symptomatic		Original	Nasopharengeal swab		AY.122	GK	G142D,S680P,P681R,R158del,F157del,T19R,D950N,E156G,T478K,D614G,L452R)	delta
hCoV-19/Estonia/17178162/2021	EPI_ISL_4171980	2021-08-03	Europe / Estonia / Western Estonia	Human			Male	30	Symptomatic		Original	Nasopharengeal swab		AY.43	GK	G142D,P681R,R158del,F157del,T19R,D950N,E156G,T478K,D614G,L452R	delta
hCoV-19/Estonia/17154355/2021	EPI_ISL_4171982	2021-08-04	Europe / Estonia / Western Estonia	Human			Female	43	Symptomatic		Original	Nasopharengeal swab		AY.100	GK	T95I,G142D,L5F,P681R,R158del,F157del,T19R,D950N,G232C,L189F,E156G,T478K,D614G,L452R)	delta
hCoV-19/Estonia/RC0039175/2021	EPI_ISL_4171903	2021-08-02	Europe / Estonia / Northern Estonia	Human			Male	32	Symptomatic		Original	Nasopharengeal swab		AY.122	GK	G142D,S680P,P681R,R158del,F157del,T19R,D950N,E156G,T478K,D614G,L452R)	delta
hCoV-19/Estonia/RC0039169/2021	EPI_ISL_4171902	2021-08-02	Europe / Estonia / Northern Estonia	Human			Female	40	Symptomatic		Original	Nasopharengeal swab		AY.122	GK	G142D,P681R,R158del,F157del,T19R,Q613H,D950N,E156G,T478K,D614G,L452R)	delta
hCoV-19/Estonia/RC0039165/2021	EPI_ISL_4171901	2021-08-02	Europe / Estonia / Northern Estonia	Human			Female	28	Symptomatic		Original	Nasopharengeal swab		AY.122	GK	G142D,P681R,R158del,F157del,T19R,D950N,E156G,T478K,A570S,D614G,L452R)	delta
hCoV-19/Estonia/RC0039211/2021	EPI_ISL_4171906	2021-08-02	Europe / Estonia / Northern Estonia	Human			Male	24	Symptomatic		Original	Nasopharengeal swab		AY.122	GK	G142D,S680P,P681R,R158del,F157del,T19R,D950N,E156G,T478K,D614G,L452R)	delta
hCoV-19/Estonia/RC0039216/2021	EPI_ISL_4171907	2021-08-02	Europe / Estonia / Northern Estonia	Human			Female	46	Symptomatic		Original	Nasopharengeal swab		AY.100	GK	T95I,G142D,L5F,P681R,R158del,F157del,T19R,D950N,E156G,T478K,D614G,L452R)	delta
hCoV-19/Estonia/RC0039282/2021	EPI_ISL_4171909	2021-08-03	Europe / Estonia	Human			Female	51	Symptomatic		Original	Nasopharengeal swab		AY.122	GK	G142D,S680P,P681R,R158del,F157del,T19R,D950N,E156G,T478K,D614G,L452R)	delta
hCoV-19/Estonia/RC0039200/2021	EPI_ISL_4171905	2021-08-02	Europe / Estonia / Northern Estonia	Human			Male	16	Symptomatic		Original	Nasopharengeal swab		AY.4	GK	T95I,G142D,P681R,R158del,F157del,T19R,D950N,E156G,T478K,D614G,L452R	delta
hCoV-19/Estonia/17080860/2021	EPI_ISL_4172337	2021-08-05	Europe / Estonia / Southern Estonia	Human			Male	24	Symptomatic		Original	Nasopharyngeal swab		AY.122	GK	C166S,G142D,P681R,R158del,F157del,T19R,D950N,E156G,T478K,A570S,D614G,L452R)	delta
hCoV-19/Estonia/17152337/2021	EPI_ISL_4172338	2021-08-07	Europe / Estonia / Northern Estonia	Human			Female	5	Symptomatic		Original	Nasopharyngeal swab		AY.100	GK	T95I,G142D,L5F,P681R,R158del,F157del,T19R,D950N,E156G,T478K,D614G,L452R)	delta
hCoV-19/Estonia/17177451/2021	EPI_ISL_4172341	2021-08-04	Europe / Estonia / Southern Estonia	Human			Female	38	Symptomatic		Original	Nasopharyngeal swab		AY.122	GK	C166S,G142D,P681R,R158del,F157del,T19R,D950N,E156G,T478K,D614G,L452R)	delta
hCoV-19/Estonia/17154397/2021	EPI_ISL_4172340	2021-08-07	Europe / Estonia / Western Estonia	Human			Male	10	Asymptomatic		Original	Nasopharyngeal swab		AY.122	GK	C166S,G142D,S680P,P681R,R158del,F157del,T19R,D950N,L938F,E156G,T478K,D614G,L452R)	delta
hCoV-19/Estonia/17177721/2021	EPI_ISL_4172344	2021-08-05	Europe / Estonia / Southern Estonia	Human			Female	26	Symptomatic		Original	Nasopharyngeal swab		AY.122	GK	C166S,G142D,T778I,P681R,R158del,F157del,T19R,S691F,D950N,E156G,T478K,D614G,L452R)	delta
hCoV-19/Estonia/17177705/2021	EPI_ISL_4172342	2021-08-05	Europe / Estonia / Southern Estonia	Human			Male	29	Asymptomatic		Original	Nasopharyngeal swab		AY.122	GK	G142D,P681R,R158del,F157del,T19R,Q613H,D950N,E156G,T478K,D614G,L452R)	delta
hCoV-19/Estonia/16918970/2021	EPI_ISL_4172330	2021-08-07	Europe / Estonia / Southern Estonia	Human			Male	23	Symptomatic		Original	Nasopharyngeal swab		AY.122.2	GK	G142D,P681R,R158del,F157del,T19R,D950N,E156G,T478K,A411S,D614G,L452R)	delta
hCoV-19/Estonia/16913868/2021	EPI_ISL_4172325	2021-08-05	Europe / Estonia / Southern Estonia	Human			Male	31	Symptomatic		Original	Nasopharyngeal swab		AY.122	GK	G142D,S680P,P681R,R158del,F157del,T19R,D950N,E156G,T478K,D614G,L452R)	delta
hCoV-19/Estonia/16918815/2021	EPI_ISL_4172329	2021-08-05	Europe / Estonia / Southern Estonia	Human			Female	49	Symptomatic		Original	Nasopharyngeal swab		AY.100	GK	T95I,G142D,L5F,P681R,R158del,F157del,T19R,D950N,E156G,T478K,D614G,L452R)	delta
hCoV-19/Estonia/16963329/2021	EPI_ISL_4172331	2021-08-04	Europe / Estonia	Human			Female	37	Symptomatic		Original	Nasopharyngeal swab		AY.122	GK	C166S,G142D,S680P,P681R,R158del,F157del,T19R,D950N,L938F,E156G,T478K,D614G,L452R)	delta
hCoV-19/Estonia/17005548/2021	EPI_ISL_4172335	2021-08-04	Europe / Estonia / Northern Estonia	Human			Female	14	Symptomatic		Original	Nasopharyngeal swab		AY.100	GK	T95I,G142D,L5F,P681R,R158del,F157del,T19R,D950N,E156G,T478K,D614G,L452R)	delta
hCoV-19/Estonia/16963730/2021	EPI_ISL_4172332	2021-08-06	Europe / Estonia	Human			Female	11	Symptomatic		Original	Nasopharyngeal swab		AY.122	GK	C166S,G142D,S680P,P681R,R158del,F157del,T19R,D950N,E156G,T478K,D614G,L452R)	delta
hCoV-19/Estonia/17005544/2021	EPI_ISL_4172334	2021-08-04	Europe / Estonia	Human			Female	4	Symptomatic		Original	Nasopharyngeal swab		AY.122	GK	C166S,G142D,S680P,P681R,R158del,F157del,T19R,D950N,E156G,T478K,D614G,L452R)	delta
hCoV-19/Estonia/RC0040695/2021	EPI_ISL_4172360	2021-08-04	Europe / Estonia / Northern Estonia	Human			Female	42	Symptomatic		Original	Nasopharyngeal swab		AY.122	GK	C166S,G142D,S680P,P681R,R158del,F157del,T19R,D950N,E156G,T478K,D614G,L452R)	delta
hCoV-19/Estonia/RC0040665/2021	EPI_ISL_4172359	2021-08-04	Europe / Estonia / Northern Estonia	Human			Female	7	Symptomatic		Original	Nasopharyngeal swab		AY.122.2	GK	G142D,P681R,R158del,F157del,T19R,D950N,D1084Y,E156G,T478K,A411S,D614G,L452R)	delta
hCoV-19/Estonia/RC0040639/2021	EPI_ISL_4172358	2021-08-04	Europe / Estonia / Northern Estonia	Human			Female	32	Symptomatic		Original	Nasopharyngeal swab		AY.122	GK	C166S,G142D,S680P,P681R,R158del,F157del,T19R,D950N,E156G,T478K,D614G,L452R)	delta
hCoV-19/Estonia/RC0040846/2021	EPI_ISL_4172362	2021-08-04	Europe / Estonia / Northern Estonia	Human			Male	10	Symptomatic		Original	Nasopharyngeal swab		AY.9.2	GK	G142D,P681R,R158del,F157del,T19R,A222V,D950N,E156G,T478K,D614G,L452R)	delta
hCoV-19/Estonia/RC0040885/2021	EPI_ISL_4172364	2021-08-04	Europe / Estonia / Northern Estonia	Human			Male	41	Symptomatic		Original	Nasopharyngeal swab		AY.122.2	GK	G142D,P681R,R158del,F157del,T19R,D950N,E156G,T478K,A411S,D614G,L452R)	delta
hCoV-19/Estonia/RC0040884/2021	EPI_ISL_4172363	2021-08-04	Europe / Estonia / Northern Estonia	Human			Female	41	Symptomatic		Original	Nasopharyngeal swab		AY.122.2	GK	G142D,P681R,R158del,F157del,T19R,D950N,E156G,T478K,A411S,D614G,L452R)	delta
hCoV-19/Estonia/RC0040935/2021	EPI_ISL_4172366	2021-08-04	Europe / Estonia	Human			Female	25	Symptomatic		Original	Nasopharyngeal swab		AY.122	GK	C166S,G142D,S680P,P681R,R158del,F157del,T19R,D950N,E156G,T478K,D614G,L452R)	delta
hCoV-19/Estonia/RC0041037/2021	EPI_ISL_4172367	2021-08-04	Europe / Estonia / Northern Estonia	Human			Male	25	Symptomatic		Original	Nasopharyngeal swab		AY.100	GK	T95I,G142D,L5F,P681R,R158del,F157del,T19R,D950N,E156G,T478K,D614G,L452R)	delta
hCoV-19/Estonia/17851059/2021	EPI_ISL_4172353	2021-08-06	Europe / Estonia / Southern Estonia	Human			Male	23	Symptomatic		Original	Nasopharyngeal swab		AY.122	GK	G142D,S680P,P681R,R158del,F157del,T19R,D950N,L938F,E156G,T478K,D614G,L452R)	delta
hCoV-19/Estonia/17318978/2021	EPI_ISL_4172349	2021-08-07	Europe / Estonia	Human			Female	47	Symptomatic		Original	Nasopharyngeal swab		AY.122	GK	G142D,P681R,R158del,F157del,T19R,D950N,E156G,T478K,D614G,L452R	delta
hCoV-19/Estonia/17318507/2021	EPI_ISL_4172348	2021-08-04	Europe / Estonia	Human			Male	13	Symptomatic		Original	Nasopharyngeal swab		AY.122	GK	C166S,G142D,P681R,R158del,F157del,T19R,D950N,E156G,T478K,D614G,L452R)	delta
hCoV-19/Estonia/RC0040555/2021	EPI_ISL_4172357	2021-08-04	Europe / Estonia / Northern Estonia	Human			Female	24	Symptomatic		Original	Nasopharyngeal swab		AY.122	GK	G142D,S680P,P681R,R158del,F157del,T19R,D950N,L938F,E156G,T478K,D614G,L452R)	delta
hCoV-19/Estonia/17350325/2021	EPI_ISL_4172352	2021-08-07	Europe / Estonia / Southern Estonia	Human			Male	43	Symptomatic		Original	Nasopharyngeal swab		AY.122	GK	G142D,S680P,P681R,R158del,F157del,T19R,D950N,E156G,T478K,D614G,L452R)	delta
hCoV-19/Estonia/17350184/2021	EPI_ISL_4172351	2021-08-05	Europe / Estonia / Southern Estonia	Human			Female	21	Symptomatic		Original	Nasopharyngeal swab		AY.122	GK	G142D,S680P,P681R,R158del,F157del,T19R,D950N,E156G,T478K,D614G,L452R)	delta
hCoV-19/Estonia/17350176/2021	EPI_ISL_4172350	2021-08-05	Europe / Estonia / Southern Estonia	Human			Male	26	Symptomatic		Original	Nasopharyngeal swab		AY.122	GK	G142D,S680P,P681R,R158del,F157del,T19R,D950N,E156G,T478K,D614G,L452R)	delta
hCoV-19/Estonia/17851062/2021	EPI_ISL_4172354	2021-08-06	Europe / Estonia / Southern Estonia	Human			Female	44	Symptomatic		Original	Nasopharyngeal swab		AY.100	GK	T95I,G142D,L5F,P681R,R158del,F157del,T19R,D950N,E156G,T478K,D614G,L452R)	delta
hCoV-19/Estonia/17854926/2021	EPI_ISL_4172356	2021-08-06	Europe / Estonia / Southern Estonia	Human			Female	22	Symptomatic		Original	Nasopharyngeal swab		AY.122	GK	C166S,G142D,S680P,P681R,R158del,F157del,T19R,D950N,E156G,T478K,D614G,L452R)	delta
hCoV-19/Estonia/17851067/2021	EPI_ISL_4172355	2021-08-06	Europe / Estonia / Southern Estonia	Human			Male	48	Symptomatic		Original	Nasopharyngeal swab		AY.122	GK	G142D,S680P,P681R,R158del,F157del,T19R,D950N,L938F,E156G,T478K,D614G,L452R)	delta
hCoV-19/Estonia/RC0041722/2021	EPI_ISL_4172381	2021-08-05	Europe / Estonia / Northern Estonia	Human			Male	27	Symptomatic		Original	Nasopharyngeal swab		AY.122	GK	C166S,G142D,S680P,P681R,R158del,F157del,T19R,D950N,E156G,T478K,D614G,L452R)	delta
hCoV-19/Estonia/RC0041743/2021	EPI_ISL_4172382	2021-08-05	Europe / Estonia / Northern Estonia	Human			Male	27	Asymptomatic		Original	Nasopharyngeal swab		AY.122.2	GK	G142D,P681R,R158del,F157del,T19R,D950N,E156G,T478K,A411S,D614G,L452R)	delta
hCoV-19/Estonia/RC0041694/2021	EPI_ISL_4172380	2021-08-05	Europe / Estonia / Northern Estonia	Human			Male	27	Symptomatic		Original	Nasopharyngeal swab		AY.122	GK	C166S,G142D,S680P,P681R,R158del,F157del,T19R,D950N,E156G,T478K,D614G,L452R)	delta
hCoV-19/Estonia/RC0041965/2021	EPI_ISL_4172384	2021-08-05	Europe / Estonia / Southern Estonia	Human			Female	24	Symptomatic		Original	Nasopharyngeal swab		AY.122	GK	G142D,S680P,P681R,R158del,F157del,T19R,D950N,E156G,T478K,D614G,L452R)	delta
hCoV-19/Estonia/RC0043041/2021	EPI_ISL_4172388	2021-08-07	Europe / Estonia / Western Estonia	Human			Male	37	Symptomatic		Original	Nasopharyngeal swab		AY.122	GK	C166S,G142D,S680P,P681R,R158del,F157del,T19R,D950N,E156G,T478K,D614G,L452R)	delta
hCoV-19/Estonia/RC0042659/2021	EPI_ISL_4172386	2021-08-06	Europe / Estonia / Northern Estonia	Human			Male	14	Symptomatic		Original	Nasopharyngeal swab		AY.100	GK	T95I,G142D,L5F,P681R,R158del,F157del,T19R,D950N,E156G,T478K,D614G,L452R,V1122L)	delta
hCoV-19/Estonia/RC0042112/2021	EPI_ISL_4172385	2021-08-06	Europe / Estonia / Northern Estonia	Human			Female	59	Symptomatic		Original	Nasopharyngeal swab		AY.100	GK	T95I,G142D,L5F,P681R,R158del,F157del,T19R,D950N,E156G,T478K,D614G,L452R	delta
hCoV-19/Estonia/RC0041120/2021	EPI_ISL_4172369	2021-08-05	Europe / Estonia / Northern Estonia	Human			Male	10	Symptomatic		Original	Nasopharyngeal swab		AY.9.2	GK	G142D,P681R,R158del,F157del,T19R,A222V,D950N,E156G,T478K,D614G,L452R)	delta
hCoV-19/Estonia/RC0042815/2021	EPI_ISL_4172387	2021-08-07	Europe / Estonia / Northern Estonia	Human			Male	42	Symptomatic		Original	Nasopharyngeal swab		AY.122	GK	C166S,G142D,P681R,R158del,F157del,T19R,D950N,E156G,T478K,A570S,D614G,L452R	delta
hCoV-19/Estonia/RC0041176/2021	EPI_ISL_4172371	2021-08-04	Europe / Estonia	Human			Male	58	Symptomatic		Original	Nasopharyngeal swab		AY.122	GK	G142D,S680P,P681R,R158del,F157del,T19R,D950N,E156G,T478K,D614G,L452R)	delta
hCoV-19/Estonia/RC0041121/2021	EPI_ISL_4172370	2021-08-05	Europe / Estonia / Northern Estonia	Human			Female	34	Symptomatic		Original	Nasopharyngeal swab		AY.122	GK	G142D,S680P,P681R,R158del,F157del,T19R,D950N,E156G,T478K,D614G,L452R)	delta
hCoV-19/Estonia/RC0041266/2021	EPI_ISL_4172373	2021-08-05	Europe / Estonia / Northern Estonia	Human			Female	24	Symptomatic		Original	Nasopharyngeal swab		AY.100	GK	T95I,G142D,L5F,P681R,R158del,F157del,T19R,D950N,E156G,T478K,D614G,L452R,V1122L)	delta
hCoV-19/Estonia/RC0041575/2021	EPI_ISL_4172375	2021-08-05	Europe / Estonia / Northern Estonia	Human			Female	17	Symptomatic		Original	Nasopharyngeal swab		AY.43	GK	G142D,P681R,R158del,F157del,T19R,D950N,E156G,T478K,D614G,L452R)	delta
hCoV-19/Estonia/RC0041614/2021	EPI_ISL_4172376	2021-08-05	Europe / Estonia / Northern Estonia	Human			Male	34	Symptomatic		Original	Nasopharyngeal swab		AY.122	GK	C166S,G142D,S680P,P681R,R158del,F157del,T19R,D950N,E156G,T478K,D614G,L452R)	delta
hCoV-19/Estonia/RC0041652/2021	EPI_ISL_4172377	2021-08-05	Europe / Estonia	Human			Male	49	Symptomatic		Original	Nasopharyngeal swab		AY.122	GK	G142D,S680P,P681R,R158del,F157del,T19R,D950N,E156G,T478K,D614G,L452R)	delta
hCoV-19/Estonia/RC0043321/2021	EPI_ISL_4172391	2021-08-07	Europe / Estonia / Northern Estonia	Human			Female	12	Symptomatic		Original	Nasopharyngeal swab		AY.5	GK	C166S,G142D,P681R,R158del,F157del,T19R,D950N,E156G,T478K,D614G,L452R)	delta
hCoV-19/Estonia/RC0043347/2021	EPI_ISL_4172392	2021-08-07	Europe / Estonia / Northern Estonia	Human			Female	35	Symptomatic		Original	Nasopharyngeal swab		AY.43	GK	C166S,G142D,P681R,R158del,F157del,T19R,D950N,E156G,T478K,D614G,L452R)	delta
hCoV-19/Estonia/RC0043607/2021	EPI_ISL_4172395	2021-08-07	Europe / Estonia / Northern Estonia	Human			Female	9	Symptomatic		Original	Nasopharyngeal swab		AY.122.2	GK	C166S,G142D,P681R,R158del,F157del,T19R,D950N,E156G,T478K,A411S,D614G,L452R)	delta
hCoV-19/Estonia/RC0043693/2021	EPI_ISL_4172397	2021-08-07	Europe / Estonia / Northern Estonia	Human			Female	53	Symptomatic		Original	Nasopharyngeal swab		AY.122	GK	G142D,P681R,R158del,F157del,T19R,D950N,E156G,T478K,D614G,L452R)	delta
hCoV-19/Estonia/RC0043763/2021	EPI_ISL_4172398	2021-08-07	Europe / Estonia	Human			Male	1	Symptomatic		Original	Nasopharyngeal swab		AY.122	GK	C166S,G142D,S680P,P681R,R158del,F157del,T19R,D950N,E156G,T478K,D614G,L452R)	delta
hCoV-19/Estonia/RC0043430/2021	EPI_ISL_4172394	2021-08-07	Europe / Estonia / Northern Estonia	Human			Female	24	Symptomatic		Original	Nasopharyngeal swab		AY.9.2	GK	G142D,P681R,R158del,F157del,T19R,A222V,D950N,E156G,T478K,D614G,L452R)	delta
hCoV-19/Estonia/16581131/2021	EPI_ISL_4171767	2021-07-29	Europe / Estonia / Southern Estonia	Human			Female	2	Symptomatic		Original	Nasopharengeal swab		AY.100	GK	T95I,G142D,L5F,P681R,R158del,F157del,T19R,D950N,E156G,T478K,D614G,L452R	delta
hCoV-19/Estonia/16631836/2021	EPI_ISL_4171770	2021-07-31	Europe / Estonia / Southern Estonia	Human			Male	88	Symptomatic		Original	Nasopharengeal swab		AY.122.2	GK	G142D,P681R,R158del,F157del,T19R,D950N,E156G,T478K,A411S,D614G,L452R)	delta
hCoV-19/Estonia/16581140/2021	EPI_ISL_4171768	2021-07-31	Europe / Estonia / Southern Estonia	Human			Male	12	Symptomatic		Original	Nasopharengeal swab		AY.100	GK	T95I,G142D,L5F,P681R,R158del,F157del,T19R,D950N,E156G,T478K,D614G,L452R)	delta
hCoV-19/Estonia/16631816/2021	EPI_ISL_4171769	2021-07-31	Europe / Estonia / Southern Estonia	Human			Female	25	Symptomatic		Original	Nasopharengeal swab		AY.100	GK	T95I,G142D,L5F,P681R,R158del,F157del,T19R,D950N,E156G,T478K,D614G,L452R)	delta
hCoV-19/Estonia/17096375/2021	EPI_ISL_4171786	2021-07-30	Europe / Estonia / Southern Estonia	Human			Male	18	Symptomatic		Original	Nasopharengeal swab		AY.122	GK	G142D,S680P,P681R,R158del,F157del,T19R,D950N,L938F,E156G,T478K,D614G,L452R)	delta
hCoV-19/Estonia/17123927/2021	EPI_ISL_4171787	2021-07-29	Europe / Estonia / Western Estonia	Human			Female	60	Symptomatic		Original	Nasopharengeal swab		AY.4	GK	T95I,G142D,P681R,R158del,F157del,T19R,D950N,E156G,T478K,D614G,L452R)	delta
hCoV-19/Estonia/17178242/2021	EPI_ISL_4171791	2021-08-01	Europe / Estonia / Western Estonia	Human			Male	17	Symptomatic		Original	Nasopharengeal swab		AY.122	GK	G142D,S680P,P681R,R158del,F157del,T19R,D950N,E156G,T478K,D614G,L452R)	delta
hCoV-19/Estonia/17177670/2021	EPI_ISL_4171788	2021-07-30	Europe / Estonia / Southern Estonia	Human			Male	18	Symptomatic		Original	Nasopharengeal swab		AY.122.2	GK	G142D,P681R,R158del,F157del,T19R,D950N,E156G,T478K,A411S,D614G,L452R)	delta
hCoV-19/Estonia/17178554/2021	EPI_ISL_4171792	2021-08-01	Europe / Estonia / Western Estonia	Human			Male	22	Symptomatic		Original	Nasopharengeal swab		AY.43	GK	G142D,P681R,R158del,F157del,T19R,D950N,E156G,T478K,D614G,L452R	delta
hCoV-19/Estonia/17188742/2021	EPI_ISL_4171795	2021-07-29	Europe / Estonia / Western Estonia	Human			Female	27	Symptomatic		Original	Nasopharengeal swab		AY.122	GK	G142D,S680P,P681R,R158del,F157del,T19R,D950N,E156G,T478K,D614G,L452R)	delta
hCoV-19/Estonia/17178237/2021	EPI_ISL_4171790	2021-08-01	Europe / Estonia / Western Estonia	Human			Male	28	Symptomatic		Original	Nasopharengeal swab		AY.122	GK	G142D,S680P,P681R,R158del,F157del,T19R,D950N,E156G,T478K,D614G,L452R)	delta
hCoV-19/Estonia/17188721/2021	EPI_ISL_4171793	2021-07-29	Europe / Estonia / Northern Estonia	Human			Female	14	Symptomatic		Original	Nasopharengeal swab		AY.100	GK	T95I,G142D,L5F,P681R,R158del,F157del,T19R,D950N,E156G,T478K,D614G,L452R)	delta
hCoV-19/Estonia/17188726/2021	EPI_ISL_4171794	2021-07-29	Europe / Estonia / Western Estonia	Human			Female	63	Asymptomatic		Original	Nasopharengeal swab		AY.100	GK	T95I,G142D,L5F,P681R,R158del,F157del,T19R,D950N,E156G,T478K,D614G,L452R)	delta
hCoV-19/Estonia/16797822/2021	EPI_ISL_4171775	2021-07-31	Europe / Estonia / Southern Estonia	Human			Male	30	Symptomatic		Original	Nasopharengeal swab		AY.122	GK	G142D,S680P,P681R,R158del,F157del,T19R,D950N,L938F,E156G,T478K,D614G,L452R)	delta
hCoV-19/Estonia/16949701/2021	EPI_ISL_4171777	2021-07-30	Europe / Estonia / Southern Estonia	Human			Female	18	Symptomatic		Original	Nasopharengeal swab		AY.122	GK	G142D,P681R,R158del,F157del,T19R,D950N,E156G,T478K,D614G,L452R)	delta
hCoV-19/Estonia/17005198/2021	EPI_ISL_4171779	2021-07-30	Europe / Estonia	Human			Female	65	Symptomatic		Original	Nasopharengeal swab		AY.122.2	GK	G142D,P681R,R158del,F157del,T19R,D950N,E156G,T478K,A411S,D614G,L452R	delta
hCoV-19/Estonia/16797923/2021	EPI_ISL_4171776	2021-07-30	Europe / Estonia / Southern Estonia	Human			Female	22	Symptomatic		Original	Nasopharengeal swab		AY.122	GK	G142D,S680P,P681R,R158del,F157del,T19R,D950N,L938F,E156G,T478K,D614G,L452R)	delta
hCoV-19/Estonia/17080463/2021	EPI_ISL_4171781	2021-07-29	Europe / Estonia / Western Estonia	Human			Female	50	Symptomatic		Original	Nasopharengeal swab		AY.46.5	GK	G142D,P681R,R158del,F157del,T19R,D950N,E156G,T478K,D614G,L452R	delta
hCoV-19/Estonia/17005223/2021	EPI_ISL_4171780	2021-07-28	Europe / Estonia	Human			Male	3	Symptomatic		Original	Nasopharengeal swab		AY.122	GK	G142D,P681R,R158del,F157del,T19R,D950N,E156G,T478K,D614G,L452R)	delta
hCoV-19/Estonia/17096359/2021	EPI_ISL_4171785	2021-07-30	Europe / Estonia / Northern Estonia	Human			Male	19	Symptomatic		Original	Nasopharengeal swab		AY.100	GK	T95I,G142D,L5F,P681R,R158del,F157del,T19R,D950N,E156G,T478K,D614G,L452R)	delta
hCoV-19/Estonia/17096354/2021	EPI_ISL_4171784	2021-07-30	Europe / Estonia / Southern Estonia	Human			Female	27	Symptomatic		Original	Nasopharengeal swab		AY.122	GK	G142D,S680P,P681R,R158del,F157del,T19R,D950N,L938F,E156G,T478K,D614G,L452R)	delta
hCoV-19/Estonia/17188774/2021	EPI_ISL_4171799	2021-07-31	Europe / Estonia / Western Estonia	Human			Female	22	Symptomatic		Original	Nasopharengeal swab		AY.100	GK	T95I,G142D,L5F,P681R,R158del,F157del,T19R,D950N,E156G,T478K,D614G,L452R	delta
hCoV-19/Estonia/17080483/2021	EPI_ISL_4171782	2021-07-31	Europe / Estonia / Western Estonia	Human			Female	17	Symptomatic		Original	Nasopharengeal swab		AY.100	GK	T95I,G142D,P681R,R158del,F157del,T19R,D950N,E156G,T478K,D614G,L452R	delta
hCoV-19/Estonia/17188770/2021	EPI_ISL_4171798	2021-07-31	Europe / Estonia / Western Estonia	Human			Male	32	Symptomatic		Original	Nasopharengeal swab		AY.100	GK	T95I,G142D,L5F,P681R,R158del,F157del,T19R,D950N,E156G,T478K,D614G,L452R	delta
hCoV-19/Italy/FVG-PN-64030549/2021	EPI_ISL_4188814	2021-08-24	Europe / Italy / Friuli Venezia Giulia	Human		Contact tracing	Male	25	Asymptomatic	Not vaccinated	Original	Oropharyngeal swab		AY.42	GK	T95I,P681R,R158del,F157del,T19R,D950N,T719I,E156G,T478K,D614G,L452R	delta
hCoV-19/Italy/FVG-GO-64030464/2021	EPI_ISL_4188747	2021-08-24	Europe / Italy / Friuli Venezia Giulia	Human		Contact tracing	Female	72	Asymptomatic	Not vaccinated	Original	Oropharyngeal swab		AY.43	GK	G142D,P681R,R158del,F157del,T19R,D950N,E156G,T478K,D614G,L452R	delta
hCoV-19/Estonia/RC0035371/2021	EPI_ISL_4106516	2021-07-27	Europe / Estonia / Northern Estonia	Human			Female	24	Symptomatic		Original	Nasopharengeal swab		AY.122	GK	G142D,S680P,P681R,R158del,F157del,T19R,D950N,E156G,T478K,D614G,L452R)	delta
hCoV-19/Estonia/RC0034932/2021	EPI_ISL_4106507	2021-07-27	Europe / Estonia / Northern Estonia	Human			Male	66	Symptomatic		Original	Nasopharengeal swab		AY.122	GK	G142D,P681R,R158del,F157del,T19R,D950N,E156G,T478K,D614G,L452R)	delta
hCoV-19/Estonia/16796257/2021	EPI_ISL_4106529	2021-07-22	Europe / Estonia / Northern Estonia	Human			Female	31	Symptomatic		Original	Nasopharengeal swab		AY.100	GK	T95I,G142D,L5F,P681R,R158del,F157del,T19R,D950N,E156G,T478K,D614G,L452R)	delta
hCoV-19/Estonia/17080491/2021	EPI_ISL_4106534	2021-07-24	Europe / Estonia / Western Estonia	Human			Male	51	Symptomatic		Original	Nasopharengeal swab		AY.122	GK	G142D,P681R,R158del,F157del,T19R,D950N,E156G,T478K,D614G,L452R)	delta
hCoV-19/Estonia/RC0033639/2021	EPI_ISL_4106605	2021-07-24	Europe / Estonia / Northern Estonia	Human			Female	19	Symptomatic		Original	Nasopharengeal swab		AY.122	GK	G142D,S680P,P681R,R158del,F157del,T19R,D950N,E156G,T478K,D614G,L452R)	delta
hCoV-19/Estonia/RC0031938/2021	EPI_ISL_4106584	2021-07-21	Europe / Estonia / Northern Estonia	Human			Male	25	Symptomatic		Original	Nasopharengeal swab		AY.7.1	GK	G142D,P681R,R158del,F157del,T19R,D950N,E156G,T478K,D614G,L452R)	delta
hCoV-19/Estonia/17346188/2021	EPI_ISL_4106473	2021-07-27	Europe / Estonia / Southern Estonia	Human			Female	27	Symptomatic		Original	Nasopharengeal swab		AY.122	GK	G142D,S680P,P681R,R158del,F157del,T19R,D950N,E156G,T478K,D614G,L452R)	delta
hCoV-19/Estonia/17177638/2021	EPI_ISL_4106459	2021-07-27	Europe / Estonia / Southern Estonia	Human			Female	34	Symptomatic		Original	Nasopharengeal swab		AY.122	GK	G142D,S680P,P681R,R158del,F157del,T19R,D950N,L938F,E156G,T478K,D614G,L452R)	delta
hCoV-19/Estonia/RC0035169/2021	EPI_ISL_4106512	2021-07-27	Europe / Estonia / Northern Estonia	Human			Male	21	Symptomatic		Original	Nasopharengeal swab		AY.122	GK	G142D,S680P,P681R,R158del,F157del,T19R,D950N,E156G,T478K,D614G,L452R)	delta
hCoV-19/Estonia/RC0033660/2021	EPI_ISL_4106606	2021-07-24	Europe / Estonia / Northern Estonia	Human			Female	20	Symptomatic		Original	Nasopharengeal swab		AY.124	GK	T95I,G142D,P681R,R158del,F157del,T19R,D950N,E156G,T478K,D614G,L452R)	delta
hCoV-19/Estonia/RC0033447/2021	EPI_ISL_4106600	2021-07-24	Europe / Estonia	Human			Female	24	Symptomatic		Original	Nasopharengeal swab		AY.122	GK	G142D,S680P,P681R,R158del,F157del,T19R,D950N,E156G,T478K,D614G,L452R)	delta
hCoV-19/Estonia/16799212/2021	EPI_ISL_4172323	2021-08-05	Europe / Estonia	Human			Male	45	Symptomatic		Original	Nasopharyngeal swab		AY.122	GK	C166S,G142D,S680P,P681R,R158del,F157del,T19R,D950N,E156G,T478K,D614G,L452R)	delta
hCoV-19/Estonia/17188920/2021	EPI_ISL_4172347	2021-08-04	Europe / Estonia / Western Estonia	Human			Female	26	Symptomatic		Original	Nasopharyngeal swab		AY.122	GK	G142D,S680P,P681R,R158del,F157del,T19R,D950N,E156G,T478K,D614G,L452R)	delta
hCoV-19/Estonia/17177719/2021	EPI_ISL_4172343	2021-08-05	Europe / Estonia / Northern Estonia	Human			Female	15	Symptomatic		Original	Nasopharyngeal swab		AY.122	GK	C166S,L455F,G142D,S680P,P681R,R158del,F157del,T19R,D950N,E156G,T478K,D614G,L452R)	delta
hCoV-19/Estonia/16797804/2021	EPI_ISL_4171774	2021-07-31	Europe / Estonia / Southern Estonia	Human			Male	25	Symptomatic		Original	Nasopharengeal swab		AY.122	GK	G142D,S680P,P681R,R158del,F157del,T19R,D950N,L938F,E156G,T478K,D614G,L452R)	delta
hCoV-19/Estonia/RC0041819/2021	EPI_ISL_4172383	2021-08-05	Europe / Estonia / Northern Estonia	Human			Male	32	Symptomatic		Original	Nasopharyngeal swab		AY.9.2	GK	G142D,P681R,R158del,F157del,T19R,A222V,D950N,E156G,T478K,D614G,L452R)	delta
hCoV-19/Estonia/RC0038680/2021	EPI_ISL_4171893	2021-08-01	Europe / Estonia / Northern Estonia	Human			Male	33	Symptomatic		Original	Nasopharengeal swab		AY.100	GK	T95I,G142D,L5F,P681R,R158del,F157del,T19R,D950N,E156G,T478K,D614G,L452R)	delta
hCoV-19/Estonia/17330049/2021	EPI_ISL_4171886	2021-08-03	Europe / Estonia / Southern Estonia	Human			Female	19	Symptomatic		Original	Nasopharengeal swab		AY.122	GK	G142D,P681R,R158del,F157del,T19R,D950N,E156G,T478K,D614G,L452R	delta
hCoV-19/Estonia/17152469/2021	EPI_ISL_4172421	2021-08-10	Europe / Estonia / Western Estonia	Human			Male	0	Symptomatic		Original	Nasopharyngeal swab		AY.122	GK	C166S,G142D,S680P,P681R,R158del,F157del,T19R,D950N,E156G,T478K,D614G,L452R)	delta
hCoV-19/Estonia/16949808/2021	EPI_ISL_4172415	2021-08-11	Europe / Estonia / Western Estonia	Human			Female	62	Symptomatic		Original	Nasopharyngeal swab		AY.122	GK	C166S,G142D,P681R,R158del,F157del,T19R,D950N,E156G,T478K,D614G,L452R)	delta
hCoV-19/Estonia/RC0045154/2021	EPI_ISL_4172480	2021-08-09	Europe / Estonia / Northern Estonia	Human			Female	35	Symptomatic		Original	Nasopharyngeal swab		AY.122.2	GK	G142D,P681R,R158del,F157del,T19R,D950N,E156G,T478K,A411S,D614G,L452R)	delta
hCoV-19/Estonia/17854860/2021	EPI_ISL_4172437	2021-08-09	Europe / Estonia / Southern Estonia	Human			Male	23	Symptomatic		Original	Nasopharyngeal swab		AY.122.2	GK	G142D,P681R,R158del,F157del,T19R,D950N,E156G,T478K,A411S,D614G,L452R)	delta
hCoV-19/Estonia/17177581/2021	EPI_ISL_4106458	2021-07-26	Europe / Estonia / Southern Estonia	Human			Male	18	Symptomatic		Original	Nasopharengeal swab		AY.100	GK	T95I,G142D,L5F,P681R,R158del,F157del,T19R,D950N,E156G,T478K,D614G,L452R)	delta
hCoV-19/Estonia/RC0034901/2021	EPI_ISL_4106506	2021-07-27	Europe / Estonia / Northern Estonia	Human			Male	42	Symptomatic		Original	Nasopharengeal swab		B.1.617.2	GK	G142D,P681R,R158del,F157del,T19R,D950N,E156G,T478K,D614G,L452R)	delta
hCoV-19/Estonia/17080532/2021	EPI_ISL_4106446	2021-07-27	Europe / Estonia / Western Estonia	Human			Female	22	Symptomatic		Original	Nasopharengeal swab		AY.100	GK	T95I,G142D,L5F,P681R,R158del,F157del,T19R,D950N,E156G,T478K,D614G,L452R)	delta
hCoV-19/Estonia/RC0045192/2021	EPI_ISL_4172483	2021-08-09	Europe / Estonia / Northern Estonia	Human			Female	64	Symptomatic		Original	Nasopharyngeal swab		AY.122	GK	G142D,S680P,P681R,R158del,F157del,T19R,D950N,E156G,T478K,D614G,L452R)	delta
hCoV-19/Estonia/16721644/2021	EPI_ISL_4171854	2021-08-01	Europe / Estonia / Western Estonia	Human			Male	30	Symptomatic		Original	Nasopharengeal swab		AY.122	GK	G142D,S680P,P681R,R158del,F157del,T19R,D950N,L938F,E156G,T478K,D614G,L452R)	delta
hCoV-19/Estonia/RC0035698/2021	EPI_ISL_4171814	2021-07-28	Europe / Estonia / Northern Estonia	Human			Male	27	Symptomatic		Original	Nasopharengeal swab		AY.122	GK	G142D,S680P,P681R,R158del,F157del,T19R,D950N,E156G,T478K,D614G,L452R)	delta
hCoV-19/Estonia/16771197/2021	EPI_ISL_4171861	2021-08-02	Europe / Estonia / Northern Estonia	Human			Female	15	Symptomatic		Original	Nasopharengeal swab		AY.100	GK	T95I,G142D,L5F,P681R,R158del,F157del,T19R,D950N,E156G,T478K,D614G,L452R)	delta
hCoV-19/Estonia/16771072/2021	EPI_ISL_4171860	2021-08-01	Europe / Estonia / Northern Estonia	Human			Female	0	Symptomatic		Original	Nasopharengeal swab		AY.122.2	GK	G142D,P681R,R158del,F157del,T19R,D950N,E156G,T478K,A411S,D614G,L452R)	delta
hCoV-19/Estonia/RC0038481/2021	EPI_ISL_4171984	2021-08-01	Europe / Estonia / Northern Estonia	Human			Male	28	Symptomatic		Original	Nasopharengeal swab		AY.122	GK	G142D,P681R,R158del,F157del,T19R,D950N,E156G,T478K,D614G,L452R)	delta
hCoV-19/Estonia/RC0039018/2021	EPI_ISL_4171896	2021-08-02	Europe / Estonia / Northern Estonia	Human			Male	18	Symptomatic		Original	Nasopharengeal swab		AY.43	GK	G142D,P681R,R158del,F157del,T19R,D950N,E156G,T478K,D614G,L452R	delta
hCoV-19/Estonia/RC0045315/2021	EPI_ISL_4172488	2021-08-09	Europe / Estonia / Northern Estonia	Human			Female	47	Symptomatic		Original	Nasopharyngeal swab		AY.122	GK	C166S,G142D,S680P,P681R,R158del,F157del,T19R,D950N,E156G,T478K,D614G,L452R)	delta
hCoV-19/Estonia/RC0046322/2021	EPI_ISL_4172501	2021-08-10	Europe / Estonia / Western Estonia	Human			Male	33	Symptomatic		Original	Nasopharyngeal swab		AY.122.2	GK	C166S,G142D,P681R,R158del,F157del,T19R,D950N,E156G,T478K,A411S,D614G,L452R)	delta
hCoV-19/Estonia/RC0047128/2021	EPI_ISL_4172514	2021-08-11	Europe / Estonia	Human			Female	14	Symptomatic		Original	Nasopharyngeal swab		AY.122	GK	G142D,P681R,R158del,F157del,T19R,D950N,E156G,T478K,D614G,L452R)	delta
hCoV-19/Estonia/RC0046568/2021	EPI_ISL_4172504	2021-08-11	Europe / Estonia / Northern Estonia	Human			Female	44	Symptomatic		Original	Nasopharyngeal swab		AY.122	GK	G142D,P681R,R158del,F157del,T19R,D950N,E156G,T478K,D614G,L452R)	delta
hCoV-19/Estonia/17188834/2021	EPI_ISL_4106464	2021-07-28	Europe / Estonia / Western Estonia	Human			Female	21	Symptomatic		Original	Nasopharengeal swab		AY.122	GK	G142D,S680P,P681R,R158del,F157del,T19R,D950N,E156G,T478K,D614G,L452R)	delta
hCoV-19/Estonia/16760956/2021	EPI_ISL_4106432	2021-07-27	Europe / Estonia	Human			Female	30	Symptomatic		Original	Nasopharengeal swab		AY.122	GK	G142D,S680P,P681R,R158del,F157del,T19R,D950N,E156G,T478K,D614G,L452R)	delta
hCoV-19/Estonia/16800283/2021	EPI_ISL_4106441	2021-07-27	Europe / Estonia	Human			Male	19	Asymptomatic		Original	Nasopharengeal swab		AY.122	GK	G142D,P681R,R158del,F157del,T19R,D950N,E156G,T478K,D614G,L452R)	delta
hCoV-19/Estonia/17123611/2021	EPI_ISL_4106450	2021-07-28	Europe / Estonia / Northern Estonia	Human			Male	19	Symptomatic		Original	Nasopharengeal swab		AY.122	GK	G142D,S680P,P681R,R158del,F157del,T19R,D950N,E156G,T478K,D614G,L452R)	delta
hCoV-19/Estonia/17123686/2021	EPI_ISL_4106454	2021-07-27	Europe / Estonia / Western Estonia	Human			Female	49	Symptomatic		Original	Nasopharengeal swab		AY.100	GK	T95I,G142D,L5F,P681R,R158del,F157del,T19R,D950N,E156G,T478K,D614G,L452R)	delta
hCoV-19/Estonia/17123429/2021	EPI_ISL_4106537	2021-07-24	Europe / Estonia / Western Estonia	Human			Male	20	Symptomatic		Original	Nasopharengeal swab		AY.100	GK	T95I,G142D,L5F,P681R,R158del,F157del,T19R,D950N,E156G,T478K,D614G,L452R)	delta
hCoV-19/Estonia/16581098/2021	EPI_ISL_4106526	2021-07-24	Europe / Estonia / Southern Estonia	Human			Female	19	Symptomatic		Original	Nasopharengeal swab		AY.122.2	GK	G142D,P681R,R158del,F157del,T19R,D950N,E156G,T478K,A411S,D614G,L452R)	delta
hCoV-19/Estonia/17123803/2021	EPI_ISL_4106547	2021-07-22	Europe / Estonia / Western Estonia	Human			Male	34	Symptomatic		Original	Nasopharengeal swab		AY.100	GK	T95I,G142D,L5F,P681R,R158del,F157del,T19R,D950N,E156G,T478K,D614G,L452R)	delta
hCoV-19/Estonia/17330495/2021	EPI_ISL_4106567	2021-07-21	Europe / Estonia / Western Estonia	Human			Male	25	Symptomatic		Original	Nasopharengeal swab		AY.122.2	GK	G142D,P681R,R158del,F157del,T19R,D950N,E156G,T478K,A411S,D614G,L452R)	delta
hCoV-19/Estonia/RC0032024/2021	EPI_ISL_4106586	2021-07-21	Europe / Estonia / Northern Estonia	Human			Male	16	Symptomatic		Original	Nasopharengeal swab		AY.100	GK	T95I,G142D,L5F,P681R,R158del,F157del,T19R,D950N,E156G,T478K,D614G,L452R)	delta
hCoV-19/Estonia/16581119/2021	EPI_ISL_4171766	2021-07-29	Europe / Estonia / Southern Estonia	Human			Female	55	Symptomatic		Original	Nasopharengeal swab		AY.100	GK	T95I,G142D,L5F,P681R,R158del,F157del,T19R,D950N,E156G,T478K,D614G,L452R)	delta
hCoV-19/Estonia/17188780/2021	EPI_ISL_4171800	2021-07-31	Europe / Estonia / Western Estonia	Human			Female	20	Symptomatic		Original	Nasopharengeal swab		AY.122	GK	G142D,S680P,P681R,R158del,F157del,T19R,D950N,E156G,T478K,D614G,L452R)	delta
hCoV-19/Estonia/16631837/2021	EPI_ISL_4171771	2021-07-31	Europe / Estonia / Southern Estonia	Human			Female	19	Symptomatic		Original	Nasopharengeal swab		AY.122.2	GK	G142D,P681R,R158del,F157del,T19R,D950N,E156G,T478K,A411S,D614G,L452R	delta
hCoV-19/Estonia/17362932/2021	EPI_ISL_4171811	2021-07-30	Europe / Estonia	Human			Male	13	Symptomatic		Original	Nasopharengeal swab		AY.122	GK	G142D,P681R,R158del,F157del,T19R,D950N,E156G,T478K,D614G,L452R)	delta
hCoV-19/Estonia/17330620/2021	EPI_ISL_4171808	2021-07-28	Europe / Estonia / Southern Estonia	Human			Male	37	Symptomatic		Original	Nasopharengeal swab		AY.122.2	GK	G142D,P681R,R158del,F157del,T19R,D950N,E156G,T478K,A411S,D614G,L452R)	delta
hCoV-19/Estonia/RC0036221/2021	EPI_ISL_4171821	2021-07-28	Europe / Estonia / Northern Estonia	Human			Female	13	Symptomatic		Original	Nasopharengeal swab		AY.100	GK	T95I,G142D,L5F,P681R,R158del,F157del,T19R,D950N,E156G,T478K,D614G,L452R)	delta
hCoV-19/Estonia/RC0035735/2021	EPI_ISL_4171815	2021-07-28	Europe / Estonia / Northern Estonia	Human			Male	38	Symptomatic		Original	Nasopharengeal swab		AY.100	GK	T95I,G142D,L5F,P681R,R158del,F157del,T19R,D950N,E156G,T478K,D614G,L452R)	delta
hCoV-19/Estonia/RC0036282/2021	EPI_ISL_4171824	2021-07-28	Europe / Estonia / Northern Estonia	Human			Female	51	Symptomatic		Original	Nasopharengeal swab		AY.122	GK	G142D,P681R,R158del,F157del,T19R,D950N,E156G,T478K,D614G,L452R	delta
hCoV-19/Estonia/RC0036358/2021	EPI_ISL_4171825	2021-07-28	Europe / Estonia	Human			Female	44	Symptomatic		Original	Nasopharengeal swab		AY.122	GK	G142D,S680P,P681R,R158del,F157del,T19R,D950N,E156G,T478K,D614G,L452R	delta
hCoV-19/Estonia/16918592/2021	EPI_ISL_4171870	2021-08-03	Europe / Estonia / Southern Estonia	Human			Male	38	Symptomatic		Original	Nasopharengeal swab		AY.122	GK	G142D,P681R,R158del,F157del,T19R,D950N,E156G,T478K,G1171V,D614G,V1104L,L452R)	delta
hCoV-19/Estonia/15913995/2021	EPI_ISL_4171851	2021-08-03	Europe / Estonia / Southern Estonia	Human			Male	7	Symptomatic		Original	Nasopharengeal swab		AY.122.2	GK	G142D,P681R,R158del,F157del,T19R,D950N,E156G,T478K,A411S,D614G,L452R)	delta
hCoV-19/Estonia/16918610/2021	EPI_ISL_4172327	2021-08-05	Europe / Estonia / Southern Estonia	Human			Male	19	Symptomatic		Original	Nasopharyngeal swab		AY.122	GK	C166S,G142D,S680P,P681R,R158del,F157del,T19R,D950N,E156G,T478K,D614G,L452R)	delta
hCoV-19/Estonia/RC0043626/2021	EPI_ISL_4172396	2021-08-07	Europe / Estonia / Northern Estonia	Human			Male	36	Symptomatic		Original	Nasopharyngeal swab		AY.122.2	GK	C166S,G142D,P681R,R158del,F157del,T19R,D950N,E156G,T478K,A411S,D614G,L452R)	delta
hCoV-19/Estonia/17318746/2021	EPI_ISL_4172426	2021-08-10	Europe / Estonia	Human			Female	21	Symptomatic		Original	Nasopharyngeal swab		AY.4.5	GK	T95I,G142D,P681R,D1259Y,R158del,F157del,T19R,D950N,E156G,T478K,D614G,L452R)	delta
hCoV-19/Estonia/16918621/2021	EPI_ISL_4172412	2021-08-10	Europe / Estonia / Southern Estonia	Human			Female	31	Symptomatic		Original	Nasopharyngeal swab		AY.122	GK	G142D,S680P,P681R,R158del,F157del,T19R,D950N,E156G,T478K,D614G,L452R)	delta
hCoV-19/Estonia/17896676/2021	EPI_ISL_4172439	2021-08-11	Europe / Estonia / Southern Estonia	Human			Male	10	Symptomatic		Original	Nasopharyngeal swab		AY.122.2	GK	C166S,G142D,P681R,R158del,F157del,T19R,D950N,E156G,T478K,D614G,L452R)	delta
hCoV-19/Estonia/RC0061375/2021	EPI_ISL_4503525	2021-08-26	Europe / Estonia	Human			Female	31	Symptomatic		Original	Nasopharengeal swab		AY.122	GK	G142D,S680P,P681R,R158del,F157del,T19R,D950N,E156G,T478K,D614G,L452R)	delta
hCoV-19/USA/LA-EVTL4967/2021	EPI_ISL_4254049	2021-08-17	North America / USA / Louisiana / Lincoln Parish	Human		Baseline surveillance	Female	19	Symptomatic	Not vaccinated	Original	Midturbinate swab		AY.25.1	GK	G142D,P681R,R158del,F157del,T19R,D950N,E156G,T478K,D614G,L452R	delta
hCoV-19/Estonia/RC0059779/2021	EPI_ISL_4255445	2021-08-24	Europe / Estonia / Northern Estonia	Human			Female	39	Symptomatic		Original	Nasopharyngeal swab		AY.122	GK	G142D,S680P,P681R,R158del,F157del,T19R,D950N,E156G,T478K,D614G,L452R)	delta
hCoV-19/Estonia/17853227/2021	EPI_ISL_4255489	2021-08-15	Europe / Estonia / Southern Estonia	Human			Female	31	Symptomatic		Original	Nasopharyngeal swab		AY.122	GK	G142D,S680P,P681R,R158del,F157del,T19R,D950N,E156G,T478K,D614G,L452R)	delta
hCoV-19/Estonia/RC0051620/2021	EPI_ISL_4255503	2021-08-15	Europe / Estonia / Western Estonia	Human			Male	30	Symptomatic		Original	Nasopharyngeal swab		AY.122	GK	G142D,S680P,P681R,R158del,F157del,T19R,D950N,E156G,T478K,D614G,L452R)	delta
hCoV-19/Estonia/RC0054103/2021	EPI_ISL_4255323	2021-08-18	Europe / Estonia / Western Estonia	Human			Female	30	Symptomatic		Original	Nasopharyngeal swab		AY.122	GK	G142D,S680P,P681R,R158del,F157del,T19R,D950N,E156G,T478K,D614G,L452R)	delta
hCoV-19/Estonia/17852146/2021	EPI_ISL_4255485	2021-08-15	Europe / Estonia / Southern Estonia	Human			Male	41	Symptomatic		Original	Nasopharyngeal swab		AY.122	GK	C166S,G142D,S680P,P681R,R158del,F157del,T19R,D950N,E156G,T478K,D614G,L452R)	delta
hCoV-19/Estonia/17897748/2021	EPI_ISL_4255495	2021-08-17	Europe / Estonia / Western Estonia	Human			Male	7	Symptomatic		Original	Nasopharyngeal swab		AY.122	GK	C166S,G142D,S680P,P681R,R158del,F157del,T19R,D950N,E156G,T478K,D614G,L452R)	delta
hCoV-19/USA/LA-EVTL4699/2021	EPI_ISL_4214259	2021-08-19	North America / USA / Louisiana / Lincoln Parish	Human		Baseline surveillance	Female	19	Symptomatic	Not vaccinated but previously infected (Reinfection)	Original	Midturbinate swab		AY.3	GK	G142D,P681R,R158del,F157del,T19R,D950N,E156G,T478K,D614G,L452R	delta
hCoV-19/USA/LA-EVTL4846/2021	EPI_ISL_4214867	2021-08-26	North America / USA / Louisiana / Lincoln Parish	Human		Baseline surveillance	Female	19	Symptomatic	Fully Vaccinated, Pfizer/BioNTech, 2nd dose in April 2021	Original; re-sequenced and submitted as EPI_ISL_4300704	Midturbinate swab		AY.3.1	GK	G142D,P681R,R158del,F157del,T19R,D950N,E156G,T478K,D614G,L452R)	delta
hCoV-19/USA/LA-EVTL4848/2021	EPI_ISL_4214876	2021-08-25	North America / USA / Louisiana / Lincoln Parish	Human		Baseline surveillance	Male	21	Symptomatic	Partially vaccinated and previously infected, Pfizer/BioNTech, 1st dose in August 2021	Original; re-sequenced and submitted as EPI_ISL_4300705	Midturbinate swab		AY.3.1	GK	G142D,P681R,R158del,F157del,T19R,D950N,E156G,T478K,D614G,L452R)	delta
hCoV-19/USA/LA-EVTL4851/2021	EPI_ISL_4214890	2021-08-26	North America / USA / Louisiana / Lincoln Parish	Human		Baseline surveillance	Male	20	Asymptomatic	Not vaccinated	Original; re-sequenced and submitted as EPI_ISL_4300708	Midturbinate swab		AY.3	GK	G142D,P681R,R158del,F157del,T19R,D950N,E156G,T478K,D614G,L452R	delta
hCoV-19/USA/LA-EVTL4779/2021	EPI_ISL_4214582	2021-08-24	North America / USA / Louisiana / Lincoln Parish	Human		Baseline surveillance	Male	19	Asymptomatic	Not vaccinated	Original	Midturbinate swab		AY.3.1	GK	G142D,P681R,R158del,F157del,T19R,D950N,E156G,T478K,D614G,L452R)	delta
hCoV-19/USA/LA-EVTL4773/2021	EPI_ISL_4214557	2021-08-23	North America / USA / Louisiana / Lincoln Parish	Human		Baseline surveillance	Male	18	Symptomatic	Partially vaccinated, Pfizer/BioNTech, Date Unknown	Original; re-sequenced and submitted as EPI_ISL_4279143	Midturbinate swab		AY.3	GK	G142D,P681R,R158del,F157del,T19R,D950N,E156G,T478K,D614G,L452R	delta
hCoV-19/USA/LA-EVTL4777/2021	EPI_ISL_4214573	2021-08-24	North America / USA / Louisiana / Lincoln Parish	Human		Baseline surveillance	Male	19	Symptomatic	Not vaccinated	Original; re-sequenced and submitted as EPI_ISL_4279155	Midturbinate swab		AY.3.1	GK	G142D,P681R,R158del,F157del,T19R,D950N,E156G,T478K,D614G,L452R)	delta
hCoV-19/USA/LA-EVTL4785/2021	EPI_ISL_4214608	2021-08-24	North America / USA / Louisiana / Lincoln Parish	Human		Baseline surveillance	Male	36	Symptomatic	Not vaccinated	Original	Midturbinate swab		AY.113	GK	T95I,G142D,P681R,R158del,F157del,T19R,D950N,E156G,T478K,D614G,L452R)	delta
hCoV-19/USA/LA-EVTL4856/2021	EPI_ISL_4214913	2021-08-27	North America / USA / Louisiana / Lincoln Parish	Human		Baseline surveillance	Male	43	Symptomatic	Not vaccinated	Original	Midturbinate swab		AY.3	GK	G142D,P681R,R158del,F157del,T19R,D950N,E156G,T478K,D614G,L452R)	delta
hCoV-19/USA/LA-EVTL4847/2021	EPI_ISL_4214872	2021-08-25	North America / USA / Louisiana / Lincoln Parish	Human		Baseline surveillance	Male	20	Symptomatic	Not vaccinated	Original; re-sequenced and submitted as EPI_ISL_4300706	Midturbinate swab		AY.3.1	GK	G142D,P681R,R158del,F157del,T19R,D950N,E156G,T478K,D614G,L452R	delta
hCoV-19/USA/LA-EVTL4850/2021	EPI_ISL_4214886	2021-08-26	North America / USA / Louisiana / Lincoln Parish	Human		Baseline surveillance	Male	23	Symptomatic	Not vaccinated	Original; re-sequenced and submitted as EPI_ISL_4300703	Midturbinate swab		AY.3.1	GK	G142D,P681R,R158del,F157del,T19R,D950N,E156G,T478K,D614G,L452R)	delta
hCoV-19/USA/LA-EVTL4849/2021	EPI_ISL_4214881	2021-08-26	North America / USA / Louisiana / Lincoln Parish	Human		Baseline surveillance	Male	19	Symptomatic	Not vaccinated	Original; re-sequenced and submitted as EPI_ISL_4300702	Midturbinate swab		AY.3.1	GK	G142D,P681R,R158del,F157del,T19R,D950N,E156G,T478K,D614G,L452R	delta
hCoV-19/USA/LA-EVTL4775/2021	EPI_ISL_4214565	2021-08-23	North America / USA / Louisiana / Lincoln Parish	Human		Baseline surveillance	Female	21	Symptomatic	Partially vaccinated, Pfizer/BioNTech, Date Unknown	Original; re-sequenced and submitted as EPI_ISL_4279149	Midturbinate swab		AY.3.1	GK	G142D,P681R,R158del,F157del,T19R,D950N,E156G,T478K,D614G,L452R)	delta
hCoV-19/USA/LA-EVTL4754/2021	EPI_ISL_4214476	2021-08-23	North America / USA / Louisiana / Lincoln Parish	Human		Baseline surveillance	Male	18	Symptomatic	Partially vaccinated, Pfizer/BioNTech, 1st dose in August 2021	Original	Midturbinate swab		AY.3.1	GK	G142D,P681R,R158del,F157del,T19R,D950N,E156G,T478K,D614G,L452R)	delta
hCoV-19/Estonia/RC0051708/2021	EPI_ISL_4255506	2021-08-15	Europe / Estonia / Northern Estonia	Human			Female	55	Symptomatic		Original	Nasopharyngeal swab		AY.122	GK	G142D,P681R,R158del,F157del,T19R,D950N,E156G,T478K,D614G,L452R)	delta
hCoV-19/Estonia/RC0051669/2021	EPI_ISL_4255505	2021-08-16	Europe / Estonia / Northern Estonia	Human			Male	45	Symptomatic		Original	Nasopharyngeal swab		AY.122.2	GK	G142D,P681R,R158del,F157del,T19R,D950N,E156G,T478K,A411S,D614G,L452R)	delta
hCoV-19/Estonia/RC0051451/2021	EPI_ISL_4255501	2021-08-15	Europe / Estonia / Northern Estonia	Human			Female	17	Symptomatic		Original	Nasopharyngeal swab		AY.100	GK	T95I,G142D,L5F,P681R,R158del,F157del,A684S,T19R,D950N,E156G,T478K,D614G,L452R)	delta
hCoV-19/Estonia/RC0051655/2021	EPI_ISL_4255504	2021-08-15	Europe / Estonia / Northern Estonia	Human			Female	19	Symptomatic		Original	Nasopharyngeal swab		B.1.617.2	GK	G142D,K77T,P681R,R158del,F157del,T19R,D950N,E156G,T478K,D614G,L452R)	delta
hCoV-19/Estonia/RC0051543/2021	EPI_ISL_4255502	2021-08-15	Europe / Estonia	Human			Male	38	Symptomatic		Original	Nasopharyngeal swab		AY.122.2	GK	C166S,G142D,P681R,R158del,F157del,T19R,D950N,E156G,T478K,A411S,D614G,L452R)	delta
hCoV-19/Estonia/RC0052760/2021	EPI_ISL_4255526	2021-08-17	Europe / Estonia	Human			Male	16	Symptomatic		Original	Nasopharyngeal swab		AY.122	GK	C166S,G142D,S680P,P681R,R158del,F157del,T19R,D950N,E156G,T478K,D614G,L452R)	delta
hCoV-19/Estonia/RC0052857/2021	EPI_ISL_4255528	2021-08-17	Europe / Estonia	Human			Female	35	Symptomatic		Original	Nasopharyngeal swab		AY.100	GK	T95I,G142D,L5F,P681R,R158del,F157del,T19R,D950N,E156G,T478K,D614G,L452R	delta
hCoV-19/Estonia/RC0052793/2021	EPI_ISL_4255527	2021-08-17	Europe / Estonia	Human			Female	58	Symptomatic		Original	Nasopharyngeal swab		AY.122	GK	G142D,S680P,P681R,R158del,F157del,T19R,D950N,E156G,T478K,D614G,L452R)	delta
hCoV-19/Estonia/RC0052609/2021	EPI_ISL_4255522	2021-08-16	Europe / Estonia / Northern Estonia	Human			Male	51	Symptomatic		Original	Nasopharyngeal swab		AY.122	GK	G142D,S680P,P681R,R158del,F157del,T19R,D950N,E156G,T478K,D614G,L452R)	delta
hCoV-19/Estonia/RC0052535/2021	EPI_ISL_4255521	2021-08-17	Europe / Estonia / Northern Estonia	Human			Female	7	Symptomatic		Original	Nasopharyngeal swab		AY.122	GK	G142D,S680P,P681R,R158del,F157del,S1147L,T19R,D950N,L938F,E156G,T478K,D614G,L452R)	delta
hCoV-19/Estonia/RC0052693/2021	EPI_ISL_4255524	2021-08-17	Europe / Estonia	Human			Female	29	Symptomatic		Original	Nasopharyngeal swab		AY.5	GK	G142D,P681R,R158del,F157del,T19R,V70F,D950N,E156G,T478K,D614G,L452R)	delta
hCoV-19/Estonia/RC0052652/2021	EPI_ISL_4255523	2021-08-16	Europe / Estonia / Northern Estonia	Human			Female	31	Symptomatic		Original	Nasopharyngeal swab		AY.5	GK	G142D,P681R,R158del,F157del,T19R,D950N,E156G,T478K,D614G,L452R	delta
hCoV-19/Estonia/RC0052494/2021	EPI_ISL_4255520	2021-08-16	Europe / Estonia / Northern Estonia	Human			Female	37	Symptomatic		Original	Nasopharyngeal swab		AY.122.2	GK	G142D,P681R,R158del,F157del,T19R,D950N,E156G,T478K,A411S,D614G,L452R)	delta
hCoV-19/Estonia/RC0052474/2021	EPI_ISL_4255518	2021-08-17	Europe / Estonia / Northern Estonia	Human			Male	38	Symptomatic		Original	Nasopharyngeal swab		AY.122	GK	G142D,S680P,P681R,R158del,F157del,T19R,D950N,E156G,T478K,D614G,L452R)	delta
hCoV-19/Estonia/RC0052405/2021	EPI_ISL_4255516	2021-08-16	Europe / Estonia / Western Estonia	Human			Female	37	Symptomatic		Original	Nasopharyngeal swab		AY.100	GK	T95I,G142D,L5F,P681R,R158del,F157del,T19R,D950N,E156G,T478K,D614G,L452R	delta
hCoV-19/Estonia/RC0052714/2021	EPI_ISL_4255525	2021-08-16	Europe / Estonia / Northern Estonia	Human			Female	30	Symptomatic		Original	Nasopharyngeal swab		AY.122	GK	G142D,P681R,R158del,F157del,T19R,D950N,E156G,T478K,A570S,D614G,L452R)	delta
hCoV-19/Estonia/RC0052365/2021	EPI_ISL_4255515	2021-08-17	Europe / Estonia / Northern Estonia	Human			Male	21	Symptomatic		Original	Nasopharyngeal swab		AY.100	GK	T95I,G142D,L5F,P681R,R158del,F157del,T19R,D950N,E156G,T478K,D614G,L452R,A522V)	delta
hCoV-19/Estonia/RC0052264/2021	EPI_ISL_4255511	2021-08-16	Europe / Estonia / Northern Estonia	Human			Male	20	Symptomatic		Original	Nasopharyngeal swab		AY.122	GK	C166S,G142D,P681R,R158del,F157del,T19R,D950N,E156G,T478K,D614G,L452R)	delta
hCoV-19/Estonia/RC0052131/2021	EPI_ISL_4255510	2021-08-16	Europe / Estonia / Northern Estonia	Human			Female	12	Symptomatic		Original	Nasopharyngeal swab		AY.122.2	GK	C166S,G142D,P681R,P1162S,R158del,F157del,T19R,D950N,E156G,T478K,A411S,D614G,L452R)	delta
hCoV-19/Estonia/RC0052271/2021	EPI_ISL_4255512	2021-08-17	Europe / Estonia / Northern Estonia	Human			Female	36	Symptomatic		Original	Nasopharyngeal swab		AY.122.2	GK	G142D,P681R,R158del,F157del,T19R,D950N,E156G,T478K,A411S,D614G,L452R)	delta
hCoV-19/Estonia/RC0053856/2021	EPI_ISL_4255540	2021-08-18	Europe / Estonia	Human			Female	4	Symptomatic		Original	Nasopharyngeal swab		AY.122	GK	G142D,P681R,R158del,F157del,T19R,D950N,E156G,T478K,A570S,D614G,L452R,G232V	delta
hCoV-19/Estonia/RC0052036/2021	EPI_ISL_4255507	2021-08-16	Europe / Estonia / Northern Estonia	Human			Male	29	Symptomatic		Original	Nasopharyngeal swab		AY.121	GK	T95I,G142D,P681R,R158del,F157del,T19R,D950N,E156G,T478K,E1258G,D614G,L452R)	delta
hCoV-19/Estonia/RC0052129/2021	EPI_ISL_4255509	2021-08-16	Europe / Estonia / Northern Estonia	Human			Female	37	Symptomatic		Original	Nasopharyngeal swab		AY.122.2	GK	G142D,P681R,R158del,F157del,T19R,D950N,E156G,T478K,A411S,D614G,L452R)	delta
hCoV-19/Estonia/RC0053411/2021	EPI_ISL_4255533	2021-08-17	Europe / Estonia / Northern Estonia	Human			Female	30	Symptomatic		Original	Nasopharyngeal swab		AY.122	GK	G142D,P681R,R158del,F157del,T19R,D950N,E156G,T478K,A570S,D614G,L452R)	delta
hCoV-19/Estonia/RC0053838/2021	EPI_ISL_4255538	2021-08-18	Europe / Estonia	Human			Male	52	Symptomatic		Original	Nasopharyngeal swab		AY.100	GK	T95I,G142D,L5F,P681R,R158del,F157del,T19R,D950N,E156G,T478K,D614G,L54F,L452R)	delta
hCoV-19/Estonia/RC0053718/2021	EPI_ISL_4255536	2021-08-17	Europe / Estonia / Northern Estonia	Human			Female	36	Symptomatic		Original	Nasopharyngeal swab		AY.122	GK	G142D,S680P,P681R,R158del,F157del,T19R,D950N,E156G,T478K,D614G,L452R)	delta
hCoV-19/Estonia/RC0053318/2021	EPI_ISL_4255532	2021-08-17	Europe / Estonia / Northern Estonia	Human			Male	54	Symptomatic		Original	Nasopharyngeal swab		AY.100	GK	T95I,G142D,L5F,P681R,R158del,F157del,T19R,D950N,E156G,T478K,D614G,L452R	delta
hCoV-19/Estonia/RC0053096/2021	EPI_ISL_4255530	2021-08-17	Europe / Estonia / Northern Estonia	Human			Male	43	Symptomatic		Original	Nasopharyngeal swab		AY.122	GK	G142D,P681R,R158del,F157del,T19R,D950N,E156G,T478K,D614G,L452R)	delta
hCoV-19/Estonia/RC0053436/2021	EPI_ISL_4255534	2021-08-17	Europe / Estonia	Human			Male	28	Symptomatic		Original	Nasopharyngeal swab		AY.122	GK	G142D,S680P,P681R,R158del,F157del,T19R,D950N,E156G,T478K,D614G,L452R)	delta
hCoV-19/Estonia/RC0053560/2021	EPI_ISL_4255535	2021-08-17	Europe / Estonia / Northern Estonia	Human			Female	31	Symptomatic		Original	Nasopharyngeal swab		AY.122	GK	C166S,G142D,P681R,R158del,F157del,T19R,D950N,E156G,T478K,A570S,D614G,L452R)	delta
hCoV-19/Estonia/RC0052900/2021	EPI_ISL_4255529	2021-08-17	Europe / Estonia / Northern Estonia	Human			Female	22	Symptomatic		Original	Nasopharyngeal swab		AY.122	GK	G142D,S680P,P681R,R158del,F157del,T19R,D950N,E156G,T478K,D614G,L452R)	delta
hCoV-19/Estonia/16482719/2021	EPI_ISL_4255449	2021-08-17	Europe / Estonia / Southern Estonia	Human			Female	25	Symptomatic		Original	Nasopharyngeal swab		AY.100	GK	T95I,G142D,L5F,P681R,R158del,F157del,T19R,D950N,E156G,T478K,D614G,L452R)	delta
hCoV-19/Estonia/16482713/2021	EPI_ISL_4255448	2021-08-17	Europe / Estonia / Southern Estonia	Human			Female	38	Symptomatic		Original	Nasopharyngeal swab		AY.9.2	GK	G142D,P681R,R158del,F157del,T19R,A222V,D950N,E156G,T478K,D614G,L452R)	delta
hCoV-19/Estonia/RC0059702/2021	EPI_ISL_4255444	2021-08-24	Europe / Estonia / Northern Estonia	Human			Female	50	Symptomatic		Original	Nasopharyngeal swab		AY.46	GK	G142D,P681R,R158del,F157del,T19R,D950N,E156G,T478K,D614G,L452R)	delta
hCoV-19/Estonia/RC0059640/2021	EPI_ISL_4255443	2021-08-24	Europe / Estonia / Western Estonia	Human			Male	3	Symptomatic		Original	Nasopharyngeal swab		AY.122.2	GK	G142D,P681R,R158del,F157del,T19R,D950N,E156G,T478K,A411S,D614G,L452R)	delta
hCoV-19/Estonia/RC0059247/2021	EPI_ISL_4255440	2021-08-24	Europe / Estonia / Northern Estonia	Human			Female	13	Asymptomatic		Original	Nasopharyngeal swab		AY.122.2	GK	G142D,P681R,R158del,F157del,T19R,D950N,E156G,T478K,A411S,D614G,L452R)	delta
hCoV-19/USA/LA-EVTL5028/2021	EPI_ISL_4254110	2021-09-01	North America / USA / Louisiana / Lincoln Parish	Human		Baseline surveillance	Female	18	Symptomatic	Not vaccinated	Original	Midturbinate swab		AY.103	GK	G142D,P681R,R158del,F157del,T19R,D950N,E156G,T299I,T478K,D614G,L452R)	delta
hCoV-19/USA/LA-EVTL5030/2021	EPI_ISL_4254112	2021-09-01	North America / USA / Louisiana / Lincoln Parish	Human		Baseline surveillance	Male	20	Symptomatic	Partially vaccinated, Pfizer/BioNTech, 1st dose in August 2021	Original	Midturbinate swab		AY.3	GK	T732A,G142D,P681R,R158del,F157del,T19R,D950N,E156G,T478K,D614G,L452R	delta
hCoV-19/Estonia/RC0059048/2021	EPI_ISL_4255437	2021-08-24	Europe / Estonia / Northern Estonia	Human			Female	45	Symptomatic		Original	Nasopharyngeal swab		AY.122	GK	G142D,P681R,R158del,F157del,T19R,D950N,G72V,E156G,T478K,A845S,D614G,L452R)	delta
hCoV-19/Estonia/RC0059821/2021	EPI_ISL_4255446	2021-08-24	Europe / Estonia / Northern Estonia	Human			Male	30	Symptomatic		Original	Nasopharyngeal swab		AY.122	GK	G142D,S680P,P681R,R158del,F157del,T19R,D950N,E156G,T478K,D614G,L452R)	delta
hCoV-19/Estonia/RC0058668/2021	EPI_ISL_4255436	2021-08-24	Europe / Estonia / Northern Estonia	Human			Female	18	Symptomatic		Original	Nasopharyngeal swab		AY.122	GK	G142D,S680P,P681R,R158del,F157del,T19R,D950N,E156G,T478K,D614G,L452R)	delta
hCoV-19/Estonia/RC0059233/2021	EPI_ISL_4255439	2021-08-24	Europe / Estonia / Northern Estonia	Human			Female	10	Symptomatic		Original	Nasopharyngeal swab		AY.9.2	GK	G142D,P681R,R158del,F157del,T19R,A222V,D950N,E156G,T478K,D614G,L452R)	delta
hCoV-19/USA/LA-EVTL5027/2021	EPI_ISL_4254109	2021-09-01	North America / USA / Louisiana / Lincoln Parish	Human		Baseline surveillance	Male	19	Symptomatic	Partially vaccinated, Moderna, 1st dose in June 2021	Original	Midturbinate swab		AY.3.1	GK	G142D,P681R,R158del,F157del,T19R,D950N,E156G,T478K,D614G,L452R	delta
hCoV-19/Estonia/RC0058592/2021	EPI_ISL_4255434	2021-08-23	Europe / Estonia / Northern Estonia	Human			Male	31	Symptomatic		Original	Nasopharyngeal swab		AY.100	GK	T95I,G142D,L5F,P681R,R158del,F157del,T19R,D950N,E156G,T478K,D614G,L452R)	delta
hCoV-19/Estonia/RC0058102/2021	EPI_ISL_4255430	2021-08-23	Europe / Estonia / Western Estonia	Human			Female	35	Symptomatic		Original	Nasopharyngeal swab		AY.122	GK	G142D,S680P,P681R,R158del,F157del,T19R,D950N,E156G,T478K,D614G,L452R)	delta
hCoV-19/Estonia/RC0058377/2021	EPI_ISL_4255432	2021-08-23	Europe / Estonia	Human			Female	10	Symptomatic		Original	Nasopharyngeal swab		AY.100	GK	T95I,G142D,L5F,P681R,R158del,F157del,T19R,D950N,E156G,T478K,D614G,L452R)	delta
hCoV-19/Estonia/RC0058370/2021	EPI_ISL_4255431	2021-08-23	Europe / Estonia	Human			Male	17	Symptomatic		Original	Nasopharyngeal swab		AY.100	GK	T95I,G142D,L5F,P681R,R158del,F157del,T19R,D950N,E156G,T478K,D614G,L452R)	delta
hCoV-19/USA/LA-EVTL5029/2021	EPI_ISL_4254111	2021-09-01	North America / USA / Louisiana / Lincoln Parish	Human		Baseline surveillance	Male	19	Symptomatic	Partially vaccinated, Moderna, 1st dose in March 2021	Original	Midturbinate swab		AY.3.1	GK	G142D,P681R,R158del,F157del,T19R,D950N,E156G,T478K,D614G,L452R)	delta
hCoV-19/Estonia/17096924/2021	EPI_ISL_4255469	2021-08-18	Europe / Estonia / Southern Estonia	Human			Female	45	Symptomatic		Original	Nasopharyngeal swab		AY.122	GK	G142D,S680P,P681R,R158del,F157del,T19R,D950N,L938F,E156G,T478K,D614G,L452R)	delta
hCoV-19/Estonia/17080674/2021	EPI_ISL_4255466	2021-08-17	Europe / Estonia / Southern Estonia	Human			Female	51	Symptomatic		Original	Nasopharyngeal swab		AY.122.2	GK	G142D,P681R,R158del,F157del,T19R,D950N,E156G,T478K,A411S,D614G,L452R)	delta
hCoV-19/Estonia/17080675/2021	EPI_ISL_4255467	2021-08-17	Europe / Estonia / Southern Estonia	Human			Male	12	Symptomatic		Original	Nasopharyngeal swab		AY.100	GK	T95I,G142D,L5F,P681R,R158del,F157del,T19R,D950N,E156G,T478K,D614G,L452R)	delta
hCoV-19/Estonia/16913328/2021	EPI_ISL_4255461	2021-08-16	Europe / Estonia / Southern Estonia	Human			Male	20	Symptomatic		Original	Nasopharyngeal swab		AY.122	GK	C166S,G142D,P681R,R158del,F157del,T19R,D950N,E156G,T478K,D614G,L452R	delta
hCoV-19/Estonia/16949951/2021	EPI_ISL_4255464	2021-08-16	Europe / Estonia / Southern Estonia	Human			Female	51	Symptomatic		Original	Nasopharyngeal swab		AY.122	GK	G142D,S680P,P681R,R158del,F157del,T19R,D950N,E156G,T478K,D614G,L452R)	delta
hCoV-19/Estonia/16799259/2021	EPI_ISL_4255459	2021-08-16	Europe / Estonia	Human			Female	30	Symptomatic		Original	Nasopharyngeal swab		AY.128	GK	T95I,G142D,P681R,R158del,F157del,T19R,D950N,E156G,T478K,D614G,L452R)	delta
hCoV-19/Estonia/16918396/2021	EPI_ISL_4255463	2021-08-17	Europe / Estonia / Southern Estonia	Human			Female	50	Symptomatic		Original	Nasopharyngeal swab		AY.9.2	GK	G142D,P681R,R158del,F157del,T19R,A222V,D950N,E156G,T478K,D614G,L452R)	delta
hCoV-19/Estonia/16799241/2021	EPI_ISL_4255458	2021-08-16	Europe / Estonia	Human			Female	19	Symptomatic		Original	Nasopharyngeal swab		AY.122	GK	G142D,S680P,P681R,R158del,F157del,T19R,D950N,E156G,T478K,D614G,L452R)	delta
hCoV-19/Estonia/16760014/2021	EPI_ISL_4255456	2021-08-17	Europe / Estonia	Human			Male	62	Symptomatic		Original	Nasopharyngeal swab		AY.122.2	GK	G142D,P681R,R158del,F157del,T19R,D950N,E156G,A262D,T478K,A411S,D614G,L452R)	delta
hCoV-19/Estonia/16721796/2021	EPI_ISL_4255455	2021-08-17	Europe / Estonia / Western Estonia	Human			Male	32	Symptomatic		Original	Nasopharyngeal swab		AY.122	GK	C166S,G142D,S680P,P681R,R158del,F157del,T19R,D950N,E156G,T478K,D614G,L452R)	delta
hCoV-19/Estonia/16775992/2021	EPI_ISL_4255457	2021-08-17	Europe / Estonia	Human			Female	40	Symptomatic		Original	Nasopharyngeal swab		AY.122	GK	G142D,S680P,P681R,R158del,F157del,T19R,D950N,E156G,T478K,D614G,L452R)	delta
hCoV-19/Estonia/16488436/2021	EPI_ISL_4255450	2021-08-17	Europe / Estonia / Western Estonia	Human			Female	41	Symptomatic		Original	Nasopharyngeal swab		AY.100	GK	T95I,G142D,L5F,P681R,R158del,F157del,T19R,D950N,E156G,T478K,D614G,L452R	delta
hCoV-19/Estonia/16581312/2021	EPI_ISL_4255451	2021-08-17	Europe / Estonia / Southern Estonia	Human			Male	32	Symptomatic		Original	Nasopharyngeal swab		AY.43	GK	G142D,P681R,R158del,F157del,T19R,D950N,E156G,T478K,D614G,L452R)	delta
hCoV-19/Estonia/17780743/2021	EPI_ISL_4255405	2021-08-25	Europe / Estonia / Western Estonia	Human			Male	25	Symptomatic		Original	Nasopharyngeal swab		AY.43	GK	G142D,P681R,R158del,F157del,T19R,D950N,E156G,T478K,D614G,L452R)	delta
hCoV-19/Estonia/17772612/2021	EPI_ISL_4255403	2021-08-24	Europe / Estonia / Southern Estonia	Human			Female	40	Symptomatic		Original	Nasopharyngeal swab		AY.100	GK	T95I,G142D,L5F,P681R,R158del,F157del,T19R,D950N,E156G,T478K,D614G,L452R)	delta
hCoV-19/Estonia/17772835/2021	EPI_ISL_4255404	2021-08-23	Europe / Estonia / Southern Estonia	Human			Male	28	Symptomatic		Original	Nasopharyngeal swab		AY.9.2	GK	G142D,P681R,R158del,F157del,T19R,A222V,D950N,E156G,T478K,D614G,L452R)	delta
hCoV-19/Estonia/17884271/2021	EPI_ISL_4255407	2021-08-25	Europe / Estonia / Northern Estonia	Human			Female	79	Symptomatic		Original	Nasopharyngeal swab		AY.126	GK	T95I,G142D,I850L,P681R,R158del,F157del,T19R,D950N,E156G,T478K,D614G,L452R	delta
hCoV-19/Estonia/17772416/2021	EPI_ISL_4255402	2021-08-24	Europe / Estonia / Southern Estonia	Human			Male	36	Symptomatic		Original	Nasopharyngeal swab		AY.122	GK	G142D,S680P,P681R,R158del,F157del,T19R,D950N,L938F,E156G,T478K,D614G,L452R)	delta
hCoV-19/Estonia/16632000/2021	EPI_ISL_4255454	2021-08-18	Europe / Estonia / Southern Estonia	Human			Female	0	Symptomatic		Original	Nasopharyngeal swab		AY.122	GK	G142D,P681R,R158del,F157del,T19R,D950N,E156G,T478K,D614G,L452R	delta
hCoV-19/Estonia/16581327/2021	EPI_ISL_4255453	2021-08-17	Europe / Estonia / Southern Estonia	Human			Female	14	Symptomatic		Original	Nasopharyngeal swab		AY.100	GK	T95I,G142D,L5F,P681R,R158del,F157del,T19R,D950N,E156G,T478K,D614G,L452R)	delta
hCoV-19/Estonia/RC0057886/2021	EPI_ISL_4255427	2021-08-23	Europe / Estonia / Northern Estonia	Human			Male	35	Symptomatic		Original	Nasopharyngeal swab		AY.122	GK	G142D,P681R,R158del,F157del,T19R,D950N,E156G,T478K,D614G,L452R	delta
hCoV-19/Estonia/RC0057592/2021	EPI_ISL_4255421	2021-08-23	Europe / Estonia / Northern Estonia	Human			Male	52	Symptomatic		Original	Nasopharyngeal swab		AY.125	GK	T95I,G142D,P681R,R158del,F157del,T19R,D950N,E156G,T478K,D614G,L452R)	delta
hCoV-19/Estonia/RC0057902/2021	EPI_ISL_4255428	2021-08-23	Europe / Estonia / Northern Estonia	Human			Female	48	Symptomatic		Original	Nasopharyngeal swab		AY.122.2	GK	G142D,P681R,R158del,F157del,T19R,D950N,E156G,T478K,A411S,D614G,L452R)	delta
hCoV-19/Estonia/RC0057646/2021	EPI_ISL_4255423	2021-08-23	Europe / Estonia / Northern Estonia	Human			Female	2	Symptomatic		Original	Nasopharyngeal swab		AY.43	GK	G142D,P681R,R158del,F157del,T19R,D950N,E156G,T478K,D614G,L452R)	delta
hCoV-19/Estonia/RC0057621/2021	EPI_ISL_4255422	2021-08-23	Europe / Estonia / Northern Estonia	Human			Female	54	Symptomatic		Original	Nasopharyngeal swab		AY.4	GK	T95I,G142D,N1187Y,P681R,R158del,F157del,T19R,D950N,E156G,T478K,D614G,L452R)	delta
hCoV-19/Estonia/RC0057512/2021	EPI_ISL_4255416	2021-08-23	Europe / Estonia / Northern Estonia	Human			Male	62	Symptomatic		Original	Nasopharyngeal swab		AY.122	GK	G142D,P681R,R158del,F157del,T19R,D950N,E156G,T478K,D614G,L452R)	delta
hCoV-19/Estonia/RC0057510/2021	EPI_ISL_4255415	2021-08-23	Europe / Estonia / Northern Estonia	Human			Male	18	Symptomatic		Original	Nasopharyngeal swab		AY.122.2	GK	G142D,P681R,R158del,F157del,T19R,D950N,E156G,T478K,A411S,D614G,L452R)	delta
hCoV-19/Estonia/RC0057590/2021	EPI_ISL_4255420	2021-08-23	Europe / Estonia / Northern Estonia	Human			Male	72	Symptomatic		Original	Nasopharyngeal swab		AY.5	GK	G142D,P681R,R158del,F157del,T19R,D950N,E156G,T478K,D614G,L452R)	delta
hCoV-19/Estonia/RC0057445/2021	EPI_ISL_4255412	2021-08-22	Europe / Estonia / Northern Estonia	Human			Female	50	Symptomatic		Original	Nasopharyngeal swab		AY.43	GK	G142D,P681R,R158del,F157del,T19R,D950N,E156G,T478K,D614G,L452R)	delta
hCoV-19/Estonia/RC0057530/2021	EPI_ISL_4255417	2021-08-23	Europe / Estonia / Northern Estonia	Human			Female	55	Symptomatic		Original	Nasopharyngeal swab		AY.122	GK	G142D,S680P,P681R,R158del,F157del,T19R,D950N,E156G,T478K,D614G,L452R)	delta
hCoV-19/Estonia/RC0057491/2021	EPI_ISL_4255414	2021-08-22	Europe / Estonia / Northern Estonia	Human			Male	51	Symptomatic		Original	Nasopharyngeal swab		AY.100	GK	T95I,G142D,L5F,P681R,R158del,F157del,T19R,D950N,E156G,T478K,D614G,L452R)	delta
hCoV-19/Estonia/RC0057401/2021	EPI_ISL_4255411	2021-08-22	Europe / Estonia / Northern Estonia	Human			Male	27	Symptomatic		Original	Nasopharyngeal swab		AY.122	GK	G142D,S680P,P681R,R158del,F157del,T19R,D950N,E156G,T478K,D614G,L452R)	delta
hCoV-19/Estonia/RC0057364/2021	EPI_ISL_4255410	2021-08-23	Europe / Estonia	Human			Male	47	Symptomatic		Original	Nasopharyngeal swab		AY.122.2	GK	G142D,P681R,R158del,F157del,T19R,D950N,E156G,T478K,A411S,D614G,L452R)	delta
hCoV-19/Estonia/RC0057564/2021	EPI_ISL_4255419	2021-08-23	Europe / Estonia / Northern Estonia	Human			Female	69	Symptomatic		Original	Nasopharyngeal swab		AY.5	GK	G142D,P681R,R158del,F157del,T19R,D950N,E156G,T478K,D614G,L452R)	delta
hCoV-19/Estonia/RC0057196/2021	EPI_ISL_4255408	2021-08-22	Europe / Estonia	Human			Female	25	Symptomatic		Original	Nasopharyngeal swab		AY.128	GK	T95I,G142D,P681R,R158del,F157del,T19R,D950N,E156G,T478K,D614G,L452R)	delta
hCoV-19/Estonia/17851185/2021	EPI_ISL_4255484	2021-08-17	Europe / Estonia / Southern Estonia	Human			Male	55	Symptomatic		Original	Nasopharyngeal swab		AY.43	GK	G142D,P681R,R158del,F157del,T19R,D950N,E156G,T478K,D614G,L452R)	delta
hCoV-19/Estonia/17766691/2021	EPI_ISL_4255480	2021-08-15	Europe / Estonia / Western Estonia	Human			Female	36	Symptomatic		Original	Nasopharyngeal swab		AY.4.5	GK	T95I,G142D,P681R,D1259Y,R158del,F157del,T19R,D950N,E156G,T478K,D614G,L452R)	delta
hCoV-19/Estonia/17766864/2021	EPI_ISL_4255481	2021-08-17	Europe / Estonia / Western Estonia	Human			Female	53	Symptomatic		Original	Nasopharyngeal swab		AY.4.5	GK	T95I,G142D,P681R,D1259Y,R158del,F157del,T19R,D950N,E156G,T478K,D614G,L452R)	delta
hCoV-19/Estonia/17350114/2021	EPI_ISL_4255477	2021-08-17	Europe / Estonia / Southern Estonia	Human			Female	45	Symptomatic		Original	Nasopharyngeal swab		AY.122.2	GK	G142D,P681R,R158del,F157del,T19R,D950N,E156G,T478K,A411S,D614G,L452R)	delta
hCoV-19/Estonia/17780231/2021	EPI_ISL_4255483	2021-08-17	Europe / Estonia / Western Estonia	Human			Male	4	Symptomatic		Original	Nasopharyngeal swab		AY.122	GK	G142D,S680P,P681R,R158del,F157del,T19R,D950N,E156G,T478K,D614G,L452R)	delta
hCoV-19/Estonia/17780001/2021	EPI_ISL_4255482	2021-08-17	Europe / Estonia / Western Estonia	Human			Male	52	Symptomatic		Original	Nasopharyngeal swab		AY.122	GK	G142D,S680P,P681R,R158del,F157del,T19R,D950N,E156G,T478K,D614G,L452R)	delta
hCoV-19/Estonia/17177350/2021	EPI_ISL_4255474	2021-08-18	Europe / Estonia / Southern Estonia	Human			Male	0	Symptomatic		Original	Nasopharyngeal swab		AY.122	GK	G142D,S680P,P681R,R158del,F157del,T19R,D950N,L938F,E156G,T478K,D614G,L452R)	delta
hCoV-19/Estonia/17350116/2021	EPI_ISL_4255478	2021-08-17	Europe / Estonia / Southern Estonia	Human			Female	22	Symptomatic		Original	Nasopharyngeal swab		AY.100	GK	T95I,G142D,L5F,P681R,R158del,F157del,T19R,D950N,E156G,T478K,D614G,L452R)	delta
hCoV-19/Estonia/17350266/2021	EPI_ISL_4255479	2021-08-17	Europe / Estonia / Southern Estonia	Human			Female	42	Symptomatic		Original	Nasopharyngeal swab		AY.122	GK	G142D,P681R,R158del,F157del,T19R,D950N,E156G,T478K,A570S,D614G,L452R	delta
hCoV-19/Estonia/17152857/2021	EPI_ISL_4255472	2021-08-17	Europe / Estonia / Southern Estonia	Human			Female	65	Symptomatic		Original	Nasopharyngeal swab		AY.4	GK	T95I,G142D,P681R,R158del,F157del,T19R,D950N,E156G,T478K,D614G,L452R)	delta
hCoV-19/Estonia/17152863/2021	EPI_ISL_4255473	2021-08-17	Europe / Estonia / Northern Estonia	Human			Female	53	Symptomatic		Original	Nasopharyngeal swab		AY.100	GK	T95I,G142D,L5F,P681R,R158del,F157del,T19R,D950N,E156G,T478K,D614G,L452R)	delta
hCoV-19/Estonia/17350110/2021	EPI_ISL_4255476	2021-08-17	Europe / Estonia / Southern Estonia	Human			Female	26	Symptomatic		Original	Nasopharyngeal swab		AY.4	GK	T95I,V401L,G142D,N1187Y,P681R,R158del,F157del,T19R,D950N,E156G,T478K,D614G,L452R)	delta
hCoV-19/Estonia/RC0051411/2021	EPI_ISL_4255499	2021-08-15	Europe / Estonia / Northern Estonia	Human			Male	31	Symptomatic		Original	Nasopharyngeal swab		AY.122	GK	G142D,P681R,R158del,F157del,T19R,D950N,E156G,T478K,D614G,L452R)	delta
hCoV-19/Estonia/17350108/2021	EPI_ISL_4255475	2021-08-17	Europe / Estonia / Southern Estonia	Human			Male	31	Symptomatic		Original	Nasopharyngeal swab		AY.100	GK	T95I,G142D,L5F,P681R,R158del,F157del,T19R,D950N,E156G,T478K,D614G,L452R)	delta
hCoV-19/Estonia/17896467/2021	EPI_ISL_4255494	2021-08-15	Europe / Estonia / Southern Estonia	Human			Female	40	Symptomatic		Original	Nasopharyngeal swab		AY.122	GK	G142D,S680P,P681R,R158del,F157del,T19R,D950N,E156G,T478K,D614G,L452R)	delta
hCoV-19/Estonia/AB0164418/2021	EPI_ISL_4255496	2021-08-17	Europe / Estonia / Northern Estonia	Human			Male	47	Symptomatic		Original	Nasopharyngeal swab		AY.5	GK	G142D,P681R,R158del,F157del,T19R,D950N,E156G,T478K,D614G,L452R)	delta
hCoV-19/Estonia/RC0051394/2021	EPI_ISL_4255497	2021-08-15	Europe / Estonia	Human			Male	18	Symptomatic		Original	Nasopharyngeal swab		AY.100	GK	T95I,G142D,L5F,P681R,R158del,F157del,T19R,D950N,E156G,T478K,D614G,L452R)	delta
hCoV-19/Estonia/17853642/2021	EPI_ISL_4255492	2021-08-17	Europe / Estonia / Southern Estonia	Human			Male	43	Symptomatic		Original	Nasopharyngeal swab		AY.43	GK	G142D,P681R,R158del,F157del,T19R,D950N,E156G,T478K,D614G,L452R	delta
hCoV-19/Estonia/17896379/2021	EPI_ISL_4255493	2021-08-18	Europe / Estonia / Southern Estonia	Human			Female	23	Symptomatic		Original	Nasopharyngeal swab		AY.122.2	GK	G142D,P681R,R158del,F157del,T19R,D950N,E156G,T478K,A411S,D614G,L452R)	delta
hCoV-19/Estonia/17853540/2021	EPI_ISL_4255490	2021-08-17	Europe / Estonia / Southern Estonia	Human			Male	45	Symptomatic		Original	Nasopharyngeal swab		AY.122	GK	G142D,P681R,R158del,F157del,T19R,D950N,E156G,T478K,D614G,L452R)	delta
hCoV-19/Estonia/RC0054339/2021	EPI_ISL_4255324	2021-08-18	Europe / Estonia / Northern Estonia	Human			Female	44	Symptomatic		Original	Nasopharyngeal swab		AY.122	GK	G142D,S680P,P681R,R158del,F157del,T19R,D950N,E156G,T478K,D614G,L452R)	delta
hCoV-19/Estonia/RC0054515/2021	EPI_ISL_4255326	2021-08-18	Europe / Estonia / Northern Estonia	Human			Male	38	Symptomatic		Original	Nasopharyngeal swab		AY.122	GK	G142D,P681R,R158del,F157del,T19R,D950N,E156G,T478K,A570S,D614G,L452R	delta
hCoV-19/Estonia/RC0054681/2021	EPI_ISL_4255328	2021-08-18	Europe / Estonia / Northern Estonia	Human			Female	56	Symptomatic		Original	Nasopharyngeal swab		AY.43	GK	G142D,P681R,R158del,F157del,T19R,D950N,E156G,T478K,D614G,L452R)	delta
hCoV-19/Estonia/RC0054646/2021	EPI_ISL_4255327	2021-08-18	Europe / Estonia / Southern Estonia	Human			Male	16	Symptomatic		Original	Nasopharyngeal swab		AY.122.2	GK	G142D,P681R,R158del,F157del,T19R,D950N,E156G,T478K,A411S,D614G,L452R)	delta
hCoV-19/Estonia/RC0054436/2021	EPI_ISL_4255325	2021-08-18	Europe / Estonia / Northern Estonia	Human			Male	58	Symptomatic		Original	Nasopharyngeal swab		AY.122	GK	G142D,S680P,P681R,R158del,F157del,T19R,D950N,E156G,T478K,D614G,L452R)	delta
hCoV-19/Estonia/17896393/2021	EPI_ISL_4255320	2021-08-20	Europe / Estonia / Southern Estonia	Human			Male	39	Symptomatic		Original	Nasopharyngeal swab		AY.100	GK	T95I,G142D,L5F,P681R,R158del,F157del,T19R,D950N,E156G,T478K,D614G,L452R	delta
hCoV-19/Estonia/17884329/2021	EPI_ISL_4255317	2021-08-18	Europe / Estonia / Northern Estonia	Human			Male	40	Symptomatic		Original	Nasopharyngeal swab		AY.5	GK	G142D,P681R,R158del,F157del,T19R,V70F,D950N,E156G,T478K,A845V,D614G,L452R)	delta
hCoV-19/Estonia/17896761/2021	EPI_ISL_4255321	2021-08-20	Europe / Estonia / Southern Estonia	Human			Female	41	Symptomatic		Original	Nasopharyngeal swab		AY.122	GK	G142D,S680P,P681R,R158del,F157del,T19R,D950N,L938F,E156G,T478K,D614G,L452R)	delta
hCoV-19/Estonia/17897598/2021	EPI_ISL_4255322	2021-08-20	Europe / Estonia / Western Estonia	Human			Male	11	Symptomatic		Original	Nasopharyngeal swab		AY.122	GK	G142D,R158del,F157del,T19R,D950N,E156G,T478K,D614G,L452R)	delta
hCoV-19/Estonia/17884312/2021	EPI_ISL_4255316	2021-08-19	Europe / Estonia / Northern Estonia	Human			Male	17	Symptomatic		Original	Nasopharyngeal swab		AY.122	GK	G142D,P681R,R158del,F157del,T19R,D950N,E156G,T478K,D614G,L452R)	delta
hCoV-19/Estonia/17896371/2021	EPI_ISL_4255319	2021-08-19	Europe / Estonia / Southern Estonia	Human			Female	11	Symptomatic		Original	Nasopharyngeal swab		AY.122	GK	G142D,S680P,P681R,R158del,F157del,T19R,D950N,E156G,T478K,D614G,L452R)	delta
hCoV-19/Estonia/17780631/2021	EPI_ISL_4255314	2021-08-19	Europe / Estonia / Western Estonia	Human			Female	67	Symptomatic		Original	Nasopharyngeal swab		AY.122	GK	G142D,S680P,P681R,R158del,F157del,T19R,D950N,E156G,T478K,D614G,L452R)	delta
hCoV-19/Estonia/17884339/2021	EPI_ISL_4255318	2021-08-18	Europe / Estonia	Human			Female	84	Symptomatic		Original	Nasopharyngeal swab		AY.43	GK	G142D,P681R,R158del,F157del,T19R,D950N,E156G,T478K,D614G,L452R	delta
hCoV-19/Estonia/17780626/2021	EPI_ISL_4255313	2021-08-19	Europe / Estonia / Western Estonia	Human			Female	37	Symptomatic		Original	Nasopharyngeal swab		AY.122	GK	C166S,G142D,S680P,P681R,R158del,F157del,T19R,D950N,E156G,T478K,D614G,L452R	delta
hCoV-19/Estonia/17852118/2021	EPI_ISL_4255315	2021-08-19	Europe / Estonia / Southern Estonia	Human			Female	32	Symptomatic		Original	Nasopharyngeal swab		AY.122	GK	G142D,S680P,P681R,R158del,F157del,T19R,D950N,E156G,T478K,D614G,L452R)	delta
hCoV-19/Estonia/RC0055963/2021	EPI_ISL_4255345	2021-08-20	Europe / Estonia / Northern Estonia	Human			Female	22	Symptomatic		Original	Nasopharyngeal swab		AY.122.2	GK	G142D,P681R,R158del,F157del,T19R,D950N,E156G,T478K,A411S,D614G,L452R)	delta
hCoV-19/Estonia/17780433/2021	EPI_ISL_4255310	2021-08-21	Europe / Estonia / Western Estonia	Human			Female	31	Symptomatic		Original	Nasopharyngeal swab		AY.9.2	GK	G142D,P681R,R158del,F157del,T19R,A222V,D950N,E156G,T478K,D614G,L452R)	delta
hCoV-19/Estonia/17780302/2021	EPI_ISL_4255309	2021-08-19	Europe / Estonia / Western Estonia	Human			Male	42	Symptomatic		Original	Nasopharyngeal swab		AY.9.2	GK	G142D,P681R,R158del,F157del,T19R,A222V,D950N,E156G,T478K,D614G,L452R)	delta
hCoV-19/Estonia/17780548/2021	EPI_ISL_4255311	2021-08-20	Europe / Estonia	Human			Female	18	Symptomatic		Original	Nasopharyngeal swab		AY.122	GK	G142D,S680P,I1169F,P681R,R158del,F157del,T19R,D950N,E156G,T478K,D614G,L452R)	delta
hCoV-19/Estonia/RC0055538/2021	EPI_ISL_4255341	2021-08-19	Europe / Estonia / Northern Estonia	Human			Female	35	Symptomatic		Original	Nasopharyngeal swab		AY.4.5	GK	T95I,G142D,P681R,D1259Y,R158del,F157del,T19R,D950N,E156G,T478K,D614G,L452R)	delta
hCoV-19/Estonia/RC0056424/2021	EPI_ISL_4255348	2021-08-20	Europe / Estonia / Northern Estonia	Human			Male	21	Symptomatic		Original	Nasopharyngeal swab		AY.9.2	GK	G142D,P681R,R158del,F157del,T19R,A222V,F1042L,D950N,E156G,T478K,D614G,L452R)	delta
hCoV-19/Estonia/RC0056401/2021	EPI_ISL_4255347	2021-08-21	Europe / Estonia / Northern Estonia	Human			Female	29	Symptomatic		Original	Nasopharyngeal swab		AY.122	GK	G142D,S680P,P681R,R158del,F157del,T19R,D950N,E156G,T478K,D614G,L452R)	delta
hCoV-19/Estonia/RC0055601/2021	EPI_ISL_4255342	2021-08-19	Europe / Estonia / Northern Estonia	Human			Male	12	Symptomatic		Original	Nasopharyngeal swab		AY.122	GK	G142D,S680P,P681R,R158del,F157del,T19R,D950N,E156G,T478K,D614G,L452R)	delta
hCoV-19/Estonia/RC0055165/2021	EPI_ISL_4255335	2021-08-19	Europe / Estonia / Northern Estonia	Human			Female	36	Symptomatic		Original	Nasopharyngeal swab		AY.122	GK	G142D,S680P,P681R,R158del,F157del,T19R,D950N,E156G,T478K,D614G,L452R)	delta
hCoV-19/Estonia/RC0055449/2021	EPI_ISL_4255339	2021-08-19	Europe / Estonia	Human			Female	11	Symptomatic		Original	Nasopharyngeal swab		AY.122	GK	G142D,S680P,P681R,R158del,F157del,T19R,D950N,E156G,T478K,D614G,L452R)	delta
hCoV-19/Estonia/RC0055654/2021	EPI_ISL_4255343	2021-08-19	Europe / Estonia / Northern Estonia	Human			Female	42	Symptomatic		Original	Nasopharyngeal swab		AY.122	GK	G142D,P681R,R158del,F157del,T19R,D950N,E156G,T478K,D614G,L452R)	delta
hCoV-19/Estonia/RC0054836/2021	EPI_ISL_4255331	2021-08-19	Europe / Estonia	Human			Female	40	Symptomatic		Original	Nasopharyngeal swab		AY.9.2	GK	G142D,P681R,R158del,F157del,T19R,A222V,D950N,E156G,T478K,D614G,L452R)	delta
hCoV-19/Estonia/RC0055164/2021	EPI_ISL_4255334	2021-08-19	Europe / Estonia / Northern Estonia	Human			Female	39	Symptomatic		Original	Nasopharyngeal swab		AY.43	GK	G142D,P681R,R158del,F157del,T19R,D950N,E156G,T478K,D614G,L452R)	delta
hCoV-19/Estonia/RC0055357/2021	EPI_ISL_4255337	2021-08-19	Europe / Estonia / Northern Estonia	Human			Male	45	Symptomatic		Original	Nasopharyngeal swab		AY.122	GK	G142D,S680P,P681R,R158del,F157del,T19R,L18F,D950N,E156G,T478K,D614G,L452R)	delta
hCoV-19/Estonia/RC0055173/2021	EPI_ISL_4255336	2021-08-19	Europe / Estonia / Northern Estonia	Human			Male	46	Symptomatic		Original	Nasopharyngeal swab		AY.122	GK	G142D,S680P,P681R,R158del,F157del,T19R,D950N,E156G,T478K,D614G,L452R)	delta
hCoV-19/Estonia/RC0054820/2021	EPI_ISL_4255330	2021-08-18	Europe / Estonia / Northern Estonia	Human			Female	3	Symptomatic		Original	Nasopharyngeal swab		AY.122	GK	G142D,S680P,P681R,R158del,F157del,T19R,D950N,E156G,T478K,D614G,L452R)	delta
hCoV-19/Estonia/RC0055003/2021	EPI_ISL_4255332	2021-08-19	Europe / Estonia / Northern Estonia	Human			Male	33	Symptomatic		Original	Nasopharyngeal swab		AY.4.5	GK	T95I,G142D,P681R,D1259Y,R158del,F157del,T19R,D950N,E156G,T478K,D614G,L452R)	delta
hCoV-19/Estonia/RC0055004/2021	EPI_ISL_4255333	2021-08-19	Europe / Estonia / Northern Estonia	Human			Female	37	Symptomatic		Original	Nasopharyngeal swab		AY.4.5	GK	T95I,G142D,P681R,D1259Y,R158del,F157del,T19R,D950N,E156G,T478K,D614G,L452R)	delta
hCoV-19/Estonia/17351764/2021	EPI_ISL_4255301	2021-08-19	Europe / Estonia / Southern Estonia	Human			Female	42	Symptomatic		Original	Nasopharyngeal swab		AY.43	GK	G142D,P681R,R158del,F157del,T19R,G72R,D950N,E156G,T478K,D614G,L452R)	delta
hCoV-19/Estonia/17772892/2021	EPI_ISL_4255306	2021-08-20	Europe / Estonia / Southern Estonia	Human			Female	35	Symptomatic		Original	Nasopharyngeal swab		AY.100	GK	T95I,G142D,L5F,P681R,R158del,F157del,T19R,D950N,E156G,T478K,D614G,L452R)	delta
hCoV-19/Estonia/17772696/2021	EPI_ISL_4255305	2021-08-19	Europe / Estonia	Human			Male	27	Symptomatic		Original	Nasopharyngeal swab		AY.100	GK	T95I,G142D,L5F,P681R,R158del,F157del,T19R,D950N,E156G,T478K,D614G,L452R)	delta
hCoV-19/Estonia/17772675/2021	EPI_ISL_4255304	2021-08-20	Europe / Estonia / Southern Estonia	Human			Female	17	Symptomatic		Original	Nasopharyngeal swab		AY.122	GK	G142D,S680P,P681R,R158del,F157del,T19R,D950N,E156G,T478K,D614G,L452R)	delta
hCoV-19/Estonia/17772905/2021	EPI_ISL_4255307	2021-08-20	Europe / Estonia / Southern Estonia	Human			Female	7	Symptomatic		Original	Nasopharyngeal swab		AY.9.2	GK	H655Y,G142D,P681R,R158del,F157del,T19R,A222V,D950N,E156G,T478K,D614G,L452R)	delta
hCoV-19/Estonia/17772663/2021	EPI_ISL_4255302	2021-08-21	Europe / Estonia / Southern Estonia	Human			Female	3	Symptomatic		Original	Nasopharyngeal swab		AY.122	GK	G142D,S680P,P681R,R158del,F157del,T19R,D950N,E156G,T478K,D614G,L452R)	delta
hCoV-19/Estonia/17772083/2021	EPI_ISL_4255399	2021-08-23	Europe / Estonia / Southern Estonia	Human			Female	46	Symptomatic		Original	Nasopharyngeal swab		AY.122.2	GK	G142D,P681R,R158del,F157del,T19R,D950N,E156G,T478K,A411S,D614G,L452R)	delta
hCoV-19/Estonia/17766571/2021	EPI_ISL_4255397	2021-08-23	Europe / Estonia / Southern Estonia	Human			Female	4	Symptomatic		Original	Nasopharyngeal swab		AY.4.5	GK	T95I,G142D,P681R,D1259Y,R158del,F157del,T19R,D950N,E156G,T478K,D614G,L452R)	delta
hCoV-19/USA/LA-EVTL5005/2021	EPI_ISL_4254087	2021-08-30	North America / USA / Louisiana / Lincoln Parish	Human		Baseline surveillance	Male	19	Symptomatic	Partially vaccinated, Pfizer/BioNTech, 1st dose in July 2021	Original	Midturbinate swab		AY.3.1	GK	G142D,P681R,R158del,F157del,T19R,D950N,E156G,T478K,D614G,L452R)	delta
hCoV-19/Estonia/17766580/2021	EPI_ISL_4255398	2021-08-22	Europe / Estonia / Southern Estonia	Human			Female	16	Symptomatic		Original	Nasopharyngeal swab		AY.122	GK	G142D,S680P,P681R,R158del,F157del,T19R,D950N,E156G,T478K,D614G,L452R)	delta
hCoV-19/Estonia/17766345/2021	EPI_ISL_4255393	2021-08-23	Europe / Estonia / Southern Estonia	Human			Female	24	Symptomatic		Original	Nasopharyngeal swab		AY.4	GK	T95I,G142D,P681R,R158del,F157del,T19R,D950N,E156G,T478K,D614G,L452R)	delta
hCoV-19/Estonia/17766355/2021	EPI_ISL_4255395	2021-08-23	Europe / Estonia	Human			Male	51	Symptomatic		Original	Nasopharyngeal swab		AY.122.2	GK	G142D,P681R,R158del,F157del,T19R,D950N,E156G,T478K,A411S,D614G,L452R)	delta
hCoV-19/Estonia/16775091/2021	EPI_ISL_4255367	2021-08-24	Europe / Estonia	Human			Female	35	Symptomatic		Original	Nasopharyngeal swab		AY.122	GK	G142D,P681R,R158del,F157del,T19R,D950N,E156G,T478K,A570S,D614G,L452R)	delta
hCoV-19/Estonia/16775733/2021	EPI_ISL_4255368	2021-08-23	Europe / Estonia	Human			Female	60	Symptomatic		Original	Nasopharyngeal swab		AY.122	GK	G142D,S680P,P681R,R158del,F157del,T19R,D950N,E156G,T478K,D614G,L452R)	delta
hCoV-19/USA/LA-EVTL5003/2021	EPI_ISL_4254085	2021-08-30	North America / USA / Louisiana / Lincoln Parish	Human		Baseline surveillance	Female	18	Symptomatic	Not vaccinated	Original	Midturbinate swab		AY.3	GK	G142D,P681R,R158del,F157del,T19R,D950N,E156G,T478K,D614G,L452R	delta
hCoV-19/USA/LA-EVTL5004/2021	EPI_ISL_4254086	2021-08-30	North America / USA / Louisiana / Lincoln Parish	Human		Baseline surveillance	Female	21	Symptomatic	Vaccinated, Johnson & Johnson, March 2021	Original	Midturbinate swab		AY.3.1	GK	G142D,P681R,R158del,F157del,T19R,D950N,E156G,T478K,D614G,L452R	delta
hCoV-19/USA/LA-EVTL4952/2021	EPI_ISL_4254034	2021-08-16	North America / USA / Louisiana / Lincoln Parish	Human		Baseline surveillance	Male	20	Symptomatic	Partially vaccinated, Pfizer/BioNTech, 1st dose in August 2021	Original	Midturbinate swab		AY.3.1	GK	G142D,P681R,R158del,F157del,T19R,D950N,E156G,T478K,D614G,L452R)	delta
hCoV-19/Estonia/16775075/2021	EPI_ISL_4255366	2021-08-23	Europe / Estonia / Northern Estonia	Human			Male	59	Symptomatic		Original	Nasopharyngeal swab		AY.4.5	GK	T95I,G142D,P681R,D1259Y,R158del,F157del,T19R,D950N,E156G,T478K,D614G,L452R)	delta
hCoV-19/USA/LA-EVTL4951/2021	EPI_ISL_4254033	2021-08-16	North America / USA / Louisiana / Lincoln Parish	Human		Baseline surveillance	Male	22	Symptomatic	Partially vaccinated, Pfizer/BioNTech, 1st dose in August 2021	Original	Midturbinate swab		AY.3.1	GK	G142D,P681R,R158del,F157del,T19R,D950N,E156G,T478K,D614G,L452R)	delta
hCoV-19/Estonia/16482774/2021	EPI_ISL_4255357	2021-08-25	Europe / Estonia / Southern Estonia	Human			Male	33	Symptomatic		Original	Nasopharyngeal swab		AY.100	GK	T95I,G142D,L5F,P681R,R158del,F157del,T19R,D950N,E156G,T478K,D614G,L452R)	delta
hCoV-19/Estonia/16581412/2021	EPI_ISL_4255360	2021-08-24	Europe / Estonia / Southern Estonia	Human			Female	68	Symptomatic		Original	Nasopharyngeal swab		AY.122	GK	C166S,G142D,S680P,P681R,R158del,F157del,T19R,D950N,E156G,T478K,D614G,L452R)	delta
hCoV-19/Estonia/16581415/2021	EPI_ISL_4255362	2021-08-24	Europe / Estonia / Southern Estonia	Human			Male	38	Symptomatic		Original	Nasopharyngeal swab		AY.122	GK	G142D,S680P,P681R,R158del,F157del,T19R,D950N,E156G,T478K,D614G,L452R)	delta
hCoV-19/Estonia/RC0056535/2021	EPI_ISL_4255352	2021-08-20	Europe / Estonia / Northern Estonia	Human			Female	10	Symptomatic		Original	Nasopharyngeal swab		AY.122	GK	G142D,S680P,P681R,R158del,F157del,T19R,D950N,E156G,T478K,D614G,L452R)	delta
hCoV-19/Estonia/16482963/2021	EPI_ISL_4255358	2021-08-25	Europe / Estonia / Southern Estonia	Human			Female	54	Symptomatic		Original	Nasopharyngeal swab		B.1.617.2	GK	G142D,K77T,P681R,R158del,F157del,T19R,D950N,E156G,T478K,D614G,L452R)	delta
hCoV-19/Estonia/RC0056597/2021	EPI_ISL_4255353	2021-08-21	Europe / Estonia / Northern Estonia	Human			Male	27	Symptomatic		Original	Nasopharyngeal swab		AY.122	GK	G142D,R158del,F157del,T19R,D950N,E156G,T478K,D614G,L452R)	delta
hCoV-19/Estonia/16096199/2021	EPI_ISL_4255356	2021-08-24	Europe / Estonia / Western Estonia	Human			Female	12	Symptomatic		Original	Nasopharyngeal swab		AY.122	GK	C166S,G142D,S680P,P681R,R158del,F157del,V83F,T19R,D950N,E156G,T478K,D614G,L452R)	delta
hCoV-19/Estonia/16482964/2021	EPI_ISL_4255359	2021-08-25	Europe / Estonia / Southern Estonia	Human			Male	17	Symptomatic		Original	Nasopharyngeal swab		B.1.617.2	GK	G142D,K77T,P681R,R158del,F157del,T19R,D950N,E156G,T478K,D614G,L452R)	delta
hCoV-19/Estonia/RC0056474/2021	EPI_ISL_4255351	2021-08-20	Europe / Estonia / Western Estonia	Human			Male	59	Symptomatic		Original	Nasopharyngeal swab		AY.100	GK	T95I,G142D,L5F,P681R,R158del,F157del,T19R,D950N,E156G,T478K,D614G,L452R	delta
hCoV-19/Estonia/16096171/2021	EPI_ISL_4255355	2021-08-25	Europe / Estonia / Western Estonia	Human			Female	38	Symptomatic		Original	Nasopharyngeal swab		AY.122	GK	G142D,S680P,P681R,A688T,R158del,F157del,T19R,D950N,E156G,T478K,D614G,L452R)	delta
hCoV-19/Estonia/13184819/2021	EPI_ISL_4255354	2021-08-24	Europe / Estonia / Southern Estonia	Human			Male	40	Symptomatic		Original	Nasopharyngeal swab		AY.122.2	GK	G142D,P681R,R158del,F157del,T19R,D950N,E156G,T478K,A411S,D614G,L452R)	delta
hCoV-19/Estonia/17005699/2021	EPI_ISL_4255380	2021-08-24	Europe / Estonia / Northern Estonia	Human			Male	75	Symptomatic		Original	Nasopharyngeal swab		AY.122	GK	G142D,S680P,P681R,R158del,F157del,T19R,D950N,E156G,T478K,D614G,L452R)	delta
hCoV-19/Estonia/17096213/2021	EPI_ISL_4255382	2021-08-23	Europe / Estonia / Southern Estonia	Human			Male	6	Symptomatic		Original	Nasopharyngeal swab		AY.9.2	GK	G142D,P681R,R158del,F157del,T19R,A222V,D950N,E156G,T478K,D614G,L452R)	delta
hCoV-19/Estonia/17315116/2021	EPI_ISL_4255384	2021-08-24	Europe / Estonia / Southern Estonia	Human			Male	51	Symptomatic		Original	Nasopharyngeal swab		AY.122.2	GK	G142D,P681R,R158del,F157del,T19R,D950N,E156G,T478K,A411S,D614G,L452R)	delta
hCoV-19/Estonia/17762733/2021	EPI_ISL_4255389	2021-08-24	Europe / Estonia / Southern Estonia	Human			Female	21	Symptomatic		Original	Nasopharyngeal swab		AY.122	GK	C166S,G142D,S680P,P681R,R158del,F157del,T19R,D950N,E156G,T478K,D614G,L452R)	delta
hCoV-19/USA/LA-EVTL4965/2021	EPI_ISL_4254047	2021-08-17	North America / USA / Louisiana / Lincoln Parish	Human		Baseline surveillance	Female	18	Symptomatic	Partially vaccinated, Pfizer/BioNTech, 1st dose in July 2021	Original	Midturbinate swab		AY.3	GK	G142D,P681R,R158del,F157del,T19R,D950N,E156G,T478K,D614G,L452R	delta
hCoV-19/Estonia/16933820/2021	EPI_ISL_4255379	2021-08-23	Europe / Estonia	Human			Male	41	Symptomatic		Original	Nasopharyngeal swab		AY.122.2	GK	G142D,P681R,R158del,F157del,T19R,D950N,E156G,T478K,A411S,D614G,L452R)	delta
hCoV-19/Estonia/16918181/2021	EPI_ISL_4255371	2021-08-24	Europe / Estonia / Southern Estonia	Human			Male	40	Symptomatic		Original	Nasopharyngeal swab		AY.122.2	GK	G142D,P681R,R158del,F157del,T19R,D950N,E156G,T478K,A411S,D614G,L452R)	delta
hCoV-19/Estonia/16933500/2021	EPI_ISL_4255378	2021-08-23	Europe / Estonia	Human			Male	51	Symptomatic		Original	Nasopharyngeal swab		AY.122	GK	G142D,P681R,R158del,F157del,T19R,D950N,E156G,T478K,D614G,L452R)	delta
hCoV-19/Estonia/16918977/2021	EPI_ISL_4255374	2021-08-23	Europe / Estonia / Southern Estonia	Human			Female	51	Symptomatic		Original	Nasopharyngeal swab		AY.100	GK	T95I,G142D,L5F,P681R,R158del,F157del,T19R,D950N,E156G,T478K,D614G,L452R)	delta
hCoV-19/Estonia/16933268/2021	EPI_ISL_4255377	2021-08-23	Europe / Estonia	Human			Female	34	Symptomatic		Original	Nasopharyngeal swab		AY.43	GK	G142D,P681R,R158del,F157del,T19R,D950N,E156G,A1078S,T478K,D614G,L452R)	delta
hCoV-19/Estonia/16922094/2021	EPI_ISL_4255376	2021-08-24	Europe / Estonia	Human			Female	63	Symptomatic		Original	Nasopharyngeal swab		AY.122	GK	G142D,P681R,R158del,F157del,T19R,D950N,E156G,T478K,D614G,L452R)	delta
hCoV-19/Estonia/16913345/2021	EPI_ISL_4255192	2021-08-12	Europe / Estonia / Southern Estonia	Human			Male	50	Symptomatic		Original	Nasopharyngeal swab		AY.9.2	GK	G142D,P681R,R158del,F157del,T19R,A222V,D950N,E156G,T478K,D614G,L452R)	delta
hCoV-19/Estonia/16918888/2021	EPI_ISL_4255373	2021-08-24	Europe / Estonia / Southern Estonia	Human			Female	32	Symptomatic		Original	Nasopharyngeal swab		AY.100	GK	T95I,G142D,L5F,P681R,R158del,F157del,T19R,D950N,E156G,T478K,D614G,L452R)	delta
hCoV-19/Estonia/16918795/2021	EPI_ISL_4255372	2021-08-23	Europe / Estonia / Southern Estonia	Human			Female	63	Symptomatic		Original	Nasopharyngeal swab		AY.122.2	GK	G142D,P681R,R158del,F157del,T19R,D950N,E156G,T478K,A411S,D614G,L452R)	delta
hCoV-19/Estonia/16963692/2021	EPI_ISL_4255199	2021-08-11	Europe / Estonia	Human			Female	64	Symptomatic		Original	Nasopharyngeal swab		AY.9.2	GK	G142D,P681R,R158del,F157del,T19R,A222V,D950N,E156G,T478K,D614G,L452R)	delta
hCoV-19/Estonia/16913682/2021	EPI_ISL_4255195	2021-08-14	Europe / Estonia / Southern Estonia	Human			Female	52	Symptomatic		Original	Nasopharyngeal swab		AY.122.2	GK	G142D,P681R,R158del,F157del,T19R,D950N,E156G,T478K,A411S,D614G,L452R)	delta
hCoV-19/Estonia/16913347/2021	EPI_ISL_4255193	2021-08-12	Europe / Estonia / Southern Estonia	Human			Female	33	Symptomatic		Original	Nasopharyngeal swab		AY.122.2	GK	G142D,P681R,R158del,F157del,T19R,D950N,E156G,T478K,A411S,D614G,L452R)	delta
hCoV-19/Estonia/17178071/2021	EPI_ISL_4255209	2021-08-12	Europe / Estonia / Western Estonia	Human			Male	35	Symptomatic		Original	Nasopharyngeal swab		AY.122	GK	G142D,S680P,P681R,R158del,F157del,T19R,D950N,E156G,T478K,D614G,L452R)	delta
hCoV-19/Estonia/17152710/2021	EPI_ISL_4255206	2021-08-14	Europe / Estonia / Western Estonia	Human			Female	67	Symptomatic		Original	Nasopharyngeal swab		AY.122	GK	G142D,P681R,R158del,F157del,T19R,D950N,E156G,T478K,A570S,D614G,L452R	delta
hCoV-19/Estonia/17178045/2021	EPI_ISL_4255208	2021-08-12	Europe / Estonia / Western Estonia	Human			Male	74	Symptomatic		Original	Nasopharyngeal swab		AY.100	GK	T95I,G142D,L5F,P681R,R158del,F157del,T19R,D950N,E156G,T478K,D614G,L452R)	delta
hCoV-19/Estonia/17152487/2021	EPI_ISL_4255200	2021-08-12	Europe / Estonia	Human			Female	18	Symptomatic		Original	Nasopharyngeal swab		AY.100	GK	T95I,G142D,L5F,P681R,R158del,F157del,T19R,D950N,E156G,T478K,D614G,L452R	delta
hCoV-19/Estonia/17152563/2021	EPI_ISL_4255204	2021-08-12	Europe / Estonia / Northern Estonia	Human			Female	80	Symptomatic		Original	Nasopharyngeal swab		AY.122	GK	G142D,P681R,R158del,F157del,T19R,D950N,E156G,T478K,D614G,L452R)	delta
hCoV-19/Estonia/17152497/2021	EPI_ISL_4255201	2021-08-12	Europe / Estonia / Southern Estonia	Human			Female	58	Symptomatic		Original	Nasopharyngeal swab		AY.9.2	GK	G142D,P681R,R158del,F157del,T19R,A222V,D950N,E156G,T478K,D614G,L452R)	delta
hCoV-19/Estonia/17897097/2021	EPI_ISL_4255224	2021-08-12	Europe / Estonia / Southern Estonia	Human			Male	59	Symptomatic		Original	Nasopharyngeal swab		AY.122.2	GK	G142D,P681R,R158del,F157del,T19R,D950N,E156G,T478K,A411S,D614G,L452R)	delta
hCoV-19/Estonia/RC0047584/2021	EPI_ISL_4255229	2021-08-11	Europe / Estonia	Human			Female	51	Symptomatic		Original	Nasopharyngeal swab		AY.9.2	GK	G142D,P681R,R158del,F157del,T19R,A222V,D950N,E156G,T478K,D614G,L452R)	delta
hCoV-19/Estonia/RC0047454/2021	EPI_ISL_4255228	2021-08-11	Europe / Estonia / Northern Estonia	Human			Female	32	Symptomatic		Original	Nasopharyngeal swab		AY.122	GK	G142D,S680P,P681R,R158del,F157del,T19R,D950N,E156G,T478K,D614G,L452R)	delta
hCoV-19/Estonia/17897098/2021	EPI_ISL_4255225	2021-08-12	Europe / Estonia / Southern Estonia	Human			Male	37	Symptomatic		Original	Nasopharyngeal swab		AY.100	GK	T95I,G142D,L5F,P681R,R158del,F157del,T19R,D950N,E156G,T478K,D614G,L452R)	delta
hCoV-19/Estonia/17853976/2021	EPI_ISL_4255221	2021-08-14	Europe / Estonia / Southern Estonia	Human			Female	79	Symptomatic		Original	Nasopharyngeal swab		AY.122.2	GK	G142D,P681R,R158del,F157del,T19R,D950N,E156G,T478K,A411S,D614G,L452R)	delta
hCoV-19/Estonia/RC0047152/2021	EPI_ISL_4255226	2021-08-11	Europe / Estonia / Northern Estonia	Human			Female	41	Symptomatic		Original	Nasopharyngeal swab		AY.43	GK	T95I,G142D,P681R,R158del,F157del,T19R,D950N,E156G,T478K,D614G,L452R)	delta
hCoV-19/Estonia/17897076/2021	EPI_ISL_4255223	2021-08-12	Europe / Estonia / Southern Estonia	Human			Male	24	Symptomatic		Original	Nasopharyngeal swab		AY.122.2	GK	G142D,P681R,R158del,F157del,T19R,D950N,E156G,T478K,A411S,D614G,L452R)	delta
hCoV-19/Estonia/17851439/2021	EPI_ISL_4255214	2021-08-12	Europe / Estonia / Southern Estonia	Human			Male	39	Symptomatic		Original	Nasopharyngeal swab		AY.100	GK	T95I,G142D,L5F,P681R,R158del,F157del,T19R,D950N,E156G,T478K,D614G,L452R)	delta
hCoV-19/Estonia/17896520/2021	EPI_ISL_4255222	2021-08-14	Europe / Estonia / Southern Estonia	Human			Female	52	Symptomatic		Original	Nasopharyngeal swab		AY.122.2	GK	G142D,P681R,R158del,F157del,T19R,D950N,E156G,T478K,A411S,D614G,L452R)	delta
hCoV-19/Estonia/17851455/2021	EPI_ISL_4255215	2021-08-12	Europe / Estonia / Southern Estonia	Human			Female	54	Symptomatic		Original	Nasopharyngeal swab		AY.9.2	GK	G142D,P681R,R158del,F157del,T19R,A222V,D950N,E156G,T478K,D614G,L452R)	delta
hCoV-19/Estonia/17853616/2021	EPI_ISL_4255218	2021-08-11	Europe / Estonia / Southern Estonia	Human			Male	40	Symptomatic		Original	Nasopharyngeal swab		AY.122.2	GK	G142D,P681R,R158del,F157del,T19R,D950N,E156G,T478K,A411S,D614G,L452R)	delta
hCoV-19/Estonia/17853631/2021	EPI_ISL_4255219	2021-08-11	Europe / Estonia / Southern Estonia	Human			Male	35	Symptomatic		Original	Nasopharyngeal swab		AY.122	GK	C166S,G142D,S680P,P681R,R158del,F157del,T19R,D950N,L938F,E156G,T478K,D614G,L452R)	delta
hCoV-19/Estonia/17188592/2021	EPI_ISL_4255210	2021-08-12	Europe / Estonia / Western Estonia	Human			Female	44	Symptomatic		Original	Nasopharyngeal swab		AY.122	GK	G142D,S680P,P681R,R158del,F157del,T19R,D950N,E156G,T478K,D614G,L452R)	delta
hCoV-19/Estonia/17851464/2021	EPI_ISL_4255216	2021-08-12	Europe / Estonia / Southern Estonia	Human			Male	9	Symptomatic		Original	Nasopharyngeal swab		AY.122	GK	G142D,P681R,R158del,F157del,T19R,D950N,E156G,T478K,D614G,L452R	delta
hCoV-19/Estonia/17780075/2021	EPI_ISL_4255212	2021-08-14	Europe / Estonia / Western Estonia	Human			Female	41	Symptomatic		Original	Nasopharyngeal swab		AY.122	GK	G142D,S680P,P681R,R158del,F157del,T19R,D950N,E156G,T478K,D614G,L452R)	delta
hCoV-19/Estonia/16963772/2021	EPI_ISL_4255289	2021-08-20	Europe / Estonia	Human			Female	38	Symptomatic		Original	Nasopharyngeal swab		AY.122	GK	G142D,S680P,P681R,R158del,F157del,T19R,D950N,E156G,T478K,D614G,L452R)	delta
hCoV-19/Estonia/16933732/2021	EPI_ISL_4255287	2021-08-20	Europe / Estonia	Human			Male	11	Asymptomatic		Original	Nasopharyngeal swab		AY.122	GK	G142D,S680P,P681R,R158del,F157del,T19R,D950N,E156G,T478K,D614G,L452R)	delta
hCoV-19/Estonia/16721799/2021	EPI_ISL_4255280	2021-08-19	Europe / Estonia / Western Estonia	Human			Female	47	Symptomatic		Original	Nasopharyngeal swab		AY.121	GK	V83I,T95I,G142D,P681R,R158del,F157del,P499R,T19R,D950N,E156G,T478K,D614G,L452R)	delta
hCoV-19/Estonia/16721753/2021	EPI_ISL_4255279	2021-08-19	Europe / Estonia / Western Estonia	Human			Male	28	Symptomatic		Original	Nasopharyngeal swab		AY.4.5	GK	T95I,G142D,P681R,D1259Y,R158del,F157del,T19R,D950N,E156G,T478K,D614G,L452R)	delta
hCoV-19/Estonia/16721912/2021	EPI_ISL_4255282	2021-08-20	Europe / Estonia / Western Estonia	Human			Female	35	Symptomatic		Original	Nasopharyngeal swab		AY.100	GK	T95I,G142D,L5F,P681R,R158del,F157del,T19R,D950N,E156G,T478K,D614G,L452R)	delta
hCoV-19/Estonia/16482815/2021	EPI_ISL_4255276	2021-08-19	Europe / Estonia / Southern Estonia	Human			Male	18	Symptomatic		Original	Nasopharyngeal swab		AY.100	GK	T95I,G142D,L5F,P681R,R158del,F157del,T19R,D950N,E156G,T478K,D614G,L452R)	delta
hCoV-19/Estonia/16482798/2021	EPI_ISL_4255275	2021-08-19	Europe / Estonia / Southern Estonia	Human			Male	63	Symptomatic		Original	Nasopharyngeal swab		AY.122.2	GK	C166S,G142D,P681R,R158del,F157del,T19R,D950N,E156G,T478K,A411S,D614G,L452R)	delta
hCoV-19/Estonia/16487595/2021	EPI_ISL_4255278	2021-08-21	Europe / Estonia / Southern Estonia	Human			Female	39	Symptomatic		Original	Nasopharyngeal swab		AY.100	GK	T95I,G142D,L5F,P681R,R158del,F157del,T19R,D950N,E156G,T478K,D614G,L452R)	delta
hCoV-19/Estonia/16482818/2021	EPI_ISL_4255277	2021-08-19	Europe / Estonia / Southern Estonia	Human			Female	43	Symptomatic		Original	Nasopharyngeal swab		AY.100	GK	T95I,G142D,L5F,P681R,R158del,F157del,T19R,D950N,E156G,T478K,D614G,L452R)	delta
hCoV-19/Estonia/16918985/2021	EPI_ISL_4255285	2021-08-20	Europe / Estonia / Southern Estonia	Human			Female	25	Symptomatic		Original	Nasopharyngeal swab		AY.9.2	GK	G142D,P681R,R158del,F157del,T19R,A222V,D950N,E156G,T478K,D614G,L452R)	delta
hCoV-19/Estonia/17152867/2021	EPI_ISL_4255298	2021-08-19	Europe / Estonia	Human			Female	46	Symptomatic		Original	Nasopharyngeal swab		AY.122	GK	G142D,S680P,P681R,R158del,F157del,T19R,D950N,E156G,T478K,D614G,L452R)	delta
hCoV-19/Estonia/15817273/2021	EPI_ISL_4255273	2021-08-19	Europe / Estonia / Southern Estonia	Human			Female	18	Symptomatic		Original	Nasopharyngeal swab		AY.33	GK	C166S,T250I,G142D,P681R,R158del,F157del,T19R,D950N,E156G,T29A,T478K,D614G,L452R)	delta
hCoV-19/Estonia/14499740/2021	EPI_ISL_4255270	2021-08-19	Europe / Estonia / Southern Estonia	Human			Female	19	Symptomatic		Original	Nasopharyngeal swab		AY.122.2	GK	C166S,G142D,P681R,R158del,F157del,T19R,D950N,E156G,T478K,A411S,D614G,L452R)	delta
hCoV-19/Estonia/15817270/2021	EPI_ISL_4255272	2021-08-19	Europe / Estonia / Southern Estonia	Human			Male	59	Symptomatic		Original	Nasopharyngeal swab		AY.9.2	GK	G142D,P681R,R158del,F157del,T19R,A222V,D950N,E156G,T478K,D614G,L452R)	delta
hCoV-19/Estonia/15817254/2021	EPI_ISL_4255271	2021-08-19	Europe / Estonia / Southern Estonia	Human			Male	22	Asymptomatic		Original	Nasopharyngeal swab		AY.33	GK	T250I,G142D,P681R,R158del,F157del,T19R,D950N,E156G,T29A,T478K,D614G,L452R)	delta
hCoV-19/Estonia/16209216/2021	EPI_ISL_4255274	2021-08-19	Europe / Estonia / Southern Estonia	Human			Female	81	Symptomatic		Original	Nasopharyngeal swab		AY.100	GK	T95I,G142D,L5F,P681R,R158del,F157del,T19R,D950N,E156G,T478K,D614G,L452R)	delta
hCoV-19/Estonia/17152873/2021	EPI_ISL_4255299	2021-08-19	Europe / Estonia / Western Estonia	Human			Male	78	Symptomatic		Original	Nasopharyngeal swab		AY.122	GK	G142D,S680P,P681R,R158del,F157del,T19R,D950N,E156G,T478K,D614G,L452R)	delta
[truncated: 9,165 more rows]

## Sheet: Supplementary File 1 i
Supplementary File 1 i | Severity information(severe and mild) from GISAID														Supplementary Table 9 | Severity information (severe and mild) from GISAID
[truncated: 73,925 more rows]

[truncated: 15 more sheets: Supplementary File 1 j, Supplementary File 1 k, Supplementary File 1 l, Supplementary File 1 m, Supplementary File 1 n, Supplementary File 1 o, Supplementary File 1 p, Supplementary File 1 q, Supplementary File 1 r, Supplementary File 1 s, Supplementary File 1 t, Supplementary File 1 u, Supplementary File 1 v, Supplementary File 1 w, Supplementary File 1 x]
